# Supplementary material for: Disruption of Protein BA_3317 Affects Asymmetric Division as an Exporter of Sporulation Signal Molecules in Bacillus anthracis
Source: Research Square preprint supplement (doi:10.21203/rs.3.rs-8551494/v1), 2026-01-28
Supplement: Supplementary file 1 [file 1e0d9870d2ddd1e442886fb1.xlsx]

## Sheet: RC_RPKM
geneID	A16R_1	A16R_2	A16R_3	ΔBA_3317_1	ΔBA_3317_2	ΔBA_3317_3	HΔBA_3317_1	HΔBA_3317_2	HΔBA_3317_3
BA_0001	6.80061	9.49584	7.69249	2.11717	3.16674	2.36434	15.0599	6.68591	8.48909
BA_0002	6.10742	8.99455	9.83695	9.58574	20.2911	1.00137	107.028	35.3232	41.6982
BA_0003	0.656259	0.615599	0.906007	0	0	0	2.33119	0.391296	0.39166
BA_0004	19.6284	18.2964	24.9394	0.228846	0.874076	1.1807	6.28544	3.97476	4.42051
BA_0005	67.1386	60.2966	75.2837	10.4219	26.415	6.65951	64.8834	36.2118	27.7781
BA_0006	54.8682	47.6131	52.5462	3.40957	6.50119	3.10282	17.3004	12.2871	14.4491
BA_0007	1.39266	0.979782	0.576797	0	0	0.126855	0.247353	0.996454	0.914266
BA_0008	166.04	176.492	184.502	50.5359	43.8183	31.877	73.9797	96.8468	71.681
BA_0009	6.97232	7.58877	10.7279	1.71019	4.58016	1.55138	8.31878	5.07757	4.12936
BA_0010	34.9778	46.1262	44.7522	3.77996	4.95489	5.00056	21.544	22.4455	21.3431
BA_0011	105.171	113.696	114.376	15.2997	25.3014	12.2432	159.432	84.5014	66.9885
BA_0012	111.662	95.268	120.31	14.4408	18.4978	11.4891	63.1018	51.9607	52.9866
BA_0013	92.0359	113.335	109.341	28.0845	29.0175	19.5498	119.442	72.8677	51.2357
BA_0014	7.08132	8.88932	7.57176	0.128697	0	0	0.739837	0.496735	0.870096
BA_0015	1.20504	5.24083	4.03304	0.135385	0	0.0997862	0.389143	0.261275	0.523036
BA_0016	0	1.08957	2.25689	0	0.281171	0.117559	1.22254	0.769525	0.308096
BA_0017	0	0	0	0	0	0	0	0	0
BA_0018	0	0	1.02439	0	0.151551	0	0	0	0
BA_0019	107.106	154.204	155.965	6.26438	8.17012	11.7119	23.8127	22.901	24.6932
BA_0020	101.914	117.615	131.941	12.2814	5.98835	9.05203	30.0432	52.9499	34.0709
BA_0021	304.982	313.238	344.508	22.9349	35.345	20.2	126.87	78.7792	65.8962
BA_0022	131.258	159.738	168.897	70.7986	67.8895	25.5177	134.92	92.3388	62.3679
BA_0024	40.3417	27.8965	34.0353	0.958771	0	0	0.306203	0	0
BA_0025	0	0	0	0	0	0	0	0	0
BA_0026	0.930124	0.275525	0.22528	0	0	0	1.5071	0.408644	0.642753
BA_0027	1.11124	0.416955	1.53413	0	0.121047	0	0.131579	0	0.132639
BA_0028	7.43049	5.70885	9.37897	4.46028	3.39179	1.16028	11.9824	8.27016	4.98361
BA_0029	39.9408	45.2715	45.4911	2.57087	1.72217	5.38141	15.8628	13.9912	11.8192
BA_0030	42.9306	49.2197	57.2562	38.0723	56.94	6.51746	84.0159	44.0846	42.4649
BA_0031	5.9223	3.08631	3.5473	2.32351	1.33119	1.45566	8.12555	3.92354	3.14175
BA_0032	2.39874	0.450024	0.220774	0	0	0.218497	3.69238	3.43261	2.57685
BA_0033	3.81605	4.39995	6.80489	0.393005	0.346403	0.434497	5.45986	3.31819	3.13149
BA_0034	16.1662	17.4622	8.79209	47.8282	56.2981	11.6019	279.879	139.913	78.6465
BA_0036	46.9255	47.1458	58.7591	6.11591	7.76108	3.48471	24.8103	15.6116	17.5951
BA_0037	3.53713	2.89259	3.42243	0.560429	1.38313	0.165226	1.28869	2.1631	1.73209
BA_0038	1.99823	0.117152	1.03451	0	0	0.568799	0	0.446794	0
BA_0039	12.439	11.8913	12.3236	4.69994	4.48785	0.938195	8.91231	6.33026	7.75469
BA_0040	0.48364	0.680511	0.890259	0	0	0	0.0954444	0	0.0962132
BA_0041	13.3776	12.2978	11.3274	0	0	0	0	0	0
BA_0042	9.32695	1.45818	4.29214	0	0.423328	0	0	0	3.24706
BA_0043	7.28456	3.00361	4.64159	0.593577	0.174397	0.364581	0.379142	0.4773	0.286647
BA_0044	25.8402	30.703	26.5762	1.52069	2.32331	3.0636	16.2212	9.19546	9.20402
BA_0045	0	0	0	0	0	0	0	0	0
BA_0046	62.8676	73.6282	71.2144	12.1829	16.2087	3.38846	131.041	53.4548	67.2692
BA_0047	798.674	960.317	841.277	1134.04	1478.53	730.094	4045.9	4121.41	3818.62
BA_0048	22.1453	22.3348	26.8355	2.11963	2.36284	2.29747	23.7131	11.2491	13.9691
BA_0049	86.9361	106.405	89.1506	16.8692	19.6396	9.64094	100.26	50.9219	58.8107
BA_0050	2.48441	2.79658	3.42988	2.30276	1.89439	1.24465	38.0954	12.7395	9.3411
BA_0051	18.3225	11.9437	9.718	4.98932	3.38284	0.282876	25.3725	7.03634	8.5256
BA_0052	66.3711	65.4383	77.4823	2.65459	5.40948	2.96178	16.8237	14.852	13.4545
BA_0053	18.9483	18.9917	24.8453	0.320783	0	1.65504	23.2046	11.7622	7.90043
BA_0054	1.6511	2.28244	3.75909	0.161093	0.189321	0.197889	5.35061	2.07258	1.81519
BA_0055	7.19458	4.38003	5.26229	0	0.207604	0.173601	1.91817	1.42046	0.90994
BA_0056	0.252958	0.237285	0.698449	0	0	0	0	0	0
BA_0057	9.26008	15.4659	9.97784	0.279123	1.47615	0.822912	21.9293	14.544	9.16587
BA_0058	20.9862	17.5875	13.0402	1.44819	1.16042	0.87332	16.1457	6.09775	8.90082
BA_0059	6.39442	11.2694	9.63042	4.7894	3.58826	2.11802	12.6191	5.7768	8.32633
BA_0060	103.768	124.009	108.921	17.8361	25.6254	17.4843	52.8047	34.249	37.0371
BA_0061	62.1333	100.377	82.9787	2.74756	3.88756	2.07839	4.71073	28.5702	11.6273
BA_0062	14.1559	23.4091	20.1923	1.50297	1.90764	0.930523	8.87046	8.4115	6.6774
BA_0063	21.5621	19.3834	23.0346	1.42754	2.93596	0.701449	13.6774	9.94845	6.43421
BA_0064	422.284	434.703	447.7	52.9567	59.5124	35.0986	162.441	131.96	117.931
BA_0065	5.12016	3.31236	3.73747	0	0.192324	0.160823	0.7317	0	0.632223
BA_0066	9.14263	7.60669	7.82928	0	0	0.289665	0.847219	0.568833	0.569362
BA_0067	82.3005	68.152	84.1405	29.0602	48.9299	30.4121	188.207	200.152	70.6177
BA_0068	2.29057	3.54994	5.72875	0.123078	0	0.272144	0.766493	1.60328	0.653795
BA_0069	22.5163	20.2319	16.3606	0.878737	1.2909	0.431783	3.78867	2.26112	1.41451
BA_0070	10.0516	12.5718	13.9503	1.97178	1.56418	0.871985	5.85648	2.0929	3.99925
BA_0071	14.2101	12.4772	16.8806	0.102102	0.0899948	0.301018	2.83692	2.66007	1.67642
BA_0072	6.72575	5.40775	4.77531	0.474971	0.8373	0.175039	1.8203	1.37494	1.14685
BA_0073	23.6381	25.7213	22.3775	4.00636	6.17976	1.72252	15.9939	9.1814	8.06136
BA_0074	1.02803	0	0	0	0	0	0	1.22593	0
BA_0075	7.98717	5.95542	10.2414	0.421834	0.446176	0.68401	4.9308	2.84928	1.05929
BA_0076	56.7553	39.57	50.186	13.2482	21.0291	5.66431	49.0145	29.7176	24.0953
BA_0077	4.37601	6.2281	8.61067	0.745942	1.8081	0	6.0749	6.11814	6.12383
BA_0078	19.1681	25.7203	19.8616	0.627517	0.41483	1.04065	4.96015	3.78444	1.6667
BA_0079	139.585	175.951	169.027	25.8556	26.1369	9.11158	78.4204	60.267	57.8258
BA_0080	910.868	1035.91	1159.54	93.5958	132.413	77.4423	283.639	325.244	266.896
BA_0081	65.6708	81.8988	92.6401	1.49947	1.48688	3.54582	9.81718	12.6602	9.71522
BA_0082	11.4751	21.8322	19.1536	0.160242	0.0706203	0.590533	3.83824	3.55631	3.48224
BA_0083	10.6007	11.6503	13.0474	2.17056	2.4598	1.02845	16.4143	14.2123	8.46043
BA_0084	63.221	81.3749	72.5925	16.6883	19.6125	12.3001	65.168	55.5065	41.0276
BA_0085	14.3219	22.4823	14.5266	1.44487	4.2982	2.66236	10.7287	8.71374	6.6286
BA_0086	135.737	126.521	157.666	32.9246	57.5728	17.1349	91.753	53.1207	45.7046
BA_0088	61.0904	52.2028	60.1734	4.13689	2.96266	8.48032	10.776	10.6032	16.3567
BA_0089	80.5184	68.8034	86.7103	34.1541	54.7299	10.7497	66.3311	53.1457	53.9084
BA_0090	12.3061	11.223	13.5285	1.68982	2.42035	3.58078	14.7737	22.8279	4.89623
BA_0091	43.4421	36.7984	57.0447	2.42983	2.14171	6.4814	11.7511	17.6405	10.0577
BA_0092	30.9775	28.8033	41.1407	3.69401	4.88398	6.55919	21.0748	17.6603	14.2711
BA_0093	48.4612	51.9243	67.538	70.6367	98.3004	20.9604	194.244	146.435	101.512
BA_0094	1.90585	0	0.438524	0	0	0	3.38501	0.568184	0.568712
BA_0095	1.16587	0	0	0	0	1.41596	4.14144	0.463435	4.63866
BA_0096	40.0675	36.1159	54.1746	5.80659	10.0939	6.06299	33.8437	29.5711	16.9803
BA_0097	1622.22	1603.85	1557.53	157.78	126.233	113.459	413.006	276.971	387.808
BA_0098	387.525	335.791	369.251	35.9036	45.115	15.9326	111.769	71.5665	85.5517
BA_0099	456.893	399.743	456.495	12.0358	9.85083	12.0392	108.232	49.2751	90.0067
BA_0100	376.108	323.359	368.988	40.7099	36.0937	12.5316	176.209	83.4169	117.956
BA_0101	15.9102	18.1925	23.3011	3.15749	0.506014	1.05783	10.0382	4.29315	8.5943
BA_0102	1278.41	1055.3	1310.52	21.8027	33.6947	30.1666	107.594	89.6701	114.313
BA_0103	2391.45	1971.45	2443.34	23.2602	31.519	33.779	136.749	119.734	172.663
BA_0104	1755.92	1908.66	1986.57	144.554	299.741	33.9816	723.714	505.422	484.465
BA_0105	1552.82	1330.12	1679.2	75.7838	83.4968	35.1356	133.507	90.8178	142.453
BA_0106	1725.77	1462.93	1814.07	92.5547	121.08	50.5566	219.766	115.607	187.617
BA_0107	2578.37	2078.22	2538.58	19.8583	25.0519	40.525	164.222	107.426	177.851
BA_0108	9128.06	7838.66	8853.34	141.158	129.782	237.389	733.337	568.663	899.152
BA_0109	1302.28	1032.62	1338.69	51.0794	66.4267	53.0778	116.065	109.35	181.969
BA_0110	3218.19	2423.57	3228.78	70.4625	76.9746	113.294	198.883	221.563	370.491
BA_0111	2901.46	2303.88	3046.35	39.1901	49.3819	91.1305	167.778	155.657	273.352
BA_0112	2023.1	1566.98	2066.89	93.9738	125.683	86.9619	144.855	147.316	158.62
BA_0113	3863.79	3137.04	4089.31	58.2109	57.8816	105.124	255.938	203.689	372.243
BA_0114	2312.61	1834.84	2452.51	63.0857	84.498	81.8264	121.479	132.489	183.387
BA_0115	5094.86	3988.31	5131.72	50.6743	47.1098	160.919	304.111	294.842	406.881
BA_0116	3724.02	2818.08	3781.14	56.487	65.4269	70.0949	202.359	154.958	277.697
BA_0117	2266.91	1683.36	2476.6	24.7609	16.936	43.3621	102.486	89.8358	150.758
BA_0118	1246.93	942.586	1279.53	13.3253	26.5215	25.6625	72.8962	68.0229	81.7865
BA_0119	5168.33	4048.94	5263.4	83.3547	106.316	65.0507	188.539	176.003	298.031
BA_0120	2764.96	2023.92	2583.95	29.4353	28.8277	40.8079	109.004	92.4225	223.374
BA_0121	1999	1441.45	1970.55	139.321	170.312	35.6551	155.467	118.697	213.587
BA_0122	3184.95	2408.69	3173.55	44.0216	66.9188	37.031	181.394	134.821	281.138
BA_0123	590.726	383.761	583.834	3.71761	3.27678	8.90524	26.2689	22.4202	29.6222
BA_0124	2823.09	2270.26	2719.59	48.817	57.6885	43.941	194.539	129.435	260.987
BA_0125	2531.39	1922.37	2546.49	13.7169	24.6025	31.2706	122.101	101.577	200.571
BA_0126	2666.66	2025.2	2637.03	65.071	97.3361	43.0597	158.594	112.516	210.562
BA_0127	6147.88	4931.73	6443.81	123.968	167.313	126.728	480.868	390.551	504.668
BA_0128	530.135	363.196	517.121	5.19597	4.1635	8.00756	21.271	27.3477	47.4468
BA_0129	1951.89	1580.77	2099.57	16.9986	16.7051	52.4195	181.96	161.95	195.503
BA_0130	906.464	887.116	1047.67	17.5111	21.3174	14.3677	202.534	116.621	184.955
BA_0131	571.812	539.495	540.465	5.68723	10.8417	6.33642	161.316	76.1908	146.519
BA_0132	809.025	758.112	848.453	4.60964	6.19613	9.42819	174.895	114.869	166.175
BA_0133	67.3298	49.0898	69.3109	1.57743	1.73797	2.90661	40.4286	28.92	45.3248
BA_0134	19.0838	18.4789	27.7628	0	0	0	0	1.46823	1.46959
BA_0135	1999.43	1672.99	2037.03	21.9046	35.9156	28.2969	177.375	106.137	211.788
BA_0136	1510.19	1243.34	1610.16	21.4372	20.064	25.4108	132.975	83.5946	137.675
BA_0137	1486.4	1228.41	1617.5	7.01236	9.31141	19.7342	123.815	90.8636	159.027
BA_0138	1154.14	1008.54	1294.11	116.605	137.108	31.332	412.98	191.575	218.131
BA_0139	44.6132	43.709	61.5913	1.22522	0.539969	1.6556	16.0433	13.6944	12.9183
BA_0140	12.1598	11.7767	23.9093	0.97582	1.97825	0.215769	10.1909	7.34447	7.72829
BA_0141	7.70981	9.45107	15.4014	0.216549	0.286306	0.877842	36.2048	19.1193	22.588
BA_0142	15.3545	14.7545	19.3883	0.231412	0.305958	1.19394	20.9524	6.69891	8.60493
BA_0143	199.776	203.525	222.547	6.68872	9.71038	27.1147	65.4048	41.0028	32.1108
BA_0144	349.415	332.426	381.37	285.981	332.292	105.068	452.187	214.159	252.697
BA_0145	0.487595	0	0	0	0	0	0	0	0
BA_0146	5.07336	4.2099	5.74694	0.120575	0	0	0	0	0
BA_0147	22.4251	26.8005	32.0122	14.7861	13.745	12.2679	25.8563	27.1318	19.8996
BA_0148	12.9656	13.2199	17.5367	4.04072	5.03533	5.34026	63.1448	48.8049	65.2682
BA_0149	34.4971	45.0687	39.0853	111.156	125.383	38.3711	204.101	185.053	109.939
BA_0150	342.536	392.716	398.226	0.675155	0.198366	0.0829374	0.97031	0.434318	0.760764
BA_0151	0	0	0	0	0	0	0	0	0
BA_0152	0	0	0	0	0	0	0	0	0
BA_0153	0.121402	0	0.446942	0	0	0.0552916	0	0.217159	0.0724537
BA_0154	17.7609	31.2018	26.886	0.481354	0.254565	0	20.6613	8.08182	8.74021
BA_0155	17.8781	17.0883	19.106	0.209427	0.184593	2.31538	2.60851	2.02082	2.32611
BA_0156	18.5347	20.5833	25.0082	0.865467	1.47483	2.04126	5.58337	5.84581	3.90083
BA_0157	36.2805	33.257	47.614	10.9219	14.7498	3.48362	28.9453	17.3182	11.1655
BA_0158	0	0	0	0	0	0	0	0	0
BA_0159	162.868	218.284	210.194	32.0598	46.34	15.4015	15.267	10.2197	10.1371
BA_0160	29.0636	25.811	32.7641	3.40053	6.65027	2.66302	7.02525	4.6143	4.31068
BA_0161	3.71132	7.85541	5.07992	1.29366	2.69517	0.693452	13.9722	9.64591	9.42771
BA_0162	71.5122	76.8588	80.8335	2.91233	1.82651	7.51289	17.6542	23.2382	20.447
BA_0163	28.58	41.547	43.0001	4.3432	2.81485	4.00145	31.5767	26.871	25.2921
BA_0164	63.7377	48.6275	62.9794	9.15221	12.7996	4.22728	51.7361	32.3812	21.4504
BA_0165	0.99174	1.99349	1.40176	0.0875456	0.0385823	0.193577	1.00654	0.633565	0.803262
BA_0166	13.6423	21.6743	15.1577	0	0.401638	2.68682	2.91055	2.63814	3.66749
BA_0167	99.5336	143.532	135.514	718.51	757.157	304.674	555.255	886.764	387.592
BA_0168	4.79486	7.06794	5.81404	1.22277	0.911961	0.623937	2.16285	0.816842	1.72605
BA_0169	0	0	0	0.175091	0	0	1.67757	0.844754	0
BA_0170	23.9351	26.2506	39.3997	4.64701	3.78091	3.35923	10.9596	8.88185	9.4943
BA_0171	14.2799	14.1606	17.649	1.26055	1.77773	1.11491	6.2803	4.62211	4.86991
BA_0172	100.341	148.15	125.398	6.78416	15.0963	14.3451	34.2048	35.0921	32.0097
BA_0173	3.95721	3.32128	4.98394	4.6331	4.53746	1.80228	24.9078	24.7126	24.487
BA_0174	8.49477	8.59589	8.12618	2.31457	2.47728	1.27947	9.42486	8.45501	6.62659
BA_0175	13.9641	9.56301	17.7408	12.3873	6.25242	0.780347	13.39	8.47937	8.69177
BA_0176	7.89101	15.1635	17.8394	0	0	0	0	0	0.36578
BA_0177	2.91365	3.41641	4.02248	3.60083	5.45505	0.414687	3.98905	7.70915	2.93438
BA_0178	0.442453	0.0461155	0.090494	0	0	0	0	0.234501	0.0586798
BA_0179	0.261026	0.122427	0.720726	0	0	0	0.927226	0.62255	0.623129
BA_0180	26.3541	32.4182	32.5889	15.0859	17.9642	7.29001	34.1248	36.4403	28.1276
BA_0181	4.89727	7.6216	9.57806	2.95736	3.63723	2.63595	9.09349	9.02548	8.10392
BA_0183	3.06079	1.43558	3.20122	4.64237	5.00119	2.02766	7.08369	6.13866	3.98554
BA_0184	0	0	0	0	0.352445	0.294717	19.1555	11.1892	8.1101
BA_0185	0.452201	0	1.10985	0.55885	0.246291	0.0686503	3.1234	5.75201	3.23852
BA_0186	1.38573	1.0399	0.446386	0.171255	0.150948	0.252447	2.70733	4.87483	3.14264
BA_0187	2.47949	2.39047	1.39459	0.510711	0.750254	0.690105	5.46405	14.6198	9.9474
BA_0188	7.55929	3.7143	3.64434	0.222432	0.784224	0.90169	2.66392	9.44375	5.26335
BA_0189	1.29621	1.05378	1.15324	2.24269	3.38872	1.29877	9.05542	14.7361	11.8101
BA_0190	220.16	166.557	267.751	0	0.324521	0.135684	2.64567	4.2632	3.02258
BA_0191	10.4461	12.3394	12.4631	41.3114	48.5504	13.3918	47.0939	48.1673	32.5108
BA_0192	0	2.73313	0	4.05093	0	0	8.62498	2.60591	3.47778
BA_0193	1.64508	3.08631	1.73039	0	1.53599	0	6.67853	3.92354	3.08565
BA_0194	1.31492	2.42711	2.03004	0.104841	0.0462047	0.386367	2.31034	1.71979	0.759439
BA_0195	103.327	83.4369	99.5893	24.2183	33.7294	13.2138	124.306	79.4141	61.3627
BA_0196	69.981	60.475	76.4758	32.5096	30.1101	5.93326	63.0866	37.9421	29.7041
BA_0197	58.4258	73.8418	83.8312	1.74972	1.74788	3.26708	6.81748	8.21669	12.6182
BA_0198	0	0	0	0	0	0	0	0	0
BA_0199	1.07021	3.21248	0.295498	0	0.816045	0.29245	7.60325	2.93532	1.66064
BA_0200	1.47138	0.306714	0.376172	0.707154	0	0.670127	1.83902	1.8521	1.75626
BA_0202	51.1882	56.9192	60.4934	8.11035	22.9856	11.1278	52.8402	37.8052	42.7814
BA_0204	59.453	52.8513	81.5219	40.4752	87.2596	12.1219	88.4055	95.836	71.2734
BA_0205	3.93185	5.31958	4.45388	4.01815	5.35371	1.03311	17.6376	10.2792	5.68588
BA_0206	0	0	0	0	0	0	0	0	0
BA_0207	0	0	0	0	0	0	0	0	0
BA_0208	10.6032	18.5362	11.7551	1.88617	1.83752	2.1219	9.51138	9.00433	4.50635
BA_0210	1.07795	0.539285	1.32282	0.0888117	0.0782806	0	0.425457	0	0.171554
BA_0211	2.48441	0	0	0	0	0	0	0	0
BA_0212	0	0	0	0	0	0	0	0	0
BA_0213	45.9924	27.7192	56.405	8.38383	25.3003	6.38879	27.3654	22.0756	8.37182
BA_0216	1.13922	1.46937	1.50723	0.527962	0.155119	0.0648559	1.43323	0.594354	0.424933
BA_0217	0	0	0.389207	0	0	0	0	0	0
BA_0218	0.16642	1.56109	2.06778	0.822677	0.815766	0.303178	4.72929	6.25138	3.57554
BA_0219	0	0	0	0	0	0	0	0	0
BA_0221	0	0	0	0	0	0	0	0	0
BA_0222	0	2.64772	0.670413	0.112526	0	0	0.323437	0.10858	0.326042
BA_0223	1.22337	1.42457	1.39775	0.156404	0.0459525	0	3.14689	1.10674	1.10776
BA_0224	7.30874	9.30443	7.68774	2.742	2.84336	0.951058	2.62714	2.95711	3.27143
BA_0225	1.77912	3.25433	4.17551	1.75897	1.7442	0.48617	15.3783	6.04658	7.53871
BA_0226	0	0	0	0	0	0	0	0	0
BA_0228	1.62808	1.00657	1.66872	0.0457286	0.161225	0.134818	0.788635	0.882498	0.0441659
BA_0229	8.51798	7.72388	8.36238	5.96525	4.63933	9.82792	11.4307	18.2839	8.47265
BA_0230	0	0	0	0	0	0	0	0	0
BA_0231	4.96584	4.11015	4.18636	15.2136	15.0006	3.57303	50.6465	48.0212	41.0926
BA_0232	0.582121	1.22862	1.60731	1.79853	0.871895	1.12677	16.715	9.97887	8.25108
BA_0233	2.7132	6.99902	3.12145	2.14226	0.328389	2.33411	8.38856	9.88627	8.90592
BA_0234	15.6163	11.4527	13.5889	1.22814	0.773221	3.4915	22.2731	33.1819	31.6877
BA_0235	55.5819	55.1101	59.4604	21.7904	25.2085	16.3743	119.149	101.517	97.9942
BA_0236	8.1882	10.3998	8.46991	3.13431	5.20958	1.32009	10.3819	7.34496	2.59475
BA_0238	3.25063	0	0	0	0	0	0	0	1.552
BA_0239	1.26479	0	2.32816	6.25235	7.57756	1.15208	8.23686	1.50827	9.81287
BA_0240	260.894	333.038	335.985	204.62	282.837	86.2048	310.392	278.915	169.926
BA_0241	223.68	232.892	273.042	170.141	171.843	81.3262	96.7572	100.83	64.7059
BA_0242	1612.25	1602.05	1792.85	172.82	176.767	211.773	284.846	330.404	308.961
BA_0243	0	0	0	0	0	0	0	0	0
BA_0244	6.2941	7.23898	8.8657	6.35811	3.27904	3.58948	20.738	17.9485	12.4123
BA_0245	14.4123	12.7983	11.9677	0.554133	0.5582	0.81685	4.32321	3.28458	4.28158
BA_0246	15.3181	9.01029	13.447	1.06213	1.04632	0.552595	1.6761	2.17033	1.2672
BA_0247	111.056	69.4912	104.595	9.97379	10.6067	6.3524	19.8391	9.57171	11.57
BA_0248	3.32632	2.37409	2.06316	1.60858	0.393844	0.131734	0.7706	1.55217	0.0863118
BA_0249	5.71588	9.92491	5.70848	0	0.132475	0	0.288002	0	0
BA_0250	0	0.363529	0	0	0	0	0	0	0
BA_0251	411.956	437.578	487.294	0.424333	2.4685	0.187653	1.3823	0.982683	0.737698
BA_0252	20.1728	23.8351	22.8385	0	0	0.271019	0.634146	0.354811	0.0710282
BA_0253	190.754	271.7	252.752	1.79728	0.79208	16.7794	25.2559	36.4192	41.6606
BA_0254	479.789	613.196	556.098	70.7408	69.4971	36.5702	221.218	193.877	289.426
BA_0255	2.66318	3.22053	2.86456	0.19827	0.349519	0.0876811	0.607886	0.382633	0.536184
BA_0256	0	0	0	0	0	0	0	0	0
BA_0257	0.151885	0.997324	0	0	0	0	0	0	0
BA_0258	3.82379	1.51752	1.48894	0	0	0	0	0	0
BA_0259	3.51838	3.86617	6.10638	0.124234	0.438009	0.0915668	3.2138	1.19877	1.43986
BA_0260	7.48166	8.95928	9.52309	0	0	0.289996	2.26184	0.379656	1.90004
BA_0261	24.9908	23.9562	28.9245	2.53848	3.57995	2.05809	10.1339	5.96033	5.96588
BA_0262	16.4318	16.2964	17.0887	3.44416	3.31173	1.91213	7.92829	7.81208	5.1841
BA_0263	251.933	333.01	302.615	101.004	217.569	50.0668	542.27	369.67	366.185
BA_0264	17.4819	14.6906	6.36893	28.3565	22.6137	4.97625	27.5999	18.6757	23.475
BA_0265	21.1544	21.8742	21.1906	8.75505	9.96766	3.85384	59.3007	26.2827	23.0188
BA_0266	303.483	299.844	370.621	26.6385	16.0089	4.46227	114.562	97.8516	73.9686
BA_0267	3921.23	4102.9	4443.27	387.285	276.391	325.352	1100.18	937.43	963.557
BA_0268	177.075	162.158	190.283	25.7686	27.6399	27.2738	61.3212	41.3695	36.6032
BA_0270	29.0854	26.2491	26.1896	6.55317	8.57837	7.17331	20.5144	15.3388	17.797
BA_0271	0.198469	0.279259	0.182666	0	0	0	0	0	0
BA_0272	1.20176	1.04059	0.7232	0.171368	0	0.0421025	0.27365	0.496075	0.110341
BA_0273	17.4456	19.5144	23.1106	0.631467	0.397564	0.332446	3.45723	1.30569	2.61381
BA_0274	8.45611	8.15668	7.85621	0.0985892	0.173797	0.290662	2.64486	0.951317	1.9044
BA_0275	7.12978	6.95916	9.75442	0	0	0	0.228168	0.459583	0.460011
BA_0276	25.0569	29.9147	35.5602	0	0.0954353	0.319215	0.414955	0.104477	0.836594
BA_0277	0.590773	0	0	0.456315	0	0	0.786961	0.176125	0.440722
BA_0278	5.21951	4.98054	3.64434	2.78039	2.54873	0.983662	5.75408	5.25845	6.01525
BA_0279	1.60285	2.70636	5.01574	0.198087	0	0	0.569368	0	0
BA_0280	3.39717	2.54935	4.95456	3.87542	6.66097	3.61809	4.39381	3.17858	1.87149
BA_0281	0	0	0	0	0	0	0	0	0
BA_0283	11.783	11.7898	15.0221	3.8832	3.42274	1.90808	11.0583	9.15938	9.58462
BA_0284	1.21223	1.48701	2.74636	1.26765	0.609456	0.424693	1.54579	0.333598	1.00173
BA_0285	0.82368	1.61553	1.79186	0.27762	0.0815669	0.409241	1.41862	0.892947	0.446889
BA_0286	0.736901	3.31797	0.746048	0	0	0.0671231	1.30882	0.703007	0.263873
BA_0287	1.17077	1.92191	0.359184	0.120575	0	0	0.808667	1.5125	0.232909
BA_0288	11.1875	9.68711	11.0888	0.177257	0.624954	0.130648	1.01899	1.36833	0.856
BA_0289	20.4279	15.9874	26.5888	0.52284	0.395008	0.935875	3.14875	2.66666	4.18406
BA_0290	66.7959	65.6029	77.7405	7.10385	11.0736	2.08467	24.1371	11.3611	11.3081
BA_0291	17.7053	18.6957	21.7274	3.58705	7.27193	1.32192	26.807	10.0376	23.5585
BA_0292	5.75131	6.42258	3.52891	0.338464	0	0.498931	2.91857	0	1.30759
BA_0293	37.3789	28.6618	43.3079	0.125871	0.776617	2.41211	3.49735	4.7368	2.7961
BA_0294	20.7531	18.6438	24.4095	0.348683	0.0341485	0.828104	2.04158	1.83181	2.39479
BA_0295	23.8433	16.0943	20.7231	1.88344	1.49945	1.34341	4.59867	2.98989	3.16871
BA_0296	5.68548	3.95285	5.84839	0	0.145722	0.121854	0.712805	0.877407	1.43709
BA_0297	0.829548	1.5563	0.981636	0	0	0.107946	1.40321	0.14132	0.848708
BA_0298	8.88238	11.7754	10.3023	0.0560064	0.543018	0.536635	3.48792	4.97188	5.84199
BA_0299	0.985164	2.82371	2.2668	0	0.119238	0.0997076	1.94418	1.10955	1.76386
BA_0300	9.75586	5.9683	12.4926	6.29047	13.3994	1.54547	25.1124	30.3493	12.6573
BA_0301	130.565	165.257	147.067	43.9514	74.4305	23.396	94.0658	82.8566	87.2573
BA_0302	243.749	161.143	207.018	2.5084	3.81893	2.52112	3.05878	4.84086	3.5239
BA_0304	0.832542	1.99578	1.70278	0.228643	0	0.337044	0.657196	0.661874	0.772904
BA_0305	38.674	33.2522	41.4175	8.73879	17.8713	3.92672	30.6266	17.4934	14.252
BA_0306	45.36	37.0603	48.0263	2.2252	6.48751	2.71245	17.4659	14.3282	11.1591
BA_0307	21.7495	20.4567	28.5507	1.5133	3.49343	1.48717	26.5126	15.2976	14.4071
BA_0308	0.993764	0.677958	0.249446	0	0	0.164582	1.71155	3.44747	0.754836
BA_0309	714.611	762.331	749.132	30.4534	43.9371	40.4679	179.06	109.713	166.332
BA_0310	0	0	0	0	0	0	2.21124	0	0.557262
BA_0311	15.1977	21.4421	21.4931	3.66479	4.03778	1.57566	10.3875	4.86236	3.24459
BA_0312	0.750931	0.384221	0.439815	1.68734	0.743627	0	5.81996	6.67546	2.60748
BA_0313	1.35989	0.588753	1.54044	0.129278	0.455793	0.0952845	4.33519	6.36195	3.1215
BA_0314	15.2323	7.10606	15.3689	15.8048	25.9092	6.67773	73.4951	126.763	74.3788
BA_0315	0	0	0.544889	0	0	0.134818	1.57727	2.118	0.883319
BA_0316	2.54945	1.02492	4.35769	0	0	0.33175	2.58749	4.7775	2.60833
BA_0317	12.6479	24.172	17.6788	0.438249	0.0643803	1.93807	8.32783	9.37382	10.864
BA_0318	11.2572	21.1194	12.7518	4.10229	6.76007	4.07529	69.7228	34.4211	25.1508
BA_0320	9.83484	11.4756	9.71406	0.296447	1.56777	0.218497	7.6688	4.00471	2.86317
BA_0321	76.7252	69.8664	87.8414	5.84146	4.62871	4.82733	19.1647	18.2763	13.2783
BA_0322	169.838	151.953	179.959	21.869	27.5596	11.5006	73.768	62.4922	64.1214
BA_0323	16.0649	22.7125	20.7284	9.49942	15.3226	3.71083	28.3967	20.8074	15.4137
BA_0324	1.77888	0.878243	0.172341	0.694238	1.01986	0.682253	3.76922	1.67473	1.22928
BA_0325	40.8507	32.244	39.898	25.1481	22.166	27.7335	49.0346	60.9998	36.7069
BA_0326	3.76569	3.72331	3.41901	2.01246	1.94012	2.13223	10.2433	6.73591	3.70516
BA_0327	40.7984	32.919	39.7561	20.6185	17.338	21.267	94.6869	81.2969	51.2727
BA_0328	0.215367	2.22225	6.34298	21.559	9.14938	69.0533	238.435	202.893	148.327
BA_0329	86.544	96.3139	95.4897	62.5362	94.5808	14.6423	257.561	97.6693	79.8566
BA_0330	1.92875	2.9551	2.13021	1.58909	0.980461	0.175686	3.50181	1.30336	1.07435
BA_0331	2.83804	1.83396	3.07643	0.623534	0.893095	0.287236	6.04882	3.23396	1.65612
BA_0332	1.91939	2.18239	3.10487	0.215643	0.0633575	0	0.41322	0.208081	0
BA_0333	3.63995	3.41443	3.53624	0.187434	0.0550695	0.138149	0.478887	0.180861	0.362058
BA_0334	11.887	12.1402	11.2642	0.782334	0.612947	0.128138	1.16599	2.51632	1.17538
BA_0335	0	0	0	0	0	0	0	0	0
BA_0336	0	0.382344	0	0.335819	0	0.123758	0.643504	1.13415	0.162172
BA_0337	1.18071	3.13807	1.90172	0	0.214358	0	1.86407	0.938668	0.352328
BA_0338	126.816	134.92	147.394	1.48437	6.43275	13.5846	8.77018	11.5779	16.3675
BA_0339	67.9326	67.0186	87.8677	4.34112	7.65272	9.19895	13.889	17.8775	12.6532
BA_0340	5.58259	5.75011	4.33211	2.36738	4.88875	1.59532	9.65611	5.93933	3.13575
BA_0341	8.61589	15.7049	12.3003	2.78298	10.7184	2.14038	25.5047	9.92422	5.84321
BA_0342	17.5312	19.8394	20.9013	1.07944	4.00965	2.61413	9.23414	7.66309	2.38298
BA_0343	0.228827	0	1.05303	0	0.997048	0.41687	1.62569	0.545755	0.409697
BA_0344	1333.24	1590.46	1617.48	46.8721	53.6289	137.4	455.726	554.427	620.128
BA_0345	695.017	797.066	842.894	12.674	7.67178	67.8661	167.517	303.382	287.441
BA_0346	25.5274	24.0519	28.7563	7.135	6.84385	2.78411	20.4413	14.7145	14.9985
BA_0347	63.0273	57.8084	77.2836	2.22549	2.47016	7.71549	24.1656	21.9516	18.8673
BA_0348	129.143	114.524	138.337	18.6424	28.4898	16.4094	97.403	52.5423	55.7001
BA_0349	5.181	7.58158	3.81477	0.682977	2.10697	2.6428	13.3327	5.10745	3.87538
BA_0350	3.76574	3.59665	4.53717	0	0.596658	0.311832	2.18893	1.38802	1.14414
BA_0351	15.8547	17.2918	14.6621	5.53132	10.7425	1.17469	25.8693	8.77494	9.50748
BA_0352	9.21766	9.64184	9.46024	1.9669	2.38379	2.53699	40.3598	32.1855	25.1708
BA_0353	46.8798	75.7153	62.8066	138.066	148.668	58.1987	821.447	723.149	620.935
BA_0354	0	0	0	0	0	0	0	0	0
BA_0355	0.210586	0	0.193818	0	0	0.127879	0	0.334833	0.0837861
BA_0356	0	0	0	0	0	0	0	0	0
BA_0357	0.833096	0.488424	1.34183	0	0	0	0	0	0
BA_0358	0.0549909	0.257919	0.354286	0	0	0.0500903	0	0.262308	0.0656379
BA_0359	0	0	0	0.225642	0	0	0	0.217729	0
BA_0360	1.4645	2.06064	1.1794	5.20343	2.99114	0.333496	4.98546	8.51378	4.58861
BA_0361	46.449	50.6953	51.564	116.44	145.317	19.3501	396.855	330.638	236.221
BA_0362	0.125453	0.411879	1.15463	0	0.0683279	0	0	0	0
BA_0363	0.0889559	0.250333	0.327491	0	1.6473	0.48617	0.842645	0.848642	0.318537
BA_0364	12.5118	18.909	15.9938	5.02206	4.83426	2.3378	41.1526	17.981	17.8062
BA_0365	54.0188	49.1325	50.9343	0	0.0496564	0.124569	0.323861	0.0543609	0.272058
BA_0366	203.497	263.48	227.951	18.6202	29.4722	11.7968	54.4316	31.2705	33.825
BA_0367	45.1437	60.3832	63.3361	7.01461	10.8319	3.04597	20.3707	21.5651	16.1757
BA_0368	57.809	115.956	102.067	1.667	0.41981	7.54754	15.2872	23.4387	17.4804
BA_0369	0.1614	0.3028	0	0	0.0439534	0	0.334443	0.0481176	0.19265
BA_0370	0.0538417	0	0.297327	0	0.17595	0.0490435	0	0	0.128532
BA_0371	4.26411	3.33326	3.34743	0.413316	0.591997	0.190397	0.544504	1.49558	1.04788
BA_0372	9.09382	8.49052	7.70484	2.2057	0.509183	0.812858	3.97502	4.71277	4.10848
BA_0373	1.14327	2.06237	3.23765	0	0.0957973	0	1.56198	0.419493	1.04971
BA_0374	28.2194	28.2495	30.2785	0.882521	1.63622	0.538315	9.00952	4.34595	3.58581
BA_0375	12.4572	11.2383	14.4487	0.549829	1.41928	1.62101	4.06387	4.43386	4.40005
BA_0376	3.45228	4.85758	3.73344	1.06662	1.22219	1.25785	1.7373	1.23506	1.13319
BA_0377	6.65023	7.92151	9.81255	2.47864	5.86428	2.11535	7.6244	7.17515	2.89793
BA_0378	8.26497	11.3808	9.3623	1.37499	1.21195	2.26818	10.1	10.551	7.77832
BA_0379	0.120006	0.112571	0.147267	0	0.217871	0.109312	1.13677	0.0954052	0.238735
BA_0380	38.0425	34.2581	34.6132	3.22387	4.73598	0	30.3734	19.7018	7.00582
BA_0381	3.59966	4.30521	3.31304	0.444863	0.294084	0.0819718	9.05734	3.97067	4.9411
BA_0382	5.08831	6.27689	4.74731	0.947562	0.91113	0.952368	3.21881	3.57421	1.41437
BA_0383	11.888	12.6325	12.0527	0	0	0.592189	4.94871	5.09469	5.54286
BA_0384	13.3811	21.1736	22.1847	3.22943	3.4845	3.57039	16.0576	13.002	12.9065
BA_0385	43.3741	56.0973	57.7296	9.00474	8.46111	13.0235	203.561	146.892	105.308
BA_0386	0.937513	2.99005	3.62403	1.62207	2.65521	1.19555	3.10825	2.90677	1.34284
BA_0387	0	1.03907	1.6312	0.821367	0	0	0.786961	0.792562	0
BA_0388	1.94002	0.519948	2.04062	0	1.20758	0	1.31265	0.660995	0
BA_0389	0	0	0.220394	0.443906	0	0	3.40249	0.142779	1.1433
BA_0390	0.338783	0	0.311808	0.0697806	0.246025	0.102864	2.74116	0.942668	1.01094
BA_0391	4.3029	1.34543	1.65011	0	1.17179	0.653239	1.27374	0.855204	1.284
BA_0392	2.66187	9.65485	11.2696	3.28966	2.12636	2.10136	5.88347	2.53943	2.75361
BA_0393	17.6755	15.8683	16.0685	7.43776	11.1626	5.63018	37.1718	33.169	18.2502
BA_0394	22.7287	24.9484	28.4282	15.3868	20.3723	10.424	16.8752	14.5313	19.1612
BA_0395	24.8281	59.1687	43.6437	52.2453	66.0296	23.023	168.71	166.976	151.647
BA_0396	9.57296	4.74648	7.25835	0.84505	1.19175	1.20417	6.80107	4.13143	4.02645
BA_0397	4.67956	3.46105	3.80999	0	0.196056	0.491831	0.745899	0.751208	1.28898
BA_0398	0.871525	2.00665	1.89594	0.0979155	0.17261	0.360844	0.0938138	1.41722	0.0945694
BA_0399	89.5222	121.967	119.348	14.8572	19.1982	17.1168	38.282	58.0405	36.3613
BA_0400	441.919	481.021	454.64	202.559	281.953	63.1472	291.816	256.819	210.566
BA_0401	67.7768	67.9351	70.6023	89.2083	115.999	29.7291	129.9	103.409	62.5583
BA_0402	64.3748	74.0804	70.176	166.071	166.496	56.1546	272.722	227.156	214.875
BA_0403	10.4921	14.2029	13.8569	0.579808	0.836273	1.82595	9.99937	7.12058	8.34901
BA_0404	24.0451	18.8765	28.1069	27.3324	49.7934	2.75242	115.407	73.9846	48.3458
BA_0405	109.955	161.616	163.279	13.8338	19.555	23.2209	59.073	75.6737	97.7635
BA_0406	1.55276	0.29131	2.28659	0	1.69142	1.1315	4.78032	7.40668	3.33611
BA_0407	55.321	79.3167	74.2353	77.2616	106.151	43.6995	238.762	255.658	152.643
BA_0408	0.144323	3.11375	2.12529	7.31278	3.45864	1.70899	22.7282	14.629	5.85703
BA_0409	12.0075	17.2708	13.0407	17.6095	11.5974	5.03122	46.5397	25.106	22.6451
BA_0410	3.32459	1.22032	4.22395	2.14366	2.24375	1.38249	14.8905	15.1689	13.8459
BA_0411	0.14645	0.480815	0.471759	0	0	0.266797	2.341	0.611246	0.874021
BA_0412	0.716095	2.49498	1.97723	0.632131	1.11435	0.372731	4.23956	2.92782	2.80843
BA_0413	0	0	0.359016	0	0.42491	0	0.923759	0.930334	0.4656
BA_0414	28.3593	36.4304	37.5987	21.6948	42.7987	6.8136	142.042	55.2331	46.5364
BA_0415	0.117904	0	0.217032	0	0.128433	0	1.11686	0.140601	0.703661
BA_0416	1.13772	1.82954	2.09426	0.602592	1.06228	0.444142	9.23759	7.55897	3.88
BA_0417	0	0	0	0	0.508561	0	0	0	0
BA_0418	39.1295	31.3718	43.0934	0	0	0	0	0.199411	0
BA_0419	4.05351	6.01019	4.45283	0	0	0	0.154828	0.077965	0.31215
BA_0420	35.5237	41.0188	45.4678	0.107867	0	0	0.930134	0.728587	0.729265
BA_0421	22.6529	21.1914	28.5185	2.28846	2.42052	0.506014	7.52792	4.56362	2.57863
BA_0422	0	0	0	0	0	0	8.14634	10.0275	1.36866
BA_0423	89.6545	97.8802	104.293	2.77139	3.63923	6.16967	36.4156	30.3986	31.4647
BA_0424	0.533735	1.25167	2.37431	0	0.581399	0.243085	0.842645	0.10608	0.530895
BA_0425	4.53156	6.78636	6.87806	1.47377	1.55881	0.434497	10.449	8.15327	4.74468
BA_0426	13.4183	18.5965	17.132	5.48611	6.37416	3.49215	35.0022	19.0092	17.8227
BA_0427	40.1042	45.9213	52.5753	52.0102	70.8543	8.23058	116.811	69.006	48.6816
BA_0428	59.0481	103.761	71.4692	29.4896	76.2162	14.7359	563.65	211.245	195.029
BA_0429	1.77609	1.38837	1.90711	1.39015	0.773879	0.862832	7.9214	6.07159	4.59326
BA_0430	19.5778	11.7222	9.96788	12.3549	6.35245	13.6593	35.5122	46.6931	26.8487
BA_0431	0	0	0	0	0	0	1.22938	0	0
BA_0432	1.83599	1.91359	3.7551	2.52111	4.88875	0.929094	6.52185	8.51442	4.38292
BA_0433	0.629534	0	0	0	0	0	0	0.375361	0
BA_0434	0.0951621	0.178532	0.700678	0	0.10366	0	2.14091	1.92918	1.02228
BA_0435	0	0.186439	0	0	0	0	1.88271	0	1.18617
BA_0436	0	1.36657	0	0	0	0	0.431249	0	0
BA_0437	0	0	0	0	0	0	0	0	0
BA_0438	0.655376	0.175649	0.689362	0	0	0	0.110859	1.33978	1.00577
BA_0439	0.346518	0.975145	0.318927	0	0.0943657	0	0	0	0
BA_0440	0	0	0	0	0	0	0	0	0
BA_0441	0.402101	0	0	0	0	0	0.476119	0	0
BA_0442	1.83942	0	1.07733	0	0	0	0	0	0
BA_0443	0.149921	1.12506	1.10387	0	0	0	0	0	0.715793
BA_0444	0.777246	0	0	0	0	0	0	0	0.927732
BA_0445	2.39874	3.60019	6.62322	0	0	0.873989	0	0	0
BA_0446	0	0.435749	0.748199	0	0	0	0	0.276978	0
BA_0447	0	0	0	0	0	0	0	0	0
BA_0448	3.38417	1.41089	6.22941	0	0	1.02753	0.445235	0	0
BA_0449	0	0	0	0	0	0	0	0	0
BA_0450	5.16561	3.71493	5.22972	0	0	0	0.203882	0.410667	0.616574
BA_0452	0	0	0	0	0	0	0	0	0
BA_0453	0.743995	0	0.855942	0	0	0.169423	0	0.221804	0
BA_0454	0.781612	0.549889	2.15813	0	0	0	0	0.466038	0
BA_0455	0	0	0.842427	0	0	0	0.541898	1.09151	0
BA_0456	0	0	0	0	0	0	0	0	0
BA_0457	0	0.270761	0	0	0	0	0	0.172105	0
BA_0458	1.15511	0.120394	0.354379	0	0	0	0	0	0
BA_0459	0	0	0	0	0	0	0	0	0
BA_0460	0	0	0	0	0	0	0	0	0
BA_0461	0	0.864284	0.636005	0	0	0	0	0.274685	0.549881
BA_0462	0	0	0	0	0	0	0	0	0
BA_0463	0	0	0	0	0	0	0	0	0
BA_0464	0	0	1.03544	0	0	0	1.77614	2.90677	0.447612
BA_0465	0.288474	0.386573	0.113788	0.05093	0.0448908	0	0.0975931	0.0491438	0.0983791
BA_0466	0.0720865	0.608581	0.19904	0	0	0	0	0	0
BA_0467	0.589521	0.110599	0.108516	0	0	0	0	0.281203	0
BA_0468	0.0584567	1.15153	0.430417	0.433461	0	0.159742	0.415304	0.27884	0.279099
BA_0469	0	0	0	0	0	0	0	0	0
BA_0470	0	0	0	0	0	0	0.302826	0	0
BA_0471	0	0	0	0	0	0	0	0	0
BA_0472	0	0	0	0.241488	0	0	0	0	0
BA_0473	0	0	0	0	0	0	0	0	0.504754
BA_0474	1.1003	0.114681	1.91286	0.151089	0	0	0.14476	0	0
BA_0475	0	0	0	0	0	0.525118	0.455075	0	0.45874
BA_0476	0	0	0	0	0	0	0	0	0
BA_0477	0.883907	0.696479	1.69213	0.240322	0.0577705	0.0483082	1.13034	0.484869	0.337614
BA_0478	1.63375	3.06506	2.61163	1.48773	0.842992	0.156648	2.6472	1.33302	1.95007
BA_0479	0.816564	2.17025	2.39779	0.456519	1.01655	0.531282	4.78833	3.24586	3.06323
BA_0480	0	0	0	0	0.941312	0	1.53482	0	1.03145
BA_0481	0.212863	1.35778	1.25385	0.157839	0	0	0.655319	0.863055	0.304891
BA_0482	0	0	0	0	0	0	0	0	0.173344
BA_0483	0	0.546054	0	0	0	0	0	0	0
BA_0484	0	0	0	0	0	0	0	0	0
BA_0485	0.610972	0.818739	1.20498	0	0	0.159007	0.103348	0.208168	0
BA_0486	0.921371	0	0	1.13867	2.0073	0	4.63664	5.4937	5.22387
BA_0487	18.1224	20.4526	19.5461	13.2979	27.966	6.79209	58.8985	44.5727	35.0379
BA_0488	1.37071	4.82168	5.99244	5.50545	16.4243	12.7977	131.871	146.295	69.1251
BA_0489	17.5024	20.976	26.9241	2.38975	5.0229	11.5167	13.5617	17.3833	14.4995
BA_0490	0	0	0	0	0	0	0	0	0
BA_0492	0.734309	1.88275	1.66707	1.02849	1.22649	0.267548	3.8257	3.1524	2.16199
BA_0493	2.06517	3.9254	4.80184	0.738803	1.0656	0.0990066	5.40544	2.13868	2.72449
BA_0494	7.03092	10.4925	11.5695	0	0	0	0.252277	0	0
BA_0495	2.27704	3.63112	2.51487	0	0	0	0	0	0
BA_0496	0	0	0	0	0	0	0	0	0
BA_0497	3.67197	1.91359	3.56735	0.504221	0	0	0	0	0.486991
BA_0498	0	0	0	0	0.997048	0	0	0	0
BA_0499	2.39616	5.05732	3.30805	2.22096	1.7129	0.0682069	7.97973	2.76814	2.05569
BA_0500	0	0	0	0	0	0	0	0	0
BA_0501	40.536	48.3391	48.7152	18.3686	21.3674	10.8649	164.241	140.462	117.735
BA_0502	0.618093	0.896049	2.27551	0.902752	1.04054	0.56301	7.25216	3.7524	1.94501
BA_0503	0	0.325454	0.957972	0	0.944833	0	0.616224	0.62061	0.828249
BA_0504	0	0	0	0	0	0	0	0	0
BA_0505	0	0.534864	0.484422	0	0	0	0.10387	0	0.157059
BA_0506	0.167893	0.997438	0.566588	0	0	0	0.596393	0.600638	0.133599
BA_0507	0.288346	0.608581	0.464426	0.178176	0	0.0656624	0.170712	0.773672	0.516261
BA_0508	0.856028	1.05656	1.6172	0	0	0.082078	1.06695	0.644726	0.752881
BA_0509	10510.8	12790.6	13170.2	338.031	616.481	130.673	255.493	450.811	608.581
BA_0510	5534.44	6847.06	6647.69	613.549	1194.68	118.06	284.177	525.872	513.526
BA_0511	4.65348	9.23398	7.90697	2.94922	9.03329	1.41292	19.0733	14.9404	10.6816
BA_0512	9.93764	4.93513	6.45625	0	0	0	0.692173	0	0
BA_0513	21.6059	17.6899	15.8624	77.9439	59.9947	11.0347	138.858	80.7208	58.1373
BA_0514	77.4433	81.076	84.195	0.836874	0.804697	0.61682	4.15487	4.18445	4.84966
BA_0515	19.3702	14.4928	18.3938	13.3942	19.1742	2.94066	32.6744	30.5237	15.9642
BA_0516	0.428347	0.803614	1.41926	0.741119	1.49312	0.312139	6.39066	4.49509	1.94287
BA_0517	6.03927	8.81236	5.5584	4.42288	3.89843	0	15.3613	12.5366	5.87364
BA_0518	289.695	145.962	260.31	0.565591	0	0	0	1.09151	2.18505
BA_0519	1074.27	754.132	1092.47	0.544112	0	0.802079	2.08528	0.52503	0
BA_0520	0	0.245314	2.40693	0	0	0	1.23863	1.24744	0
BA_0521	51.8887	77.5051	65.0045	47.0202	67.8888	19.5265	179.782	142.547	104.468
BA_0522	1.20484	1.36812	1.1089	0.862049	0.759829	0.115523	1.05119	0.756197	0.37845
BA_0523	0	2.501	2.90006	0	0.528053	0	1.43499	0.867123	0
BA_0524	3503.62	2468.26	3433.9	29.056	33.5314	10.8183	36.7358	23.4123	25.17
BA_0526	0.267552	0	0.246248	0	0	0	0	0	0
BA_0527	53.4195	83.8445	73.3262	23.0334	30.3103	4.42354	52.6848	30.9907	26.4762
BA_0528	1.89719	1.70549	1.01857	0.439618	0.258326	0.540036	2.15281	1.5554	0.849191
BA_0529	5.49859	8.39658	11.3573	5.05704	7.66114	5.47448	51.6317	37.0552	22.5133
BA_0530	126.064	94.4822	127.197	52.2873	72.2397	73.6773	62.8162	96.4191	80.4115
BA_0531	30.9942	34.4282	34.3199	11.4055	12.145	2.91553	17.3075	17.9396	12.2892
BA_0532	0.480695	0.0644161	0.379217	0	0	0.187653	0	0.0818902	0
BA_0533	0.351775	0.0824949	0.242824	0.108685	0.191595	0	0.93719	0.31462	0.104971
BA_0534	0.531695	0.166251	0.407799	0	0	0	0.104928	0	0.105773
BA_0535	10.159	29.2348	25.1977	0	0	0	0.203882	0	0.205525
BA_0536	45.1016	43.1677	47.2796	0	1.6654	0.974834	1.8103	1.45855	3.28478
BA_0537	5.77025	5.41273	7.22857	35.6557	46.6177	11.242	342.949	253.07	260.192
BA_0538	24.0346	35.5595	42.0835	71.239	105.362	21.3587	393.796	294.769	273.352
BA_0539	0	0	0	0	0	0	0	0	0
BA_0540	3.69556	8.56452	7.00268	2.68655	2.60479	2.57417	29.3438	18.1464	12.4548
BA_0541	26.6063	35.2133	29.8306	35.5119	42.1561	7.75529	80.9938	53.6495	45.1537
BA_0542	1.54899	2.11347	1.29604	0	0.153392	0	0	0	0
BA_0543	1.34465	0.672716	1.4026	0.332357	1.07414	0	2.44134	1.17591	0.642
BA_0544	9.80068	17.2877	12.7461	16.5883	25.0651	1.3585	30.3994	19.1825	15.1314
BA_0545	5.17767	6.17108	6.61549	0.15056	0.19906	0.110971	1.58678	1.74336	0.799783
BA_0546	2.03907	3.23692	4.40304	0.193844	0	0.357183	1.76438	4.30205	2.34025
BA_0547	11.689	13.639	10.1022	11.2747	18.1675	9.21897	113.932	70.2056	67.2083
BA_0548	0.94141	0.441541	1.23779	0.415514	0.952231	0.826889	15.6855	8.01883	4.65525
BA_0549	0	0	0	0	0	0	0	0.873209	0
BA_0550	1215.51	1046.6	1265.96	1.04343	3.39891	0.13375	2.12985	1.57592	0.701062
BA_0551	17.8793	18.6597	23.0488	1.17065	0.12898	0	0.911312	0.423599	0.423993
BA_0552	0.0649721	0.121893	0.318927	0.0802955	0.0943657	0.059182	0.230796	0.129133	0.103402
BA_0553	0.401637	1.65771	0.961106	0.397089	0.787507	0.731688	1.90228	0.670535	0.38352
BA_0554	12.8805	14.1453	11.194	2.21857	3.911	1.18552	36.8267	19.9092	27.2666
BA_0555	0.0240123	0.180196	0.287303	0.0593509	0	0	0.284324	0.143174	0.0859841
BA_0556	4.69681	8.45437	8.99614	3.45134	6.77556	4.97201	99.3533	94.6109	73.7894
BA_0557	20.2527	25.1102	32.9442	14.6366	22.3011	12.9536	78.7714	117.764	81.8758
BA_0558	0.352042	0.363253	0.453615	0	0.345132	0.160334	1.12548	1.59529	2.14303
BA_0559	0.518486	0.0810602	0.715802	0.0533974	0	0.0787133	1.89294	1.33964	0.618872
BA_0560	0.604025	4.06064	2.77964	0.248827	0.109661	0.275098	1.07282	0.960403	0.720972
BA_0561	2.13385	2.15176	0.981971	0.197783	0.581102	0.194369	1.76865	1.78124	1.40085
BA_0562	0	0	0	0	0	0	0	0	0
BA_0563	3.73402	8.43236	6.10969	67.3401	72.9133	12.3453	376.472	396.303	206.507
BA_0564	0.334977	3.14222	3.59688	0	0.973042	0.406833	1.71877	1.19838	0.533111
BA_0565	0.491615	0.807022	1.80988	0	0	0.335853	0.145528	0.87938	0
BA_0566	0.492485	0.635211	1.52979	0	0	0.112149	0.0728925	0.0734113	0
BA_0567	1.19422	0.700144	1.03044	0	0.406522	0	0.883783	0.0890073	0.445451
BA_0568	2.28772	2.14597	1.94959	0.209427	0.27689	0.385896	1.40458	0.505206	0.303405
BA_0569	2.88163	3.79381	5.07171	0.374868	0.220278	0.230248	2.81346	0.904304	0.663773
BA_0570	1.38336	2.03917	2.9102	0.732697	0.215272	0.180012	3.15902	1.0605	0.589716
BA_0571	0.207343	0.875233	0.572499	0.384366	1.24222	0.37773	0.736529	0.989029	1.23744
BA_0572	0.389556	0.0522028	0.563415	0.0687758	0	0.152074	1.12021	0.464547	0.398554
BA_0573	0	0	0	0	0	0	0	0	0
BA_0574	0.279746	0	0.171647	0	0.101576	0	0	0	0
BA_0575	1.01783	0.131692	0.678362	0.0433753	0	0.0319698	0.124675	0.167416	0.125679
BA_0576	0	0.24409	0	0	0	0	0.205408	0.41374	0
BA_0577	0	0.276889	0	0.364794	0.643075	0	0.932034	0.704001	0.587213
BA_0578	0.103363	0	0.0475665	0	0	0	0.12239	0.0616306	0
BA_0579	0.406125	0.653079	0.747575	0.0717012	0	0.0528476	0	0.0691867	0.069251
BA_0580	4.64642	2.49059	4.52081	0	0	0.120924	0.314384	0	0
BA_0581	3.53076	5.84885	4.28674	0.37136	1.39113	0.136856	11.2078	3.22503	3.04869
BA_0582	0.198753	1.21185	0.868904	0.122814	0.270627	0	0.353008	0.474027	0.355851
BA_0583	0	0	0	0	0	0	0.482628	0.162021	0.486515
BA_0584	1.85439	1.11506	0.656437	0.411339	1.45025	0.173245	4.39149	2.43818	1.64588
BA_0585	4.56154	5.83488	6.48832	6.02173	8.01799	1.32205	11.6617	5.56329	5.19723
BA_0586	0	0	0	0	0	0	0	0	0
BA_0587	0.549909	1.28959	2.78367	0.849504	0	0	0.488351	0.491827	0.656379
BA_0588	1.38091	1.70015	1.19152	1.38661	2.91445	1.10062	6.33604	5.96945	2.9875
BA_0589	178.031	183.559	211.176	8.433	8.90415	19.4884	36.5272	52.0163	55.8543
BA_0590	63.7906	77.3023	90.0593	11.9502	16.0355	10.254	49.5578	54.9016	40.9992
BA_0591	1.81964	3.69829	2.40746	0.937	0.825893	0.483433	12.2992	5.24401	4.93215
BA_0592	38.0665	31.0429	34.8659	17.5278	16.9876	9.33965	15.6304	19.4757	23.4512
BA_0593	3.39214	4.98048	4.61519	1.03285	0.64262	0.223902	9.83766	4.51415	4.81175
BA_0594	3.87489	7.09653	4.41548	4.10466	3.81893	0.504224	7.42846	9.02161	5.28585
BA_0595	23.4916	27.8279	34.0688	5.74101	11.946	4.01717	29.5218	27.2426	29.1279
BA_0596	32.6658	30.9541	36.1916	3.87833	5.8528	2.07893	13.3434	8.22177	11.2374
BA_0597	9.60064	11.2187	9.84604	48.6122	72.7279	4.2476	401.449	262.734	169.207
BA_0598	1.06204	0	0.488737	21.6565	5.20596	1.45109	8.17398	3.16621	6.97215
BA_0599	2150.53	1096.07	1944.57	12430.7	11759.5	7717.54	16384.1	16958.5	13285.9
BA_0600	2.41187	2.97689	2.80399	2.03943	5.39279	1.38754	20.8927	10.1423	4.54555
BA_0602	3.35731	7.93623	6.30357	0	0.438855	0.122325	0.159013	0.480433	0
BA_0603	0	0	0	0	0	0	0	0	0
BA_0604	9.37068	1.39607	6.6967	6.94843	4.02295	1.55649	35.5059	28.9224	9.40854
BA_0605	0.555952	1.04301	0.127921	0	0	0	0	0.248616	0
BA_0606	0.708627	1.16326	0.923953	0	0	0.107579	0.139845	0.21126	0.0704855
BA_0607	0.540649	0.16905	0.663466	0	0	0	0.85356	0.429818	0
BA_0608	1.79519	2.28538	3.83557	0	0	0.0584002	0.53141	0.76456	0.53569
BA_0609	18.7865	20.1726	18.8991	0.719914	1.79789	0.884358	7.70229	6.71511	6.7793
BA_0610	244.869	290.477	271.204	97.7581	210.009	131.582	1787.23	1518.4	1468.47
BA_0612	12.3615	24.7827	17.8466	20.3691	40.9241	0.441562	124.27	66.1904	75.2206
BA_0613	0	0	0.715357	0	1.69331	0.35399	4.60159	0	0.463866
BA_0614	9.27172	8.93751	9.42923	0.316531	0.613794	0.27996	7.52113	5.49774	4.76914
BA_0615	7.92952	6.96488	7.49717	0.267263	0.39262	0	0.42678	0.687708	0.602305
BA_0616	1.87073	4.09459	3.37978	0.256882	0.830211	0.315559	6.48119	2.97447	1.32322
BA_0617	3.419	5.79757	6.5961	0.893826	1.14594	1.01814	1.63491	1.0977	1.41264
BA_0618	30.5876	39.0249	36.1064	9.3195	12.8293	1.15769	35.8168	13.0343	12.2374
BA_0619	10.8485	18.7459	13.4881	0.588028	2.07321	1.82031	3.49306	3.51792	2.27174
BA_0620	79.0335	77.4816	97.8122	5.12929	9.61523	4.04679	9.82885	11.4324	12.8386
BA_0621	313.583	333.594	344.308	26.7923	20.9914	18.8164	58.6001	49.268	44.7833
BA_0622	0.989055	1.54629	0.151717	0.40744	0.359126	0	0.195186	0.196575	0.196758
BA_0623	3.62618	4.1304	2.79256	0.137186	0.403062	0.269635	1.6649	0.750123	1.14831
BA_0624	4.36233	2.33831	3.44141	0	0.0848551	0	0.737904	1.39342	0.650867
BA_0625	3.23022	7.08442	5.44355	1.57433	0.991179	1.61622	7.81128	5.37117	6.95101
BA_0626	0.378063	1.41855	1.21786	0	0	0	0.223828	0	0.22563
BA_0627	8.02656	8.30148	8.14513	4.57827	6.27727	7.49872	9.50406	10.7988	6.63273
BA_0628	0	0	0	0.100963	0.0889908	0	0.725501	0.243555	0.828857
BA_0629	2.34036	1.82168	1.74154	1.29232	0.542417	0.771075	3.12493	1.72204	1.42646
BA_0630	2.35144	3.03291	3.24631	2.90602	2.13453	0.356982	14.3855	9.23018	6.549
BA_0631	3.65611	5.1215	3.27525	1.38564	0.902723	1.24331	4.0405	4.47619	3.60756
BA_0632	2.51283	4.00714	3.43057	3.36426	2.50913	1.56408	14.2818	12.0861	9.24799
BA_0633	1.98046	4.87659	4.78475	0.229457	0	0	1.46563	0.738032	0.664847
BA_0634	3.33351	1.23899	2.72075	0.0777303	0	0.114583	0.893691	0.150009	1.80178
BA_0635	13.6163	14.9449	16.1127	0.171711	0.201799	0.379679	1.2613	1.32551	1.1609
BA_0636	0.202809	0.380487	0.27999	0	0.33138	0.0923677	2.0412	2.17666	0.484152
BA_0637	10.0297	12.634	9.95643	1.94782	2.49724	1.89244	13.3181	11.0208	6.84094
BA_0638	5.24109	5.67616	7.80572	1.7665	1.71274	4.81742	66.1205	69.9434	62.1602
BA_0639	22.3631	25.7086	33.2822	0	0	0.173363	0.112679	0	0
BA_0640	128.567	107.393	169.009	0.414312	0.45648	0.534397	1.58783	1.89897	1.00039
BA_0641	9.75586	15.6171	15.5181	0	0	0	1.6323	0	0.632866
BA_0642	51.5245	89.3689	72.8726	0.40048	0.352992	0.295175	2.43013	3.47792	3.09436
BA_0643	2.68114	3.74967	3.94825	4.2774	2.28336	2.26459	17.1433	11.3358	9.36801
BA_0644	5.35104	1.73086	4.24566	10.7177	9.04484	3.69765	297.794	159.088	54.8407
BA_0645	0	1.65389	0	0	0	0	0.189789	0	0
BA_0646	1.37379	1.17152	1.60923	0	0.136042	0	0	0	0
BA_0647	6.62089	8.52932	7.63744	0.109099	0.769296	0.643292	0.104529	0.42109	0.105371
BA_0648	0.729942	0.684716	0.470274	0.541258	0.238538	0	0.605016	0.348184	0
BA_0649	2.67038	1.50296	1.72043	0.990055	2.18164	0.851343	7.11437	2.54756	3.02804
BA_0650	1.30025	1.12587	1.28878	0.309021	0.87161	0.865507	3.4937	2.74329	2.44738
BA_0651	2.05505	2.40965	1.79685	1.14288	3.24593	1.68472	4.38001	1.22533	1.10382
BA_0652	0.278032	0.365127	1.48418	0	0	0.151952	0.658422	0	0
BA_0653	0.335592	0.584628	0.39712	0.41474	1.09668	0.0873387	1.93007	1.48644	1.03003
BA_0654	0	0	0.45515	0.611159	1.97519	0	0.975931	0.786301	0.787033
BA_0655	0	0	0	0	0	0	0	0	0
BA_0656	326.335	253.503	381.774	32.0516	37.8665	7.89829	152.157	96.4158	86.6684
BA_0657	34.8971	59.7736	54.1909	0.569965	0.58611	1.26028	20.7514	13.1994	16.1477
BA_0658	36.7939	68.3543	46.6294	2.66435	1.87874	2.35652	22.4642	17.4822	16.898
BA_0659	103.819	164.402	138.351	11.7907	9.73791	13.8224	84.8592	55.3629	53.9798
BA_0660	55.6918	79.8682	70.5653	0.760047	0.372179	1.36936	5.17838	4.56333	4.7307
BA_0661	0.876634	1.06418	0.949214	0.127457	0.280859	0.140914	0.976943	0.922403	0.677058
BA_0662	0.759427	0.28495	0.97854	0.187707	0.165449	0.2767	1.79844	1.26787	0.362585
BA_0663	11.0432	10.0327	11.3643	1.02089	2.36799	2.05934	7.72205	7.93255	5.60466
BA_0664	80.3097	126.34	104.246	19.0355	21.4607	5.74259	155.067	73.899	86.4524
BA_0665	368.236	460.925	476.397	42.8889	44.6535	17.1847	81.4493	59.0683	69.4095
BA_0666	29.4104	35.6829	46.6811	0.87058	0.767348	3.36873	8.34112	12.1807	6.30623
BA_0667	188.795	249.038	249.494	9.04036	5.53218	14.0055	48.6046	40.6162	30.2541
BA_0668	297.747	394.312	388.94	8.36711	6.72661	12.5373	60.2568	56.7819	71.8426
BA_0669	186.379	215.21	253.678	5.47755	5.97367	7.32178	36.0251	40.0441	40.5296
BA_0670	1025.61	957.118	1166.39	903.812	1421.58	172.856	1462.26	1089.69	557.61
BA_0672	6.58229	10.2545	10.1948	0.82422	1.01076	2.87899	6.11155	5.32515	7.96055
BA_0673	0	0	0	0	0	0	0.72465	0	0.243496
BA_0674	23.9792	54.8419	38.6223	7.92213	9.18101	3.13577	17.2187	12.9528	17.0031
BA_0675	15.2749	20.7794	19.1708	1.55269	6.62677	1.8672	5.01101	7.64887	2.92033
BA_0676	0	0	0	0	0	0	0.478887	0	0
BA_0677	0.326973	0.153357	0.150469	0	0	0.0744585	1.45185	0.194958	0.19514
BA_0678	0.068468	0.192678	0.252065	0	0	0.187099	0.162143	0.326594	0
BA_0679	3.38321	1.78166	2.18514	0.220059	0.38793	0.43252	0.491962	0.920147	0.99185
BA_0680	7.0994	6.65953	10.5814	1.70237	2.30847	1.68907	7.15157	10.9932	3.66783
BA_0681	0	0	0.0556251	0	0	0	0.715626	0.648648	0.72139
BA_0682	0	0	0	0	0	0	0	0	0
BA_0683	0.428347	0.723253	0.0788479	1.58811	2.05303	0.234104	11.0569	5.5167	5.72634
BA_0684	1.54749	0.62212	1.62774	2.82316	4.65571	0.0671231	3.6647	3.95441	2.55077
BA_0685	22.8755	33.6091	33.4327	8.58335	18.6737	6.27617	23.7577	21.1002	19.2118
BA_0686	4.78648	10.7758	5.87381	9.0702	5.90911	2.03463	30.9827	15.6016	3.80881
BA_0687	5.88275	7.72557	5.95577	15.2674	15.3794	12.4585	99.4343	84.884	88.2983
BA_0688	0.694643	2.88567	2.00933	4.53763	7.89104	0.723129	11.3976	13.0172	9.23894
BA_0689	10.3466	9.18731	10.9558	0.372432	0.382981	0	1.4868	1.1979	1.19902
BA_0690	0.106939	0	0.0984235	0.13216	0	0.146113	0.37987	0.127525	0.0638217
BA_0691	21.2207	30.2949	24.0324	49.254	43.1494	13.0705	235.906	160.848	75.5538
BA_0692	6.56514	11.0091	14.8163	1.00029	0.881682	1.22878	6.44253	6.81012	4.5622
BA_0693	1.0502	4.12818	3.22194	3.46104	2.56036	2.77873	20.3701	10.2575	9.2523
BA_0694	1.02299	3.38389	1.83352	0	0.351899	0	10.9017	4.62287	5.5269
BA_0695	0	0	0.320122	0	0	0.316821	0	0	0
BA_0696	0	1.21969	0.59836	0	0.177046	0.148047	5.7735	4.26403	1.358
BA_0697	1.59184	2.53846	3.95575	3.73782	6.06899	4.49494	33.3621	30.3725	15.2004
BA_0698	0	4.64146	2.67885	0.719412	0.951159	0.265122	14.4748	10.4127	5.21121
BA_0699	2.28202	2.67578	3.22048	2.35019	2.94154	0.83146	15.0416	11.2935	6.44644
BA_0700	279.372	310.531	302.624	119.694	94.5368	68.0503	60.9156	82.1546	73.6875
BA_0701	608.392	790.521	707.034	58.8364	67.7198	90.9413	47.8887	88.329	97.3764
BA_0702	340.372	523.107	438.075	22.6704	13.87	46.3928	30.7072	62.452	83.2466
BA_0703	162.659	287.115	226.244	30.6544	22.5162	16.873	32.1943	46.5495	60.4473
BA_0704	0	0	0	0	0	0	0	0	0
BA_0705	2.84133	0.73525	1.71333	0.484337	3.20179	0.356982	15.5456	8.64599	9.70655
BA_0706	3.78899	4.60939	4.79502	2.48764	1.35429	0.970686	3.43494	3.52999	2.19063
BA_0707	0	0	0	0.436395	0.384648	0	0.418114	2.52654	2.95038
BA_0708	8.93173	12.5453	8.65548	41.3496	43.8593	12.053	87.9083	64.5267	62.6124
BA_0709	1.50172	2.36294	2.36302	0.119735	0	0.088251	0.516237	0.57768	0.404752
BA_0710	0.680782	2.26413	1.42403	0	0	0	0.659535	0.442819	0.0738719
BA_0711	1.67048	1.73487	4.11821	0	0	0	0.070642	0.284579	0
BA_0712	0	0	0	0	0	0	0	0	0
BA_0713	5.3332	8.85583	8.26221	0.20469	0.288669	0.271561	1.80426	1.89611	1.30479
BA_0714	0.270675	0.507809	0	0	0	0	0.3205	0.322781	0
BA_0715	0.464273	0.362922	1.42435	1.05191	0.252866	0.563864	1.19109	1.56867	0.554162
BA_0716	1.95403	2.05292	1.43875	0	0.595988	0.569566	0.925489	0.559246	0.466472
BA_0717	8.54421	4.18473	3.82755	0.841009	1.15311	0.619867	6.26717	3.42639	3.79059
BA_0718	0	0	0	0	0.14461	0	0	0	0
BA_0719	10.4208	10.0538	11.9678	2.37236	4.10742	3.43466	14.9638	11.9363	10.2835
BA_0720	9.62932	7.78681	4.58409	0	0.361698	0.302455	2.359	1.38588	0.198167
BA_0721	0.543937	0.0566928	0.890002	0.149383	0.131669	0.110103	1.07344	0.288288	0.360695
BA_0722	0	0	0	0	0	0	0.53141	0	0
BA_0723	0	0	0	0	0	0	21.8326	9.99456	7.0027
BA_0724	0.539717	1.96885	2.09735	0.370559	0.522591	0.491619	5.60958	3.07505	4.00844
BA_0725	151.138	155.951	168.951	32.5324	36.743	18.4167	70.754	70.064	61.8857
BA_0726	430.012	499.376	509.119	21.349	27.4168	43.399	53.556	69.9966	68.288
BA_0727	311.463	376.596	370.95	55.2173	67.8152	38.6758	101.975	86.0435	69.6718
BA_0728	157.126	184.874	186.509	12.1096	8.55409	9.62174	38.8391	40.9387	28.3686
BA_0729	91.5546	98.3012	118.962	1.10929	0.855531	6.43862	14.0824	22.8795	14.8654
BA_0730	521.444	511.319	572.179	14.1087	17.3553	20.2834	58.527	60.664	67.1593
BA_0731	76.4171	88.719	90.202	38.9617	42.5538	4.68208	22.7224	28.1965	16.361
BA_0732	765.289	708.975	837.058	78.4893	161.688	26.0863	146.231	132.297	116.784
BA_0733	648.122	593.749	704.269	43.7864	58.1517	27.4226	118.743	116.088	118.314
BA_0734	442.225	405.423	488.068	25.0922	38.0745	25.4393	121.626	95.4185	97.0411
BA_0735	23.0154	18.1933	19.9928	2.87631	5.07049	2.11999	29.0893	17.2694	13.5814
BA_0736	61.0557	46.9449	40.0729	7.11261	15.2642	3.87479	35.5548	28.6463	24.7901
BA_0737	0	0	0	0	0	0	0	0	0
BA_0739	4.79892	5.63677	6.29875	0.464144	0.545476	0.912262	0.741169	0.34834	0.348665
BA_0740	4.5599	8.49232	6.49435	0.658142	0.253794	0.485085	0.669983	0.833517	0.913749
BA_0741	4.6695	6.4018	4.73847	3.99515	2.34761	0.545303	2.26832	1.14223	1.00039
BA_0742	0	0.961273	0.221922	0.0744972	0	0.0549083	0.285506	0.287538	0
BA_0743	0.235609	0	0.27106	0	0	0	0.348724	0.421447	0.140613
BA_0744	0	0	0	0	0	0	0	0	0.184926
BA_0745	15.4767	10.2388	11.9202	6.24136	5.23508	1.55814	11.574	6.50816	7.09758
BA_0746	0	0.415627	0	0	0	0	0.786961	0	0
BA_0747	7.4857	8.2758	7.62782	2.57711	1.9803	0.194817	5.3815	4.71841	5.04191
BA_0748	10.5229	6.85689	10.2765	0	0	0.146338	0.0951138	0.478954	0.28764
BA_0749	8.37071	6.90441	10.6265	0	0	0	0.170889	0.516316	0.689062
BA_0750	0	0.464437	0	0	0.269664	0	1.75876	0.885638	1.47744
BA_0751	12.7487	10.399	10.4582	0	0	0	0	0	0.330805
BA_0752	32.0835	46.045	37.5574	8.03968	8.77741	2.82816	56.1086	38.0834	34.0599
BA_0753	5.6594	8.40553	7.07525	0.874269	2.26043	0.902134	14.8543	12.3729	10.1327
BA_0754	14.2059	18.8742	17.7277	2.43664	2.58827	2.02618	10.7151	9.76648	9.41351
BA_0755	3.24536	2.11776	2.98694	0.871904	0.230555	0.192792	3.34152	1.93505	2.77896
BA_0756	334.875	247.963	332.63	231.119	238.253	30.9453	424.102	246.935	173.402
BA_0757	127.671	135.802	161.666	67.9141	98.5626	19.2059	311.192	173.631	167.055
BA_0758	12.7837	21.6473	20.934	1.64143	2.17019	2.57086	11.5984	6.73142	16.0515
BA_0759	50.7701	26.8381	45.4367	24.959	26.277	5.11002	15.278	11.0383	8.37016
BA_0760	139.264	149.865	174.086	30.233	34.5382	31.7444	32.203	41.8848	46.4914
BA_0761	1.63236	0.942288	1.38681	0	0	0	0.297359	0	0
BA_0762	4.89391	11.4767	7.72155	0	0	0	0	0.0833717	0
BA_0763	11.463	19.4243	17.6971	0.0571228	0	0	0.0547299	0.220478	0.110341
BA_0764	0	0.799022	2.61324	0	0	0	0	0	0
BA_0765	10.111	11.3814	23.6369	0	0.660834	0	0.478887	0	0.241372
BA_0766	15.4033	21.557	20.3506	19.3432	23.9505	4.07341	15.7383	10.3694	7.85838
BA_0767	41.7479	36.7683	50.5694	0	0	0	0	0.292506	0.0585557
BA_0768	1.98438	1.13754	1.26831	0	0.120088	0	0.587414	0.262931	0.263176
BA_0770	0	0	0	0	0	0	0	0	0
BA_0771	0	0	0.109631	0	0	0	0	0	0
BA_0772	1.66762	2.45818	1.20594	0	0.259506	0.217001	1.41042	0.426138	0.995246
BA_0773	0	0	0	0	0	0	0	0	0
BA_0774	3.59523	5.17636	5.69449	0.516645	0.591997	0.0761589	0.594004	0.797642	0.548889
BA_0775	19.3085	27.5404	20.6923	51.6472	87.5886	6.26414	44.4727	48.5743	27.4669
BA_0776	0.496882	0.116524	0.228659	0	0	0	0	0	0
BA_0777	0.0615606	0	0	0	0	0	0	0	0
BA_0778	0	0	0	0	0	0	0	0	0
BA_0779	0	0	0	0	0	0	0	1.49918	0
BA_0780	0	1.01471	0	0	0	0	0.197054	0	0
BA_0781	0.910517	1.96444	2.26265	0.112526	0.297548	0.0829374	1.40156	1.62869	0.760764
BA_0782	5.53346	5.48722	5.82041	40.2495	77.1534	26.6418	138.716	100.677	52.4611
BA_0783	1.91939	4.41934	3.80078	8.26632	17.9302	5.13907	367.077	169.239	85.323
BA_0784	1.25465	0.849995	1.60382	0.258426	0.30371	0.952368	6.85029	7.97962	5.90708
BA_0785	17.1912	17.0724	17.099	9.8177	5.35695	1.45489	25.5815	12.982	11.4389
BA_0787	2.32072	5.22463	4.69904	3.94357	7.01509	1.1098	21.4337	11.7617	6.37109
BA_0789	31.1373	34.6059	34.2484	14.697	28.6248	3.61083	58.8996	45.2134	36.4791
BA_0790	0.215145	0.739988	0.165012	0.0443143	0.156238	0.130648	1.14637	0.726923	1.284
BA_0791	0	1.01958	0	0	0	0	0	0	0.259475
BA_0792	0	0.427891	0.419833	0	0	0	0	0.543966	0.544472
BA_0793	1.75236	1.49435	1.27072	0	0.347064	0.145109	0.943151	0.569918	0.19015
BA_0794	1.25114	5.16394	2.99395	0	0	0	0.888869	0.298399	0.298676
BA_0795	5.83436	5.53301	6.01889	0.15847	0	0.525602	1.21465	1.29975	1.22443
BA_0796	5.15729	6.46909	7.50632	7.18885	10.6478	5.18931	12.0712	11.5136	11.2379
BA_0797	37.5347	22.0473	47.1329	0.292663	1.87021	2.04923	7.9214	2.2592	3.74527
BA_0798	98.9783	45.8904	102.876	0.382655	0.562134	1.97426	5.98822	4.06159	3.20301
BA_0799	40.1908	21.0628	36.5854	0.310921	1.64432	0.802079	1.48948	1.05006	1.50148
BA_0800	11.6571	13.9575	12.0373	21.3167	39.1267	5.52494	48.0296	37.5218	27.0363
BA_0801	2.11925	3.55738	1.67675	1.01087	1.539	0.643463	20.6472	9.26646	6.34611
BA_0802	0.10572	0.396678	0.973016	0.261306	0.287901	0.240746	6.38419	1.26071	1.57736
BA_0803	350.385	319.272	367.269	0	0	0.222721	1.73712	0.583162	0.291852
BA_0804	21.7544	26.5759	26.0754	0	0	0	0.299522	0	0
BA_0805	40.7674	39.4556	55.0908	0	0	0	0	0	0
BA_0806	1.35639	1.27235	1.78341	0	0	0	0	0	0
BA_0807	0.625089	0.418828	1.56157	0	0	0.162681	0.105736	0	0.213176
BA_0808	0.685355	0.160723	1.26157	0	0	0	0.405756	0.102161	0
BA_0809	4.20847	0.464437	1.13923	5.8129	5.93261	1.57847	10.2594	11.2181	3.54585
BA_0810	1.03483	2.48071	0.846605	0.142099	0.250498	0.942608	1.36146	1.23404	1.09794
BA_0811	2.26837	5.31958	5.56735	0.70084	0.205912	1.54967	1.11914	1.1271	2.93319
BA_0812	4.85327	3.60412	6.88635	4.49842	4.84612	0.736793	6.22553	4.82295	4.58607
BA_0813	0.306447	1.72476	0.846139	1.89361	0.333813	0.279137	1.08857	0	0.731559
BA_0814	0	0	0	0	0	0	0	0	0
BA_0815	1.04671	1.40644	1.35391	0.104884	0.123262	0.0257683	0.837419	0.101206	0.405199
BA_0816	0	0	0	0	0	0	0.541898	0.545755	1.63879
BA_0817	6.95635	4.22228	4.89599	24.7795	15.6009	5.21823	28.5867	34.1579	49.8192
BA_0818	7.53646	16.8366	9.21806	10.7232	13.4484	12.3748	60.4114	45.2319	29.1766
BA_0819	3.5183	3.18451	2.10196	0	0	0	0.584692	0.294427	0.442051
BA_0820	0.886159	1.24688	0	0	0	0	0	0	0
BA_0821	0.322426	0.831736	0.667694	0.896556	1.22927	0.293693	2.76789	3.84495	2.02048
BA_0822	1.57384	2.14067	3.25916	0.0972509	0	0.573432	1.2113	3.19057	0.563565
BA_0823	57.6296	65.4927	74.1633	3.15138	4.16655	21.555	8.27309	19.5223	16.4359
BA_0824	6.66868	8.27934	12.3957	0.646389	0.783395	1.84614	2.01276	3.74232	3.51169
BA_0825	0	0	0	0	0	0	0	0	0
BA_0827	0	0	0	0.214388	0	0	0	0	0
BA_0828	0	0	0	0	0	0	0	0	0
BA_0829	0.305438	1.36094	0.0702793	3.49164	4.57482	3.75595	7.14283	1.548	2.9166
BA_0830	0.140817	1.7172	0.777625	0	0.76696	0.641338	0	0.167925	1.00849
BA_0831	2.2933	2.72487	2.95498	3.77889	0.66616	2.22819	0.362059	1.45855	0.547464
BA_0832	3.84217	1.13814	1.30282	0.499824	4.40556	3.68397	3.11277	2.65263	3.37921
BA_0833	3.54464	5.61097	4.07799	35.8664	16.41	11.906	37.7741	31.1741	22.4768
BA_0834	2.29862	2.04272	0.556735	0.448538	0.131784	0.550993	1.4325	0.721346	1.73284
BA_0835	2.43067	2.71437	1.70448	1.07283	1.00866	1.26518	20.5579	9.17886	8.49662
BA_0836	1.02905	0.579173	0.189421	0	0	0	0.731082	0.736285	0
BA_0837	2.96839	3.26873	4.98892	0.797493	0	0.117559	1.98663	3.38591	1.54048
BA_0838	4.69681	5.83471	5.95848	6.27517	7.7435	1.96568	22.0952	20.1332	14.8488
BA_0839	9.44047	13.5085	13.5486	0.741545	0.784337	1.53036	5.3523	3.91161	3.963
BA_0840	1.88309	1.87032	2.90557	0	0.180993	0.201797	0.655801	0.660468	0.132216
BA_0841	1.71339	6.10747	0.315391	0	0	0	0	0.408644	0
BA_0842	632.825	829.289	814.416	125.866	295.893	106.427	103.001	81.5051	63.6847
BA_0843	895.074	1239.55	1199.37	20.9186	32.7534	102.213	72.2022	122.155	118.42
BA_0844	1.04432	1.52385	0.640779	0.501908	0.442393	0.158543	3.98447	1.79885	1.80053
BA_0845	14.8774	16.4324	17.0109	0.125503	0	0.185005	0	0.121102	0
BA_0847	0.670492	0.943423	1.92845	0.51789	0.91296	0.229027	0.992392	1.69907	0.500193
BA_0848	1.65779	1.43546	1.17368	0.472794	0.208366	0.522711	2.71794	3.34557	1.67434
BA_0849	7.83133	10.2936	6.9853	1.2546	1.00051	1.84941	2.11788	3.68944	2.94276
BA_0851	10.0332	0	1.23124	8.26632	0	0.609271	1.58401	0	4.79031
BA_0852	20.3947	21.2815	26.0463	2.83309	3.27213	4.24828	13.8997	11.6891	7.21812
BA_0853	54.796	63.8519	62.0737	4.20831	5.6775	4.24116	29.047	21.7539	23.2257
BA_0855	34.0399	25.7903	34.0607	0.862934	0.855685	0.159007	5.16741	1.35309	2.81288
BA_0856	7.47783	7.3837	8.33133	16.7805	15.0051	7.88692	314.678	126.603	122.14
BA_0857	40.3734	32.9823	41.2583	5.622	4.95535	0.776945	22.556	14.5793	10.2942
BA_0858	1375.51	1007.09	1326.54	11.4344	5.97246	4.05781	6.4921	5.72102	3.2722
BA_0859	3.40719	0.532681	0.261324	0	0	0	0	0	0.338906
BA_0860	27.1583	28.9618	33.8102	6.88936	6.74715	1.38881	22.5103	24.2614	10.6918
BA_0861	9.91875	8.43581	10.833	0.653763	0	0.240929	2.42721	2.12907	1.26284
BA_0862	0.607541	0	0.894665	0	0	0	0.215813	0.144899	0.217551
BA_0863	41.0346	38.3089	53.9532	50.954	71.0929	10.3234	169.364	134.219	74.169
BA_0864	3.03465	1.64228	4.72664	2.74065	4.95847	2.23263	14.373	7.37685	6.82645
BA_0865	0.12422	1.16524	0	0	0	0	1.32378	0.444401	0.444814
BA_0866	5.27496	6.76502	7.43412	0.05093	0.404017	0.563071	0.390372	0.491438	0.541085
BA_0867	10.6456	5.25127	11.6562	0	0	0	0.217331	0.656634	0.657245
BA_0868	0.390806	0	0.179844	0	0	0.177989	0.694117	0.233019	0.466472
BA_0869	0	0.105759	1.14144	0	0	0	0.266997	0	0
BA_0870	88.869	91.4446	92.439	0	0	0	0	0	0
BA_0871	1.86523	2.15343	2.20091	0.0886591	0.338633	0.239603	0.226521	0.342199	0.114172
BA_0872	0	0	0.979342	0	0	0.0605776	0.866208	0.47584	0.158761
BA_0873	0	0	0	0	0	0	0	0	0.238941
BA_0875	2.94128	2.40869	3.17974	4.84662	4.72962	1.06316	11.5537	4.5653	7.30013
BA_0876	58.3869	66.218	64.1891	16.2989	12.9052	8.42956	61.7235	46.8087	28.3355
BA_0877	5.99685	10.8287	4.55347	1.8528	1.30648	1.63873	10.1186	13.4086	8.76846
BA_0878	2.96516	5.43043	4.0286	2.61748	3.4863	3.4726	12.0376	12.8529	11.5728
BA_0879	2.116	1.9849	3.65159	42.4946	22.4734	5.78229	61.3849	64.976	41.3581
BA_0880	0	0	0	0.231724	0.816988	0	2.22018	1.56519	1.34284
BA_0881	74.538	95.8433	80.0851	1.85406	3.26842	1.79808	16.829	6.77951	6.59732
BA_0882	1.73468	2.8407	2.84132	0.690374	0.896753	0.348155	5.46571	2.27898	4.21126
BA_0883	1.51026	1.67427	0.884549	0.339354	0.19941	0.083374	6.9363	2.34675	2.84057
BA_0884	3.09031	4.25952	4.12125	0.389709	0.961794	0.229789	5.37673	3.30917	1.58085
BA_0885	11.0152	10.8667	14.5391	7.35175	4.65071	0.855572	34.7808	11.744	16.6472
BA_0887	710.768	683.144	811.241	311.125	342.659	55.4559	1991.77	784.128	721.043
BA_0888	9.5869	8.60907	11.1908	2.31179	6.74976	0.798709	12.4591	5.99505	6.41928
BA_0889	1.62233	2.12131	1.80988	0.60756	0.0535517	0.716486	5.18078	0.762129	2.22983
BA_0890	0.190977	0.268717	0.0439427	0	0	0	0.847995	0.512418	0.569883
BA_0891	0.269888	1.39241	0.620994	0.333539	0	0.122918	3.67503	1.28737	0.966425
BA_0892	0	0	0	0	0	0	0	0	0
BA_0893	9.78631	10.1264	10.5392	5.67313	8.2974	1.56228	23.1755	11.971	12.1628
BA_0894	122.531	105.747	114.318	50.6218	78.6605	28.3048	90.3127	77.6912	57.9538
BA_0895	20.755	44.5007	33.3767	16.9121	12.9191	8.72556	25.9258	22.3026	16.0619
BA_0896	2.33174	0	0	0	0	0	0	0	0
BA_0897	16.247	18.2262	14.7702	31.0606	35.3234	9.12106	70.826	38.7492	34.036
BA_0898	3.50225	3.28526	3.34426	3.5167	4.2442	0.797536	37.0114	12.686	10.3986
BA_0899	2.0364	2.82714	1.72431	1.91268	1.59715	0.964561	3.37576	3.59406	2.33345
BA_0900	0	0	0	0	0	0	0	0	0
BA_0901	7.34087	5.31209	5.08335	3.88808	3.88398	1.14629	5.13251	4.58544	3.75522
BA_0902	22.0724	18.0332	31.1931	1.23191	2.01655	3.69679	14.4166	14.0098	9.43352
BA_0903	0	0	0.429694	0.288489	0	0	16.5843	9.18627	6.40851
BA_0904	0.622028	1.26422	1.24042	1.02497	0.338788	0.0944325	3.92816	4.57426	0.742462
BA_0905	0.428083	2.10819	1.67449	0.793567	1.98182	0.682384	14.4462	8.16786	7.66449
BA_0906	0.864143	1.6212	0	0	0	0	3.06963	3.60673	3.61009
BA_0907	1.35513	0.847448	0	0.279123	0	0	0.802291	0	0.539169
BA_0908	8.50903	8.76355	12.1509	3.74017	4.44334	0.838997	21.3452	13.0238	10.1565
BA_0909	2.48964	2.19801	2.22401	1.26692	2.47268	1.46738	7.45652	9.43065	8.82761
BA_0910	4.82285	5.06079	5.41688	1.11124	0.623301	1.04242	4.54914	3.41177	3.61009
BA_0911	13.4639	11.1826	15.877	0.606641	1.83328	0.894253	4.5668	5.01743	5.0221
BA_0912	17.1222	15.4565	26.3087	0.708299	0.312155	2.02296	6.10766	9.73929	8.80772
BA_0913	0	0	0	0	0	0	0	0	0
BA_0914	0	0	0	0	0	0	0	0	0
BA_0915	0.110594	0	0.610726	0	0.48188	0.201476	0.523806	0.131884	0.132006
BA_0916	0	0.342238	0.223862	0.751484	0	0	0.720005	0.580103	0
BA_0917	0	0	0	0	0	0	0	0	0
BA_0918	0.16722	0.784296	2.15467	1.03329	0	0.761589	6.73204	2.19352	1.79636
BA_0919	1.51885	1.99465	1.6775	1.31395	2.81263	0.2767	10.4309	4.89035	7.2517
BA_0920	0	0	0	0.417329	0	0	0.399847	0	0
BA_0921	2.99933	3.60325	3.05109	0.39018	0.114638	0.958611	2.74146	3.45122	3.39162
BA_0923	0.0875563	0.246394	0.201462	0	0	0	0.0518367	0	0.0522542
BA_0924	0	0	0	0	0	0.0935956	0	0	0
BA_0925	0.64081	0.467527	0.196595	0	0.387798	0.129712	0.590153	0	0.0849867
BA_0926	0.577291	0.758131	2.01903	0.142688	0.943265	0	2.25574	2.06527	0.757968
BA_0927	0.714599	0.670324	0.607107	0.0679334	0.29939	0	0.58579	0.622735	0.623314
BA_0928	2.10368	2.82667	2.17165	0.491858	0.619335	0.155368	1.27912	0.813615	0.814372
BA_0929	0	0.193058	0	0	0	0	0	0	0
BA_0930	0	0	0	0	0	0	0.984485	0.660995	0
BA_0931	3.65138	5.97205	4.65319	0.809944	0.713902	0.426408	3.32578	2.45627	1.34103
BA_0932	0	0	0.589182	0	0.464881	0	0.252664	0.254463	0
BA_0933	0.566215	0.455257	0.595577	0	0	0.294717	0.191555	0.289377	0
BA_0934	5.51748	4.92192	6.42236	0	0.0589235	0.197089	0	0.129012	0.193698
BA_0935	0	0	0	0	0	0	0	0	0
BA_0936	10.0332	12.5487	14.0054	2.68655	0.910765	1.06622	4.55403	8.57466	5.98788
BA_0937	4.65105	4.17319	8.00306	5.99789	3.74473	2.21038	14.3666	19.533	16.1719
BA_0938	2.54191	3.6561	3.97716	0	0	0.463076	1.70556	2.12187	1.11249
BA_0939	0.725565	3.82843	1.50253	0.560429	0.395179	0.165226	4.5104	1.51417	1.62383
BA_0940	0	0	0	0	0	0	0	0	0
BA_0942	12.1175	8.84079	18.5877	15.53	9.28863	0.817603	10.6282	9.63346	7.49966
BA_0943	4.59724	2.72362	4.11984	0.598051	1.31784	0.661192	2.72174	0.865615	2.31046
BA_0944	0.0952925	0.670412	0.964753	0	0	0.0434001	1.07192	0.568184	0.398099
BA_0945	0	1.32433	0	0	0.55923	0.467633	1.67169	0.153053	0.153196
BA_0946	0.288645	0.541523	0	0	0	0.394383	0	0	1.37812
BA_0947	0.815994	0	0	0	0	0	0.72465	0.243269	0
BA_0948	0	0	0	0.565591	0	0	0	0.545755	0
BA_0949	3.66124	0	1.44416	2.26236	6.55203	1.19106	40.565	21.2065	12.486
BA_0950	13.1607	15.6868	14.7994	1.2229	3.34146	0.856273	13.9429	5.78206	6.43705
BA_0951	0	0	0	0	0	0	0	0	0
BA_0952	1.5485	0.335206	2.52151	0.147208	1.03802	0.434001	2.53876	0.568184	0.284356
BA_0953	0	2.00236	0.115568	0	0	0	0.446039	0.299476	0.149877
BA_0954	3.80512	4.88621	2.6861	1.05008	2.61573	0.370157	5.51165	3.52437	2.86621
BA_0955	2.02496	1.8995	5.37192	1.32488	1.94629	1.302	67.9822	40.199	28.8621
BA_0956	4.7073	7.60473	5.53595	6.78709	9.97048	0.952845	21.9856	29.9386	15.9197
BA_0957	0	0	0	0	0	0	0	0	0
BA_0958	0.607541	0	0.139791	0.187707	0	0	0	0	0.181292
BA_0959	4.9595	5.87648	3.60363	0.967765	1.56385	0.118882	2.00899	0.933825	2.02517
BA_0960	0	1.2312	2.58859	0.463449	1.02123	1.02476	9.99079	7.37873	4.69992
BA_0961	0.426116	0.999287	0.88242	0.263307	0.464169	0	3.40574	0.762219	0.508618
BA_0962	0.336598	0.526238	0	0.277322	1.46663	0.204401	1.32852	1.60558	0.669613
BA_0963	3.69425	4.51151	2.82272	0	0.379637	0.126982	0.660269	0.914331	0.49919
BA_0964	0	0	0.226235	0	0	0	1.74633	0.87938	0
BA_0965	11.6005	12.4842	15.1377	0.638268	2.46671	2.64168	3.95143	5.4482	2.65551
BA_0966	0	0	0	0	0	0	0.248848	1.00248	0.250852
BA_0967	0.412432	0.257919	0	0.169901	0.299509	0	3.90681	2.45913	1.80504
BA_0969	0	0	0	0	0	0	0	0	0
BA_0971	5.1776	5.17014	5.07277	0.82564	0.63677	0	3.95527	1.99171	1.39549
BA_0972	0	0	0	0	0	0.653239	0	0	0.428
BA_0973	0.247557	0.464437	0	0	0	0	0	0.590426	0
BA_0975	1.53494	1.95818	2.82544	2.80749	5.01604	0.503335	32.6421	15.3756	13.0447
BA_0976	0	0	0	0	0	0	0	0	0
BA_0977	4097.07	5343.59	4098.25	1980.67	3228.96	239.927	7051.45	4916.48	2199.61
BA_0978	0	0	0	0	0	0	0.372708	1.50144	0
BA_0980	0	0	0	0	0	0	1.20246	0	1.21215
BA_0981	0.200703	0.263574	0.443332	0.0496075	0.262351	0.0365633	0.570353	0.43081	0.383298
BA_0982	0	0	0	0	0	0	0	0	0
BA_0983	0	0.429299	0.105303	0.706988	1.24631	0.104218	2.57402	1.50083	1.63879
BA_0984	1.4553	2.18422	2.14308	3.95677	5.07285	1.85586	27.9157	24.9906	27.7931
BA_0985	1.81076	14.4379	17.7769	2.23782	5.9174	3.71114	13.9365	25.1924	11.167
BA_0986	4.47066	2.85169	5.43138	1.54701	1.94796	0.81445	1.05872	0.426503	0
BA_0987	2.43472	2.61014	1.60061	0.429849	3.03103	1.58411	0.823685	0.829548	0.41516
BA_0988	16.6287	18.1982	16.8351	6.85018	7.54737	5.04894	8.5322	7.60144	1.98483
BA_0989	7.9998	12.3982	8.32318	23.6417	30.6891	5.38596	17.7092	28.2046	8.71836
BA_0990	41.9458	47.5279	42.6193	23.353	40.7153	17.0232	45.4871	63.3923	16.3585
BA_0991	837.649	756.101	863.932	138.764	215.065	90.3137	168.667	195.512	169.509
BA_0992	430.25	440.651	530.832	25.8021	40.4856	70.0859	88.0161	163.656	101.722
BA_0993	845.513	1316.19	1298.53	436.101	781.006	127.88	1823.34	2157.01	1335.87
BA_0994	27.3503	13.9421	26.1816	9.7864	14.3323	3.99494	68.5924	34.9398	28.9376
BA_0995	23.2149	23.4517	26.5212	11.9375	23.7849	13.1608	75.4484	44.0425	35.4606
BA_0996	26.1445	27.7994	35.8204	3.77116	6.70431	5.74754	29.1811	25.8733	19.5696
BA_0997	0	0	1.90407	4.15467	6.76065	0.942219	7.04266	6.47603	10.4947
BA_0998	0	0	0	0	0	0	0	0	0
BA_0999	26.3816	31.0262	26.8178	1.13545	1.42973	2.15199	1.39871	4.38252	2.50663
BA_1000	93.0814	92.6553	98.8848	15.909	31.0114	12.8532	23.4501	22.141	22.1616
BA_1001	20.5783	23.7095	29.233	16.5858	40.4462	30.5615	37.8736	46.9455	28.8343
BA_1002	3.14767	2.06685	3.47644	0	0.342876	0	1.86354	0.375361	0
BA_1003	13.9127	16.6878	18.2627	38.8978	23.6023	7.47905	32.6774	35.0858	23.9568
BA_1004	4.47444	6.03349	6.49897	0	0	0	0.579477	1.33395	1.16829
BA_1005	46.7069	39.6182	53.9635	1.84221	9.74258	4.97862	21.1805	24.2939	30.2474
BA_1006	2485.14	3730.5	3065.34	280.565	600.678	521.077	5780.53	4027.5	3449.64
BA_1007	854.315	1289.9	1149.33	205.398	414.513	293.53	3096.61	2420.49	1627.43
BA_1008	7.0068	7.09848	7.84184	0.623471	0.549541	0.561649	0.929218	0.802141	0.869795
BA_1009	1.97426	0.326812	0.96197	0	0.126504	0.95205	0.27502	0.969422	0.970324
BA_1010	22.4696	24.1958	30.0292	1.21727	2.41409	3.53269	22.0864	17.3985	24.7626
BA_1011	3.7455	5.04347	4.25347	0.485283	0.526448	0.880441	4.54225	2.80959	2.09112
BA_1012	32.35	41.5438	54.0546	6.83023	14.3685	3.4904	54.9705	30.7566	18.9988
BA_1013	0	0.79439	2.33828	2.24269	1.31784	0	12.606	4.90515	6.20935
BA_1014	1.14038	0.802297	1.20702	0.070467	0	0	4.456	1.5639	2.79042
BA_1015	37.0662	38.5714	40.8292	1.45711	2.08704	4.76574	8.37646	11.2481	14.3371
BA_1016	88.859	73.6022	102.557	19.0946	27.3785	11.7389	55.3058	43.9822	40.1137
BA_1017	0.312785	0.645493	1.26667	2.39664	2.45317	0.398875	13.9256	5.14738	6.04819
BA_1018	0	0	0.977473	0	2.8922	0	1.8863	3.79946	0
BA_1019	18.4443	20.1353	17.2683	0.88426	0.692806	0.434497	0.753084	1.04286	0.379575
BA_1020	0	1.63134	0	0	0	0	0	0	0
BA_1021	151.301	151.633	150.618	0	0.189439	0.0792053	1.54441	1.45171	0.51895
BA_1022	0	0	0	0	0	0	0	0	0
BA_1023	0	0	0	0	0	0	0	0	0
BA_1024	2.11175	1.04872	0.914636	0.307035	0.270627	0	1.91213	1.48134	1.0379
BA_1025	3.21975	7.3122	3.50926	0.837708	0.27689	0.848972	0.501636	1.31353	0.404541
BA_1026	65.3617	79.3114	96.1227	3.28878	7.27243	6.54905	11.222	10.5781	8.63755
BA_1027	272.919	352.842	462.446	17.9402	41.8523	29.5725	27.7663	29.9367	25.3243
BA_1028	1415.87	1309.84	1637.7	8881.62	7604.36	5024.7	4594.56	5200.35	4301.97
BA_1030	0.848335	0.477464	1.0931	1.88714	2.77228	0.463641	3.21438	2.02329	3.24027
BA_1031	0	0	0	0	0	0	0	0	0
BA_1032	0	0	0	0	0	0	0	0	0
BA_1033	0.341835	0.320656	0	0.211228	0	0	0.20238	0	0
BA_1034	0.708627	0.997082	1.79356	0	0.192977	0.161369	1.53829	1.33798	0.845827
BA_1035	3.01203	4.0363	3.56425	2.12709	1.56238	0.783887	8.4916	3.7629	1.712
BA_1036	0	4.11186	2.45573	0	0	0.868003	2.25667	2.27273	1.81988
BA_1037	4.00078	6.37992	4.18852	0.556239	0.653708	1.36659	0.532938	1.96802	2.98461
BA_1038	3.55504	4.91204	7.64933	0.474971	1.04662	1.44407	2.33226	4.92687	3.0965
BA_1039	6.05437	9.27225	11.1446	3.05399	5.24911	1.57566	25.8956	16.9446	10.6187
BA_1040	45.2909	60.6045	57.5671	0.811732	0.94313	3.45376	7.67123	11.1437	10.6908
BA_1041	34.1772	18.9787	31.7526	33.073	74.8098	4.77251	191.939	85.5502	60.9992
BA_1043	0	1.00907	0	3.102	5.46835	0.32662	12.7374	9.83485	12.412
BA_1044	3.32244	1.55829	0.382236	0.769878	1.80957	0.756588	9.3433	4.20965	4.70928
BA_1045	25.7273	26.7106	28.5064	20.6821	25.1679	8.75951	367.331	262.566	131.032
BA_1046	36.8956	38.0345	37.495	4.9872	8.79165	1.92543	17.9755	14.666	6.65173
BA_1047	47.4442	69.6137	61.074	1.98087	6.46014	0.730002	20.1177	18.5406	28.315
BA_1048	4.30676	4.56686	4.39468	0.462825	0.305958	0.341126	2.43891	0.669891	1.11752
BA_1049	2.92959	1.77817	2.64345	0.212972	0.375437	0.156972	3.46887	2.39754	3.08542
BA_1050	16.4316	16.6133	21.4622	2.06717	2.5723	0.806616	12.233	7.15735	5.75469
BA_1051	0	0	0	0	0	0	0	0	0
BA_1052	0	0	1.10197	0.591874	0	0.436242	0	1.42779	0.571649
BA_1053	0	0	0	0	0	0	0	0	0
BA_1054	7.01481	12.0637	13.316	0.180609	0.477577	1.33118	4.67216	2.61412	2.44212
BA_1055	10.6837	21.3916	15.5211	0.888117	0.469684	2.48744	7.9986	6.79864	8.63487
BA_1056	0	0	0.147522	0	0	0	0.189789	0.38228	0
BA_1057	0	0	0.722081	0.646389	0	0	0	0.31186	0.31215
BA_1058	0	0	0	0	0	0	0	0	0
BA_1059	0	0	0	0	0.408494	0	1.55412	0	0.671418
BA_1061	0.590952	0	0.466198	0.521661	2.29902	0.384492	1.49943	0.503367	0.403068
BA_1062	0.79178	0.848826	0.936944	9.5056	7.14632	0.412125	16.3398	7.41872	8.23569
BA_1063	0.433148	0.975145	0.239195	0	1.32112	0.473456	11.3859	6.50828	2.17145
BA_1064	0	0	0	0	0	0	0	0.280253	0
BA_1065	2.04598	1.78213	0.538021	0	0.159192	0	3.97999	0.34855	0.697748
BA_1066	1.07926	1.19647	1.53514	1.3338	1.01533	0.357485	7.02863	4.27059	3.51334
BA_1068	135.67	137.253	158.343	5.81108	9.34014	5.41682	50.1089	40.9002	39.2875
BA_1069	11.8951	13.5007	15.4844	0	0	0.119724	0.116724	0.117555	0.0784431
BA_1070	24.1411	25.2031	29.0742	0.0821891	0.507103	1.21155	3.0711	1.66544	3.17522
BA_1071	74.5483	59.6005	82.7183	1.47114	2.83652	3.99838	5.72616	7.89623	7.54836
BA_1072	591.951	728.58	631.189	27.1643	32.1553	48.3815	52.2266	42.6741	75.2605
BA_1073	13.3776	18.0026	17.0953	2.35272	3.41887	0.93734	16.8149	9.69442	8.90506
BA_1075	18.1954	16.6208	25.193	3.33863	3.3755	2.64168	27.1896	14.9233	9.76847
BA_1076	0	0	0	0	0	0	0	0.254463	0
BA_1077	0.0832099	0.468326	1.07218	0.617008	1.17833	0.0757945	4.92635	2.38148	2.38369
BA_1078	1.0487	1.31163	1.60865	2.16004	0.951955	0	6.20868	4.16858	2.7121
BA_1079	0.589209	0.138176	0.440613	0.136532	0.320913	0.0670876	0.91569	0.65872	0.439555
BA_1080	3.52682	7.87148	3.58179	3.90772	4.50415	0.221553	60.9124	33.791	28.4515
BA_1081	28.0494	24.9609	36.4171	3.69054	3.22388	0.971471	10.45	10.1746	10.5023
BA_1082	0.984389	0.307799	3.32203	0.405518	0	0	5.0509	8.60852	3.13328
BA_1083	0.434772	0.407834	0.600229	1.07462	0.236799	0.396026	10.0387	6.48084	3.63265
BA_1084	0.325063	0.304923	0.59836	0	0	0	8.85269	8.14043	5.044
BA_1085	0	0	0	0	0	0.125973	0.818773	0.32984	0
BA_1086	106.019	124.162	121.234	107.704	135.264	97.1541	187.5	194.099	157.31
BA_1087	7.34521	8.91662	6.36268	13.8833	18.8262	13.3813	8.18569	7.72871	12.8932
BA_1088	38.9518	28.4484	42.5667	2.811	4.2327	1.03593	5.3865	3.05147	3.16743
BA_1089	57.1842	61.8885	72.0518	3.04241	4.9802	3.26752	18.5725	8.80713	6.80039
BA_1090	9.91442	2.7443	7.62909	0.602592	0.354092	0.148047	0	0.581459	0
BA_1091	159.878	167.989	177.112	61.6154	74.9348	30.5654	148.5	99.4158	89.048
BA_1092	0	0	0	0	0	0	0	0	0
BA_1093	0.807313	0.820401	1.54798	0	0.293136	0	0.398301	0.401135	0.562112
BA_1094	22.1177	26.4768	29.5564	1.85491	1.10132	1.81339	4.20852	8.45209	10.6123
BA_1095	0	0	0	0	0.474587	0	8.59797	2.25138	2.42682
BA_1096	1.85228	4.24727	3.03075	2.54348	3.13864	0.187468	26.8063	18.898	14.7394
BA_1097	0	0	0	0	0	0	0	0	0
BA_1098	0	1.21741	0.358346	0	0.141373	0	1.38305	0.154766	0
BA_1099	0	0	0	0	0	0	0	0	0
BA_1100	0	0	0	0	0	0	0	0	0
BA_1102	3.09171	5.03711	3.59436	0.402198	0.531759	0.444661	6.35827	2.61963	1.84516
BA_1103	0	0	0	0	0	0	0	0	0
BA_1106	0	0	0	0	0	0	0.52132	0	0
BA_1107	0	0	0	0	0	0	0	0	0
BA_1109	1.04607	0.245314	0.481387	0	0	0	0	0.31186	0
BA_1110	23.5233	22.8918	25.3551	0.388652	1.5758	2.97915	4.69188	4.65027	4.80474
BA_1111	8.40173	12.3561	9.76422	3.07978	7.44571	1.36197	19.6437	8.66058	8.75363
BA_1112	10.4532	14.0663	16.6647	0.38448	0.135556	1.81364	4.05212	7.79092	5.94146
BA_1113	2.72517	4.0363	5.41238	0	0.312477	0.522591	4.2458	3.7629	4.7936
BA_1114	110.129	127.83	135.928	35.7413	33.6874	23.9548	67.1185	46.8115	43.8173
BA_1116	0	0.53633	1.05246	0	0.415209	0	0	1.36364	0
BA_1117	13.4021	17.0617	18.5025	174.306	149.466	85.4545	148.112	94.7511	97.8863
BA_1118	0.918462	1.2736	0.955589	0.0987024	0	0	3.35716	1.61909	1.85892
BA_1119	2.07505	3.61489	2.9102	3.0529	2.15272	0.540036	2.34002	3.41717	4.3639
BA_1120	4.23572	12.9132	7.57198	2.41601	3.28302	9.20042	22.9552	10.1994	12.6395
BA_1121	0	0.393093	0	0.51789	0	0	0.248098	2.99837	0.500193
BA_1122	0	1.52767	0.856515	1.1501	0.25343	0	2.20384	1.66464	1.3885
BA_1123	0	0	0	0	0	0.337044	2.19065	3.52999	0.883319
BA_1124	49.8685	72.3552	60.2375	3.38998	3.2868	3.39808	11.4329	10.4021	5.69699
BA_1125	0.04028	0	0.222436	0	0	0	0	0	0
BA_1126	0	0.215595	0	0.0946803	0.584173	0.139569	4.53571	1.3704	1.28023
BA_1127	42.8163	38.9965	45.7045	10.7622	15.0196	10.5764	58.1858	41.1683	35.5144
BA_1129	108.937	154.965	153.212	15.2632	22.7672	32.7878	33.6224	84.0877	39.815
BA_1130	25.238	33.2236	27.7179	12.1878	20.6766	3.67049	61.902	49.0647	24.6818
BA_1131	2.71425	0.944512	2.86075	18.1786	29.4709	18.2636	8.50122	19.6815	14.9447
BA_1132	16.2333	10.4753	18.4001	30.564	39.1636	77.4562	35.4114	72.4961	48.1156
BA_1133	0.706229	0.579663	1.54374	0.218197	0.48081	0.482469	4.59926	2.73709	1.68593
BA_1135	1.02803	0.321446	1.57696	4.65846	4.47935	2.18497	107.931	58.4361	54.4003
BA_1136	0	0	0	0	0	0.543122	1.17669	0.711041	0.237234
BA_1137	0	0	0.346078	0.929403	2.86719	0.685018	9.34994	8.07128	8.52761
BA_1138	19.7556	25.3826	19.6151	7.84234	8.08621	0.981545	44.9412	16.1341	13.4337
BA_1139	0	0.550198	1.18764	0	0	0	0.694507	0.13989	0.560081
BA_1140	3.08897	4.98383	2.2744	1.3743	1.7497	1.35057	4.53539	3.53626	0.884888
BA_1141	8.98487	9.95046	10.7649	0.513617	0.754523	0.811206	1.92154	2.76123	2.66931
BA_1142	36.2104	35.088	42.4023	0.946244	1.81048	2.05827	6.70005	7.61625	6.70943
BA_1143	16.482	18.4165	20.7466	1.49773	4.48845	0.441562	5.16597	6.93699	2.31448
BA_1144	96.0947	89.8373	127.751	10.3963	1.40978	1.47359	8.81152	12.3468	4.24815
BA_1145	47.2167	53.589	55.897	0.22272	0.78524	0.656624	4.69458	0.644726	2.5813
BA_1146	13.6258	15.4725	9.57067	0.443143	0	0	0	0	0.856
BA_1147	70.4699	95.0107	86.9648	1.40016	1.48096	1.96078	4.69527	2.16169	2.43416
BA_1148	25.6642	19.0059	21.7559	4.59062	3.31059	2.76834	10.396	5.63771	4.83681
BA_1149	0.314767	3.24791	2.89703	1.55601	0	0	0	0	0
BA_1150	111.374	150.117	144.636	723.839	698.863	43.6655	1380.63	1565.83	861.726
BA_1152	23.8327	25.6223	32.0478	2.00819	2.19151	5.07478	8.06277	6.36694	7.57355
BA_1153	1.22471	2.98695	0.450877	4.54066	5.33631	0	17.9819	13.4363	9.06335
BA_1154	260.542	321.99	328.623	93.9888	136.078	82.1072	318.192	261.83	242.607
BA_1155	15.8186	27.3528	16.8393	2.1198	2.07605	3.12481	22.7924	18.1819	7.96197
BA_1156	1.25566	2.23793	1.50238	0	0	1.02938	0.594719	0.449214	0.299754
BA_1157	5.61178	4.23953	6.13553	0.418911	0.861553	0.308759	1.24868	0.898265	0.899101
BA_1158	0.362688	0.476303	0.267047	0.448226	0.869168	0	3.09204	4.15207	2.33771
BA_1159	13.0016	13.9765	19.7401	2.63891	2.7395	4.06292	19.5527	36.4978	26.79
BA_1160	1.07281	2.17158	2.18265	0.767587	0.861087	0.822912	2.6743	1.616	3.57199
BA_1161	0	0	0	0	0	0	0	0	0.37571
BA_1162	0.534693	0.100313	0.492117	0	0.291221	0.0974085	2.7224	2.29544	0.76586
BA_1163	0	0	0	0	0	0	5.03156	0.844562	1.31499
BA_1166	37.9695	48.3753	55.5487	212.035	257.884	83.3672	394.396	297.86	147.969
BA_1167	12.0555	5.19583	11.3955	1.40934	3.8154	2.22591	24.7877	9.5194	5.63917
BA_1168	0.2586	0	0	0.958771	0	0	1.22481	2.15868	2.77802
BA_1169	0.243513	1.06598	0.597661	0.401259	0.707357	0	4.32507	2.12953	0.968868
BA_1170	14.3219	4.22228	4.14276	0	0	0	0	0	0
BA_1171	5.19494	4.03551	4.48246	0	0	0.147874	0.0961126	0.29039	0
BA_1172	29.3085	22.8553	36.7247	3.49116	5.00042	2.57317	5.01737	6.73745	6.32223
BA_1173	0	1.39829	0.914636	0	0	0	0	0	0
BA_1174	38.7801	32.9897	44.2394	1.9128	2.71631	2.89799	16.5959	14.1505	11.9057
BA_1175	0	0.364544	0.357679	0.960556	1.26998	0	11.9642	5.56122	5.10252
BA_1177	17.7387	21.0066	21.8422	3.67025	3.64306	2.94887	20.4337	16.7505	10.4429
BA_1178	21.7864	20.7951	27.7908	29.7588	33.7243	3.1334	396.003	252.055	159.677
BA_1180	1.4216	0	0.697815	0.4685	1.03237	0	0.448875	0	0.113123
BA_1181	0.987884	0.77223	2.19729	0	0	0	0	0	0
BA_1182	0	0	0.363775	0	0	0	7.02005	10.3694	2.35886
BA_1183	0	0	0	0	0	0	0	0	0
BA_1184	50.8291	35.4273	49.1862	5.81126	10.3256	9.51823	14.0521	11.4819	7.48357
BA_1185	36.1303	28.7263	39.9248	13.2635	30.298	14.4847	41.3839	34.3076	21.0598
BA_1186	0	1.24213	1.54374	0	0	0.321646	0.627172	0.315818	0.105371
BA_1187	35.3412	35.7757	44.1134	1.26765	2.03152	0.424693	6.84564	5.11518	2.89388
BA_1188	12.098	12.0082	14.6952	3.47704	5.13344	2.24241	20.2382	13.001	9.57093
BA_1189	0.366124	0.343439	2.19031	2.26236	1.59528	0.166748	12.3553	3.49283	6.77366
BA_1191	24.1404	33.3269	33.9554	8.38087	8.26981	1.67055	78.6819	28.2789	26.5234
BA_1192	36.7661	60.3366	54.8584	12.3078	12.806	7.63917	64.1038	47.5048	47.3702
BA_1193	85.1057	100.578	104.355	13.9616	16.5573	11.3507	164.332	108.347	123.24
BA_1194	464.668	479.047	573.212	9.64378	4.86766	53.4009	354.587	359.179	360.946
BA_1195	539.768	487.621	615.388	136.264	165.734	52.4534	774.264	489.744	450.504
BA_1196	1.29745	4.16611	3.62836	0.185014	0.163075	0.636369	1.71355	1.30919	1.72735
BA_1197	3.78725	2.24589	5.28863	0.699379	0.426771	0.832696	3.24732	1.765	1.35096
BA_1198	0	0	0	0.601187	0	0	1.15201	2.32041	0
BA_1200	1723.59	2139.82	1761.89	2911.65	3514.07	490.07	6452.9	6705.9	6988.98
BA_1201	12.5916	14.7159	13.3939	0	0.562134	0	0.977668	1.47694	0.246386
BA_1203	1.93515	3.91712	2.71846	8.55922	5.43632	2.69043	15.5572	16.1537	8.26673
BA_1204	1.84722	3.67685	2.69533	0.22272	0.834317	0.656624	3.62763	3.06245	2.79641
BA_1205	13.6443	23.4472	17.8074	0.967505	1.09643	1.47714	8.60764	5.06798	3.73777
BA_1206	91.0878	112.46	105.363	78.1543	94.7403	13.0129	432.232	221.788	166.564
BA_1207	0	0	0	0.496935	0	0	0	0	0
BA_1208	0.233696	1.38837	0.716959	0.0962707	0	0	1.10686	1.11473	1.02279
BA_1209	0	1.63953	0.804328	0	0	0	0	0	1.25174
BA_1210	1.80528	2.4837	1.66153	0.44621	2.0976	0.219253	3.84767	3.30097	1.58019
BA_1211	0.19377	0.545293	0	0	0.422148	0	0	0	0.462574
BA_1212	23.6603	18.7169	18.264	0.538995	2.85049	1.39044	10.0701	7.93142	9.76081
BA_1213	17.1945	21.6147	23.8586	1.51013	2.47198	1.66957	6.20089	3.2266	5.20903
BA_1214	57.5671	71.0992	74.7072	1.92542	1.44254	6.24418	9.2238	6.22393	12.0875
BA_1215	14.7696	22.9498	27.2908	0.139335	0	0.718881	0.533994	1.47894	0.269147
BA_1216	11.1455	10.0945	12.3804	0	0	0	0	0.458314	0.91748
BA_1217	2.82014	4.9381	2.76863	0	0.1024	0	0.445235	0.336303	0.897643
BA_1218	0.600203	3.20919	2.09916	0.0741758	0	0	0.49748	0.64417	0.214923
BA_1219	1.56239	4.95508	2.67054	0.367785	0.324174	0	2.11427	0.798495	0.799238
BA_1220	4.53478	4.25381	5.09191	0.448343	0	0	0.214781	0.108155	0
BA_1221	115.747	119.232	123.73	0	0	0	0.584865	0	0.0982627
BA_1222	3696.93	3228.28	3461.56	15.202	18.4159	7.34098	30.3501	23.3401	26.6165
BA_1224	199.557	200.455	227.08	0.309244	0.272574	0.0569822	1.3333	0.522197	0.746691
BA_1225	26.2504	44.3231	41.9086	0	0	0.0919655	0.717288	0.601994	0.241022
BA_1226	55.9753	73.1486	69.3443	0.626602	0.11046	0.0923677	3.36198	1.81388	1.08934
BA_1227	43.2726	58.0564	55.739	0	0.334304	0	1.09017	0.609962	0.244212
BA_1228	47.76	39.3115	51.4281	0	0	0	0	0.112557	0
BA_1229	55.6508	61.7813	76.0071	0	0	0	0.151135	0.608843	0
BA_1230	115.843	119.991	150.471	0	0	0.58913	0.170183	0.685577	0.428884
BA_1231	134.403	143.726	168.158	1.10734	1.68588	0.667773	2.31481	2.81697	1.36118
BA_1232	71.1897	63.5586	73.4203	10.3834	18.7963	13.9072	50.8118	36.1985	31.8109
BA_1233	5.45845	7.62084	13.9031	0	0.553107	0	0	0	0
BA_1234	170.263	135.209	185.084	0.187707	0.992694	0.13835	0.539532	0.90562	0.181292
BA_1235	15.9786	9.08401	19.3113	0	0	0	0	0	0
BA_1236	8.27242	11.2871	16.9578	0	0.409598	0	0	0	0.448821
BA_1237	22.9573	23.87	31.694	1.70914	2.56101	0.629863	3.93011	1.97904	4.45699
BA_1238	1545.79	1130.83	1450.09	0.731658	0.483674	0.134818	0.175252	0	0.176664
BA_1239	3.1732	4.36566	5.0298	2.61439	3.14932	1.50944	20.4982	14.2953	8.29057
BA_1240	410.128	510.585	465.164	149.734	154.963	47.4481	243.397	225.275	252.441
BA_1241	471.769	581.235	554.096	14.6049	20.1873	74.4958	112.899	131.479	144.745
BA_1242	287.77	366.169	351.916	214.042	288.486	68.6518	243.162	189.287	189.69
BA_1243	1.52719	2.50699	0.983911	0.283106	1.24768	0.347773	6.50992	4.55295	1.00258
BA_1244	16.2021	32.2137	25.6098	96.1991	113.184	11.0687	367.218	362.691	248.675
BA_1245	38.2774	60.4988	52.1204	4.7521	8.18681	8.59716	56.2921	38.1425	35.8832
BA_1246	3.43582	2.69314	2.51246	0.407164	0.461421	1.2004	23.1836	16.0522	11.3481
BA_1247	1886.36	3231.09	2877.7	3731.91	4035.05	715.207	4989.43	8357.25	4778.76
BA_1248	2.11394	1.66016	1.67414	0.121512	0.374862	0.313462	1.92096	2.63814	2.58191
BA_1249	7.58444	6.89219	8.50751	0.585825	1.2909	1.61919	9.82248	15.6865	18.813
BA_1250	7.05815	5.60225	8.37003	0.0838729	0.221782	0.432731	2.65186	6.87918	10.0448
BA_1251	7.22144	10.2039	10.9372	1.12969	1.59318	1.91508	8.22603	22.8916	16.2572
BA_1252	6.57115	7.5456	12.8257	0.700079	0.740479	1.34159	2.81717	7.02549	9.46619
BA_1253	12.7115	8.53272	10.143	0.648556	1.77847	0.7967	1.24278	4.24161	6.12474
BA_1254	15.7773	10.8476	15.8411	3.102	23.6311	2.36799	26.5363	32.4978	23.968
BA_1255	0	0	0	0	0	0	1.83551	1.84858	0.462574
BA_1256	1.06735	1.43653	0.982364	1.43379	3.13415	2.70534	20.1113	21.3613	10.6352
BA_1257	0	0.573237	0.28122	0	0	0	0.361795	0.728739	0.607848
BA_1258	0	0.548348	0.307441	0.20641	0.0909671	0.0760675	3.65863	3.98342	0.996782
BA_1259	2.03817	1.91189	1.87588	0	0.482647	0.484312	1.88871	1.79647	0.31732
BA_1260	0	0	0	0	0	0	0	0	0
BA_1261	0	0	1.14329	0	0	0	0	0	0
BA_1262	0	0	0	0	0	0	0	0	0
BA_1263	17.2605	18.5879	18.1419	7.73341	6.47558	1.56748	37.9118	24.0656	16.7433
BA_1264	0	0.265798	0.260792	0	0	0	2.34859	0.168951	0.338216
BA_1265	0.169667	1.43239	0.780786	0	1.10891	0	5.22337	1.4163	1.01259
BA_1266	55.2084	48.7813	55.2995	0.0557883	0.049173	0.0822378	1.28283	0.538318	1.34705
BA_1267	38.5472	31.6391	40.6682	0	0.0388792	0.357623	1.05655	2.08557	1.66149
BA_1268	45.4211	36.5202	45.1741	0.0447992	0.39487	0.165097	1.45937	1.21039	1.73073
BA_1269	1673.79	1167.7	1990.77	59.8914	69.1392	106.549	199.232	284.133	322.74
BA_1270	383.388	304.691	406.992	31.1254	32.3507	30.1461	70.0147	93.7184	109.618
BA_1271	22.6331	17.172	23.2816	1.64535	9.42663	1.51589	9.06448	3.57222	9.13749
BA_1272	19.7435	27.5207	26.8325	22.5756	24.3206	5.04225	24.2518	20.2436	19.6017
BA_1273	0	1.07561	0.351783	0	0	1.39262	2.26287	1.82318	2.2811
BA_1274	0	0.908822	0.178341	0.23947	0	0	3.21214	0.693216	1.8503
BA_1275	0	0	0	0	0	0	0	0	0
BA_1276	0	0	0	0	0	0	0.203882	0	0
BA_1277	0.800501	0.976174	1.5472	0.0989295	0.0871987	0.145833	1.42178	0.66822	1.14659
BA_1278	0	0.358536	0.351783	0	0.41635	0	5.88347	2.27898	0.912439
BA_1279	1.40249	2.10495	3.35612	0	1.52774	0	1.99279	3.01046	1.33923
BA_1280	65.4933	87.8145	79.69	101.975	101.572	10.1113	240.534	170.763	77.2904
BA_1281	1.24221	0.58262	2.00076	0	0.676568	0	4.04488	1.111	0.741357
BA_1282	4.14617	6.22285	7.29286	0	0.40146	0.167852	1.41827	0.988865	1.75962
BA_1283	0	0	0	0	0	0	0	0	0
BA_1284	0	0	0	0.378721	0	0	0	1.09632	0
BA_1286	0.540929	0.152224	0.697001	0.267402	0.530312	0.0492723	3.90706	1.87068	1.35589
BA_1287	188.274	211.701	224.817	66.9325	126.648	85.4136	589.898	340.567	122.286
BA_1288	33.1819	36.3507	57.9165	16.1102	19.2344	10.039	145.232	91.01	34.9385
BA_1289	12.3645	15.8343	18.4058	14.2176	8.31541	3.81948	34.3733	32.1818	20.4051
BA_1290	85.6347	58.8712	64.9962	47.6965	44.4687	6.94549	412.537	116.109	106.695
BA_1292	834.977	1311.53	1167.51	155.97	355.887	49.2397	609.221	381.387	440.095
BA_1293	23.88	56.975	56.3798	0	1.13098	0	54.0928	10.5241	9.91427
BA_1295	1767.79	1596.54	2005.04	711.673	705.377	256.138	2497.28	1991.82	1890.92
BA_1296	3.20593	3.2937	3.46585	0.817562	0.388024	0.139058	2.28969	1.57778	1.76147
BA_1297	5.38331	5.77116	9.84497	0.0864018	0.990033	0.382096	2.23513	1.83418	1.08484
BA_1298	5.90634	5.23259	6.41755	0.405518	0.536148	0.37361	9.22761	2.34778	2.93745
BA_1299	7.13026	7.25945	8.32318	1.50447	0.663037	0.633642	11.0168	4.35513	5.50087
BA_1300	23.1431	21.5204	28.7709	2.65288	3.6536	0.672137	13.1853	4.87969	7.12618
BA_1301	0.22549	0.951833	1.34898	0	0	0.102697	0.400495	0.134449	0.403721
BA_1302	4.72854	5.20956	5.90007	0.862835	1.24449	0.838304	18.4878	11.8074	12.4624
BA_1303	0	0	0	0	0	0	0.594004	0	0
BA_1304	2.33637	0.919063	1.52604	0.279425	0.164194	0.0686503	1.42784	0.449376	0.629712
BA_1305	6.55392	7.54999	3.91555	15.2046	11.5229	3.24676	83.5939	57.1771	60.3869
BA_1306	2.85993	3.62958	3.63863	1.24744	1.64929	0.229858	2.09158	1.2037	1.80723
BA_1308	15.1384	23.6347	24.0574	1.10052	1.4265	1.57456	10.7923	6.99619	5.81474
BA_1309	9.31126	15.3891	14.3284	1.76567	1.98562	1.16676	8.45853	5.34624	5.52762
BA_1310	1.49733	1.69718	2.46911	0.231309	0.407761	0	2.51169	0	0.446809
BA_1311	0.714204	2.74681	2.23494	0.353059	0	0.130111	1.69135	0.511015	1.79022
BA_1312	2.69546	2.52845	3.91208	0.128122	0	0.0944325	2.33234	0.8654	2.10364
BA_1313	1.73909	5.45333	3.61281	0.61407	0	0.271561	11.6493	7.46593	4.62607
BA_1314	16.2244	31.831	21.6668	1.44157	4.27393	1.35228	70.189	34.2694	34.3013
BA_1315	39.7644	45.2872	52.0032	2.15223	1.58085	2.8201	8.24831	10.6145	8.19926
BA_1316	185.242	154.34	209.375	2.66198	4.63933	7.44674	13.5059	14.7696	17.588
BA_1317	202.91	152.84	208.666	27.6072	29.3497	34.4487	103.947	73.4909	46.3108
BA_1318	1.05983	0.180757	0.620736	0.119072	0.104952	0.351048	1.02676	2.18302	2.18505
BA_1319	0	0	0	0	0	0	0.552809	0	0
BA_1320	0	5.0195	1.40713	0	0	0	3.16802	0.911591	1.82488
BA_1321	52.3974	89.5606	65.9806	377.418	401.584	103.944	674.048	802.936	763.582
BA_1322	15.2444	12.9028	15.8852	21.8714	34.3567	8.77842	58.0937	37.0894	17.673
BA_1323	1.89863	1.63257	1.31059	0	0	0	0.249791	0.125784	0.125901
BA_1324	51.8906	31.0395	34.2617	2.32351	2.86719	0.342509	12.4666	4.93245	3.59057
BA_1326	1681.14	1577.72	2044.3	2095.3	3119.46	1429.06	4251.74	4402.41	3683.96
BA_1327	285.688	354.411	523.681	142.736	268.396	385.506	1031.02	1467.54	665.682
BA_1328	53.7116	104.377	95.1868	12.5531	22.7997	84.1118	295.215	349.254	313.942
BA_1329	22.6587	21.7963	40.5134	14.2688	21.6951	2.76068	39.4754	22.3737	15.3316
BA_1330	131.918	95.465	126.843	43.6213	55.7864	10.3191	90.9047	40.5284	43.3599
BA_1331	129.382	131.048	149.174	83.7512	117.679	29.6673	324.084	159.411	135.224
BA_1332	1.1662	1.53151	0.322001	0	0	0	0.621389	0.139069	0.139199
BA_1333	4.641	3.57951	3.9867	0.0637285	0.33703	0.0469712	5.06789	2.58273	1.47722
BA_1334	4.48797	1.91359	6.38367	0	0	0	2.65705	0	0.486991
BA_1335	0	0	0	0	0	0	0	0	0
BA_1337	0	0.242578	0.0595023	0	0	0.235555	0.306203	0	0.154335
BA_1338	0.555952	1.36895	1.79089	0.772955	2.0439	0.822912	4.27888	3.06626	1.32718
BA_1339	2.47542	3.10918	4.32493	0	0.274218	0	0.496795	0.300198	0.500796
BA_1340	6.04519	5.75282	6.04765	0.108274	0.286306	0.159608	0.933648	0.417908	0.627446
BA_1341	1.77555	1.84399	3.50179	0	0	0.0577614	0.225256	0.151239	0.30276
BA_1342	4.28897	4.57436	6.59712	0.435658	0.127999	0.214068	1.04352	0.21019	0.771412
BA_1343	4.89257	2.50333	5.64922	0	0.1938	0	2.10661	2.43985	1.38033
BA_1344	0	0.624435	0	0	0	0	0.394108	1.98456	1.98641
BA_1345	0	0.194207	0.0952745	0	0	0.282876	0	0	0
BA_1346	0.0854589	0.160328	0.353944	0	0	0	0	0.254775	0.153007
BA_1347	0	1.10787	0.760902	5.54644	9.2629	4.73349	27.6893	27.4638	12.5464
BA_1348	0.446636	0.942666	1.33598	0	0.12163	0.406833	52.224	24.7666	17.1928
BA_1349	26.1992	27.7963	25.8592	1.00484	0.39364	0.411456	1.39064	0.754135	0.754836
BA_1350	25.7459	35.2972	27.5693	29.3705	25.0788	3.15694	48.3659	26.8644	25.4119
BA_1351	4.04547	10.6866	6.54796	3.10319	1.82348	1.86365	16.1874	10.1476	11.8221
BA_1352	1.40375	0.585233	1.29197	0	0.339801	0.994506	8.49541	6.6959	3.90958
BA_1353	88.3711	99.3825	110.21	15.7831	19.8609	6.6207	62.5787	45.297	40.7317
BA_1354	422.732	483.341	493.817	474.366	459.345	182.246	598.215	929.779	572.188
BA_1355	2.39874	7.87542	11.5906	0.741119	2.61295	1.63873	4.26044	1.43026	0
BA_1356	15.6633	15.071	15.9001	1.56567	4.0146	2.09815	19.433	14.627	13.0597
BA_1359	2.41686	4.04138	5.02911	0.129864	0.343394	0	0.870966	2.6315	0.501704
BA_1360	0.850063	1.86059	0.391188	0	0	0	0.671027	0.168951	0.169108
BA_1361	1.06871	0.729089	2.50375	0	0	0.0884975	0.11504	0.115859	0.115966
BA_1362	2.0995	3.54496	5.41052	1.38382	2.74439	0.38248	5.46914	2.67058	1.83773
BA_1363	9.77649	7.05443	8.99803	35.782	34.4062	9.24775	88.6018	147.973	93.8037
BA_1364	0	0	0	0	0	0	0	0	0
BA_1365	1.27109	0.97555	0.319059	0	0.125873	0	1.6419	0.275597	0.137927
BA_1366	30.3287	34.6588	27.9138	34.6556	47.8514	6.68723	35.199	35.4495	24.9958
BA_1367	4.3029	1.34543	2.31016	3.54515	5.07775	0.32662	2.1229	0	1.284
BA_1368	0	3.4994	0.80788	0	0	0.199887	8.05497	3.14025	4.71475
BA_1369	3.48786	8.1794	5.88526	0.47894	1.26645	0.353004	2.98271	2.77286	2.54415
BA_1370	157.775	160.175	278.729	28.3553	41.9206	29.1425	244.724	239.817	210.69
BA_1371	128.057	138.618	173.284	62.7908	49.4468	21.4396	84.23	76.6017	76.5166
BA_1372	72.2224	78.803	84.4621	65.9871	74.758	19.965	255.955	226.326	153.026
BA_1373	0	0	0	0	0	0	0.216759	0.218302	0
BA_1374	0.398645	0.0934863	0.366903	0	0.217122	0	0.590033	0	0
BA_1375	0.438057	0.0821832	0.403177	0	0	0.0798038	1.45234	0.626862	0.522871
BA_1376	3.93319	4.7023	5.03962	0.0953102	0.840085	0.421491	7.2141	4.78232	2.39338
BA_1377	6.18541	9.24985	7.50803	48.8565	48.4339	11.35	118.033	82.6341	100.366
BA_1378	0	1.03066	1.20085	0.254599	0	0	3.33377	1.6378	1.39343
BA_1379	0	0	0	0.944723	4.57985	1.04446	0	0.911591	0
BA_1380	0	0.288732	0.141647	0	0.167645	0.140186	1.09339	1.83528	1.46959
BA_1381	0	0.609845	0	0	0.531138	0	0	0	0
BA_1382	0.376698	1.53122	1.73351	0	0	0.228752	1.33812	0.74869	0.749386
BA_1383	29.3635	40.3325	39.2512	104.114	137.843	31.0453	197.436	171.537	120.793
BA_1384	39.4697	49.8622	47.6704	2.99025	3.29459	3.7192	11.7286	7.75447	10.6497
BA_1385	12.0178	15.4485	21.0684	0.864413	1.31603	2.49055	2.71048	5.00459	5.00924
BA_1386	35.877	48.2043	49.9119	5.19477	6.70695	4.7995	42.0605	23.1567	28.0542
BA_1387	10.7692	9.00989	19.0198	5.03589	12.3651	1.85586	45.1476	21.5197	17.7181
BA_1388	30.1879	37.2717	33.6046	8.55274	8.51339	5.70604	89.0795	40.9083	38.7388
BA_1389	34.4365	57.3505	47.6688	9.21714	9.42807	3.5645	41.3751	27.3954	28.41
BA_1390	0	0	1.34083	0	0	0	0.431249	1.30296	0
BA_1392	0.357041	0.558199	0.711992	0.367706	0	0.0542038	0.352303	0.425773	0
BA_1393	0	0	0	0	0	0	0	0	0
BA_1394	0	0.585233	0.861316	0	0	0	0	0.185997	0
BA_1395	0.186497	0.174942	0.772413	0	0.101576	0.169877	1.10414	0.333598	0.222606
BA_1396	0	0	0	1.60192	0	0.787133	0	0	0
BA_1397	2.62213	1.66389	1.06471	0.28593	0.336034	0.140497	5.20511	4.50641	3.03776
BA_1398	0	0.393884	0	0.345955	0.152466	0.509973	6.2978	2.00293	2.17186
BA_1399	10.738	15.7659	9.88297	12.1165	11.1883	6.80421	19.3483	11.6916	13.9315
BA_1400	1.2063	1.50875	1.11025	0.496935	0.876019	0.366267	11.4268	8.15163	2.39977
BA_1401	0	0	0	0	0	0	0	0	0
BA_1402	1.38003	3.11644	3.0107	0	0.278382	0.232786	2.84447	2.07235	2.2573
BA_1403	3.34186	3.79476	2.752	3.36923	5.17305	0.961278	11.1421	7.02651	8.2927
BA_1404	11.5521	15.0766	13.2903	15.3628	21.7479	1.02938	108.239	76.0669	72.0909
BA_1405	0.484201	0	0	0	0	0	1.14666	0.384941	0.385299
BA_1406	62.1669	55.0111	51.7058	5.87641	30.5021	6.57705	86.9562	44.3126	36.5761
BA_1407	2.69278	0.42099	2.89143	0	0	0	0	0	0
BA_1408	2.02776	2.85319	3.47339	5.012	2.2702	2.61666	63.9607	40.2348	35.4315
BA_1409	7.87316	8.35711	9.82058	8.06567	10.7203	4.57657	66.4223	36.7521	22.1954
BA_1410	361.318	257.672	322.711	0	0.204247	0	0.444035	0.894391	1.11903
BA_1411	16.4081	13.9485	14.0004	0	0	0	0	0	0
BA_1412	0	0	0	0	0	0	0	0	0
BA_1413	250.485	187.604	240.092	19.7592	31.7769	1.78851	87.0184	114.732	44.864
BA_1414	1.74636	3.54935	4.55404	2.15824	3.48758	0.530245	68.9276	105.169	38.2156
BA_1415	0	0	0	0	0	0	0	0	0
BA_1416	7.91906	6.11751	6.0023	3.26225	5.91997	2.6166	14.1571	18.6093	10.1937
BA_1417	55.4462	35.2752	57.4714	15.9297	23.9362	10.2874	75.0038	100.766	74.3869
BA_1418	24.7367	21.6657	26.0375	1.52009	2.53082	6.47336	26.3773	64.7015	38.8244
BA_1419	176.939	79.0148	173.373	11.1505	21.3822	25.5339	73.8055	160.325	106.955
BA_1420	276.652	128.704	259.215	20.8703	37.3893	44.8969	132.657	328.163	180.103
BA_1421	550.689	244.271	465.682	51.1455	78.4819	69.5577	139.5	324.958	234.347
BA_1422	123.458	64.13	118.174	9.68239	26.6356	13.591	57.6107	105.151	65.4607
BA_1423	25.6224	16.8468	24.5739	7.39843	32.4753	7.08894	175.086	177.76	56.1645
BA_1424	2.75608	2.63703	2.53663	1.36244	1.68123	0.301256	5.67834	5.65302	3.2239
BA_1425	9.31165	11.201	9.88094	4.33233	6.68258	1.79615	7.78285	9.92845	9.02237
BA_1426	28.5486	20.5531	31.3914	1.60068	0.999368	1.67136	5.8789	6.88609	5.86184
BA_1427	45.0257	20.0006	40.1249	1.17767	0.648764	4.23151	6.91106	11.7898	4.97623
BA_1428	32.1828	20.1259	33.7935	3.14357	3.6141	2.71993	3.14284	7.51737	6.99634
BA_1429	10.5458	10.3462	8.72656	2.2718	2.2132	1.14567	3.4368	5.42264	3.11803
BA_1430	22.9431	13.8599	25.0016	4.42325	6.69785	3.17657	7.06327	11.3817	6.24383
BA_1431	0.215367	0	1.38753	0.26616	0	0	0	1.54096	0.257065
BA_1432	16.8431	13.1021	24.2613	8.03851	17.8252	4.30328	38.9953	31.4346	20.4311
BA_1433	7.49786	14.4573	38.7214	4.11831	6.80619	0	23.6748	19.3727	12.4299
BA_1434	21.349	17.4054	25.1219	1.23952	1.87293	0.97885	3.98694	4.01532	2.99291
BA_1435	14.8852	15.1731	13.6086	16.3109	20.4302	37.6027	484.811	318.92	216.167
BA_1436	20.692	28.3711	22.3373	7.20213	12.3346	5.64432	23.016	16.89	11.7108
BA_1437	1.41325	0	0.144525	0	0	0	0	0	0
BA_1438	13.0564	20.5776	15.1791	1.50251	2.36079	1.92596	2.87914	4.91677	1.64045
BA_1439	0	0	0	0	0	0	0	0	0
BA_1440	0	0	0	0	0	0	0	0	0
BA_1441	0.122471	0.114883	0	0	0	0	0	0	0
BA_1442	0	1.32048	0.107967	0	0	0	0	0	0
BA_1443	2.61614	0.603454	1.53943	0.212009	0.233587	0	0.304692	0.255718	0
BA_1444	2.05606	0	0	0	1.49312	0	0.405756	0	0
BA_1445	0.627506	0.0840895	1.07258	0.664715	0	0	0	0	0
BA_1446	0	0	0.424003	0	0	0	0	0	0.109976
BA_1447	0.112745	0	0.103767	0	0	0	0	0	0
BA_1448	0.102677	1.44473	1.18126	4.3778	4.97715	0.935265	59.7552	36.1818	28.188
BA_1449	0.777246	1.82272	1.12413	0.823334	1.81426	0.70798	6.63944	1.3241	2.91573
BA_1450	5.63733	9.08723	7.30413	3.31433	3.81561	1.64518	41.0871	11.4218	13.7842
BA_1451	0	0	0	0	0	0	0	0	0
BA_1452	0.317159	0.396678	0.973016	0.653266	2.07289	0.818535	9.07556	7.87945	4.29041
BA_1453	3.90806	2.01626	8.09298	0.241488	0.212853	0	0	0	0
BA_1454	11.0335	8.77275	16.6348	5.06468	4.12073	0	13.6866	7.76918	7.90183
BA_1455	0.658033	0	0	0	0	0	0.779162	0.784708	1.00985
BA_1456	1.7803	2.72147	4.36944	0	0	0.0600609	1.95186	3.3811	1.33796
BA_1457	2.64165	7.95018	6.17958	3.4007	4.19644	2.30598	10.8174	5.90659	3.81001
BA_1458	3.80591	1.38837	2.72445	1.82914	0.690963	0	6.50937	8.3207	5.29991
BA_1459	34.3454	55.4775	56.8897	7.16943	7.82922	4.25546	79.4507	53.0788	54.5376
BA_1461	12.9808	25.914	15.9295	75.275	102.605	70.3373	2766.64	2069.5	1152.12
BA_1462	144.954	176.84	156.596	7.42265	13.3779	25.4763	65.3853	84.4514	62.167
BA_1463	2.21129	2.85214	2.20482	4.66856	2.50913	0.167852	7.74592	9.88865	6.26864
BA_1464	1.05934	0	0	0	0	0	0	0.42109	0.842964
BA_1465	2.09261	1.60606	1.22563	1.64573	1.51966	0.346568	6.15699	4.00784	4.31433
BA_1466	0	1.51166	0	0.663859	0	0	3.02124	1.92173	0
BA_1467	138.666	161.567	154.496	273.637	442.924	49.4639	268.243	359.562	283.807
BA_1468	4.89118	3.31365	4.50172	8.7313	12.2839	2.59892	19.9486	14.9059	12.1629
BA_1469	0	0	0	0	0	0.279137	0	0	0.36578
BA_1470	1.47822	1.38664	1.12043	0	0.189439	0.237616	10.399	5.91053	3.42507
BA_1471	5.43683	7.58457	8.53232	0.258426	1.29077	0.444438	29.8772	6.06784	8.15344
BA_1472	9.20034	4.84139	13.7343	0.554644	0.855531	0.1022	4.11843	3.61255	3.61591
BA_1474	9.74095	9.26657	12.1966	0.170153	0.337447	0.156765	1.91555	2.46278	1.93098
BA_1475	0	0.28746	0	0.757443	0.333813	0.279137	0.725714	0.730879	0.731559
BA_1476	0.71715	0	0	0	0.390596	0	0.84916	1.71041	1.284
BA_1477	9.45449	12.1854	17.8278	0	0.08373	0.0700157	1.09218	0.274988	0.183496
BA_1478	0.330992	0.517474	0.101546	0.477231	0.600917	0	3.33132	1.18413	2.17292
BA_1479	0.411618	0.154446	0.227306	0	0	0.82486	0.38991	0	0.0982627
BA_1480	179.646	149.007	174.582	663.828	710.494	392.923	704.803	680.742	491.344
BA_1481	9.58139	27.4557	28.2674	29.1973	80.4937	3.22799	201.104	109.876	107.002
BA_1482	1.49805	2.81047	3.11107	0.996888	1.63183	0.629793	14.4179	6.22963	5.2726
BA_1483	91.3083	86.0201	84.7623	16.1725	16.6128	2.68872	95.184	45.1734	39.4607
BA_1484	651.587	819.786	913.589	18.907	25.7805	35.9142	48.1446	85.0975	80.826
BA_1485	0.53995	1.43507	0.248478	0.77851	1.56845	0.409859	3.09015	3.32678	0.859322
BA_1486	10.9256	17.5187	13.7461	3.19269	5.89203	0.931466	27.8492	13.8311	12.7198
BA_1487	1.25178	0.50324	3.29175	0.442004	0.194796	0	4.44663	2.55902	1.49415
BA_1488	23.0934	27.643	29.7303	8.05419	10.9574	3.87154	41.4359	27.37	16.4035
BA_1489	158.687	132.506	150.675	1.599	1.65811	0.415958	0.901188	0.816842	0.545068
BA_1490	2.97068	3.83161	2.96199	0	0	0.0563739	0	0	0
BA_1491	5.01884	8.86834	4.61922	0	0	0	0	0	0.278631
BA_1492	10.5001	15.2668	12.4425	0.648828	0	0.358665	0	0	1.40998
BA_1493	56.6637	60.5029	63.233	0.826632	2.28992	5.65752	5.43089	2.39293	2.16704
BA_1494	0.133519	1.50296	1.72043	0	0	0.243241	0.948582	0.318445	0.318741
BA_1495	5.43666	5.7423	8.43153	2.48651	1.67872	0.506914	6.79224	6.27904	5.67172
BA_1496	39.5015	51.0973	45.8187	10.6998	9.03806	11.227	46.4168	45.1699	39.8295
BA_1497	26.5235	26.794	34.6054	3.36195	2.85746	0.442487	13.5747	6.02465	4.05882
BA_1498	23.8671	24.2265	28.5315	0.968673	1.45148	1.46362	14.7567	10.6556	9.30894
BA_1499	2.03542	3.03243	2.42434	1.92359	4.04311	1.19967	6.94674	5.85395	2.85824
BA_1500	0	1.59414	1.66839	0	0	0	2.14641	0.405317	0.676156
BA_1501	0.507023	0.951217	1.02663	0.12532	0.662761	0.184735	8.16481	5.56257	9.92511
BA_1502	786.14	1172.53	968.121	897.179	1277.04	274.724	1667.89	1468.5	1161.3
BA_1503	7.29295	16.0502	12.65	46.4514	40.3322	15.841	175.033	145.84	71.9834
BA_1504	0.852333	0.67652	0.120687	0.0810271	0.499933	0	1.24213	0.547298	0.782582
BA_1505	1.41038	1.19496	2.76365	0.0562261	0.49559	0.331533	1.07742	1.62763	1.24901
BA_1506	0	0.927225	1.7058	0.763497	0.672963	0	2.04824	1.17875	0.589925
BA_1507	0.726133	0.9536	1.20297	0	0.158195	0	0.343919	1.73183	0.346689
BA_1508	9.51449	6.82004	11.8135	0.88743	1.27107	0.245281	4.57013	2.67596	1.17852
BA_1509	18.0468	20.0608	23.4147	1.37552	3.20423	2.31732	10.449	5.87794	10.9128
BA_1510	5.8351	5.68821	8.52958	2.68655	3.11577	0.625305	12.1927	8.04989	5.32606
BA_1511	274.413	253.149	279.696	50.9401	76.9541	40.6004	328.257	219.256	190.987
BA_1512	0	0	0	0	0	0	0	0	0
BA_1513	0.597112	0	0	0	0	0	0.353513	0.356029	1.42544
BA_1514	29.5345	24.3294	33.3921	1.48224	2.12302	0.546243	7.63329	4.46955	1.43159
BA_1515	3.47817	3.72877	2.61324	0.175449	0.309288	0.646574	1.84909	0.253943	0.25418
BA_1516	19.0693	21.5725	25.0445	1.5005	1.71157	1.62639	6.59625	4.59914	3.83618
BA_1517	0	0	0	0	0	0	0	0	0
BA_1518	5.75415	7.90367	5.57968	2.53973	1.23121	0.187191	6.69168	4.41119	3.18882
BA_1519	131.128	103.678	134.518	17.2988	34.7195	27.2113	68.0904	82.738	57.5004
BA_1520	20.0932	19.2215	20.3243	40.3214	44.7864	13.893	38.3183	34.7161	23.5086
BA_1521	32.4848	17.8524	31.1062	0	0	0	0	0	0
BA_1522	0	1.38837	0.523932	0	0	0	0	0	0
BA_1523	1.55797	5.11505	4.08667	0	0.16971	0	0.092238	0.371578	0.0929809
BA_1524	1.8801	0.705443	1.73039	0	0	0	0	0	0
BA_1525	64.625	103.26	81.8634	4.52818	3.52848	2.99892	7.98535	8.67543	10.5216
BA_1526	365.855	466.415	455.877	8.24367	7.19201	27.7141	16.6027	28.4903	24.8608
BA_1527	2.49431	3.11969	5.10155	0	0	0	0	0.330497	0.330805
BA_1528	1.71339	3.85735	2.52313	1.27049	1.49312	0	0.811513	0	2.04512
BA_1529	27.9487	45.1087	34.1401	9.14302	8.6185	5.42854	36.9868	32.5938	26.4917
BA_1530	936.66	804.984	932.73	0.232665	0.615228	1.15753	2.28492	1.68379	2.30332
BA_1531	3016.04	2940.48	2810.96	5094.02	5997.98	241.576	15343.3	7705.04	11624.2
BA_1532	23.8399	37.9594	40.6201	1.05762	1.86443	1.11361	8.68561	4.22792	7.29631
BA_1533	2.37148	1.29765	2.18265	0.610581	0.861087	0.090006	0.585004	1.53184	0.117943
BA_1534	8.97594	5.49118	9.06939	0.723448	0.318832	0.977568	1.73286	2.79231	2.09618
BA_1535	4.77255	5.42648	6.32258	1.07239	0.551382	0.592804	2.82553	2.93187	1.81255
BA_1536	55.9939	63.7904	67.0391	14.264	15.1212	3.40973	291.43	137.266	157.873
BA_1537	2.6116	3.00656	5.02581	0.220059	0.38793	0.486585	3.65458	2.33576	1.9837
BA_1538	3.63439	4.72504	5.98579	0.551593	0.208366	0.58079	4.00141	3.04142	2.20708
BA_1539	141.316	168.18	189.137	77.7748	89.8814	11.3395	321.919	199.032	154.789
BA_1541	2.31511	4.34334	3.44981	1.49868	1.08079	0.702931	3.52449	3.94397	1.44747
BA_1542	16.2228	21.183	14.6922	36.5692	49.1976	10.0484	574.582	731.581	491.066
BA_1543	1.83464	5.73657	7.87994	3.58995	3.3308	2.64598	15.0255	11.8507	8.57693
BA_1544	1678.22	2175.92	2006.39	343.375	269.507	717.798	875.327	1092.35	955.841
BA_1545	1249.67	2047.84	1727.43	156.633	124.119	366.272	844.461	1036.57	1132.14
BA_1546	1287.42	1829.14	1564.38	1666.15	1685.54	737.652	3218.6	3122.22	2149.2
BA_1547	0	0	0	0	0	0	0	0	0
BA_1548	0.238231	2.34644	1.97336	0.294417	0.90827	0.1085	19.6048	7.67048	8.3885
BA_1549	2.94073	1.52195	1.67994	7.01794	7.40083	3.1405	55.3526	26.9664	17.7926
BA_1550	9.35753	18.3008	14.7061	0	0	0	0	0.210545	0.105371
BA_1551	68.8474	101.911	87.9395	71.5572	76.1099	50.0391	233.781	214.097	174.611
BA_1552	6.5114	4.88637	3.39599	1.4753	1.77322	0.0988521	0.771	1.29415	2.2021
BA_1553	2.68463	1.40728	2.9069	0	0.0860109	0.287692	0.373978	1.4124	1.13097
BA_1554	0.375005	0.175885	0	0	0	0	0	0	0
BA_1555	15.9126	15.253	19.4474	0	0.0947195	0.950463	2.05921	2.07387	2.17959
BA_1556	19.7243	19.989	30.6345	3.26467	3.6449	1.76457	12.7202	6.72039	5.4654
BA_1557	1.48218	3.5222	4.45625	0	0	0.540036	0.585004	1.17833	0.471773
BA_1558	10.0852	12.6518	9.17032	0.225248	0.330898	0.16602	2.01425	0.724496	1.01524
BA_1559	18.7757	17.0108	19.7494	1.22505	0.254068	0.531133	3.38312	1.94697	2.22718
BA_1560	30.9487	23.7043	28.223	0.526346	1.23715	0.452601	6.47181	2.79338	4.4905
BA_1561	3.04005	1.50972	1.64587	0	0	0	0	0	0
BA_1562	19.8161	17.5772	23.5036	4.30361	1.80633	2.5678	8.73755	12.6558	8.80792
BA_1563	9.3517	6.54074	11.8536	2.53449	2.41267	1.41972	13.0158	6.94551	4.79784
BA_1564	0.90814	0.511124	1.83882	2.02018	1.18709	0.827209	7.74221	12.3458	4.76946
BA_1565	2.30721	2.60642	3.51632	1.31837	0.945844	0.474554	5.40507	4.31933	3.2277
BA_1566	6.95635	7.67688	6.40245	0	1.33722	0	0	0.975939	2.44212
BA_1567	7.32975	9.081	7.00069	0	0	0.251945	4.42137	2.14396	5.6125
BA_1568	59.2491	73.9393	77.4551	12.3849	13.3421	6.61935	76.609	35.2925	42.88
BA_1569	2.75499	2.76889	7.51631	0.121598	0.750254	0.268872	0.81553	1.056	1.17443
BA_1570	3.01048	2.21882	4.55197	0.531498	0.351355	0.0979354	1.78232	1.53857	1.54001
BA_1571	0.134293	0	0.247199	0	0	0.489299	7.95063	3.04274	2.4044
BA_1572	14.388	14.8292	16.0715	2.01118	2.19476	1.41175	8.4112	6.65364	6.01234
BA_1573	2.7733	2.16789	3.50965	0	0.251746	0	0.957774	0.275597	0.551708
BA_1574	0	0.254648	0.499703	0	0	0	0	0	0
BA_1575	5.53346	9.26896	6.54796	0.488465	1.29163	0	7.48805	0.471334	0.471773
BA_1577	1.61776	1.82103	6.55134	0	1.05733	0.589435	2.68177	3.08669	0.77239
BA_1578	17.5931	18.5896	14.5172	21.2425	19.3845	6.44694	31.6065	62.2161	32.8266
BA_1579	227.629	308.502	292.635	126.479	170.594	14.597	146.625	196.746	96.5084
BA_1580	12.4895	10.2171	16.1732	0	0	0	0.515878	0.346367	0.173344
BA_1581	40.2216	48.5535	71.3069	0.20372	0.179563	0.600609	0.975931	1.37603	0.983791
BA_1582	0	0	0	0	0.273558	0	0.297359	0	1.19902
BA_1583	184.405	187.266	222.191	33.8283	79.5868	14.435	257.828	222.358	176.381
BA_1584	10.2605	9.68203	9.1062	0.301913	0	1.83584	4.55594	2.84042	2.98886
BA_1585	1.52887	1.07561	2.81426	2.83417	0.41635	0	0	0	0
BA_1586	23.0202	24.0195	25.5833	1.19834	1.60392	0.686964	4.84771	1.6274	2.70058
BA_1587	21.0938	24.3034	25.0274	6.91385	13.9863	3.25801	25.6825	12.3038	6.40392
BA_1588	0	0	0	0	0.480607	0.133962	2.78625	2.80608	1.40435
BA_1589	13.8972	13.4731	16.149	0.767587	0.761139	0.424314	1.74665	0.0925835	0.648687
BA_1590	0.186497	0.262413	0.68659	1.84386	0.609456	0.169877	1.21455	2.22399	0.667817
BA_1591	1.17308	1.43051	2.05138	0.434923	0.638918	0.213707	0.694507	0.55956	0.840121
BA_1592	2.84147	4.98532	2.66365	0.19509	0.401233	0.575167	1.99379	1.19224	1.38177
BA_1593	1.67479	2.80539	1.65153	0.221762	0.521243	0.217934	6.58665	4.2797	2.57021
BA_1594	1.29421	0	0	1.9993	5.28667	1.17887	3.44799	3.47253	0.386195
BA_1595	10.9127	14.4988	14.2607	1.33924	0.952632	0.761964	11.7734	6.52937	6.92122
BA_1596	56.1438	52.9221	46.8841	1.01539	1.78998	0.249465	14.9171	5.87869	6.53795
BA_1597	0	2.09594	1.91936	0.184089	0	0.135684	2.46929	3.37504	3.55597
BA_1598	0	2.63893	5.8846	0	0.557174	0	0	2.43985	0.305265
BA_1599	123.678	116.25	125.051	3.71538	7.00447	5.55293	37.674	37.245	23.8231
BA_1600	0	0.871984	0.855561	1.14882	0.337531	0	8.98899	9.97675	1.47941
BA_1601	0.894707	0	4.3232	0.82929	0	0	1.0594	0	0
BA_1602	1.51094	1.5874	2.33625	0.373457	0	0	0.787188	0.288288	0.432834
BA_1603	0.180216	2.19766	0.995199	0.22272	0	0	2.34729	0.859635	0.215109
BA_1605	2.49469	4.95026	3.26746	1.66011	1.77681	0.0873989	11.3612	4.92008	5.49729
BA_1606	1.60655	1.13026	1.25683	1.092	2.97503	0.365844	5.04103	2.01161	3.3558
BA_1607	0	0	0	0	0	0	0	0	0
BA_1608	0.991265	0.492273	0.536668	0	0	0.0531133	2.69268	1.18209	1.73998
BA_1609	2.71513	1.40519	4.22234	0.115706	0.101986	0.255845	0.997735	0.558242	0.782266
BA_1610	0	1.56109	1.22535	0	0	0	0.394108	0	0
BA_1611	0	0.618516	1.06202	0	0.179563	0.150152	0.975931	0.196575	0.196758
BA_1612	0.87227	1.02278	0.802815	0	0	0	0.129104	0.910162	0.130144
BA_1613	1.9377	3.45353	2.27385	0.179603	0.474917	0.573631	2.63855	1.90634	1.61901
BA_1614	0	0.161252	0.0527384	0	0	0.0521946	0.339244	0.273327	0.136791
BA_1615	0.695635	0.570968	0	0	0.0947195	0	0.617764	0	0.51895
BA_1616	0	0.558783	0.182753	0	0	0	0.783716	0.868223	0.0790028
BA_1617	0.844541	0.291868	0.327282	0	0	0	0.473685	1.11313	0.159167
BA_1618	32.9541	41.2554	39.8319	0.719603	0.478223	1.32596	5.63606	7.27432	6.87842
BA_1619	0.161776	0.379381	0	0	0.264334	0	1.62821	0.578754	0.579293
BA_1620	3.22973	2.79658	2.74391	5.37311	8.25413	3.05506	13.6791	9.62868	9.48937
BA_1621	0.267552	0.250975	0	2.31457	0.582889	0	4.43523	1.27623	1.27741
BA_1622	1.67991	3.00839	3.02201	10.1918	6.65428	1.66931	63.9238	27.8641	23.424
BA_1623	1.44173	1.18335	0	0	0.98155	0.492468	2.1339	1.28945	0
BA_1624	5.3449	5.1634	6.24092	0.591535	0.868987	0.217996	7.36783	4.75658	5.04667
BA_1625	0	0.941802	0.792056	0	0	0	0.84916	0.855204	0.5136
BA_1626	1.91666	1.69215	1.97158	0.139335	0	0	0.800991	0	0
BA_1627	0.790494	3.33683	1.4551	0.976929	0	1.4401	0.468003	0	0.471773
BA_1628	10.9394	9.99851	10.8429	1.73326	2.13883	0.255501	1.66066	3.01046	1.67403
BA_1629	0.706229	1.65618	1.62499	0	0	0	1.67246	0	0.421482
BA_1630	0.764434	1.70304	0.879457	0	0	0	0.226287	0	0
BA_1631	1.54096	1.44549	1.92479	0	0.599491	1.80468	4.04023	2.10012	2.10208
BA_1632	23.9792	34.7424	25.7846	70.1255	74.7412	4.75772	248.23	185.162	120.722
BA_1633	6.63563	7.36565	5.90369	21.3216	25.1782	4.53321	19.6427	24.5304	34.4537
BA_1634	77.5195	69.6547	80.3592	97.5669	108.219	36.6063	74.8805	88.55	48.2121
BA_1635	207.703	283.916	256.098	3490.93	2767.57	1540.57	3221.83	3629.94	2469.59
BA_1636	137.738	125.922	161.245	22.8278	26.3982	29.7137	59.5832	109.216	54.8429
BA_1637	0	0	0	0	0	0	0	0	0
BA_1638	0	0	0	0	0	0	1.77774	0.298399	0.896029
BA_1639	5.50287	4.2642	5.83542	10.1271	25.0848	12.5312	95.6835	114.482	15.7068
BA_1640	4.80912	6.88545	7.49347	0.312807	0	0.0768517	1.54847	1.00612	1.20847
BA_1641	0.754303	1.10066	1.6199	0.310734	0.182592	0.152685	1.19087	2.59858	0.800308
BA_1642	2.51558	2.21525	1.84277	0.190339	0.838845	1.4029	7.65936	4.10182	4.53459
BA_1643	0.104607	0	0	0.517111	0	0	0	0	0.12486
BA_1644	0	0	0	0	0	0	0	0	0
BA_1645	0	0	0.664614	0.594946	0	0.219253	0.997543	0.14352	0.287308
BA_1646	12.7277	4.52863	8.88668	11.9327	16.0157	0	13.7714	8.37399	2.61931
BA_1647	4.26479	3.46715	5.93142	2.57675	1.75502	0	3.70322	3.05147	2.94119
BA_1648	0.119116	0	0.109631	0	0	0	0	0.852275	0
BA_1649	2.87849	2.52013	1.8545	5.92895	5.53946	2.62197	33.8563	12.1286	12.827
BA_1650	0.513173	1.49762	1.99421	0.563736	1.24222	0.98682	14.4482	8.09149	5.92113
BA_1651	4.95775	3.63327	1.56853	1.53175	0.675061	0.423369	3.30208	4.43411	4.43823
BA_1652	0	0	0.158215	0	0.187254	0	2.57826	0.614986	0.683954
BA_1653	0	0	0	0	0	0.135684	0.705512	0.5329	0.533396
BA_1654	0	0	0	0	0	0	0	0	0
BA_1655	0	0	0	0	0	0	1.13351	0	0
BA_1656	0	0	0	0	0	0	0	0	0
BA_1657	0.346662	0	0.319059	0	0	0	0.547299	0.413396	0.413781
BA_1658	0	0.170821	0.167603	0	0	0	0	0	0.217361
BA_1659	0	0.0963862	0	0	0	0	0.365001	0.367599	0.122647
BA_1660	0	0	0	0	0	0	0	0.676262	0
BA_1661	1.00766	0.94523	0.895447	0.0429419	0	0	0.617147	0.0828719	0.165898
BA_1662	0.12725	0.59683	0.546551	0	0.0924093	0.193184	0.652921	0.708151	0.759439
BA_1663	0.0514523	0.0965288	0.0947108	0	0	0	0.0609235	0.245428	0
BA_1664	0	0	0	0.120069	0	0	0.11504	0.811011	0.695799
BA_1665	1.69016	2.33644	3.43865	1.42917	4.84499	1.05337	4.95054	3.60673	2.5483
BA_1666	18.9847	20.4665	21.7762	1.926	1.0803	0.516205	6.87803	0.506852	4.3968
BA_1667	0	0	0.413951	0	0.16331	0	0.355037	0	0.178948
BA_1668	0	0	0	0	0	0	0.182231	0	0
BA_1669	1.07186	2.11144	1.28246	0.0662325	0	0.0976336	0.190374	0.383458	0.0639692
BA_1670	3.54259	4.00282	2.88999	0	0	0.146676	0.095334	0.480063	0.384407
BA_1671	1.95519	1.3514	2.13099	0	0.336282	0.093734	0.304617	0.797642	0.429899
BA_1672	5.29288	5.67421	16.0061	0	2.05912	0.860927	11.639	7.88972	4.28698
BA_1673	0.255748	2.63893	4.94307	0.316065	1.11435	0	3.33108	1.82988	1.22106
BA_1674	0	0	0.157308	0.211228	0	0.155686	0	2.0382	0
BA_1675	0.842173	2.05398	2.94544	1.24896	0	0.153424	0.398879	0	0
BA_1676	4.65308	0	2.35542	0	0	0	0	0	0
BA_1677	0.044308	0.207814	0.16312	0	0.0482647	0.0403594	0.157392	0.21135	0
BA_1679	0.623577	1.16988	0.0637694	0	0	0	0.738363	0.660995	0.248104
BA_1680	1.62247	2.09268	1.77327	0.375961	0.11046	0.184735	0.360212	0.967403	0.847265
BA_1681	2.93404	1.90156	2.99501	0.725205	0	0.0485922	0.947491	0.508925	0.0636748
BA_1682	0	0	0.939234	0	0	0	0	0	0
BA_1683	0	0	0	0	0.342876	0.573432	0	0	0.37571
BA_1684	0	0	0	0	0	0	0	0.0992282	0.198641
BA_1685	0.608073	0	0	0	0	0	0	0.290052	0
BA_1686	0.105961	0.844866	0.682668	0	0.115424	0	0	0.252718	0
BA_1687	0	1.54446	0	0	0	0	0	0	0
BA_1688	0	0	0	0	0	0	0	0	0
BA_1689	0	0	0	0	0.23904	0	0	0	0.261931
BA_1690	0.460178	1.43889	1.55296	0	0	0	0.6357	0.274382	0.366183
BA_1692	2.42407	5.51244	5.94948	10.3491	14.1629	2.67642	65.0598	46.3391	30.2492
BA_1693	0	0	0	0	0	0	0.546694	0	0
BA_1694	0	0	0	0	0	0	0	0	0
BA_1695	0	0	0	0	0	0	0	0	0
BA_1696	0	0	0	0	0	0	0.299522	0	0
BA_1697	0	0	0	0	0	0	0	0	0
BA_1698	2.32831	2.83544	3.30837	1.46396	3.38165	0.483696	8.07724	5.06594	4.92439
BA_1700	0.103517	0.0485517	0	0	0	0	0	0.246889	0
BA_1701	0	0.192772	0.378283	0	0	0	0	0	0
BA_1702	0.109722	0.0686156	0.100985	0	0	0	0.303144	0.0436145	0.261931
BA_1705	0.209371	0	0.626274	0	0	0	0.0619778	0.062419	0.187431
BA_1706	1.61213	1.36102	1.78052	0	0.35122	0.0734232	3.72233	2.88371	1.82805
BA_1707	0	0.166251	0.0815599	0	0	0	0	0	0
BA_1709	0.210798	0.395475	0.582041	0	0	0	0	0	0.0838707
BA_1710	0.38754	0.727058	0.178341	0	0	0	0	0	0
BA_1711	1.73909	0	0.800306	0	0	0	0	0	0
BA_1712	1.28481	1.03304	1.01358	0	0	0	0.543328	0.328317	0.109541
BA_1713	3.79437	0.474571	1.86253	0	0	0	0	0	0
BA_1714	0	1.28621	1.00958	0	0	0	0.108237	0	0
BA_1715	1.13057	1.74675	1.83627	0	0	0	0	0.396533	0.317522
BA_1716	0.303036	1.89507	0.805729	0.0416117	0.110032	0.03067	0.0797372	0.0401524	0.120569
BA_1717	0.372567	1.24815	0.734788	0	0.0579768	0.0484807	0.504169	0.380818	0.0635287
BA_1719	0.989908	0.844159	0.911086	0	0	0	0.213114	0	0.322246
BA_1720	2.5474	3.67625	2.97579	2.78494	2.77488	1.07094	10.6731	9.5807	4.7948
BA_1721	0.33284	1.79525	1.60827	0	0	0	2.36465	2.77839	0.397282
BA_1722	5.46913	5.7603	6.79984	0.948632	1.46325	0.524393	8.86172	5.49218	4.81013
BA_1723	1.56574	4.40618	1.64693	1.10572	1.21826	1.22246	16.1559	4.26777	9.61142
BA_1724	0.409197	6.52535	2.6363	2.02282	6.24035	25.7184	12.5975	6.83157	8.79162
BA_1725	1.31027	1.34082	1.64446	0	0.90827	1.085	2.96188	3.97729	1.56396
BA_1726	0.860934	1.29215	3.96191	8.08626	18.7564	3.92105	24.8737	29.1574	22.6077
BA_1727	1.14981	1.51	0.634954	0	0.375747	0.314203	16.4737	8.36404	5.35248
BA_1728	0	1.75308	1.72006	0	0	0	0.983505	0.247626	0
BA_1729	198.198	200.864	263.609	39.3828	40.6394	2.47793	32.6713	37.0748	13.4521
BA_1730	0.804202	1.72429	1.32173	1.13585	3.19121	0.994154	16.4601	9.65865	5.75944
BA_1731	3.18193	4.8374	3.68595	3.25438	5.25888	1.24929	24.8145	17.0751	12.0488
BA_1732	0	0	0.121489	0	0	0	3.90743	4.72229	0.945336
BA_1733	0.701088	1.09608	0.501872	0.192542	0.509131	0.21287	2.49043	1.95078	2.23154
BA_1734	0.654887	1.84293	0.468799	0	0	0.0662806	0.172319	0	0.347414
BA_1735	0	0.0636619	0.0624629	0	0	0	0.160719	0.323726	0.24302
BA_1736	1.45792	1.40666	1.30349	0.360352	0.136124	0.0758853	1.529	2.48368	1.04411
BA_1737	0.55253	0.777444	0.762802	0.546273	0.481497	0.402632	0.654238	0.395337	1.64877
BA_1738	0.751587	0	0.0768601	0.516025	0.181934	0.152135	1.28546	0.89627	0.299035
BA_1739	20.3238	31.9292	32.3924	11.2312	15.2991	4.81628	40.1082	59.9009	41.0229
BA_1741	0	3.64771	0	0	0	0.393566	2.04642	1.03049	1.03145
BA_1742	0	1.23314	1.71404	0.406156	0.119332	0	0.518857	0	0.261518
BA_1743	0.127523	0.89716	0.762895	0.236397	0.625097	0.638869	3.92591	2.129	0.989382
BA_1744	0.976711	1.93419	1.39835	0.938827	0	0.395408	27.756	11.5179	4.01559
BA_1745	1.93568	5.22028	7.01486	0.448538	1.5814	1.43258	17.763	17.0238	5.48733
BA_1746	73.3136	84.0732	94.7424	9.03725	18.178	5.29458	45.0696	41.5892	34.4661
BA_1747	97.7933	101.067	114.648	33.2883	32.7774	17.7567	52.5818	60.1905	49.2399
BA_1748	15.6367	18.9931	29.8904	2.22976	1.74699	4.01733	41.5403	36.5766	26.0821
BA_1749	40.9197	53.5782	67.4768	32.8708	55.9031	13.6668	117.496	143.951	39.6844
BA_1751	93.0312	112.574	106.942	1.32044	2.57712	1.45985	7.6811	4.68697	6.05774
BA_1753	0	0	0.339352	0	0	0	0	0	0
BA_1754	1.96043	3.49996	2.9102	0.0781543	0	0	0.149761	0.301654	0.754836
BA_1755	204.591	228.573	231.45	6.86451	5.76241	2.58998	6.57696	7.17575	6.47207
BA_1756	12.6127	31.9372	27.846	0.669397	1.09576	1.12773	6.9633	8.12016	9.05132
BA_1757	0	1.91922	0	0	1.33722	0	1.93808	0	0
BA_1758	4.56154	7.6826	4.19833	0.768731	1.58101	0.849893	14.8533	13.3519	13.983
BA_1759	3.3057	4.78615	2.9102	0.710494	0.0782806	0.327294	4.9353	5.39892	4.4604
BA_1760	0	0.109947	0.161814	0.36213	1.08525	0.480436	1.31845	1.67727	0.279805
BA_1762	1.42402	2.07048	1.96595	0.175987	0.155119	0	0.590153	0.0849077	0.50992
BA_1763	0.239324	0.37416	0	0	0	0	0	0	0
BA_1764	11.506	22.3783	13.6987	0.652274	1.14986	0.576912	1.2499	2.89524	1.38597
BA_1766	0.594984	0.790669	1.73409	0	0.0540097	0	0.352253	0.118253	0.295909
BA_1767	76.0788	87.2083	99.3579	35.862	44.9304	6.93902	117.796	54.6259	50.1303
BA_1768	0	0.154629	0.45515	0.20372	0.718252	0	2.34223	0	2.55786
BA_1769	0	0	0	1.46539	0	0	0.468003	0	0
BA_1770	0	0.597872	0	0.225052	0.396731	0.165875	0.539061	0.651478	0.326042
BA_1772	1.62507	2.45868	1.73691	0.25914	0.628133	1.2415	8.87619	3.25068	3.81684
BA_1773	0	0	0	0	0	0	0	0	0
BA_1774	5.48137	5.98313	6.23734	11.7008	14.9814	4.4482	31.3897	31.3755	15.5834
BA_1775	0	0	0	0	0	0	0	0	0
BA_1776	0.336869	0	0.155023	0	0	0	1.79496	1.60687	0
BA_1777	0.856693	0.241084	0.315391	0.105874	0	0.156069	3.95613	2.86051	2.76092
BA_1778	2.04886	2.56255	1.25714	0	0	0.17774	0.231048	0	0.349363
BA_1779	0	0	0.808974	0.93108	0.820675	0.571879	1.04076	1.64712	0
BA_1780	1.32989	0	0.282461	0	0	0	2.30147	0.365977	1.46527
BA_1781	0	2.27489	1.05729	4.89002	8.0642	0.697588	28.5645	16.591	6.85585
BA_1782	3.49876	5.79173	4.73554	29.5044	33.1799	10.1233	75.3014	38.5323	56.2554
BA_1783	0	0.484955	0.422953	0	0.250291	0.313943	2.7887	0.548009	0.274259
BA_1784	6.43722	7.01231	7.93139	2.05301	1.75302	1.13488	8.35979	3.83821	3.09821
BA_1785	0.115746	0.21715	0.266325	1.35892	1.26083	0.263578	5.27652	3.03661	2.83221
BA_1786	9.31394	6.27962	10.3805	1.88846	1.82305	4.63964	8.61596	8.06987	7.12199
BA_1787	3.57569	5.00073	4.24835	6.10626	7.50674	1.42125	7.54404	5.73706	4.8888
BA_1788	0	1.03812	0.727551	0.195386	0.688869	0	3.18242	1.50827	2.83064
BA_1789	0.144323	0	0.265662	0	0	0	1.87978	3.0979	0.861328
BA_1791	0.218067	0.613669	0	0	0	0	0	0	0
BA_1792	0	0.117999	0	0	0	0	0.223423	0	0.300297
BA_1793	0	1.2522	0.136513	0	0	0	0	0	0
BA_1794	0.313632	1.05912	0.923708	0	0	0	0.51991	0	0.074871
BA_1795	0.852792	0.742815	0.448508	0.15056	0.530828	0.554853	3.89484	2.76032	2.54476
BA_1796	0.971717	1.1796	0.263042	0	0	0	0.81218	0.545307	0.818721
BA_1797	3.18326	6.499	4.05	3.7026	5.20129	0.170563	24.1673	14.8492	5.36411
BA_1799	0.656776	0.0513402	1.30971	0.0676395	0.178857	0.199415	0.712867	0	0.457296
BA_1800	6.52611	6.48453	7.96413	0.358456	0.473927	0.748569	0.629641	1.67178	1.03862
BA_1801	3.93377	2.25921	3.02943	0.496075	0.349801	0.43876	1.37835	1.10096	0.814509
BA_1802	0.267964	0	0.443929	0	0	0	0.380748	0.191729	0
BA_1803	0.522473	0.63013	0	0	0	0	0.176757	0	0
BA_1804	7.05654	7.53867	8.03814	2.15328	2.13519	0.674509	3.30093	4.31136	2.93757
BA_1805	0	0	0	0	0	0	0	0	0
BA_1807	4.96882	4.66096	5.43065	0.767587	6.76568	2.54588	21.3276	16.665	14.8271
BA_1808	7.57202	12.0151	10.6165	9.88259	9.48159	1.03136	50.6948	48.8615	33.3648
BA_1809	0.235012	0.661353	0.432598	0	0	0.321102	1.11309	0.140126	0.561027
BA_1810	11.4665	16.3492	10.9756	1.13367	0.832699	0.69631	4.16369	4.55796	5.10966
BA_1811	8.32045	7.32708	10.1064	11.402	18.3119	3.24812	13.2701	8.57222	8.918
BA_1812	0	0.352721	0	0.929403	0	2.05506	0	0	3.14175
BA_1813	1.38665	4.04673	3.97051	0.666432	0.167831	0.491195	1.55068	1.46985	2.29878
BA_1814	0.574905	1.07857	0.95243	0.994691	0.500996	0.209469	2.58678	2.74231	1.64691
BA_1815	3.63871	4.97934	3.23077	0	0.0932623	0.389934	1.01377	1.07203	1.4818
BA_1816	84.6303	86.754	95.1516	5.34835	3.49196	0.584002	6.45284	4.96964	4.01768
BA_1817	8.66748	7.92064	10.1389	2.07323	5.05577	2.19024	10.6602	5.20135	4.9392
BA_1818	20.7833	24.4641	20.6606	22.1938	37.8603	3.4462	155.778	54.9824	57.2614
BA_1819	19.4028	19.4416	18.3652	17.2348	20.5351	7.5314	46.1447	34.7727	31.8443
BA_1820	7.50685	11.5015	9.44246	9.8958	13.3561	4.78651	92.1461	61.7685	57.0472
BA_1821	4.64756	8.57858	7.86508	0.741119	2.93957	0.136561	10.8286	6.07859	10.0211
BA_1822	17.8974	28.6445	24.4643	31.0612	49.291	42.4479	410.472	399.874	306.62
BA_1823	1.36578	1.79362	2.43025	0.450103	1.58692	0.497625	2.04843	3.14881	1.95625
BA_1824	0	0	0	0	0	0	0	0	0
BA_1825	37.3643	59.4806	48.9539	3.0558	3.11243	3.60365	19.5837	21.1646	25.1851
BA_1826	5.73209	6.2399	3.25659	1.83659	3.00636	0.966901	0.754137	1.77218	1.26702
BA_1827	0	0	0.808974	0	0	0	0	0.299476	0
BA_1828	24.5876	21.0428	26.1895	24.1726	24.0147	5.63685	89.7614	56.7967	35.9432
BA_1829	23.7254	34.2392	35.86	1.94074	4.85445	1.85569	26.1328	19.6885	14.3875
BA_1830	22.9198	29.3129	29.9239	4.89836	2.25262	2.72084	11.7669	11.0287	11.4503
BA_1831	64.1016	72.8675	84.4816	6.28132	3.71854	5.94255	10.2399	19.721	14.7592
BA_1832	4.48358	6.49986	4.87686	0.503729	0.591997	0	1.76964	3.40244	1.1352
BA_1833	16.1471	13.2636	18.7977	1.51013	0.47538	0.397517	7.44107	3.43477	2.81288
BA_1834	2.21377	1.87694	2.23341	0.263065	0.139123	0.310229	2.01637	0.964591	1.11793
BA_1835	1.19668	1.95223	2.01124	0.0643005	0.340055	0.33175	3.38838	2.66796	2.79464
BA_1836	0	1.48303	2.2736	1.70963	2.26035	0.180012	5.38204	2.00317	2.71269
BA_1837	14.812	12.9018	17.2842	67.3375	61.9459	21.4426	99.5939	138.153	68.5093
BA_1838	1.21685	1.14146	1.11996	0	0	0	0.360212	0	0
BA_1839	0	0	0	0	0	0	0	0	0
BA_1840	14.3251	10.1799	11.886	13.8142	17.3776	1.38393	36.8795	26.6594	22.9277
BA_1841	5.17682	7.89112	9.52923	1.19958	0	0	0.766219	0.771673	0.77239
BA_1842	329.861	348.178	351.698	40.2335	38.2456	26.2632	45.2033	41.5209	59.0721
BA_1843	0	1.27393	0.416645	0	0	0	0.357347	0	0.180113
BA_1844	1.39127	2.28387	0	0	3.03103	0.633642	7.41317	3.73297	3.73644
BA_1845	0	0	0	0	0	0	0	0	0
BA_1846	115.636	132.942	129.721	13.9541	16.3992	9.45735	71.3041	57.1088	33.4607
BA_1847	35.3324	34.1763	47.1315	0	0	0.250782	0.434663	0.656634	0.657245
BA_1849	9.74972	14.6621	18.9438	1.33879	0.168578	0.70483	6.9633	7.65879	5.17218
BA_1850	106.093	126.962	120.046	3.86663	4.64745	6.36603	52.635	56.2561	58.8305
BA_1851	1.64065	1.2312	5.43604	0.405518	0	0.298888	1.16559	3.52167	3.9166
BA_1852	265.889	231.012	296.089	4.35398	4.96643	12.0814	61.2652	83.3667	88.1442
BA_1853	314.221	277.278	372.743	3.4429	3.17053	13.1425	68.7307	91.0371	88.0447
BA_1854	215.36	164.633	219.215	9.33269	13.9903	11.749	209.576	145.467	104.349
BA_1855	5.99142	6.74424	5.74653	0	0.343498	0.40213	8.51316	3.53479	5.26948
BA_1856	0.194311	0.729089	1.78839	0	0.211664	0	1.1504	0.695152	0.811765
BA_1857	0.24182	0.0756123	0.44513	0	0	0	3.72233	0.672866	0.769706
BA_1858	19.597	22.3066	18.8804	6.58582	8.36403	1.72242	38.1311	27.8794	17.0304
BA_1859	5.94169	6.94551	6.89883	3.27611	3.08679	0.249793	20.3486	12.7539	6.43743
BA_1860	4.89884	5.79716	3.81511	7.07877	8.04552	0.755153	18.7404	12.3129	10.7051
BA_1861	10.0457	18.4412	12.0294	0.667467	0.705984	0.59035	3.19754	5.4101	5.02833
BA_1862	7.16771	11.8956	12.8979	1.13566	2.9029	1.04631	5.82129	3.61626	3.67447
BA_1863	0	0	0	0	0	0	0	0.561771	0
BA_1864	0	0	0	0	0	0	0	0	0
BA_1865	12.2415	12.3817	14.0589	2.17062	3.2467	0.824171	15.5032	2.72919	2.6682
BA_1866	0.255748	0.839658	0.647306	0.158033	0	0	0.757064	0.228736	0
BA_1867	0	0	0	0	0	0	0	0	0
BA_1868	0.516241	0.363192	0.395946	0.0531662	0	0.195931	0.509391	0.410413	0.205398
BA_1869	0	0	0	0	0	0	0.788216	1.19074	0.397282
BA_1870	0	0	0	0	0	0	0	0	0
BA_1871	0	0	0	0	0	0	0	0	0
BA_1872	0	0	0	0	0	0	0	0	0
BA_1873	0	0	0	0	0	0	0	0	0
BA_1874	0.136066	1.02108	0.72008	0.252234	0.62992	0.030985	0.60417	0.405647	0.16241
BA_1875	1.10516	2.30374	0.734615	0.303512	0	0.055926	0.218099	0.219651	0.219855
BA_1876	3.41255	15.6362	7.12725	4.37959	5.86189	0.956441	57.1917	38.6601	16.4497
BA_1877	0.498306	0	0	0	0.651366	0	0	0.713079	0.594785
BA_1878	0.0638197	0	0	0	0	0	0.30227	0	0
BA_1879	0.971064	1.57337	0.406247	0	0.48081	0.0804114	0.313586	0.631636	0.210741
BA_1880	7.68153	8.11259	7.91036	0.464701	2.22353	0.391439	14.6928	6.27766	4.29586
BA_1881	6.16569	10.6147	7.87788	0.806807	0.316061	0.594659	2.74848	3.46005	2.8572
BA_1882	0.454004	0.283916	0.649995	0.0623421	0	0.0459494	0.95569	0.721869	1.08381
BA_1884	9.7271	10.3687	10.0377	8.83376	11.3985	4.22876	40.2245	23.8144	16.0083
BA_1886	3.61913	4.3955	3.71665	0.0470809	0.124494	0.62462	3.78913	1.59004	1.27322
BA_1887	0.299843	0.337518	0.827903	0.148224	0.130648	0	0.639066	0.0715128	0.286317
BA_1888	2.64894	1.67455	2.17302	0.213501	1.00365	0.419631	1.90921	0.824054	0.343675
BA_1889	0	0	0	0.239026	0	0	1.45042	0.922574	0.461716
BA_1890	0.888991	0.83391	1.84096	3.15863	2.54199	1.01221	20.5264	5.56566	4.50972
BA_1891	1.83642	2.96293	1.21694	3.3589	4.96102	0.133821	33.4867	8.05897	6.31288
BA_1892	94.341	124.478	128.431	9.48102	21.3437	9.34882	1343.55	11.003	11.7556
BA_1893	27.0361	49.5064	37.5148	7.93455	11.6775	4.4532	2275.14	13.697	12.3739
BA_1894	69.7239	84.8144	98.5711	3.10575	8.73662	5.6984	856.038	8.60792	7.53095
BA_1895	95.98	97.7976	117.838	25.0292	41.4368	11.5499	3060.77	16.591	10.3002
BA_1896	0	0	0	0	0	0	1.65843	0	0
BA_1897	89.5252	62.1326	107.728	204.085	281.029	30.3046	340.934	893.387	665.339
BA_1898	0	0.284639	0	0	0.165269	0.138199	5.56908	3.34714	1.81095
BA_1899	0	0	0	0	0	0	0.363391	0	0.122106
BA_1900	0	0	0	0	0	0.0652567	0.254486	0	0
BA_1901	3.68692	4.62827	7.33562	7.03572	10.0995	0.3951	27.0282	25.5395	17.7972
BA_1902	0.126097	0	0.270798	0	0	0	0.0497695	0.150371	0.250852
BA_1903	0.903422	0.654846	1.4362	0.456746	0	0.112215	0.0972474	0.146909	0.245077
BA_1904	1.78695	1.67624	0.822333	0.630971	0.278076	0	0.90681	1.06547	5.48468
BA_1905	3.82859	3.19571	3.52374	0.160391	0	0.0886626	0.691527	0.541682	0.658369
BA_1906	1.28305	1.72684	0.821485	0.206824	0.0607663	0	0.79264	0.798282	0.532683
BA_1907	0.865038	1.21716	0.862506	0.623615	1.17786	1.44457	16.9858	10.6595	10.8415
BA_1908	13.8905	8.65182	14.9322	1.37332	0.847331	0.101221	7.76317	15.9019	10.6111
BA_1909	4.66491	11.9255	5.94479	2.21735	2.40114	1.49422	20.0914	17.728	18.4787
BA_1910	1.66023	1.40163	1.83364	0	0	0	0.196584	1.1879	0
BA_1912	0.808878	0.479218	0.117548	0.105226	0	0.0387786	2.26841	3.19838	3.45543
BA_1913	0.224398	0.315743	1.03265	0	0.244438	0.1022	0.53141	2.54216	0.53569
BA_1914	0.806793	0	0.412529	0.664715	0.390596	0	4.35195	2.35181	1.605
BA_1915	0	0.288413	0.141491	0.0949942	0	0.280063	3.45857	0.641639	2.4772
BA_1916	0	0	0.221028	0	0	0	0.284356	0.0954601	0
BA_1917	0	0	0	0	0	0	0.764441	0.384941	0.770598
BA_1918	0	0	0	0	0	0	0	0	0
BA_1919	1.73331	0.97555	1.70165	0.856841	0	0.105256	0.684124	0.551195	0.551708
BA_1920	0	0	0	0	0	0	0	0	0
BA_1921	0.432071	0.12159	0.238601	0	0	0	0.153482	0	0
BA_1922	4.05158	5.02445	3.34975	1.273	1.19685	0.125102	14.3108	10.8914	7.45894
BA_1923	54.6781	49.977	51.7486	1.00177	2.08704	0.738354	8.72548	8.52396	6.59682
BA_1924	2.08303	0.81794	1.02546	0.359205	0.263843	0	0.516237	0.982055	0.636039
BA_1925	0.452201	0.777668	1.45668	0.372567	1.97033	0.0686503	2.32024	1.7975	0.629712
BA_1926	0.139826	0.45907	0.321731	0.172803	0	0	1.4073	1.33395	0.417246
BA_1927	0.711041	0.111164	0.545353	0	0	0	0.280642	0.28264	0.565806
BA_1928	2.28766	3.8539	2.1055	2.5387	1.88168	1.02063	4.14607	5.06637	4.73672
BA_1929	8.15333	8.94998	14.2099	1.71511	1.88967	1.42214	8.01091	15.1015	7.86837
BA_1930	19.1562	19.9367	20.2691	2.33285	1.90391	2.16521	9.93389	13.1727	10.8484
BA_1931	19.2809	21.8794	26.5375	1.52095	1.53211	3.41644	5.96773	16.0039	8.67394
BA_1932	0	0	0	0	0	0	0	0	0
BA_1933	27.7174	27.0975	25.1791	1.4458	1.66648	2.70507	8.20489	18.8875	13.964
BA_1934	6.74796	6.70221	4.10999	1.5943	2.16193	0.994303	4.34755	7.92863	6.15929
BA_1935	3.63995	5.91834	6.92358	0.799719	0.881112	0.515755	6.41708	5.98046	3.47576
BA_1936	3.26622	3.19422	2.7503	3.60712	2.1196	2.46874	37.2757	43.5078	25.1335
BA_1937	0.529671	0.331236	0.487496	0.872789	0.769296	0.160823	1.4634	2.10545	1.58056
BA_1938	0	0.238151	0.467332	1.09815	0.41483	0	0	0.454132	1.06063
BA_1939	1.36734	1.76361	1.25847	0.422456	0	0	0.404759	0.61146	0
BA_1940	0	0	1.02933	0.82929	0.730955	0	0	1.60041	0
BA_1941	20.7277	24.0097	15.0306	22.1231	41.2233	2.00248	79.7655	81.8313	60.9151
BA_1942	13.3193	15.7722	16.5675	6.43755	8.76268	3.72377	22.4074	14.9397	14.7962
BA_1943	42.4422	43.3008	44.3562	35.0497	27.4369	35.2726	10.8024	31.751	37.2253
BA_1944	25.6755	33.5259	39.1331	14.977	10.8144	29.1251	9.08	25.8825	31.9542
BA_1945	32.5711	31.4662	41.7372	14.0359	10.8693	33.5849	8.88524	22.3954	23.5782
BA_1946	10.0472	10.4088	10.5098	4.23865	4.04371	6.10119	2.57999	5.43729	5.39419
BA_1947	0.500457	1.64307	2.53334	0	0	0.455858	0	0.298399	0
BA_1948	35.2497	42.722	48.2337	5.58996	11.2134	1.84694	17.3602	23.0637	10.6117
BA_1949	0.833928	1.89046	1.08733	0.0858839	0	0.0633009	0.905149	0.911591	1.74193
BA_1950	0.568197	0.837559	0.373538	0	0.530518	0.0739372	0.768901	0.677577	0.193774
BA_1951	100.687	73.9684	86.5773	27.8433	42.6317	5.18338	198.702	113.976	121.29
BA_1952	171.042	163.496	212.569	99.9347	214.838	21.2386	441.736	167.093	234.292
BA_1953	0.182103	0.939513	0	0.225052	1.09101	0.580562	2.15625	1.41153	1.41285
BA_1954	0.592871	1.44596	1.16408	0.390772	0.430543	0.180012	0.514803	0.565601	0.471773
BA_1955	0.811236	1.71219	2.05326	0.375961	0	0	1.20071	0.362776	1.33142
BA_1956	0.527496	0.618516	0.0606867	0.0814879	0.215476	0.0600609	0.234223	0.23589	0
BA_1957	0.355521	0.444657	0.654424	0.439368	3.61451	0.323838	5.75317	4.66356	3.25338
BA_1958	2.96218	0.0896339	1.49508	1.06281	0.936787	0.174077	10.6355	7.17878	4.67625
BA_1959	0	0	0	0	0	0	0	0	0
BA_1960	97.8835	120.779	123.57	16.07	17.119	22.9623	154.724	131.472	95.5058
BA_1961	0.841155	0.236711	1.08385	0	0	0.0766194	0.0995992	0.401232	0.301204
BA_1962	0	1.52938	0	0	1.77599	0	1.28701	0.648084	0.648687
BA_1963	1.33136	2.80996	2.14436	6.17008	3.98819	4.54767	32.3168	34.9283	36.1527
BA_1964	64.4149	94.7678	74.0283	59.9526	100.328	12.2977	343.293	204.113	163.196
BA_1965	1.09034	0.204556	0.401407	1.75174	2.25664	0.099317	6.0679	6.89123	1.43159
BA_1968	23.6892	15.3182	23.4839	1.3941	1.93096	3.52295	7.69621	12.0429	6.60409
BA_1969	139.982	103.493	149.834	6.98809	9.23918	13.1759	22.7331	43.516	23.0732
BA_1970	394.011	322.906	365.434	144.502	142.387	52.224	307.429	264.842	251.234
BA_1971	0	0	0	0	0	0	0.394108	3.1753	0
BA_1972	0.27256	0.255673	0.0557462	0	0.131956	0	0.358592	0.0722288	0.18074
BA_1973	12.092	7.10552	13.4957	4.98126	8.47839	0.69631	31.8448	17.1545	18.0829
BA_1974	0.0557847	0.104657	0.154028	0	0	0.101627	0.330267	0.332618	0.199756
BA_1975	1.41348	1.2312	1.9514	0	0	0	0.358644	0.240798	0.241022
BA_1976	0.0497949	0.326968	0.13749	0.184616	0	0	0.176883	0.653188	0.0594359
BA_1977	5.84638	11.8426	9.66996	0.523567	0.646077	0.848972	4.91603	3.13228	2.12384
BA_1978	0.954377	0.298415	0.0975983	0.131051	0	0	0.251124	0.379366	0
BA_1979	3.47817	3.74248	4.42522	4.93062	1.89439	0.745461	9.08477	7.07556	4.2737
BA_1980	0	0	0	0	0	0	2.52955	1.27378	0.478111
BA_1981	164.059	201.391	179.998	162.905	160.52	38.0956	267.106	139.849	143.928
BA_1982	550.869	572.796	642.822	41.0204	46.1745	40.9902	207.266	174.034	144.38
BA_1983	226.671	229.916	298.971	11.3886	16.2814	16.4297	83.1669	86.1711	57.3444
BA_1984	140.139	99.8971	165.067	10.3164	8.26643	7.14288	36.8412	42.5332	33.2128
BA_1985	121.506	99.9712	130.068	30.1725	44.787	11.8606	84.212	62.195	49.4137
BA_1986	153.75	124.462	177.398	48.3963	106.914	20.7702	385.43	242.756	137.368
BA_1987	2052.12	1518.57	2065.88	30.8823	53.3372	7.38224	52.7798	37.8532	11.689
BA_1988	7.24979	5.39731	9.63809	0.142216	0.188029	0.262052	4.01964	3.22488	1.64828
BA_1989	3.85205	1.27531	3.6496	0.700079	0.987305	0.206398	2.14641	0.945739	1.62278
BA_1990	0	0	0	0	0	0	0	0	0
BA_1991	1.14665	0	0	0	0	0	0	0	0
BA_1992	0.288346	0.13524	0.132693	0	0.078524	0.131325	1.3657	0.773672	0.172087
BA_1993	0	0.466096	0	0	0	0	0	0	0
BA_1994	0.832542	1.21483	0.425695	0.80025	1.61225	0.337044	2.08112	1.43406	1.21456
BA_1995	1.97896	2.7564	2.87006	6.37362	9.73325	1.58411	21.5152	14.7316	7.37267
BA_1996	3.17803	3.31236	2.92498	5.23674	5.38507	0.321646	19.2333	13.0538	14.3304
BA_1997	1.50897	0.283095	1.80546	0	1.31498	0.13745	3.57347	3.23902	3.24203
BA_1998	31.8053	26.4843	30.7599	0.210195	0.370541	0.852086	4.22919	3.65082	2.23313
BA_1999	0.333727	0.800016	0.409538	0.274957	0.767451	0.101329	2.0636	0.840161	1.06224
BA_2000	0	2.501	0.669246	0.898639	2.90429	0	56.8257	46.2466	59.3086
BA_2001	432.026	568.735	533.56	92.0329	114.78	242.385	165.864	357.317	219.554
BA_2002	0	0	0.207872	0	1.9682	1.23437	4.81375	4.04001	8.08753
BA_2003	0.297598	0.348949	0.342377	0	0.162087	0.135538	0	0	0.266413
BA_2004	1.42087	1.49944	0.817334	0.365829	1.09633	0.161781	2.31333	2.18859	2.33196
BA_2005	5.17026	17.1952	17.7365	51.4076	54.0157	21.1928	104.352	146.012	72.0919
BA_2006	21.4504	35.7296	28.7833	30.7212	26.2048	15.5215	137.202	128.377	83.7498
BA_2007	0.923993	0.619103	1.0934	0.326261	0	0.360707	0	0.472228	0.315112
BA_2008	36.7529	42.4684	42.0782	16.1095	22.511	21.4882	70.849	67.1069	49.2575
BA_2009	0.807245	0.0658461	0.904483	0.303627	0.114696	0.223789	0.955841	1.38119	0.377037
BA_2010	0	0.213946	0.209916	1.12747	0	2.28527	7.83176	11.6953	13.3396
BA_2011	0.189031	0	0.869898	0	1.44138	0.516556	3.13359	3.38131	1.35378
BA_2012	29.8989	35.3875	31.0888	0.495979	0.510028	0.609271	2.45522	1.03693	0.558869
BA_2013	10.2068	11.0474	14.0189	11.0616	12.1446	2.14552	41.4632	45.5034	24.7409
BA_2014	1029.23	1143.87	1201.27	1541.98	3476.85	103.332	2277.9	2622.47	3186.6
BA_2015	0	0.276498	0.0678225	1.00177	0.321083	0.335616	1.65784	0.966634	1.05549
BA_2016	12.7869	14.211	18.1648	0.429419	0.908399	0.759611	2.3863	3.56349	2.73732
BA_2017	0.728414	0	0.335207	0	0	0	0	0	0
BA_2018	0.336288	0.49571	1.23804	0	0	0.0437598	0.341306	0	0.114685
BA_2019	1.42939	0.558677	1.31557	0.294417	0.519011	0	2.96188	0.426138	0.284356
BA_2020	2.77637	1.73623	3.83295	0.0953102	0.0840085	0.421491	1.5524	1.19558	0.920532
BA_2021	2.19674	2.2667	1.95443	0.271483	1.59528	0	10.3177	7.16031	4.54491
BA_2022	0	0	0.408667	0	0.161225	0	2.62878	0.882498	1.76664
BA_2023	0	0	0	0	0	0	0	0	0
BA_2024	0	0	0	0.368969	0	0	0	0.712058	0.35636
BA_2025	0	0	0	0	0.924093	0	0.502247	1.01164	0
BA_2026	0	1.68179	0	1.77257	0	0	8.4916	7.26924	12.412
BA_2027	0	0	0	0	0	0	0	0	0
BA_2028	0	0	0	0	0	0	0	0	0
BA_2029	182.02	180.93	195.237	125.727	95.9925	97.3004	222.363	185.747	183.294
BA_2031	0	0	0	0	0	0	0	0	0
BA_2032	0.623888	2.77986	1.00487	2.6986	6.62612	1.70487	11.8197	10.6019	10.2394
BA_2033	0	0	0.158476	0	0.375127	0	1.01941	1.02667	1.02762
BA_2035	58.2869	79.7466	86.8037	25.5194	36.133	10.1383	33.8145	23.3147	20.0151
BA_2036	0	0	0	0	0	0	0	0	0
BA_2037	8.33918	10.7931	9.13248	2.87001	5.28935	1.05767	34.6223	20.3925	16.3796
BA_2038	6.03733	5.85205	6.35923	2.81868	3.28824	1.772	7.78411	7.83951	6.64576
BA_2039	3.53974	3.17605	4.24941	0.950993	1.17352	0	3.28016	6.23996	1.10219
BA_2040	8.51518	12.69	11.1237	5.17686	11.4449	2.9399	38.5416	24.8946	18.1146
BA_2041	92.3884	93.6177	119.183	187.363	212.363	42.4208	601.821	470.161	216.303
BA_2042	6.85602	5.64693	3.23201	1.85992	1.27507	0	8.31606	4.78585	3.99192
BA_2043	1.75597	1.77388	2.36207	0	0	0	1.75933	1.61077	1.93473
BA_2044	2.93136	4.01885	3.32056	0.55734	0	0	1.86898	2.15118	0.538295
BA_2045	35.1544	30.2963	44.3598	7.98291	5.41254	3.05506	18.9742	10.5175	13.3444
BA_2046	0.19395	0.727734	0.297511	0	0	0.235555	1.30136	1.15643	1.08034
BA_2047	1.24019	0.105759	0.933907	0	0	0	0.800991	0.806692	0.403721
BA_2048	13.0576	18.969	15.3148	8.71122	11.5803	1.26307	35.5745	20.2564	21.6545
BA_2049	1.0089	2.22401	1.8107	0	0.0549497	0	0.119461	0.0601558	0.120424
BA_2050	0.221775	0	0	0	0	0	6.12731	0.705248	1.50005
BA_2051	1.47512	0.509793	2.35805	0.0959484	0	0.282876	1.01122	1.75909	1.48271
BA_2052	4.0025	7.28376	7.29393	9.49723	10.8998	4.01039	15.2605	16.5146	5.54183
BA_2053	6.049	10.4457	9.4898	0.849504	6.13992	1.00181	13.8366	8.36106	7.38427
BA_2054	0.315338	0.2958	1.16091	0	0	0	0.448061	0	0
BA_2055	295.873	295.35	287.97	1.87707	2.81263	0	1.25891	1.08674	1.26905
BA_2056	0	0	0	0	0.423328	0	0	0	0.463866
BA_2057	0	0	0.413061	0	0	0.204401	0	0	0
BA_2058	0.721613	0.947664	0.531323	1.96196	0.314422	0	6.3229	2.58158	1.37812
BA_2059	1.54349	1.1483	1.22465	0.328882	0.579768	0.436326	4.22241	4.189	1.7788
BA_2060	0	0	0	0	0	0	0.379142	0	0
BA_2061	6.55854	5.44619	8.70812	7.83959	18.2705	3.3298	90.1343	121.804	90.6037
BA_2063	11.1863	21.5722	19.4899	12.1528	7.31119	20.5211	138.369	91.8893	94.0242
BA_2064	17.5495	24.7923	29.9689	4.44221	5.98835	0.385193	5.25757	9.58141	4.29041
BA_2065	11.7479	13.8679	12.3918	2.44696	0.718934	0.360707	4.06372	6.76861	5.82957
BA_2066	4.10539	4.70681	6.50741	0.845604	0.993779	0.207752	4.32097	5.98362	4.62801
BA_2067	2.35012	1.10225	2.16299	0.290438	0	0	1.9479	3.36303	3.08565
BA_2068	6.93224	7.97291	8.93236	0.446983	0.0656635	0.0549083	0.785142	0.503192	0.719514
BA_2069	0.979768	0.262589	0.772931	1.38382	1.21973	0.892454	0.994389	2.67058	0.501199
BA_2070	4.98225	5.02628	5.62377	0	0	0.0856273	0	0.896809	0.785438
BA_2071	16.845	24.7261	18.0876	17.3482	13.2522	4.97253	14.7746	24.9236	12.4734
BA_2072	9.76247	12.1659	11.6329	13.2889	16.3881	5.75648	23.6775	14.9037	10.2453
BA_2073	0.11348	0.212899	0.417778	0.140244	0	0	0.873402	0.202989	0.541807
BA_2074	19.5038	25.3086	23.336	3.61555	1.77046	0.444142	22.3242	15.5056	10.864
BA_2075	87.8014	111.1	121.879	5.61253	7.22421	8.27346	15.7055	19.2558	14.8855
BA_2076	0.707426	0	0	0	0	0	0.418823	0	0
BA_2077	0.358575	0	0.247517	0.221572	0	0	1.37989	0.213801	0.107
BA_2078	0.452691	0	1.24994	2.05134	2.79433	0.412348	10.3631	7.01787	6.66417
BA_2079	3.07856	4.88707	5.3944	1.02432	1.22531	0.701051	1.75252	1.2002	1.20131
BA_2080	0.780516	1.37279	1.16735	0.482299	0.318832	0	6.58486	4.18846	3.37718
BA_2081	0.548979	0.662098	1.37144	1.35691	1.79401	0.0714365	5.47886	3.74092	3.55718
BA_2082	4.99146	5.0538	6.05243	1.37082	2.33023	0.866026	2.7206	2.07859	4.53933
BA_2083	4.20376	6.15803	7.52606	2.20618	3.70096	1.3638	7.43226	1.57944	3.23055
BA_2084	0.987884	2.39391	1.36383	0.508697	1.16578	0.524911	36.1642	17.6709	16.8029
BA_2085	6.90666	10.9999	11.1128	3.86864	3.03103	2.76087	6.35414	5.51057	7.41357
BA_2086	0	0	0	0	1.61607	0	2.53742	0.982877	1.77082
BA_2087	1.29737	1.56469	0.966622	0.229049	0.201889	0.675285	4.31594	4.34666	2.13848
BA_2088	2.36253	3.32423	2.17442	6.00166	4.57513	1.91288	66.5165	57.2858	37.7561
BA_2089	2.12312	0.937213	2.2989	0	0.54417	0	0.887273	0	0
BA_2090	0	0	0	0	0	0	0	0	0
BA_2091	0.14343	0	0	0	0	0	0.339664	0.171041	0
BA_2092	0	0	0	0	0	0	0	0	0.549881
BA_2093	0	0	0	0	0	0	0	0	0
BA_2094	0	0	0	0	0	0	0.445235	0	0
BA_2095	0	0	0	0	0	0	0	0	0
BA_2096	0	0	0.340556	0	0	0	0.876261	0	0
BA_2097	0	0	0	0	0	0	0	0.434318	0.869445
[truncated: 3,637 more rows]

## Sheet: Δ-vs-A16R_DiffExpr_fdr0.01
ID	logFC	logCPM	PValue	FDR	-LOG10(PValue)	DEG	Description
BA_2399	2.11752	-0.092274	0.0398148	0.0763616	1.39996	no_significant	Zn-dependent hydrolase
BA_3131	-0.571892	1.79234	0.359727	0.461847	0.444027	no_significant	zinc-type alcohol dehydrogenase
BA_4503	1.35638	0.682075	0.0234289	0.0484236	1.63025	no_significant	zinc-specific transcriptional regulator
BA_5214	-2.40826	4.45188	1.79e-05	9.06e-05	4.74732	down_regulated	zinc-dependent sulfurtransferase SufU
BA_2647	0.0741631	-1.09779	0.916385	0.947345	0.037922	no_significant	zinc-binding alcohol dehydrogenase
BA_3922	-1.68277	4.40034	0.000810755	0.00265679	3.09111	down_regulated	zinc protease
BA_3942	3.109	4.28005	3.44e-06	2.03e-05	5.46319	up_regulated	zinc protease
BA_5625	1.01815	4.24336	0.0340713	0.066591	1.46761	no_significant	zinc metalloprotease
BA_2035	0.491765	5.27238	0.261867	0.356214	0.581919	no_significant	zinc ABC transporter substrate-binding protein
BA_4504	0.536327	-0.256205	0.447866	0.55174	0.348852	no_significant	zinc ABC transporter permease
BA_4505	0.00261117	0.0284832	1	1	0	no_significant	zinc ABC transporter ATP-binding protein
BA_0020	-1.32293	3.63979	0.00946962	0.0221151	2.02367	no_significant	YbaB/EbfC family DNA-binding protein
BA_1591	0.333029	-0.854953	0.682742	0.766172	0.165743	no_significant	xanthine phosphoribosyltransferase
BA_1592	-0.740242	0.881426	0.307114	0.406075	0.5127	no_significant	xanthine permease
BA_2860	4.06269	7.41174	8.99e-17	3.18e-15	16.0464	up_regulated	Xaa-Pro dipeptidyl-peptidase
BA_4861	0.711285	3.98604	0.195447	0.279324	0.708971	no_significant	Xaa-Pro dipeptidase
BA_1901	2.16589	3.03167	0.00196187	0.00577844	2.70733	up_regulated	Xaa-Pro aminopeptidase
BA_2498	2.24582	6.13711	9.91e-05	0.00041736	4.00379	up_regulated	Xaa-His dipeptidase
BA_4690	-0.884247	5.45131	0.0406975	0.0778417	1.39043	no_significant	valine--tRNA ligase
BA_3288	2.24057	-0.105852	0.000366779	0.00132532	3.4356	up_regulated	UV-damage repair protein UvrX
BA_0248	0.241015	0.4151	0.791333	0.858707	0.101641	no_significant	UV damage endonuclease UvdE
BA_5592	-3.54061	0.316424	3.79e-05	0.000178603	4.42162	down_regulated	UV damage endonuclease
BA_5152	1.39914	6.44545	0.00300968	0.00830625	2.52148	up_regulated	UTP--glucose-1-phosphate uridylyltransferase
BA_4695	-1.81214	3.03288	0.00247238	0.00698848	2.60688	down_regulated	uroporphyrinogen-III synthase
BA_1445	0.670354	-1.53401	0.776678	0.847013	0.109759	no_significant	uroporphyrinogen-III C-methyltransferase
BA_1070	-2.86897	2.88727	0.000112963	0.000468562	3.94706	down_regulated	uroporphyrinogen decarboxylase
BA_2144	-3.33926	2.57483	3.39e-09	3.52e-08	8.47042	down_regulated	uroporphyrin-III C-methyltransferase
BA_3711	-1.58396	5.8357	0.000905543	0.00292304	3.04309	down_regulated	urocanate hydratase
BA_1797	1.40236	1.48589	0.0512392	0.0942336	1.2904	no_significant	uridylate kinase
BA_3963	-2.32761	4.4114	2.65e-05	0.000128185	4.57711	down_regulated	uridylate kinase
BA_3009	6.65618	-1.77316	0.000928095	0.00298895	3.03241	up_regulated	uridine kinase
BA_4608	1.03046	2.73725	0.0300873	0.0600319	1.52162	no_significant	uridine kinase
BA_1552	-0.121482	0.599196	0.82936	0.887379	0.0812571	no_significant	uracil-DNA glycosylase
BA_5648	-1.11915	-0.257459	0.166179	0.244988	0.779423	no_significant	uracil-DNA glycosylase
BA_5557	-0.440263	3.29359	0.331299	0.430341	0.47978	no_significant	uracil phosphoribosyltransferase
BA_4029	0.545435	2.85899	0.285142	0.381823	0.544939	no_significant	uracil permease
BA_0654	4.22396	-1.5964	0.00726697	0.0176778	2.13865	no_significant	universal stress protein
BA_4875	1.22491	11.0285	0.0280786	0.0566448	1.55162	no_significant	universal stress family protein
BA_5435	1.19584	4.07375	0.0108984	0.0249258	1.96264	no_significant	undecaprenyl-phosphate N-acetylglucosaminyl 1-phosphate transferase
BA_0283	0.157121	2.3219	0.728161	0.806384	0.137773	no_significant	undecaprenyl-diphosphatase
BA_0683	3.65081	-0.0276207	2.03e-05	0.000101498	4.69158	up_regulated	undecaprenyl-diphosphatase
BA_1403	2.02204	1.56147	0.00016519	0.000652996	3.78202	up_regulated	undecaprenyl-diphosphatase
BA_4526	1.6634	-0.317187	0.0772842	0.132352	1.11191	no_significant	undecaprenol kinase
BA_0246	-1.62396	2.46341	0.000980721	0.00312968	3.00845	down_regulated	UDP-N-acetylmuramoyl-tripeptide--D-alanyl-D-alanine ligase
BA_4053	-0.0918917	3.62687	0.842236	0.896594	0.0745662	no_significant	UDP-N-acetylmuramoyl-L-alanyl-D-glutamate--2,6-diaminopimelate ligase
BA_4051	0.98116	4.61605	0.0432848	0.0818966	1.36366	no_significant	UDP-N-acetylmuramoylalanine--D-glutamate ligase
BA_4938	-0.597698	5.6749	0.153525	0.230451	0.813822	no_significant	UDP-N-acetylmuramate--L-alanine ligase
BA_4049	-1.37292	1.71249	0.0225847	0.0471187	1.64619	no_significant	UDP-N-acetylglucosamine--N-acetylmuramyl-(pentapeptide) pyrophosphoryl-undecaprenol N-acetylglucosamine transferase
BA_4477	-0.114289	5.28089	0.790316	0.85813	0.102199	no_significant	UDP-N-acetylglucosamine--N-acetylmuramyl-(pentapeptide) pyrophosphoryl-undecaprenol N-acetylglucosamine transferase
BA_0048	-1.05472	3.49074	0.0269263	0.0546258	1.56982	no_significant	UDP-N-acetylglucosamine pyrophosphorylase/glucosamine-1-phosphate N-acetyltransferase
BA_5433	-1.23854	5.19856	0.0124517	0.0280363	1.90477	no_significant	UDP-N-acetylglucosamine 2-epimerase
BA_5509	-0.729296	3.38522	0.124917	0.194882	0.903378	no_significant	UDP-N-acetylglucosamine 2-epimerase
BA_5529	-0.382573	7.92359	0.34966	0.450573	0.456354	no_significant	UDP-N-acetylglucosamine 1-carboxyvinyltransferase
BA_5578	-1.26211	6.02877	0.00627722	0.0156225	2.20223	no_significant	UDP-N-acetylglucosamine 1-carboxyvinyltransferase
BA_4048	-2.17821	-0.232351	0.059836	0.107003	1.22304	no_significant	UDP-N-acetylenolpyruvoylglucosamine reductase
BA_5315	0.390666	1.90918	0.454987	0.558574	0.342001	no_significant	UDP-N-acetylenolpyruvoylglucosamine reductase
BA_2083	0.894098	2.21211	0.0513092	0.094321	1.2898	no_significant	UDP-glucosyltransferase
BA_2638	0.0947048	1.82888	0.832187	0.889306	0.0797792	no_significant	UDP-glucosyltransferase
BA_5512	0.741759	4.55786	0.174779	0.255339	0.75751	no_significant	UDP-glucose/GDP-mannose dehydrogenase
BA_5434	-1.80136	-0.985527	0.068016	0.119198	1.16739	no_significant	UDP-glucose 6-dehydrogenase
BA_5505	-0.372347	3.49435	0.415695	0.520515	0.381226	no_significant	UDP-glucose 4-epimerase
BA_5700	-0.112277	0.90418	0.914961	0.947051	0.0385976	no_significant	UDP-glucose 4-epimerase
BA_4911	1.05445	3.1723	0.0232251	0.0480968	1.63404	no_significant	tyrosine--tRNA ligase
BA_5314	1.72197	2.87088	0.000439818	0.00154672	3.35673	up_regulated	tyrosine--tRNA ligase
BA_3394	0.94585	-0.0610875	0.168719	0.248123	0.772837	no_significant	tyrosine-protein phosphatase
BA_4311	-3.41481	4.48624	8.77e-11	1.22e-09	10.0569	down_regulated	tyrosine recombinase XerD
BA_3969	-3.45567	5.67178	1.26e-06	8.07e-06	5.89983	down_regulated	tyrosine recombinase XerC
BA_0065	-2.74242	0.107017	0.00123214	0.003819	2.90934	down_regulated	type III pantothenate kinase
BA_0394	1.50816	4.85567	0.000386372	0.00138659	3.41299	up_regulated	type I phosphodiesterase/nucleotide pyrophosphatase family protein
BA_1188	0.365087	2.7438	0.403406	0.508306	0.394258	no_significant	tryptophan--tRNA ligase
BA_3408	-0.0793719	3.01076	0.9256	0.953484	0.0335765	no_significant	tryptophan--tRNA ligase
BA_1253	-1.07355	2.14695	0.0371516	0.0719096	1.43002	no_significant	tryptophan synthase subunit beta
BA_1254	1.43304	3.21409	0.0275291	0.0556135	1.56021	no_significant	tryptophan synthase subunit alpha
BA_2751	-1.14706	3.88538	0.0184729	0.0394202	1.73346	no_significant	tryptophan 2,3-dioxygenase
BA_4625	0.970145	6.39409	0.0232384	0.0481008	1.63379	no_significant	tRNA-specific 2-thiouridylase MnmA
BA_0075	-1.5731	1.44852	0.00980014	0.022748	2.00877	no_significant	tRNA-dihydrouridine synthase
BA_0334	-2.40681	1.7784	1.86e-05	9.36e-05	4.73031	down_regulated	tRNA-dihydrouridine synthase
BA_4943	-0.51003	3.43071	0.272268	0.367981	0.565004	no_significant	tRNA-binding protein
BA_3908	-1.50089	4.29568	0.018226	0.0389921	1.73931	no_significant	tRNA-2-methylthio-N(6)-dimethylallyladenosine synthase
BA_4805	-0.80471	2.28554	0.178733	0.260031	0.747796	no_significant	tRNA/rRNA methyltransferase
BA_0062	-1.50748	3.11081	0.000979265	0.0031274	3.0091	down_regulated	tRNA(Ile)-lysidine synthase
BA_5733	-1.56931	5.69844	0.000266613	0.000995008	3.57412	down_regulated	tRNA uridine 5-carboxymethylaminomethyl modification protein GidA
BA_4630	-0.82334	1.55687	0.0970492	0.159076	1.01301	no_significant	tRNA threonylcarbamoyladenosine dehydratase
BA_0258	-6.33526	-1.18626	0.00325729	0.00888467	2.48714	down_regulated	tRNA threonylcarbamoyladenosine biosynthesis protein TsaE
BA_0259	-2.15121	0.0968926	0.00409381	0.0108123	2.38787	no_significant	tRNA threonylcarbamoyladenosine biosynthesis protein TsaB
BA_4899	-2.955	2.80953	1.76e-06	1.09e-05	5.75329	down_regulated	tRNA sulfurtransferase
BA_3947	-0.0123899	0.0155084	0.961224	0.980337	0.0171752	no_significant	tRNA pseudouridine synthase B
BA_0142	-2.26418	1.86845	0.0017709	0.00526215	2.75181	down_regulated	tRNA pseudouridine synthase A
BA_0487	1.83415	3.8817	8.02e-05	0.000346895	4.09556	up_regulated	tRNA pseudouridine synthase A
BA_1094	-1.62046	5.71106	0.00138458	0.0042384	2.85868	down_regulated	tRNA nuclease
BA_0261	-1.00414	3.19928	0.0244421	0.0503693	1.61186	no_significant	tRNA N6-adenosine threonylcarbamoyltransferase
BA_5734	-1.42628	2.83715	0.00771641	0.0185671	2.11258	no_significant	tRNA modification GTPase MnmE
BA_4950	0.463147	-0.407759	0.5891	0.68138	0.229811	no_significant	tRNA (guanine-N(7)-)-methyltransferase
BA_3979	-3.39073	2.2429	1.85e-09	1.99e-08	8.73337	down_regulated	tRNA (guanine-N(1)-)-methyltransferase
BA_0547	2.34704	2.98204	4.45e-07	3.09e-06	6.35208	up_regulated	tRNA (cytidine(34)-2\'-O)-methyltransferase
BA_4513	-0.954559	0.294945	0.153489	0.230451	0.813923	no_significant	tRNA (adenine(22)-N(1))-methyltransferase
BA_0091	-1.06523	3.5363	0.0952432	0.156788	1.02117	no_significant	TrmH family tRNA/rRNA methyltransferase
BA_0333	-2.49436	0.640446	0.000502618	0.00174712	3.29876	down_regulated	TrmA family RNA methyltransferase
BA_1210	0.948458	-0.297619	0.259591	0.353804	0.585711	no_significant	triphosphatase
BA_5366	-3.33692	7.29051	3.84e-07	2.72e-06	6.41589	down_regulated	triosephosphate isomerase
BA_4705	0.268357	7.82964	0.60017	0.690308	0.221725	no_significant	trigger factor
BA_0632	1.81722	2.47524	9.32e-05	0.000396549	4.03037	up_regulated	trehalose-6-phosphate hydrolase
BA_0630	1.41752	0.753773	0.0265837	0.0540673	1.57538	no_significant	trehalose operon transcriptional repressor
BA_0829	5.04652	1.98869	4.13e-12	7.35e-11	11.3846	up_regulated	transporter
BA_0832	2.76644	0.294079	0.00200776	0.00589709	2.69729	up_regulated	transporter
BA_0833	4.49597	2.85991	3.27e-14	8.08e-13	13.4858	up_regulated	transporter
BA_2310	1.76016	2.9217	0.000124652	0.000512	3.9043	up_regulated	transporter
BA_3157	0.0586952	-1.80264	1	1	0	no_significant	transporter
BA_3516	3.14441	2.1802	3.12e-08	2.68e-07	7.50569	up_regulated	transporter
BA_3614	3.38958	3.5514	1.21e-10	1.64e-09	9.91561	up_regulated	transporter
BA_3625	-0.00525116	-0.602493	1	1	0	no_significant	transporter
BA_5163	1.94774	0.802405	0.00163396	0.00491942	2.78676	up_regulated	transporter
BA_5475	-1.57981	-0.850798	0.145651	0.220952	0.836686	no_significant	transporter
BA_5698	3.84777	-0.927243	0.00275445	0.00768759	2.55997	up_regulated	transporter
BA_2559	-3.16242	0.445937	0.000193333	0.000752923	3.71369	down_regulated	transpeptidase
BA_5069	-6.13705	-1.3211	0.00478408	0.0123296	2.3202	no_significant	transpeptidase
BA_5252	-1.90616	2.3433	0.000129574	0.000530661	3.88748	down_regulated	transpeptidase
BA_4796	1.89013	1.4332	0.000114261	0.000472871	3.9421	up_regulated	transmembrane protein
BA_3932	-11.4887	3.24274	1.46e-23	1.29e-21	22.8356	down_regulated	translocation-enhancing protein TepA
BA_4819	-1.76337	5.3847	0.000149216	0.00059658	3.82618	down_regulated	translation initiation factor IF-3
BA_3950	-1.51296	7.79624	0.00036083	0.00130495	3.4427	down_regulated	translation initiation factor IF-2
BA_0133	-2.50713	1.9745	3.92e-05	0.000183384	4.40626	down_regulated	translation initiation factor IF-1
BA_0108	-3.1949	11.3371	1.69e-08	1.56e-07	7.77124	down_regulated	translation elongation factor Tu
BA_0107	-3.92683	10.2443	3.02e-11	4.48e-10	10.5196	down_regulated	translation elongation factor G
BA_3432	-5.09139	3.30244	1.62e-16	5.49e-15	15.7912	down_regulated	transketolase
BA_3744	-0.395838	8.2121	0.349129	0.450165	0.457014	no_significant	transketolase
BA_0034	3.51649	3.50703	4.25e-10	5.31e-09	9.37111	up_regulated	transition state transcriptional regulator AbrB
BA_2000	2.20284	-1.26903	0.087139	0.145728	1.05979	no_significant	transition state transcriptional regulator
BA_5010	1.77552	3.2887	6.88e-05	0.000302509	4.16267	up_regulated	transferase
BA_0052	-1.99173	6.13488	1.39e-05	7.24e-05	4.85668	down_regulated	transcription-repair coupling factor
BA_3305	2.99322	-0.220333	0.000114339	0.000472871	3.94181	up_regulated	transcriptional repressor PagR
BA_4521	-2.01262	3.53276	0.000226984	0.000870277	3.64401	down_regulated	transcriptional repressor CcpN
BA_1292	-0.516763	7.0967	0.297333	0.395254	0.526757	no_significant	transcriptional regulator SinR
BA_0612	2.11901	2.65745	0.0097667	0.022708	2.01025	no_significant	transcriptional regulator PagR
BA_4428	-1.24238	0.737077	0.0339485	0.0664128	1.46918	no_significant	transcriptional regulator MntR
BA_5506	0.89182	0.164707	0.164873	0.24366	0.782851	no_significant	transcriptional regulator LytR
BA_0077	-0.866636	0.244184	0.234742	0.32585	0.629409	no_significant	transcriptional regulator CtsR
BA_3138	-5.15778	-1.95843	0.0815445	0.137797	1.08861	no_significant	transcriptional regulator AnsR
BA_0597	4.02093	5.66425	5.14e-09	5.19e-08	8.28864	up_regulated	transcriptional regulator
BA_0648	0.763011	-1.18631	0.493256	0.595817	0.306928	no_significant	transcriptional regulator
BA_0783	3.77663	3.7214	1.54e-12	2.99e-11	11.8123	up_regulated	transcriptional regulator
BA_1509	-0.840596	2.70543	0.094593	0.155934	1.02414	no_significant	transcriptional regulator
BA_2769	1.93601	3.61521	0.00557885	0.0141609	2.25346	no_significant	transcriptional regulator
BA_2836	0.194383	0.491336	0.793888	0.860591	0.100241	no_significant	transcriptional regulator
BA_2979	-9.73516	5.64063	1.13e-34	7.92e-32	33.9468	down_regulated	transcriptional regulator
BA_2997	3.7124	3.52397	7.15e-13	1.5e-11	12.1457	up_regulated	transcriptional regulator
BA_3423	1.09673	5.93432	0.0206392	0.0436003	1.68531	no_significant	transcriptional regulator
BA_3453	-0.992218	-1.3036	0.515922	0.617071	0.287416	no_significant	transcriptional regulator
BA_5244	-1.93292	-0.427074	0.0588998	0.105688	1.22989	no_significant	transcriptional regulator
BA_5200	-0.492441	6.77475	0.23914	0.330646	0.621347	no_significant	transcriptional activator
BA_0096	-0.298934	3.26879	0.520862	0.621206	0.283277	no_significant	transcription termination/antitermination protein NusG
BA_3953	-1.64731	5.19412	0.000333054	0.00121389	3.47748	down_regulated	transcription termination/antitermination protein NusA
BA_5575	-0.0358613	6.30158	0.941797	0.964734	0.0260427	no_significant	transcription termination factor Rho
BA_4664	-1.04223	3.34892	0.0295747	0.0591493	1.52908	no_significant	transcription repressor NadR
BA_3992	-1.72567	0.524253	0.00648826	0.0160841	2.18787	no_significant	transcription factor FapR
BA_3708	-1.84684	0.922082	0.00208527	0.00605708	2.68084	down_regulated	transcription factor
BA_4607	-0.635066	3.0999	0.174549	0.255091	0.758083	no_significant	transcription elongation factor GreA
BA_5432	-1.52855	0.976992	0.0193188	0.0409756	1.71402	no_significant	transcription antiterminator
BA_5437	-0.566929	3.76625	0.195644	0.279415	0.708534	no_significant	transcription antiterminator
BA_4254	-1.44855	2.1694	0.0025825	0.00726555	2.58796	down_regulated	transaminase
BA_0670	1.69693	9.35458	0.000958245	0.00307428	3.01852	up_regulated	transaldolase
BA_3430	-8.03991	3.06641	5.94e-21	3.33e-19	20.2261	down_regulated	transaldolase
BA_2236	-0.852511	2.07939	0.0687561	0.120045	1.16269	no_significant	thymidylate synthase
BA_3813	-3.0664	0.116189	0.00310998	0.00852547	2.50724	down_regulated	thymidylate synthase
BA_0027	-2.36543	-1.64576	0.126536	0.196897	0.897785	no_significant	thymidylate kinase
BA_5568	-2.03652	1.19282	0.0470381	0.0877739	1.32755	no_significant	threonylcarbamoyl-AMP synthase
BA_4535	-2.04377	4.05391	6.43e-05	0.000286045	4.19182	down_regulated	threonylcarbamoyladenosine tRNA methylthiotransferase
BA_2388	1.40109	3.3281	0.00399169	0.0105791	2.39884	no_significant	threonine--tRNA ligase
BA_4820	-0.423285	7.21363	0.31351	0.412844	0.503748	no_significant	threonine--tRNA ligase
BA_1969	-1.29986	5.4826	0.0145435	0.0320094	1.83733	no_significant	threonine synthase
BA_5387	1.49105	6.72131	0.00106985	0.00338584	2.97068	up_regulated	thioredoxin reductase
BA_2311	1.34694	-0.64872	0.245587	0.338335	0.609795	no_significant	thioredoxin family protein
BA_0757	0.890156	5.26208	0.0565268	0.102127	1.24775	no_significant	thioredoxin
BA_4758	1.91578	1.72455	0.00841782	0.020003	2.0748	no_significant	thioredoxin
BA_4945	1.52222	0.277254	0.0224168	0.046827	1.64943	no_significant	thioredoxin
BA_5225	-0.629108	1.90288	0.212616	0.299787	0.672403	no_significant	thioredoxin
BA_1494	-1.06031	-1.65223	0.604578	0.694011	0.218547	no_significant	thiol-disulfide oxidoreductase ResA
BA_3674	1.60028	2.9748	0.000506654	0.00175824	3.29529	up_regulated	thiol-disulfide oxidoreductase
BA_3355	0.161337	2.17967	0.725217	0.80397	0.139532	no_significant	thiol-activated cytolysin
BA_4890	1.28447	5.10199	0.0390499	0.0751344	1.40838	no_significant	thiol peroxidase
BA_0729	-2.48946	4.11775	0.00172486	0.00514156	2.76325	down_regulated	thiazole tautomerase
BA_0732	-1.06621	7.64089	0.0260827	0.0533178	1.58365	no_significant	thiazole synthase
BA_0377	0.968456	1.84031	0.04822	0.0895027	1.31677	no_significant	thiamine-phosphate synthase
BA_5066	3.35545	2.56703	3.53e-10	4.43e-09	9.45268	up_regulated	thiamine transporter
BA_3997	-0.376323	-1.72248	1	1	8.68e-16	no_significant	thiamine pyrophosphokinase
BA_5008	-1.04006	4.74209	0.019085	0.0405821	1.71931	no_significant	tetraprenyl-beta-curcumene synthase
BA_3042	-1.21318	3.71033	0.0349796	0.06805	1.45619	no_significant	tetracycline resistance protein
BA_0834	0.279256	-0.829039	0.824987	0.884483	0.0835529	no_significant	TetR family transcriptional regulator
BA_0955	1.26602	0.459997	0.0435551	0.0822969	1.36096	no_significant	TetR family transcriptional regulator
BA_1013	2.25028	-0.433037	0.052025	0.0953036	1.28379	no_significant	TetR family transcriptional regulator
BA_1052	2.32848	-1.74976	0.154188	0.231116	0.811951	no_significant	TetR family transcriptional regulator
BA_1725	1.34058	-0.55415	0.202805	0.288175	0.692922	no_significant	TetR family transcriptional regulator
BA_2169	0.518663	0.0330298	0.531522	0.63063	0.274478	no_significant	TetR family transcriptional regulator
BA_2406	-0.0445499	-0.763668	0.940009	0.963372	0.0268681	no_significant	TetR family transcriptional regulator
BA_2479	0.684533	3.39535	0.220187	0.308291	0.657208	no_significant	TetR family transcriptional regulator
BA_2530	3.53497	0.399487	2.74e-07	2e-06	6.56156	up_regulated	TetR family transcriptional regulator
BA_2543	1.00716	-0.356961	0.192789	0.276183	0.714917	no_significant	TetR family transcriptional regulator
BA_2754	-2.84609	-1.28519	0.0556876	0.100784	1.25424	no_significant	TetR family transcriptional regulator
BA_2951	-0.0532497	4.45219	0.925422	0.953484	0.0336602	no_significant	TetR family transcriptional regulator
BA_4434	-0.195399	0.798325	0.776139	0.847013	0.110061	no_significant	TetR family transcriptional regulator
BA_4814	-1.57804	0.796066	0.0294937	0.0590435	1.53027	no_significant	TetR family transcriptional regulator
BA_5585	0.537362	0.382781	0.507973	0.609398	0.294159	no_significant	TetR family transcriptional regulator
BA_5685	2.11035	2.44747	7.94e-06	4.34e-05	5.10038	up_regulated	TetR family transcriptional regulator
BA_0465	-0.926103	-1.85748	0.589525	0.68138	0.229498	no_significant	terminase large subunit
BA_3787	-1.12875	-1.4262	0.340052	0.439841	0.468455	no_significant	terminase large subunit
BA_4094	1.3301	-1.01996	0.166458	0.245312	0.778696	no_significant	terminase large subunit
BA_5356	-1.8863	-0.536527	0.0513729	0.0943969	1.28927	no_significant	terminase large subunit
BA_0404	2.14755	4.98033	0.000787111	0.00258683	3.10396	up_regulated	tellurite resistance protein
BA_5511	4.84041	-0.165619	3.46e-08	2.94e-07	7.46063	up_regulated	teichoic acid ABC transporter permease
BA_5510	2.45018	1.32146	0.000317359	0.00116679	3.49845	up_regulated	teichoic acid ABC transporter ATP-binding protein
BA_1939	-1.26733	-1.62662	0.344665	0.444817	0.462603	no_significant	tautomerase
BA_5626	2.30787	5.22501	4.05e-07	2.85e-06	6.39302	up_regulated	tautomerase
BA_0222	-2.64752	-1.39924	0.128855	0.199987	0.889899	no_significant	TatD family deoxyribonuclease
BA_0477	-1.0322	0.690614	0.158546	0.236135	0.799843	no_significant	tape measure protein
BA_4082	-0.0504935	-1.5918	1	1	0	no_significant	tape measure protein
BA_1489	-4.78178	5.01157	6.02e-19	2.69e-17	18.2202	down_regulated	superoxide dismutase
BA_4499	-0.280873	9.20038	0.504015	0.605231	0.297557	no_significant	superoxide dismutase
BA_5139	-2.16275	1.36491	0.000680917	0.00227297	3.16691	down_regulated	superoxide dismutase
BA_5696	0.664268	9.52721	0.107336	0.172838	0.969256	no_significant	superoxide dismutase
BA_1599	-2.16375	4.83671	1.01e-05	5.43e-05	4.99622	down_regulated	sulfurtransferase
BA_0733	-1.70328	7.6211	6.02e-05	0.000271222	4.2202	down_regulated	sulfur carrier protein ThiS adenylyltransferase
BA_0731	0.480198	3.23837	0.389532	0.495126	0.409457	no_significant	sulfur carrier protein ThiS
BA_1443	-1.39013	0.00936178	0.114999	0.182249	0.939304	no_significant	sulfite reductase
BA_0653	2.29661	-0.25379	0.00448142	0.0117001	2.34858	no_significant	sulfate transporter
BA_0878	1.99069	2.7614	9.78e-05	0.000414036	4.00961	up_regulated	sulfate transporter
BA_5031	0.45335	0.014839	0.5471	0.644747	0.261933	no_significant	sulfatase
BA_0200	1.7746	-0.705297	0.140005	0.213976	0.853856	no_significant	sugar transporter
BA_1612	-5.40685	-1.80045	0.0291725	0.0584841	1.53503	no_significant	sugar transferase
BA_5560	-7.65765	-0.170429	2.53e-06	1.52e-05	5.59714	down_regulated	sugar phosphate isomerase
BA_4232	1.30017	2.71549	0.00765492	0.0184508	2.11606	no_significant	sugar ABC transporter ATP-binding protein
BA_0753	-0.181018	2.18302	0.721533	0.80073	0.141744	no_significant	sucrose-6-phosphate hydrolase
BA_0755	-0.506404	0.270882	0.498946	0.601653	0.301946	no_significant	sucrose operon repressor
BA_3974	-0.818723	3.59999	0.10661	0.171868	0.9722	no_significant	succinyl-CoA ligase subunit beta
BA_3973	-1.24464	4.98974	0.00701542	0.0171751	2.15395	no_significant	succinyl-CoA ligase subunit alpha
BA_0327	1.43333	5.53354	0.00286783	0.00796703	2.54245	up_regulated	succinate-semialdehyde dehydrogenase
BA_4753	-1.32581	8.56201	0.00262596	0.0073632	2.58071	down_regulated	succinate dehydrogenase iron-sulfur subunit
BA_4754	-1.32483	9.01417	0.00685913	0.0168415	2.16373	no_significant	succinate dehydrogenase flavoprotein subunit
BA_4755	0.181445	6.70086	0.666599	0.751299	0.176135	no_significant	succinate dehydrogenase cytochrome b558 subunit
BA_0399	-0.347862	4.73726	0.449016	0.552733	0.347738	no_significant	stress response protein
BA_0400	0.762798	7.36268	0.0875126	0.146179	1.05793	no_significant	stress response protein
BA_0401	2.29809	5.75474	6.56e-07	4.43e-06	6.18324	up_regulated	stress response protein
BA_0870	-12.4828	4.20689	1.3e-30	2.72e-28	29.8875	down_regulated	stress response protein
BA_4692	-8.43809	3.44767	1.07e-22	7.76e-21	21.9706	down_regulated	stage VI sporulation protein D
BA_0053	-2.28714	1.74233	0.00963191	0.0224194	2.01629	no_significant	stage V sporulation protein T
BA_2154	2.73342	2.67231	2.05e-06	1.26e-05	5.68731	up_regulated	stage V sporulation protein S
BA_3912	2.44394	8.14164	2.21e-08	1.99e-07	7.65581	up_regulated	stage V sporulation protein S
BA_0767	-12.101	3.83454	8.32e-28	1.21e-25	27.0801	down_regulated	stage V sporulation protein R
BA_3839	-5.78886	2.80684	2.35e-13	5.14e-12	12.6297	down_regulated	stage V sporulation protein K
BA_4050	-1.91298	2.71235	0.00292443	0.00810288	2.53396	down_regulated	stage V sporulation protein E
BA_4054	-4.80129	4.34885	9.4e-19	4.07e-17	18.0271	down_regulated	stage V sporulation protein D
BA_0054	-1.47036	0.539699	0.0308046	0.0612018	1.51138	no_significant	stage V sporulation protein B
BA_0883	-0.554944	-0.103588	0.482818	0.585226	0.316216	no_significant	stage V sporulation protein B
BA_4643	-4.17381	1.31058	7.25e-08	5.85e-07	7.1398	down_regulated	stage V sporulation protein B
BA_4286	-1.05055	3.86971	0.0223558	0.0467339	1.65061	no_significant	stage V sporulation protein AF
BA_5377	-6.49168	1.63186	8.97e-13	1.81e-11	12.047	down_regulated	stage V sporulation protein AEB
BA_4288	-3.91458	0.778771	1.73e-05	8.76e-05	4.7628	down_regulated	stage V sporulation protein AD
BA_5376	-12.2864	4.01504	7.26e-29	1.27e-26	28.139	down_regulated	stage V sporulation protein AD
BA_5375	-10.3554	2.17211	2.79e-18	1.14e-16	17.554	down_regulated	stage V sporulation protein AC
BA_4291	-1.57556	-0.184315	0.175927	0.256926	0.754668	no_significant	stage V sporulation protein AA
BA_4678	-3.38456	2.07832	2.59e-09	2.71e-08	8.5863	down_regulated	stage IV sporulation protein FB
BA_4679	-3.64372	0.0605551	0.000393857	0.00140864	3.40466	down_regulated	stage IV sporulation protein FA
BA_1530	-7.87577	8.23991	3.37e-24	3.37e-22	23.4729	down_regulated	stage IV sporulation protein A
BA_5521	-10.4659	2.27467	8.68e-19	3.8e-17	18.0614	down_regulated	stage III sporulation protein D
BA_4410	-2.89598	0.916953	0.00024939	0.000947548	3.60312	down_regulated	stage III sporulation protein AH
BA_4411	-6.92648	3.72304	5.16e-21	2.98e-19	20.287	down_regulated	stage III sporulation protein AG
BA_4412	-9.73824	1.60728	3.01e-14	7.5e-13	13.5208	down_regulated	stage III sporulation protein AF
BA_4413	-9.24918	1.1713	1.45e-11	2.29e-10	10.8383	down_regulated	stage III sporulation protein AE
BA_4414	-7.54004	-0.266862	3.48e-06	2.04e-05	5.45892	down_regulated	stage III sporulation protein AD
BA_4415	-8.01763	0.121267	3.87e-07	2.74e-06	6.41193	down_regulated	stage III sporulation protein AC
BA_4416	-8.64715	0.648468	2.34e-09	2.48e-08	8.62998	down_regulated	stage III sporulation protein AB
BA_4417	-8.01872	3.88152	1.43e-26	1.77e-24	25.8448	down_regulated	stage III sporulation protein AA
BA_2490	-0.580483	2.65092	0.225764	0.315051	0.646345	no_significant	stage II sporulation protein SA
BA_5570	-2.89628	3.78389	2.38e-08	2.12e-07	7.62362	down_regulated	stage II sporulation protein R
BA_2068	-3.23164	1.37891	2.16e-06	1.32e-05	5.66645	down_regulated	stage II sporulation protein P
BA_3102	-6.69384	1.79864	2.03e-14	5.24e-13	13.6922	down_regulated	stage II sporulation protein P
BA_4314	-2.53928	2.62171	2.03e-07	1.5e-06	6.69252	down_regulated	stage II sporulation protein M
BA_0061	-2.57147	5.69096	1.79e-08	1.64e-07	7.74761	down_regulated	stage II sporulation protein E
BA_5524	-5.08504	3.71725	7.36e-10	8.53e-09	9.13296	down_regulated	stage II sporulation protein D
BA_5524	-5.88934	7.58296	5.14e-25	5.4e-23	24.2892	down_regulated	stage II sporulation protein
BA_1350	1.43794	2.7992	0.0124092	0.0279665	1.90626	no_significant	stage 0 sporulation regulatory protein
BA_0029	-1.21059	3.59435	0.0501982	0.0924807	1.29931	no_significant	stage 0 sporulation protein YaaT
BA_5729	0.935726	5.39031	0.0320729	0.0632437	1.49386	no_significant	stage 0 sporulation protein J
BA_4394	1.73687	5.25609	0.000495899	0.00172519	3.30461	up_regulated	stage 0 sporulation protein A
BA_5332	-0.923643	1.37181	0.104224	0.168992	0.982034	no_significant	SsrA-binding protein
BA_5047	1.97654	3.57953	2.57e-05	0.000125319	4.58934	up_regulated	S-ribosylhomocysteine lyase
BA_3612	-3.43155	3.12421	2.86e-10	3.67e-09	9.54333	down_regulated	sporulenol synthase
BA_1527	-6.01858	-1.39749	0.00477444	0.0123198	2.32108	no_significant	sporulation-specific transcription factor SpoVIF
BA_0040	-5.43255	-1.78164	0.0295589	0.059146	1.52931	no_significant	sporulation-specific protease YabG
BA_2308	0.762013	6.68477	0.112804	0.179853	0.947677	no_significant	sporulation-control protein Spo0M
BA_5382	-0.88693	5.29997	0.0453237	0.0851033	1.34367	no_significant	sporulation transcription regulator WhiA
BA_4044	-1.16991	1.82992	0.0168158	0.0363264	1.77428	no_significant	sporulation sigma-E factor-processing peptidase
BA_2747	-5.86898	4.18189	1.05e-22	7.76e-21	21.9799	down_regulated	sporulation protein YpeB
BA_0251	-6.72613	6.69704	1.17e-21	7.71e-20	20.9308	down_regulated	sporulation protein YdcC
BA_0057	-1.46231	0.374546	0.0401584	0.0769154	1.39622	no_significant	sporulation protein YabP
BA_4530	-1.23605	-0.301747	0.19088	0.273914	0.719238	no_significant	sporulation protein
BA_5207	-9.59603	1.47909	1.4e-14	3.7e-13	13.8545	down_regulated	sporulation protein
BA_4850	-8.77429	0.756523	2.42e-10	3.15e-09	9.61626	down_regulated	sporulation membrane protein
BA_4658	-5.06794	4.59305	2.41e-13	5.19e-12	12.6185	down_regulated	sporulation lipoprotein
BA_1351	0.668845	2.63291	0.192009	0.275189	0.716679	no_significant	sporulation kinase D
BA_1356	-0.356661	2.95573	0.457579	0.560804	0.339534	no_significant	sporulation kinase B
BA_2644	2.00456	-0.916319	0.0216411	0.0453934	1.66472	no_significant	sporulation kinase B
BA_4223	2.29056	4.17389	2.24e-06	1.36e-05	5.64885	up_regulated	sporulation kinase B
BA_4138	-0.429869	3.18051	0.379999	0.485208	0.420218	no_significant	sporulation integral membrane protein
BA_5581	-0.539914	1.69319	0.307868	0.406612	0.511635	no_significant	sporulation initiation phosphotransferase F
BA_5730	-1.01333	4.4161	0.0426872	0.0808386	1.3697	no_significant	sporulation initiation inhibitor protein Soj
BA_2450	-4.09488	4.4933	6.53e-10	7.67e-09	9.1853	down_regulated	spore surface glycoprotein BclB
BA_1222	-5.81539	9.85251	1.12e-30	2.47e-28	29.9523	down_regulated	spore surface glycoprotein BclA
BA_1411	-8.77374	0.755839	3.23e-10	4.08e-09	9.49051	down_regulated	spore protein
BA_4891	-5.1083	3.98904	1.28e-18	5.46e-17	17.8912	down_regulated	spore protein
BA_4429	-0.767664	0.958908	0.297153	0.395139	0.52702	no_significant	spore photoproduct lyase
BA_1492	-2.92755	1.01193	0.000107891	0.000450636	3.96701	down_regulated	spore maturation protein B
BA_1491	-8.05485	0.150775	3.62e-07	2.58e-06	6.44092	down_regulated	spore maturation protein A
BA_0762	-9.15676	1.08962	2.72e-11	4.06e-10	10.5655	down_regulated	spore germination protein GerYC
BA_0763	-7.5214	2.56155	1.61e-18	6.78e-17	17.7924	down_regulated	spore germination protein GerYA
BA_1144	-2.37151	2.67304	0.000355074	0.00128524	3.44968	down_regulated	spore germination protein GerPF
BA_2341	-4.50862	-2.30157	0.0955861	0.157168	1.01961	no_significant	spore germination protein GerPF
BA_5052	-4.83721	0.222395	7.18e-06	3.96e-05	5.1436	down_regulated	spore germination protein GerPF
BA_1145	-4.22125	2.37306	7.05e-12	1.19e-10	11.1517	down_regulated	spore germination protein GerPE
BA_1146	-4.26398	-0.256593	0.000166485	0.0006575	3.77862	down_regulated	spore germination protein GerPD
BA_1147	-3.32292	3.72794	1.33e-09	1.46e-08	8.87537	down_regulated	spore germination protein GerPC
BA_1148	-0.389701	0.985255	0.499216	0.601807	0.301711	no_significant	spore germination protein GerPB
BA_1149	0.0769451	-1.66642	1	1	0	no_significant	spore germination protein GerPA
BA_0711	-7.69989	-0.136337	3.81e-06	2.23e-05	5.41856	down_regulated	spore germination protein GerLC
BA_0710	-6.87383	-0.780005	0.00024974	0.000948019	3.60251	down_regulated	spore germination protein GerLB
BA_0709	-2.55389	0.0196833	0.00455333	0.0118805	2.34167	no_significant	spore germination protein GerLA
BA_0633	-3.52755	0.404084	0.00016377	0.000649058	3.78577	down_regulated	spore germination protein GerKC
BA_0634	-2.82594	-0.101227	0.00612619	0.0153191	2.21281	no_significant	spore germination protein GerKB
BA_0635	-3.47475	2.55969	1.27e-08	1.19e-07	7.89719	down_regulated	spore germination protein GerKA
BA_4986	-1.36842	1.62497	0.00675912	0.0166445	2.17011	no_significant	spore germination protein GerHC
BA_4985	-1.1632	1.472	0.0664332	0.117009	1.17762	no_significant	spore germination protein GerHB
BA_4984	-1.74918	2.46493	0.00250606	0.00706572	2.60101	down_regulated	spore germination protein GerHA
BA_4724	-6.05413	-1.37678	0.00557131	0.0141503	2.25404	no_significant	spore germination protein GerE
BA_0148	0.76753	2.46479	0.116278	0.183721	0.934502	no_significant	spore germination protein GerD
BA_3150	-2.52307	0.193353	0.00222864	0.00642032	2.65196	down_regulated	spore germination protein GerAA
BA_3633	-3.42014	0.939672	1.31e-06	8.34e-06	5.88374	down_regulated	spore germination protein
BA_3634	-4.90927	0.27788	3.39e-06	2e-05	5.46941	down_regulated	spore germination protein
BA_3635	-1.69263	-0.00962568	0.0219964	0.0460511	1.65765	no_significant	spore germination protein
BA_3668	-5.9057	3.59714	3.85e-21	2.25e-19	20.4145	down_regulated	spore germination protein
BA_2748	-6.648	1.75705	2.79e-14	6.99e-13	13.5538	down_regulated	spore cortex-lytic protein
BA_0058	-1.65603	1.87158	0.00192027	0.00566783	2.71664	down_regulated	spore cortex biosynthesis protein YabQ
BA_1288	0.750138	3.9115	0.0842932	0.141758	1.07421	no_significant	spore coat-associated protein
BA_1290	0.969286	4.81645	0.0682593	0.119376	1.16584	no_significant	spore coat-associated protein
BA_4691	-8.70926	5.62804	8.33e-27	1.09e-24	26.0795	down_regulated	spore coat protein YsxE
BA_1238	-9.42339	7.21444	4.18e-43	9.13e-40	42.3784	down_regulated	spore coat protein Y
BA_2046	0.349859	-1.69727	0.816642	0.878748	0.0879683	no_significant	spore coat protein H
BA_5641	-5.01022	6.14981	2.29e-21	1.38e-19	20.6398	down_regulated	spore coat protein GerQ
BA_3121	-0.692584	-0.102125	0.500165	0.602291	0.300886	no_significant	spore coat protein F
BA_5241	-10.2101	5.17812	3.12e-33	1.31e-30	32.5055	down_regulated	spore coat protein F
BA_3906	-7.58274	7.29793	2.06e-25	2.34e-23	24.686	down_regulated	spore coat protein E
BA_1581	-4.89317	2.48921	1.76e-12	3.36e-11	11.7556	down_regulated	spore coat protein D
BA_1233	-3.4257	0.548736	5.33e-05	0.000242193	4.27357	down_regulated	spore coat protein CotO
BA_2536	0.689614	-1.40835	0.664395	0.749901	0.177574	no_significant	spore coat protein
BA_5188	-0.698889	4.94489	0.106445	0.171724	0.972875	no_significant	spore coat protein
BA_1231	-4.80973	4.91674	7.71e-21	4.27e-19	20.1131	down_regulated	spore coat polysaccharide biosynthesis protein SpsK
BA_0803	-9.59403	5.5012	1.17e-33	6.14e-31	32.9323	down_regulated	spore coat composition protein CotJC
BA_0804	-8.94039	0.900274	1.69e-11	2.62e-10	10.7719	down_regulated	spore coat composition protein CotJB
BA_0805	-9.44477	1.34389	1.74e-13	3.91e-12	12.7596	down_regulated	spore coat composition protein CotJA
BA_4659	-7.06442	6.55933	4.81e-16	1.52e-14	15.3179	down_regulated	spore coat assembly protein SafA
BA_4396	-3.69231	3.89661	4.63e-12	8.18e-11	11.3348	down_regulated	SpoIVB peptidase
BA_1300	-1.29802	3.05482	0.00756814	0.0182835	2.12101	no_significant	spermidine/putrescine ABC transporter substrate-binding protein
BA_1298	-1.47519	0.803614	0.0136606	0.0303183	1.86453	no_significant	spermidine/putrescine ABC transporter permease
BA_1299	-0.772827	1.23394	0.177036	0.258008	0.751939	no_significant	spermidine/putrescine ABC transporter permease
BA_1297	-1.59926	1.20305	0.0144546	0.0318674	1.83999	no_significant	spermidine/putrescine ABC transporter ATP-binding protein
BA_1448	4.02128	2.19951	1.65e-08	1.53e-07	7.7818	up_regulated	sodium-dependent transporter
BA_1835	-0.4226	0.0468368	0.626117	0.714834	0.203345	no_significant	sodium-dependent transporter
BA_2216	2.35601	0.190706	0.00895	0.0211007	2.04818	no_significant	sodium-dependent transporter
BA_3574	3.14478	4.51864	4.72e-10	5.72e-09	9.32627	up_regulated	sodium-dependent transporter
BA_4293	3.40186	6.74652	7.41e-14	1.76e-12	13.1301	up_regulated	sodium-dependent transporter
BA_0708	3.80987	5.65449	7.02e-14	1.68e-12	13.1537	up_regulated	sodium/solute symporter
BA_0638	1.39849	2.88702	0.0282594	0.0569248	1.54884	no_significant	sodium/proton-dependent alanine carrier protein
BA_2830	-0.870124	6.54033	0.0528473	0.0965577	1.27698	no_significant	sodium/proton-dependent alanine carrier protein
BA_1246	0.450632	1.23869	0.502072	0.60352	0.299234	no_significant	sodium/proline symporter
BA_3607	-0.346578	-0.147829	0.769429	0.842108	0.113831	no_significant	sodium/pantothenate symporter
BA_5289	-1.63024	0.484111	0.0605381	0.10812	1.21797	no_significant	sodium/glutamine symporter GlnT
BA_5300	2.76365	2.7177	1.35e-08	1.26e-07	7.86963	up_regulated	sodium/glutamine symporter GlnT
BA_5301	-0.70804	0.551971	0.271473	0.367088	0.566273	no_significant	sodium/glutamine symporter GlnT
BA_3972	-0.590121	-0.686623	0.658717	0.744637	0.181301	no_significant	smF; pseudogene
BA_3669	-3.51031	-0.0837167	0.000404786	0.00144282	3.39277	down_regulated	small acid-soluble spore protein Tlp
BA_3678	-8.81493	0.792357	4.68e-10	5.69e-09	9.3296	down_regulated	small acid-soluble spore protein O
BA_4806	-6.37068	-1.15193	0.0014326	0.00436949	2.84387	down_regulated	small acid-soluble spore protein I
BA_4898	-8.83638	8.4971	4.34e-43	9.13e-40	42.3623	down_regulated	small acid-soluble spore protein B
BA_0042	-2.90555	-1.31386	0.0549377	0.0997703	1.26013	no_significant	small acid-soluble spore protein
BA_0524	-4.86173	7.73527	1.89e-21	1.19e-19	20.7233	down_regulated	small acid-soluble spore protein
BA_0858	-5.22078	5.89057	1.1e-20	5.87e-19	19.9576	down_regulated	small acid-soluble spore protein
BA_1324	-2.30771	1.17483	0.000230039	0.000879585	3.6382	down_regulated	small acid-soluble spore protein
BA_1729	-0.980662	3.77404	0.111172	0.177791	0.954003	no_significant	small acid-soluble spore protein
BA_1987	-3.89863	6.56421	2.03e-12	3.81e-11	11.6929	down_regulated	small acid-soluble spore protein
BA_3127	-6.74069	-0.889293	0.000588628	0.00200603	3.23016	down_regulated	small acid-soluble spore protein
BA_3130	-7.10284	-0.608735	7.45e-05	0.000324061	4.12782	down_regulated	small acid-soluble spore protein
BA_0885	0.59019	4.07598	0.281554	0.377964	0.550438	no_significant	S-layer protein Sap
BA_0887	0.427931	9.98533	0.378286	0.483755	0.42218	no_significant	S-layer protein EA1
BA_0981	0.741893	-1.35969	0.544355	0.642232	0.264118	no_significant	S-layer protein
BA_1093	-1.32063	-1.0174	0.213648	0.30114	0.670302	no_significant	S-layer protein
BA_1127	0.476252	3.96134	0.280124	0.376422	0.55265	no_significant	S-layer protein
BA_1129	-0.0897275	5.32963	0.869142	0.916653	0.0609093	no_significant	S-layer protein
BA_1130	0.836966	3.57612	0.0836938	0.140863	1.07731	no_significant	S-layer protein
BA_1817	0.691945	2.72478	0.138965	0.212773	0.857093	no_significant	S-layer protein
BA_1818	1.95278	5.06734	0.000563801	0.00193579	3.24887	up_regulated	S-layer protein
BA_2803	-5.53278	-1.71816	0.0251413	0.0516078	1.59961	no_significant	S-layer protein
BA_3338	0.245598	8.61751	0.56739	0.663085	0.246118	no_significant	S-layer protein
BA_5054	-2.10962	1.88628	0.00125033	0.00386115	2.90298	down_regulated	S-layer protein
BA_0427	1.95888	5.84165	0.000288313	0.00106935	3.54014	up_regulated	site-specific recombinase
BA_3840	1.49594	5.1383	0.000881825	0.00286185	3.05462	up_regulated	site-specific recombinase
BA_4134	0.691639	3.14589	0.120771	0.189572	0.918037	no_significant	site-specific recombinase
BA_5363	-0.715313	1.13496	0.356491	0.458812	0.447952	no_significant	site-specific recombinase
BA_2143	-3.38972	1.35382	6.41e-07	4.34e-06	6.19286	down_regulated	sirohydrochlorin ferrochelatase
BA_4639	-0.929361	2.93016	0.0456624	0.0856143	1.34044	no_significant	single-stranded-DNA-specific exonuclease RecJ
BA_2168	-5.41929	-1.7872	0.0434474	0.0821302	1.36204	no_significant	single-stranded DNA-binding protein
BA_5722	-1.66079	8.06893	0.0062387	0.0155358	2.20491	no_significant	single-stranded DNA-binding protein
BA_0548	2.08658	1.05475	0.00102495	0.003256	2.9893	up_regulated	signaling protein
BA_2533	-4.7454	2.0061	5.5e-12	9.48e-11	11.2597	down_regulated	signaling protein
BA_3879	-1.46767	-0.873719	0.110567	0.176957	0.956376	no_significant	signaling protein
BA_5543	-0.658434	2.15716	0.156946	0.234332	0.804251	no_significant	signaling protein
BA_5593	-6.00726	-1.41179	0.00927635	0.0217549	2.03262	no_significant	signaling protein
BA_3985	-0.929274	2.23839	0.102821	0.166911	0.987917	no_significant	signal recognition particle receptor FtsY
BA_3983	-0.26839	6.18012	0.534149	0.632675	0.272338	no_significant	signal recognition particle protein
BA_1140	1.06654	0.470751	0.0801912	0.136221	1.09587	no_significant	signal peptidase I
BA_1287	1.13695	6.42519	0.0123352	0.0278186	1.90885	no_significant	signal peptidase I
BA_3086	3.06882	0.643098	1.87e-06	1.16e-05	5.72763	up_regulated	signal peptidase I
BA_3099	2.57182	3.34418	1.52e-05	7.83e-05	4.81925	up_regulated	signal peptidase I
BA_3977	-1.7387	1.89262	0.0126978	0.0285293	1.89627	no_significant	signal peptidase I
BA_3958	-1.09609	3.22409	0.0204085	0.0431782	1.69019	no_significant	sigma-W protease regulator RasP
BA_0024	-4.64333	1.32903	1.52e-08	1.41e-07	7.81815	down_regulated	sigma-k factor processing regulatory protein BofA
BA_5422	2.78652	12.6104	1.06e-07	8.21e-07	6.97311	up_regulated	sigma-54 modulation protein
BA_4389	1.87127	0.836549	0.000653379	0.00219673	3.18483	up_regulated	sigma L-dependent transcriptional regulator
BA_0994	0.853037	4.04592	0.0722317	0.125023	1.14127	no_significant	sigma factor SigB regulation protein RsbU
BA_1112	-1.42879	2.31341	0.0814286	0.137656	1.08922	no_significant	sigma factor regulator
BA_0615	-2.98945	1.08681	6.79e-06	3.75e-05	5.16841	down_regulated	siderophore ABC transporter substrate-binding protein
BA_0616	-0.507485	0.415181	0.447977	0.55174	0.348744	no_significant	siderophore ABC transporter permease
BA_0617	-0.0390113	1.36516	0.978503	0.995545	0.00943805	no_significant	siderophore ABC transporter permease
BA_0618	-0.153473	3.65182	0.779639	0.848864	0.108106	no_significant	siderophore ABC transporter ATP-binding protein
BA_3356	1.57717	3.48768	0.00165757	0.00497626	2.78053	up_regulated	short-chain fatty acids transporter
BA_2835	-1.7339	5.28316	0.00148128	0.00450165	2.82936	down_regulated	short chain dehydrogenase
BA_4561	-2.69426	1.72569	2.51e-05	0.000122553	4.60004	down_regulated	shikimate dehydrogenase
BA_0012	-0.622518	5.71063	0.145747	0.220952	0.836401	no_significant	serine--tRNA ligase
BA_0991	-0.279182	7.35962	0.501929	0.60352	0.299358	no_significant	serine-protein kinase RsbW
BA_4000	-2.29028	4.8014	4.81e-06	2.74e-05	5.31797	down_regulated	serine/threonine-protein kinase PrkC
BA_2307	-0.805349	2.08464	0.0944181	0.155857	1.02494	no_significant	serine/threonine-protein kinase
BA_3306	0.128293	2.4047	0.774203	0.846231	0.111145	no_significant	serine/threonine transporter
BA_3451	1.44918	-0.132511	0.0495414	0.091632	1.30503	no_significant	serine/threonine transporter
BA_0570	-0.278862	-0.464498	0.819899	0.880352	0.0862395	no_significant	serine/threonine phosphatase
BA_5261	-3.33042	0.640308	6.48e-05	0.000287726	4.18854	down_regulated	serine/threonine exchanger SteT
BA_2380	-3.72289	6.70312	4.29e-14	1.05e-12	13.3672	down_regulated	serine protease
BA_3660	-0.718466	4.64219	0.0996877	0.162767	1.00136	no_significant	serine protease
BA_5710	-3.60971	4.14584	8.81e-11	1.22e-09	10.0551	down_regulated	serine protease
BA_0550	-7.62833	8.99646	1.99e-21	1.22e-19	20.7003	down_regulated	serine kinase
BA_5558	-2.43138	8.81991	3.07e-07	2.21e-06	6.51324	down_regulated	serine hydroxymethyltransferase
BA_0088	-0.946357	3.75885	0.119749	0.188286	0.921727	no_significant	serine acetyltransferase
BA_4680	-1.83234	7.14675	4.51e-05	0.000208353	4.34603	down_regulated	septum site-determining protein MinD
BA_4681	0.392134	5.69775	0.37856	0.483959	0.421865	no_significant	septum site-determining protein MinC
BA_4035	0.142527	3.63894	0.779394	0.848864	0.108243	no_significant	septum site-determining protein DivIVA
BA_4686	-1.51037	0.767544	0.0188949	0.0402389	1.72366	no_significant	septum formation protein Maf
BA_4901	3.01393	6.11371	9.66e-08	7.58e-07	7.01486	up_regulated	septation ring formation regulator
BA_0047	2.57957	8.65332	2.03e-09	2.17e-08	8.69351	up_regulated	septation protein SpoVG
BA_5667	3.07296	2.22787	2.5e-09	2.63e-08	8.60147	up_regulated	sensory transduction protein LytT
BA_5691	0.477428	-0.597519	0.758097	0.832341	0.120275	no_significant	sensory transduction protein LytT
BA_1498	-1.93891	3.73067	0.000128018	0.000525313	3.89273	down_regulated	sensor histidine kinase ResE
BA_5692	-0.603901	0.172754	0.43789	0.541468	0.358635	no_significant	sensor histidine kinase LytS
BA_0742	-0.785232	-1.84139	0.778393	0.848386	0.108801	no_significant	sensor histidine kinase KdpD
BA_0272	-1.59013	-0.68125	0.150046	0.226095	0.823776	no_significant	sensor histidine kinase
BA_0286	-3.46104	-0.811168	0.0189368	0.0402873	1.72269	no_significant	sensor histidine kinase
BA_0559	-0.842493	-1.41386	0.661186	0.746764	0.179676	no_significant	sensor histidine kinase
BA_0572	0.344944	-1.72868	0.808049	0.872568	0.0925623	no_significant	sensor histidine kinase
BA_0584	1.17881	0.452847	0.104515	0.169334	0.980821	no_significant	sensor histidine kinase
BA_0650	1.50679	0.568182	0.0225409	0.0470506	1.64703	no_significant	sensor histidine kinase
BA_0996	-0.113362	5.13487	0.8139	0.877155	0.089429	no_significant	sensor histidine kinase
BA_1118	-2.86866	-0.56942	0.0102703	0.0236826	1.98842	no_significant	sensor histidine kinase
BA_1313	-1.2398	0.848508	0.149312	0.225253	0.825907	no_significant	sensor histidine kinase
BA_1456	-4.52219	-0.0285224	7.26e-05	0.000318043	4.13907	down_regulated	sensor histidine kinase
BA_1482	1.01665	1.60295	0.0387766	0.0747453	1.41143	no_significant	sensor histidine kinase
BA_1956	0.384156	-1.66382	0.775555	0.846939	0.110387	no_significant	sensor histidine kinase
BA_2213	0.116961	-0.989616	1	1	0	no_significant	sensor histidine kinase
BA_2264	0.216501	-1.72574	0.892697	0.932145	0.0492962	no_significant	sensor histidine kinase
BA_2291	4.89715	5.88863	6.1e-16	1.87e-14	15.2144	up_regulated	sensor histidine kinase
BA_2560	1.39295	0.794326	0.0181689	0.0388897	1.74067	no_significant	sensor histidine kinase
BA_2636	0.146495	0.311351	0.851613	0.903376	0.0697576	no_significant	sensor histidine kinase
BA_3066	-0.0415301	-1.25589	1	1	0	no_significant	sensor histidine kinase
BA_3230	-1.01681	0.487654	0.0956949	0.157245	1.01911	no_significant	sensor histidine kinase
BA_3260	-1.17549	0.183296	0.179051	0.260314	0.747023	no_significant	sensor histidine kinase
BA_4776	0.303797	1.57793	0.604944	0.694241	0.218285	no_significant	sensor histidine kinase
BA_4921	-2.07861	0.40215	0.00276346	0.00770254	2.55855	down_regulated	sensor histidine kinase
BA_5028	-5.43149	-1.78815	0.0348765	0.0679016	1.45747	no_significant	sensor histidine kinase
BA_5067	0.381381	-0.593258	0.695628	0.77671	0.157623	no_significant	sensor histidine kinase
BA_5088	-0.569725	1.63623	0.246672	0.339386	0.60788	no_significant	sensor histidine kinase
BA_5105	-0.790817	-0.93875	0.558489	0.655606	0.252985	no_significant	sensor histidine kinase
BA_5276	1.54155	1.74861	0.00203906	0.00596573	2.69057	up_regulated	sensor histidine kinase
BA_5503	-0.671329	1.00186	0.412192	0.516437	0.384901	no_significant	sensor histidine kinase
BA_5598	0.320248	-0.327125	0.683092	0.766361	0.165521	no_significant	sensor histidine kinase
BA_5714	-0.390319	3.83864	0.381821	0.487091	0.41814	no_significant	sensor histidine kinase
BA_4276	-5.47007	-1.7565	0.0317346	0.0626941	1.49847	no_significant	segregation and condensation protein B
BA_4278	-1.58085	0.606496	0.0153203	0.0334738	1.81473	no_significant	segregation and condensation protein A
BA_2243	2.5611	2.86373	6.11e-06	3.4e-05	5.21382	up_regulated	Sec-independent protein translocase protein TatC
BA_3655	0.0358263	0.122022	1	1	0	no_significant	scyllo-inositol 2-dehydrogenase
BA_4648	-2.32877	3.41328	6.66e-05	0.000294346	4.17683	down_regulated	S-adenosylmethionine:tRNA ribosyltransferase-isomerase
BA_5017	0.302098	6.71589	0.486857	0.589441	0.312599	no_significant	S-adenosylmethionine synthase
BA_4825	-1.26143	5.48134	0.00569386	0.0144073	2.24459	no_significant	S-adenosylmethionine decarboxylase
BA_3252	-0.318644	2.60757	0.613284	0.702101	0.212339	no_significant	S-adenosyl-L-methionine-dependent methyltransferase
BA_2564	-0.117617	-1.54167	1	1	0	no_significant	S-adenosylhomocysteine nucleosidase
BA_5864	3.17123	16.0458	6.74e-12	1.15e-10	11.1711	up_regulated	rrsK; rRNA
BA_5811	1.06938	2.62599	0.0301529	0.0601058	1.52067	no_significant	rrsJ; rRNA
BA_5792	4.16645	10.4893	5.75e-16	1.78e-14	15.2405	up_regulated	rrsI; rRNA
BA_5755	2.82016	14.3302	6.36e-10	7.51e-09	9.19647	up_regulated	rrsD; rRNA
BA_5752	2.15946	7.22329	0.000121769	0.000501627	3.91446	up_regulated	rrsC; rRNA
BA_5745	2.78882	12.9456	8.09e-10	9.22e-09	9.09202	up_regulated	rrsB; rRNA
BA_5739	3.10717	15.8551	1.63e-11	2.54e-10	10.7883	up_regulated	rrsA; rRNA
BA_0033	-1.33704	0.656616	0.0473623	0.0882222	1.32457	no_significant	rRNA small subunit methyltransferase I
BA_4057	-0.949646	4.92956	0.126051	0.196286	0.899455	no_significant	rRNA small subunit methyltransferase H
BA_5732	-0.867898	3.3152	0.0537652	0.0979794	1.2695	no_significant	rRNA small subunit methyltransferase G
BA_4536	-3.90151	0.261352	4.96e-05	0.000226589	4.30484	down_regulated	rRNA small subunit methyltransferase E
BA_4003	-2.4123	3.29958	1.17e-06	7.58e-06	5.9317	down_regulated	rRNA small subunit methyltransferase B
BA_0039	0.241988	2.43532	0.63798	0.725816	0.195193	no_significant	rRNA small subunit methyltransferase A
BA_4399	0.279696	4.68432	0.545783	0.643555	0.26298	no_significant	rRNA methyltransferase
BA_5002	-6.86247	-0.787888	0.000811061	0.00265679	3.09095	down_regulated	rRNA methylase
BA_4780	2.44822	0.406927	0.000261024	0.000980239	3.58332	up_regulated	rRNA large subunit methyltransferase YwbD
BA_5708	-1.32306	1.15138	0.0169718	0.036588	1.77027	no_significant	rRNA large subunit methyltransferase H
BA_5863	1.31827	12.7594	0.0546316	0.099343	1.26256	no_significant	rrlK; rRNA
BA_5812	1.34216	4.81895	0.0454436	0.0852903	1.34253	no_significant	rrlJ; rRNA
BA_5793	0.975004	8.95394	0.172805	0.252983	0.762443	no_significant	rrlI; rRNA
BA_5787	1.98512	7.1174	0.00780814	0.0187663	2.10745	no_significant	rrlG; rRNA
BA_5784	3.01137	4.65747	5.94e-05	0.000267846	4.22657	up_regulated	rrlF; rRNA
BA_5756	1.22349	4.83437	0.0637011	0.112906	1.19585	no_significant	rrlD; rRNA
BA_5753	1.62757	8.70242	0.0128509	0.0288426	1.89107	no_significant	rrlC; rRNA
BA_5742	1.32473	12.8672	0.0535385	0.097651	1.27133	no_significant	rrlA; rRNA
BA_5862	1.59244	7.9959	0.000156644	0.000622726	3.80509	up_regulated	rrfK; rRNA
BA_5813	1.64896	5.56315	0.000253709	0.000959891	3.59566	up_regulated	rrfJ; rRNA
BA_5757	1.11793	6.02282	0.00952992	0.0222189	2.02091	no_significant	rrfD; rRNA
BA_5743	1.42529	9.76218	0.00074985	0.00247751	3.12503	up_regulated	rrfA; rRNA
BA_0821	2.52066	-0.38915	0.000478056	0.00167002	3.32052	up_regulated	RpiR family transcriptional regulator
BA_0398	-0.450149	-0.585577	0.707653	0.788656	0.15018	no_significant	ROK family protein
BA_4381	2.12062	4.37677	2.36e-06	1.43e-05	5.62663	up_regulated	rod shape-determining protein RodA
BA_4682	1.51592	1.47787	0.005009	0.0128384	2.30025	no_significant	rod shape-determining protein MreD
BA_4683	-0.0670364	3.48602	0.911351	0.944589	0.0403143	no_significant	rod shape-determining protein MreC
BA_4684	0.289102	2.89338	0.516782	0.617321	0.286692	no_significant	rod shape-determining protein MreB
BA_3842	4.10557	3.64275	1.59e-14	4.15e-13	13.7991	up_regulated	RNA-binding protein Hfq
BA_3981	1.32054	3.27362	0.0112189	0.0255892	1.95005	no_significant	RNA-binding protein
BA_4036	-2.29999	4.13879	5.54e-05	0.000250762	4.25659	down_regulated	RNA-binding protein
BA_4560	1.29117	2.47091	0.0250667	0.0514798	1.6009	no_significant	RNA-binding protein
BA_5735	0.242209	5.34641	0.603298	0.69292	0.219468	no_significant	RNA-binding protein
BA_1214	-1.77548	4.16878	0.00961009	0.022381	2.01727	no_significant	RNA pseudouridine synthase
BA_1304	-1.06774	-0.616472	0.237655	0.329242	0.624052	no_significant	RNA pseudouridine synthase
BA_4031	-1.16839	2.59139	0.0214908	0.0451501	1.66775	no_significant	RNA pseudouridine synthase
BA_4958	0.0727575	-1.17532	1	1	0	no_significant	RNA pseudouridine synthase
BA_0093	2.2757	5.59607	1.94e-06	1.19e-05	5.71305	up_regulated	RNA polymerase sigma-H factor
BA_4042	-7.40786	4.30095	9.26e-24	8.66e-22	23.0334	down_regulated	RNA polymerase sigma-G factor
BA_4294	-3.24099	5.56789	1.41e-09	1.54e-08	8.85141	down_regulated	RNA polymerase sigma-F factor
BA_0992	-0.851791	6.99368	0.130855	0.202493	0.883209	no_significant	RNA polymerase sigma-B factor
BA_2454	-1.68929	2.19653	0.00327665	0.0089259	2.48457	down_regulated	RNA polymerase sigma-70 factor
BA_2789	1.09131	2.04016	0.0232787	0.0481367	1.63304	no_significant	RNA polymerase sigma-70 factor
BA_4913	-5.26956	-1.88179	0.041279	0.0787748	1.38427	no_significant	RNA polymerase sigma-70 factor
BA_5372	-1.41215	5.54961	0.00110589	0.00348157	2.95629	down_regulated	RNA polymerase sigma-54 factor
BA_4043	-1.90699	3.7834	3.41e-05	0.000161539	4.46718	down_regulated	RNA polymerase sigma-35 factor
BA_4566	-2.65275	0.575378	0.000988295	0.00314907	3.00511	down_regulated	RNA polymerase sigma-28 factor
BA_2732	-2.69966	-1.34162	0.0915342	0.151931	1.03842	no_significant	RNA polymerase sigma factor SigX
BA_3324	-0.393274	1.86068	0.472709	0.57546	0.325406	no_significant	RNA polymerase sigma factor SigM
BA_4515	-0.604924	8.05212	0.148043	0.223713	0.829611	no_significant	RNA polymerase sigma factor SigA
BA_0426	0.559214	3.66441	0.190879	0.273914	0.719241	no_significant	RNA methyltransferase
BA_1584	-1.00287	1.983	0.299509	0.397895	0.52359	no_significant	RNA methyltransferase
BA_4140	-1.0596	-1.10875	0.306319	0.405277	0.513826	no_significant	RNA methyltransferase
BA_2999	-0.189591	0.971211	0.745542	0.821952	0.127528	no_significant	RNA ligase
BA_1015	-1.26553	3.5894	0.0425324	0.0805816	1.37128	no_significant	ring-cleaving dioxygenase
BA_1016	0.00778207	5.30158	0.986724	1	0.00580438	no_significant	ring-cleaving dioxygenase
BA_3704	-1.43393	-0.178816	0.206495	0.292235	0.68509	no_significant	ring-cleaving dioxygenase
BA_0365	-7.30937	4.20479	1.93e-23	1.63e-21	22.7134	down_regulated	Rieske 2Fe-2S iron-sulfur protein
BA_3998	-0.480294	3.0107	0.292961	0.390801	0.53319	no_significant	ribulose-phosphate 3-epimerase
BA_3948	1.48622	4.94051	0.0049465	0.0127015	2.3057	no_significant	ribosome-binding factor A
BA_5724	1.32738	3.3739	0.0068466	0.0168304	2.16453	no_significant	ribosome-binding ATPase
BA_3962	0.796018	4.4284	0.172651	0.252845	0.76283	no_significant	ribosome recycling factor
BA_3954	-2.29937	1.63669	0.000862793	0.00280225	3.06409	down_regulated	ribosome maturation factor RimP
BA_3980	-3.63805	-0.700205	0.00734644	0.0178298	2.13392	no_significant	ribosome maturation factor RimM
BA_2008	1.34792	5.15156	0.00419129	0.0110316	2.37765	no_significant	ribosome biogenesis GTPase RsgA
BA_3999	-1.99879	1.57277	0.00213917	0.0061877	2.66976	down_regulated	ribosome biogenesis GTPase RsgA
BA_3976	-0.762352	2.916	0.105389	0.170356	0.977205	no_significant	ribosome biogenesis GTPase A
BA_0260	-3.87349	0.237814	5.48e-05	0.00024849	4.26101	down_regulated	ribosomal-protein-alanine acetyltransferase
BA_4369	2.91389	7.90792	7.66e-06	4.2e-05	5.11573	up_regulated	ribosomal-protein-alanine acetyltransferase
BA_4556	-2.91291	-0.00920884	0.00407137	0.0107631	2.39026	no_significant	ribosomal silencing factor RsfS
BA_4537	-2.032	4.89286	1.7e-05	8.65e-05	4.76994	down_regulated	ribosomal protein L11 methyltransferase
BA_2386	0.158718	0.653307	0.834973	0.891345	0.0783274	no_significant	ribosomal large subunit pseudouridine synthase F
BA_1493	-1.76694	3.71725	0.0118871	0.0269526	1.92492	no_significant	ribosomal large subunit pseudouridine synthase B
BA_0049	-0.402424	5.16956	0.338598	0.438468	0.470315	no_significant	ribose-phosphate pyrophosphokinase
BA_2791	0.0797795	1.71338	0.897889	0.935477	0.0467774	no_significant	ribose-5-phosphate isomerase A
BA_0664	-0.620481	5.23565	0.16969	0.249377	0.770344	no_significant	ribose operon repressor
BA_4326	3.50644	3.99156	1.79e-07	1.33e-06	6.74771	up_regulated	ribose operon repressor
BA_0669	-2.72479	5.72808	9.75e-08	7.64e-07	7.01081	down_regulated	ribose ABC transporter substrate-binding protein
BA_0668	-2.81909	6.44875	4.16e-07	2.91e-06	6.38119	down_regulated	ribose ABC transporter permease
BA_0667	-2.07507	6.58493	0.000324523	0.00118588	3.48875	down_regulated	ribose ABC transporter ATP-binding protein
BA_1369	-0.8621	-0.180444	0.238606	0.330341	0.622319	no_significant	ribonucleotide reductase stimulatory protein
BA_1372	1.56911	6.09452	0.000513957	0.00178064	3.28907	up_regulated	ribonucleoside-diphosphate reductase subunit beta
BA_1371	0.467061	7.97563	0.277269	0.37378	0.557099	no_significant	ribonucleoside-diphosphate reductase subunit alpha
BA_0409	1.86862	3.68466	0.00010818	0.000450948	3.96585	up_regulated	ribonuclease-like protein
BA_4364	1.32892	2.28163	0.00374648	0.0100261	2.42638	no_significant	ribonuclease Z
BA_3914	-0.37931	5.46301	0.384631	0.490081	0.414956	no_significant	ribonuclease Y
BA_5334	-2.91672	7.93477	2.3e-09	2.45e-08	8.63883	down_regulated	ribonuclease R
BA_4715	-1.47734	1.52918	0.00887216	0.0209642	2.05197	no_significant	ribonuclease PH
BA_5737	-3.14398	-1.05861	0.017211	0.0370658	1.76419	no_significant	ribonuclease P protein component
BA_0038	0.248598	-1.40118	0.937567	0.961753	0.0279978	no_significant	ribonuclease M5
BA_1640	-3.38492	1.54719	3.78e-06	2.21e-05	5.42235	down_regulated	ribonuclease J
BA_3933	0.576497	3.88635	0.183905	0.265992	0.735406	no_significant	ribonuclease J
BA_4190	1.06263	5.42167	0.0413057	0.07879	1.38399	no_significant	ribonuclease J
BA_3987	-0.0630165	2.3329	0.915528	0.947051	0.0383285	no_significant	ribonuclease III
BA_4798	-1.27548	2.20039	0.0597862	0.106959	1.2234	no_significant	ribonuclease HIII
BA_3975	1.41283	1.86916	0.0541753	0.098556	1.2662	no_significant	ribonuclease HII
BA_4677	-1.22195	0.144771	0.11694	0.184213	0.932038	no_significant	ribonuclease G
BA_0665	-1.46465	6.9117	0.000621551	0.00210826	3.20652	down_regulated	ribokinase
BA_1502	1.83956	9.1899	6.32e-05	0.000282217	4.19924	up_regulated	riboflavin transporter
BA_4332	-2.27497	4.51448	0.000638463	0.00215347	3.19486	down_regulated	riboflavin synthase subunit alpha
BA_4281	2.56002	6.78848	2.98e-06	1.77e-05	5.52645	up_regulated	riboflavin biosynthesis protein RibT
BA_0249	-4.98643	0.290243	7.98e-07	5.31e-06	6.09816	down_regulated	rhomboid protease
BA_2317	-3.65654	0.0435231	0.000139655	0.000565342	3.85494	down_regulated	restriction endonuclease
BA_3153	1.04145	0.426355	0.111072	0.177698	0.954396	no_significant	response regulator
BA_2128	0.737857	1.89765	0.182291	0.264021	0.739234	no_significant	respiratory nitrate reductase subunit gamma
BA_2126	-2.33807	3.35317	3.9e-06	2.27e-05	5.40855	down_regulated	respiratory nitrate reductase subunit beta
BA_2125	-2.32193	3.82853	5.34e-05	0.000242695	4.2722	down_regulated	respiratory nitrate reductase subunit alpha
BA_3753	-5.22977	-1.90764	0.0809759	0.137167	1.09164	no_significant	resolvase
BA_3830	0.344425	0.0598574	0.636602	0.72464	0.196132	no_significant	repressor protein
BA_4070	2.71099	2.11225	0.000107537	0.000449602	3.96844	up_regulated	repressor protein
BA_4126	1.29496	4.02503	0.0070567	0.0172661	2.1514	no_significant	repressor protein
BA_4130	3.48024	5.82472	8.15e-12	1.35e-10	11.0888	up_regulated	repressor protein
BA_0934	-3.51699	1.06334	1.21e-05	6.39e-05	4.91699	down_regulated	replicative DNA helicase
BA_5717	-1.97593	5.19321	0.00513777	0.0131285	2.28923	no_significant	replicative DNA helicase
BA_4823	0.241002	-0.101796	0.778996	0.848823	0.108465	no_significant	replication initiation/membrane attachment protein DnaB
BA_5571	-0.196603	-1.72312	1	1	0	no_significant	release factor glutamine methyltransferase
BA_1200	2.34646	10.0012	7.32e-06	4.02e-05	5.13561	up_regulated	regulatory protein Spx
BA_3456	-0.292521	-0.536525	0.764985	0.838552	0.116347	no_significant	regulatory protein Spx
BA_0516	2.06437	-0.294412	0.00470305	0.0121955	2.32762	no_significant	regulatory protein RecX
BA_4143	-2.01507	3.28239	0.000985713	0.00314322	3.00625	down_regulated	regulatory protein
BA_0263	0.834793	6.87443	0.0637356	0.11292	1.19562	no_significant	redox-sensing transcriptional repressor rex
BA_0021	-1.36404	5.92074	0.00163983	0.00493003	2.7852	down_regulated	recombination protein RecR
BA_4628	-1.40044	2.58556	0.00854357	0.0202561	2.06836	no_significant	recombination protein RarA
BA_3915	1.88524	6.98809	8.58e-06	4.67e-05	5.06635	up_regulated	recombinase A
BA_2691	2.58056	0.40051	0.00283432	0.00789481	2.54755	up_regulated	reactive intermediate/imine deaminase
BA_4949	-1.89275	0.973988	0.00416585	0.0109715	2.3803	no_significant	quorum-quenching lactonase
BA_0784	1.24892	-0.0886327	0.132624	0.204554	0.877377	no_significant	quinone oxidoreductase
BA_4660	-1.15304	6.69931	0.00709625	0.0173427	2.14897	no_significant	quinolinate synthetase A
BA_0700	0.602727	5.72787	0.160046	0.238116	0.795755	no_significant	quinol oxidase subunit IV
BA_0701	-0.846426	7.22195	0.0865634	0.144996	1.06267	no_significant	quinol oxidase subunit III
BA_0703	-0.993028	6.06634	0.0269622	0.0546258	1.56924	no_significant	quinol oxidase subunit II
BA_0702	-1.39701	8.03269	0.022847	0.0475404	1.64117	no_significant	quinol oxidase subunit I
BA_4647	-1.94191	4.78694	3.4e-05	0.000161162	4.46868	down_regulated	queuine tRNA-ribosyltransferase
BA_4520	-0.318502	6.39405	0.478129	0.580714	0.320455	no_significant	pyruvate, phosphate dikinase regulatory protein
BA_4843	-1.71705	8.50994	0.00162697	0.0049019	2.78862	down_regulated	pyruvate kinase
BA_0510	-1.29205	10.5313	0.0152556	0.0333672	1.81657	no_significant	pyruvate formate-lyase-activating enzyme
BA_3909	2.09238	10.7023	6.05e-05	0.000272155	4.21823	up_regulated	pyruvate ferredoxin oxidoreductase subunit beta
BA_3910	-1.20217	8.75037	0.0179768	0.0385177	1.74529	no_significant	pyruvate ferredoxin oxidoreductase subunit alpha
BA_4183	-3.16968	7.97593	1.54e-11	2.41e-10	10.8117	down_regulated	pyruvate dehydrogenase complex E1 component subunit beta
BA_4184	-3.16205	8.83814	3.79e-12	6.78e-11	11.4219	down_regulated	pyruvate dehydrogenase complex E1 component subunit alpha
BA_4182	-4.97589	8.98196	1.16e-15	3.46e-14	14.9355	down_regulated	pyruvate dehydrogenase complex dihydrolipoyllysine-residue acetyltransferase
BA_4181	-4.74837	9.69551	1.55e-23	1.33e-21	22.8102	down_regulated	pyruvate dehydrogenase complex dihydrolipoyl dehydrogenase
BA_4157	-0.279237	8.75875	0.509966	0.611435	0.292459	no_significant	pyruvate carboxylase
BA_0197	-2.52771	3.84924	1.07e-05	5.67e-05	4.97238	down_regulated	pyrroline-5-carboxylate reductase
BA_2995	0.76495	0.342905	0.284204	0.380689	0.546369	no_significant	pyrroline-5-carboxylate reductase
BA_3143	0.0912191	-1.71018	1	1	0	no_significant	pyrroline-5-carboxylate reductase
BA_4359	1.75327	1.19085	0.00273587	0.00764081	2.5629	up_regulated	pyrroline-5-carboxylate reductase
BA_3090	-0.41485	1.3798	0.471561	0.574229	0.326462	no_significant	pyrrolidone-carboxylate peptidase
BA_5390	0.42378	-1.25443	0.798364	0.864509	0.0977992	no_significant	pyrophosphatase PpaX
BA_1894	-1.53946	5.0693	0.00197477	0.00580831	2.70448	down_regulated	pyrimidine-nucleoside phosphorylase
BA_4307	-1.29588	8.44266	0.00250643	0.00706572	2.60094	down_regulated	pyrimidine-nucleoside phosphorylase
BA_0332	-2.56782	-0.032686	0.00306373	0.00842224	2.51375	down_regulated	pyrimidine nucleoside transport protein
BA_0606	-2.05731	-1.07749	0.126654	0.197007	0.89738	no_significant	pyrimidine nucleoside transport protein
BA_1893	-0.0572003	4.31867	0.896936	0.934844	0.0472383	no_significant	pyrimidine nucleoside transport protein
BA_5298	2.76738	3.64882	1.74e-08	1.6e-07	7.7593	up_regulated	pyrimidine nucleoside transport protein
BA_5299	-1.76678	-1.95242	0.336395	0.436286	0.473151	no_significant	pyrimidine nucleoside transport protein
BA_5663	0.497105	5.82112	0.23493	0.326003	0.629062	no_significant	pyridoxine kinase
BA_5099	-1.69686	3.82396	0.0123134	0.0277993	1.90962	no_significant	pyridoxal phosphate-dependent enzyme
BA_0620	-1.55554	4.94991	0.000410724	0.00146027	3.38645	down_regulated	pyridoxal phosphate-dependent acyltransferase
BA_0011	-0.435377	4.70381	0.30729	0.406179	0.512452	no_significant	pyridoxal 5\'-phosphate synthase subunit PdxT
BA_0010	-0.830052	3.73956	0.0872526	0.14586	1.05922	no_significant	pyridoxal 5\'-phosphate synthase subunit PdxS
BA_4725	-0.536569	-1.41786	0.682261	0.765836	0.16605	no_significant	purine permease
BA_5645	0.606363	3.72988	0.163346	0.242089	0.786892	no_significant	purine permease
BA_2991	-0.229749	1.80862	0.743965	0.821064	0.128448	no_significant	purine nucleoside transport protein
BA_1483	-0.820721	4.47686	0.104787	0.169644	0.979691	no_significant	purine nucleoside phosphorylase
BA_4308	-1.76372	8.55198	0.000573793	0.0019681	3.24124	down_regulated	purine nucleoside phosphorylase
BA_5260	1.97193	1.40852	0.000450915	0.00158045	3.34591	up_regulated	purine efflux pump PbuE
BA_0044	-1.17113	2.99108	0.0314687	0.0622858	1.50212	no_significant	pur operon repressor
BA_2728	-0.898869	1.16036	0.122499	0.191892	0.911868	no_significant	pullulanase
BA_4953	-2.78137	1.5385	3.03e-05	0.000145136	4.5186	down_regulated	pullulanase
BA_4270	0.503814	-0.836094	0.562067	0.658511	0.250212	no_significant	PtsGHI operon antiterminator
BA_0631	0.581049	1.72381	0.276599	0.372997	0.558149	no_significant	PTS trehalose transporter subunit IIBC
BA_0372	-0.568345	2.44585	0.333479	0.432771	0.476932	no_significant	PTS transporter subunit IIBC
BA_0823	-0.0623723	5.31515	0.93577	0.960197	0.028831	no_significant	PTS system transporter subunit IIBC
BA_0754	-0.553072	3.17625	0.222094	0.310754	0.653463	no_significant	PTS sucrose transporter subunit IIBC
BA_0501	0.779247	5.39803	0.0622324	0.110583	1.20598	no_significant	PTS N-acetylglucosamine transporter subunit IIBC
BA_4269	-2.11408	4.67615	2.22e-06	1.35e-05	5.65335	down_regulated	PTS glucose transporter subunit IIABC
BA_5563	2.94814	1.95806	7.94e-09	7.81e-08	8.09992	up_regulated	PTS glucose transporter subunit IIA
BA_3846	0.0701429	3.81927	0.91356	0.946412	0.0392629	no_significant	PTS fructose transporter subunit IIABC
BA_0793	-0.949835	-0.251225	0.280978	0.377329	0.551327	no_significant	PTS cellobiose transporter subunit IIC
BA_2463	-5.64404	1.64801	1.84e-12	3.48e-11	11.7344	down_regulated	PTS cellobiose transporter subunit IIC
BA_5443	1.15911	3.09249	0.0171071	0.036861	1.76682	no_significant	PTS cellobiose transporter subunit IIC
BA_5448	-4.34654	3.19981	5.13e-11	7.34e-10	10.2895	down_regulated	PTS cellobiose transporter subunit IIC
BA_2462	-5.68157	-1.6183	0.0221075	0.0462377	1.65546	no_significant	PTS cellobiose transporter subunit IIB
BA_5444	-0.776184	-1.23074	0.619857	0.708398	0.207709	no_significant	PTS cellobiose transporter subunit IIB
BA_5449	-2.16123	-1.6896	0.290179	0.387704	0.537334	no_significant	PTS cellobiose transporter subunit IIB
BA_5447	-4.50784	-2.3007	0.107409	0.17289	0.96896	no_significant	PTS cellobiose transporter subunit IIA
BA_4587	2.41455	6.73184	8.26e-08	6.62e-07	7.08288	up_regulated	pterin-4-alpha-carbinolamine dehydratase
BA_1072	-1.72526	8.0973	0.000937077	0.00301326	3.02822	down_regulated	protoporphyrinogen oxidase
BA_2418	-0.358029	2.63726	0.432609	0.536425	0.363905	no_significant	protoporphyrinogen oxidase
BA_1408	2.55543	2.37892	1.9e-06	1.17e-05	5.7206	up_regulated	proton/sodium-glutamate symporter
BA_1450	0.870137	2.57885	0.0486395	0.090162	1.31301	no_significant	proton/sodium-glutamate symporter
BA_1799	0.216633	-0.990633	0.874786	0.920068	0.0580981	no_significant	proton/sodium-glutamate symporter
BA_5450	-2.39262	-1.5805	0.0880966	0.147037	1.05504	no_significant	proton/sodium-glutamate symporter
BA_4155	1.80895	9.21817	4.94e-05	0.000226028	4.30639	up_regulated	protoheme IX farnesyltransferase
BA_4173	-1.08207	2.91142	0.0315579	0.0623743	1.50089	no_significant	protein-glutamine gamma-glutamyltransferase
BA_5336	3.65205	-1.33774	0.00735802	0.0178374	2.13324	no_significant	protein-export membrane protein SecG
BA_5561	-0.654582	0.840495	0.38215	0.487363	0.417766	no_significant	protein-arginine phosphatase
BA_0078	-2.53878	1.78944	6.94e-05	0.000304704	4.15863	down_regulated	protein-arginine kinase activator protein
BA_0079	-0.82909	5.93137	0.0551166	0.100009	1.25872	no_significant	protein-arginine kinase
BA_4646	1.78254	3.64983	6.14e-05	0.000274486	4.21176	up_regulated	protein translocase subunit YajC
BA_0130	-3.46274	8.25547	4.21e-14	1.04e-12	13.3759	down_regulated	protein translocase subunit SecY
BA_2734	0.802749	3.76722	0.0768263	0.131721	1.11449	no_significant	protein translocase subunit SecY
BA_4641	0.985816	4.1837	0.0747648	0.128719	1.1263	no_significant	protein translocase subunit SecDF
BA_0882	0.257606	1.56729	0.608638	0.69791	0.215641	no_significant	protein translocase subunit SecA
BA_5421	-0.640289	6.97554	0.122726	0.192176	0.911063	no_significant	protein translocase subunit SecA
BA_4001	-1.33934	3.47664	0.0266427	0.0541611	1.57442	no_significant	protein phosphatase PrpC
BA_3265	-0.358929	-1.07506	0.873007	0.919346	0.0589821	no_significant	protease synthase/sporulation protein PAI
BA_0842	0.0714571	7.50257	0.870174	0.917051	0.0603938	no_significant	protease
BA_1506	1.18967	-1.27452	0.372783	0.477008	0.428544	no_significant	protease
BA_4609	-2.09868	2.49033	2.46e-05	0.000120256	4.60927	down_regulated	protease
BA_4610	-0.959835	0.571664	0.120808	0.189572	0.917906	no_significant	protease
BA_5391	-1.41435	0.227105	0.118082	0.185804	0.927816	no_significant	prolipoprotein diacylglyceryl transferase
BA_0396	-0.401246	2.19897	0.470283	0.573337	0.32764	no_significant	proline--tRNA ligase
BA_3957	-0.267611	4.4711	0.54058	0.639033	0.26714	no_significant	proline--tRNA ligase
BA_3020	-2.55527	3.96235	4.64e-08	3.86e-07	7.33386	down_regulated	proline/glycine betaine transporter
BA_0901	1.12631	2.10448	0.0231885	0.0480447	1.63473	no_significant	proline racemase
BA_2834	-2.54431	6.50272	1.33e-07	1.01e-06	6.87588	down_regulated	proline racemase
BA_5253	1.34864	5.72031	0.0019105	0.00564295	2.71885	up_regulated	proline dehydrogenase
BA_5359	-3.24157	-0.965013	0.0301233	0.0600751	1.5211	no_significant	prohead protease
BA_0511	1.36799	2.76368	0.0115973	0.0263952	1.93564	no_significant	processive diacylglycerol beta-glucosyltransferase
BA_4006	-2.66414	1.56486	1.24e-05	6.51e-05	4.90757	down_regulated	primosomal protein N\'
BA_4822	2.49178	3.01614	1.49e-07	1.11e-06	6.82731	up_regulated	primosomal protein DnaI
BA_4629	-3.89946	3.55509	2.37e-13	5.14e-12	12.6251	down_regulated	prespore-specific transcriptional regulator RsfA
BA_5633	-3.43312	7.20058	1.58e-12	3.05e-11	11.8008	down_regulated	prespore-specific transcriptional regulator RsfA
BA_2954	-1.44151	-0.127871	0.107654	0.173153	0.967969	no_significant	prephenate dehydrogenase
BA_4666	1.88376	1.37825	0.000202763	0.000785286	3.69301	up_regulated	prephenate dehydratase
BA_2142	-0.864427	0.650175	0.223806	0.312837	0.650129	no_significant	precorrin-2 dehydrogenase
BA_0741	0.912883	1.02068	0.131918	0.203688	0.879696	no_significant	potassium-transporting ATPase subunit C
BA_0740	-1.4411	2.15232	0.0133128	0.0296107	1.87573	no_significant	potassium-transporting ATPase subunit B
BA_0739	-0.679577	1.84431	0.259042	0.353285	0.58663	no_significant	potassium-transporting ATPase subunit A
BA_4696	-0.48704	3.59823	0.491269	0.593588	0.30868	no_significant	porphobilinogen deaminase
BA_0884	-0.697422	0.758701	0.218051	0.306116	0.661441	no_significant	polysaccharide pyruvyl transferase
BA_1961	-2.14668	-1.69355	0.270528	0.365983	0.567788	no_significant	polysaccharide esterase
BA_0330	0.746922	0.658137	0.256492	0.350148	0.590926	no_significant	polysaccharide deacetylase-like protein
BA_0331	0.0616812	0.506648	0.925502	0.953484	0.0336226	no_significant	polysaccharide deacetylase-like protein
BA_0150	-8.05939	6.04792	6.77e-33	2.59e-30	32.1694	down_regulated	polysaccharide deacetylase
BA_1836	2.21605	0.0936865	0.0129766	0.0290471	1.88684	no_significant	polysaccharide deacetylase
BA_1977	-1.3737	1.35353	0.0262132	0.0534947	1.58148	no_significant	polysaccharide deacetylase
BA_2944	-0.432572	5.30453	0.340107	0.439841	0.468385	no_significant	polysaccharide deacetylase
BA_3679	-2.59063	-1.4244	0.115757	0.183104	0.936454	no_significant	polysaccharide deacetylase
BA_5436	-4.17248	2.11811	6.2e-12	1.06e-10	11.2075	down_regulated	polysaccharide deacetylase
BA_3944	0.12176	7.05714	0.808972	0.873341	0.0920662	no_significant	polyribonucleotide nucleotidyltransferase
BA_4208	-0.453762	2.47412	0.310189	0.408983	0.508374	no_significant	polyphosphate kinase
BA_1329	0.927598	3.15564	0.0870871	0.145699	1.06005	no_significant	polyhydroxyalkanoic acid synthase subunit PhaR
BA_1327	1.94716	7.78984	0.000679344	0.00226952	3.16791	up_regulated	polyhydroxyalkanoic acid inclusion protein
BA_1328	1.60179	5.10428	0.0318363	0.0628065	1.49708	no_significant	poly-beta-hydroxybutyrate-responsive repressor
BA_5445	0.320687	-0.653609	0.785997	0.855122	0.104579	no_significant	polyamine aminopropyltransferase
BA_5619	-3.76859	3.78788	2.43e-10	3.15e-09	9.61502	down_regulated	polyamine aminopropyltransferase
BA_1331	1.28626	6.85345	0.00358823	0.00966203	2.44512	up_regulated	poly(3-hydroxyalkanoate) polymerase subunit PhaC
BA_3955	-2.72426	5.85472	4.59e-09	4.7e-08	8.33799	down_regulated	PolC-type DNA polymerase III
BA_5595	3.03661	-0.215031	0.0017146	0.00512189	2.76584	up_regulated	plcR; pseudogene
BA_3536	-0.0457938	2.84159	0.922707	0.951903	0.034936	no_significant	PhzF family epimerase
BA_4952	-0.858926	1.19337	0.16345	0.242153	0.786614	no_significant	phosphotransferase
BA_3321	-0.523493	1.09862	0.407294	0.512284	0.390092	no_significant	phosphoserine aminotransferase
BA_0297	-2.29985	-1.60828	0.187693	0.270356	0.726551	no_significant	phosphoribosylglycinamide formyltransferase
BA_0292	-1.80196	-0.832704	0.133282	0.205214	0.875228	no_significant	phosphoribosylformylglycinamidine synthase subunit PurS
BA_0293	-2.41354	2.81608	0.002284	0.00656182	2.6413	down_regulated	phosphoribosylformylglycinamidine synthase subunit PurQ
BA_0294	-3.07891	3.62739	0.000148922	0.00059658	3.82704	down_regulated	phosphoribosylformylglycinamidine synthase subunit PurL
BA_0296	-3.47803	0.68877	1.44e-05	7.48e-05	4.84093	down_regulated	phosphoribosylformylglycinamidine cyclo-ligase
BA_5872	-2.79656	-0.132373	0.00317248	0.00867895	2.4986	down_regulated	phosphoribosyl-AMP cyclohydrolase
BA_0291	-0.164113	2.60489	0.729334	0.807204	0.137074	no_significant	phosphoribosylaminoimidazole-succinocarboxamide synthase
BA_0299	-2.38868	-0.155136	0.0118467	0.0268901	1.9264	no_significant	phosphoribosylamine--glycine ligase
BA_4309	-1.84653	7.5243	0.000412267	0.00146329	3.38482	down_regulated	phosphopentomutase
BA_4007	-1.25842	1.80186	0.0229854	0.0477543	1.63855	no_significant	phosphopantothenoylcysteine decarboxylase/phosphopantothenate--cysteine ligase
BA_4139	-0.610625	0.436372	0.320526	0.419511	0.494136	no_significant	phosphopantetheine adenylyltransferase
BA_1340	-2.73166	0.576149	0.000145851	0.000585353	3.83609	down_regulated	phosphonoacetaldehyde hydrolase
BA_3747	-1.76443	-1.25695	0.191065	0.274085	0.718819	no_significant	phosphonate ABC transporter permease
BA_3748	-1.04204	-0.316545	0.314409	0.413639	0.502505	no_significant	phosphonate ABC transporter permease
BA_4052	-1.50426	1.2088	0.0207724	0.0437938	1.68251	no_significant	phospho-N-acetylmuramoyl-pentapeptide-transferase
BA_5463	-1.36151	8.33994	0.00123453	0.00382186	2.9085	down_regulated	phosphomethylpyrimidine synthase
BA_4137	-2.32443	0.379088	0.0108769	0.0248903	1.96349	no_significant	phospholipase
BA_4807	-0.25025	-0.568727	0.800493	0.866188	0.0966424	no_significant	phosphohydrolase
BA_2044	-2.09481	-0.346256	0.0387029	0.0746375	1.41226	no_significant	phosphoglycerate mutase family protein
BA_5367	-3.35628	8.4569	2.39e-08	2.12e-07	7.62201	down_regulated	phosphoglycerate kinase
BA_0157	0.104075	4.63081	0.822939	0.882529	0.0846325	no_significant	phosphoglucosamine mutase
BA_5153	-0.0777685	2.95101	0.864958	0.913156	0.0630051	no_significant	phosphoglucomutase
BA_1241	-1.22236	6.49353	0.0801768	0.136221	1.09595	no_significant	phosphoesterase
BA_3071	0.756228	-1.54624	0.613295	0.702101	0.212331	no_significant	phosphoesterase
BA_4267	-1.94819	7.51528	5.96e-06	3.33e-05	5.22482	down_regulated	phosphoenolpyruvate-protein phosphotransferase
BA_3116	-0.677723	2.64398	0.145676	0.220952	0.836612	no_significant	phosphoenolpyruvate synthase
BA_5019	0.273919	11.9802	0.521655	0.621823	0.282617	no_significant	phosphoenolpyruvate carboxykinase
BA_4268	-1.98209	4.45988	0.00017853	0.000700465	3.74829	down_regulated	phosphocarrier protein HPr
BA_5381	0.335718	2.12628	0.570003	0.665215	0.244122	no_significant	phosphocarrier protein HPr
BA_4565	-4.57239	1.63691	4.34e-10	5.36e-09	9.36201	down_regulated	phosphatidylserine decarboxylase
BA_1486	-0.00751079	4.04318	0.983146	0.999785	0.00738204	no_significant	phosphatidylglycerol lysyltransferase
BA_3960	-1.32924	0.41419	0.0746121	0.128561	1.12719	no_significant	phosphatidate cytidylyltransferase
BA_1471	-1.2192	1.32553	0.0353428	0.0686614	1.4517	no_significant	phosphate transporter
BA_4492	-0.546614	2.95649	0.301984	0.400551	0.520016	no_significant	phosphate transport system regulatory protein PhoU
BA_4529	-3.40273	4.06666	4.44e-10	5.43e-09	9.35221	down_regulated	phosphate starvation-inducible protein PhoH
BA_4388	-1.92045	5.59447	9.79e-05	0.000414036	4.00931	down_regulated	phosphate butyryltransferase
BA_3991	-2.76978	2.90306	5.49e-07	3.77e-06	6.26038	down_regulated	phosphate acyltransferase
BA_5636	-6.71185	5.04232	1.84e-22	1.29e-20	21.7345	down_regulated	phosphate acetyltransferase
BA_0715	2.06454	-0.424739	0.0203318	0.0430374	1.69183	no_significant	phosphate ABC transporter substrate-binding protein
BA_4496	-1.61978	3.21604	0.00447307	0.0116855	2.34939	no_significant	phosphate ABC transporter substrate-binding protein
BA_0716	0.167825	-0.198768	0.877159	0.921618	0.0569218	no_significant	phosphate ABC transporter permease
BA_0717	-0.467039	1.12459	0.437963	0.541468	0.358562	no_significant	phosphate ABC transporter permease
BA_4494	-1.24377	3.04272	0.0698376	0.12153	1.15591	no_significant	phosphate ABC transporter permease
BA_4495	-0.68429	3.7747	0.158996	0.236721	0.798614	no_significant	phosphate ABC transporter permease
BA_4493	0.0711562	4.88577	0.880973	0.924264	0.0550373	no_significant	phosphate ABC transporter ATP-binding protein
BA_1174	-1.57869	3.28797	0.00204546	0.00597593	2.68921	down_regulated	phosphatase
BA_2309	1.76284	3.4325	0.00637948	0.0158488	2.19521	no_significant	phosphatase
BA_2634	2.6215	3.86894	2.31e-06	1.4e-05	5.63711	up_regulated	phosphatase
BA_3545	-1.29879	-0.349001	0.130947	0.20256	0.882906	no_significant	phosphatase
BA_4188	-0.397226	-0.970154	0.839002	0.894284	0.0762369	no_significant	phosphatase
BA_4803	-1.81434	6.3864	0.000336954	0.00122492	3.47243	down_regulated	phenylalanine--tRNA ligase subunit beta
BA_4804	-1.92103	3.01816	0.000312574	0.00115169	3.50505	down_regulated	phenylalanine--tRNA ligase subunit alpha
BA_4586	-0.459472	9.01201	0.329253	0.42861	0.48247	no_significant	phenylalanine-4-hydroxylase
BA_1855	-2.20396	1.09966	0.00346474	0.00937577	2.46033	down_regulated	PGA biosynthesis protein
BA_1985	0.097879	5.76534	0.82601	0.88492	0.0830148	no_significant	petrobactin biosynthesis protein AsbE
BA_1982	-1.45235	8.39092	0.00102981	0.00326897	2.98724	down_regulated	petrobactin biosynthesis protein AsbB
BA_1981	1.51129	8.16664	0.00110578	0.00348157	2.95633	up_regulated	petrobactin biosynthesis protein AsbA
BA_1984	-1.68865	3.50363	0.000493296	0.00171755	3.30689	down_regulated	petrobactin biosynthesis aryl carrier protein AsbD
BA_0536	-3.37115	2.45192	8.56e-07	5.66e-06	6.06774	down_regulated	peroxiredoxin
BA_0537	4.44881	3.77237	1.44e-16	4.93e-15	15.8427	up_regulated	peroxide operon regulator
BA_0844	0.610755	-0.315562	0.444721	0.548533	0.351912	no_significant	permease
BA_2577	0.0564214	-0.564697	1	1	0	no_significant	permease
BA_2628	-0.339509	3.49277	0.444943	0.548646	0.351695	no_significant	permease
BA_5090	-3.24497	0.912902	0.000482236	0.00168322	3.31674	down_regulated	permease
BA_0050	1.55535	0.51576	0.00456791	0.0118964	2.34028	no_significant	peptidyl-tRNA hydrolase
BA_4283	-2.18388	4.6043	1.05e-06	6.88e-06	5.97812	down_regulated	peptidyl-prolyl cis-trans isomerase B
BA_5687	-0.883378	1.39794	0.141413	0.21562	0.84951	no_significant	peptide methionine sulfoxide reductase MsrA/MsrB
BA_1846	-1.00556	4.53632	0.0192688	0.0408904	1.71514	no_significant	peptide methionine sulfoxide reductase MsrA
BA_4187	0.545959	3.59517	0.215304	0.302865	0.666949	no_significant	peptide deformylase
BA_5420	-0.308332	3.50306	0.500338	0.602296	0.300736	no_significant	peptide chain release factor 2
BA_5572	0.0644565	3.13727	0.917533	0.947494	0.0373783	no_significant	peptide chain release factor 1
BA_3872	1.13942	4.17763	0.0391455	0.0752495	1.40732	no_significant	peptidase T
BA_0165	-1.29005	0.133233	0.137389	0.210743	0.862049	no_significant	peptidase
BA_0724	0.61811	0.0799024	0.381225	0.486496	0.418819	no_significant	peptidase
BA_1124	-1.82933	4.50306	0.000139077	0.000563714	3.85674	down_regulated	peptidase
BA_1318	0.747305	-1.52817	0.575355	0.669787	0.240064	no_significant	peptidase
BA_1449	2.0404	0.800603	0.000492445	0.00171601	3.30764	up_regulated	peptidase
BA_1500	-5.56717	-1.68613	0.0498879	0.0921512	1.30201	no_significant	peptidase
BA_1774	2.94899	3.00528	7.5e-10	8.64e-09	9.12486	up_regulated	peptidase
BA_1879	-0.263884	-1.18932	0.837427	0.893284	0.0770531	no_significant	peptidase
BA_1903	-0.129417	-0.260638	0.918256	0.948008	0.0370364	no_significant	peptidase
BA_4014	-1.27625	3.60747	0.0108106	0.0247655	1.96615	no_significant	peptidase
BA_4368	0.0447913	5.66957	0.917291	0.947477	0.037493	no_significant	peptidase
BA_4422	-0.896042	5.40677	0.0480072	0.0891671	1.31869	no_significant	peptidase
BA_2238	-0.128952	3.00266	0.76943	0.842108	0.113831	no_significant	penicillin-binding protein 3
BA_2345	0.579667	4.52078	0.179129	0.260338	0.746833	no_significant	penicillin-binding protein 1A
BA_1069	-5.80253	2.81839	2.37e-13	5.14e-12	12.6255	down_regulated	penicillin-binding protein 1
BA_0502	1.65251	0.498826	0.00800609	0.0191676	2.09658	no_significant	penicillin-binding protein
BA_0543	0.696363	-0.729433	0.567161	0.663083	0.246293	no_significant	penicillin-binding protein
BA_1474	-3.31682	2.47985	5.38e-10	6.41e-09	9.26908	down_regulated	penicillin-binding protein
BA_1572	-0.753772	3.89783	0.0808541	0.137071	1.0923	no_significant	penicillin-binding protein
BA_2504	0.537664	-0.885786	0.674967	0.758661	0.170718	no_significant	penicillin-binding protein
BA_2575	1.82627	-0.714483	0.0404282	0.0773969	1.39332	no_significant	penicillin-binding protein
BA_2648	-0.0196354	3.68629	0.977739	0.995249	0.00977724	no_significant	penicillin-binding protein
BA_2650	1.32499	3.38442	0.00728797	0.0177084	2.13739	no_significant	penicillin-binding protein
BA_3554	1.62256	2.33006	0.00116913	0.0036452	2.93214	up_regulated	penicillin-binding protein
BA_4055	-0.656958	3.86061	0.141533	0.215685	0.849141	no_significant	penicillin-binding protein
BA_4497	-1.30298	4.81638	0.00531084	0.013546	2.27484	no_significant	penicillin-binding protein
BA_4606	-3.28556	0.280089	0.000727371	0.00241844	3.13824	down_regulated	penicillin-binding protein
BA_5623	-5.59142	4.13643	1.08e-16	3.78e-15	15.967	down_regulated	penicillin-binding protein
BA_1078	1.68573	-0.93136	0.101803	0.165641	0.99224	no_significant	penicillinase repressor
BA_1563	0.108814	1.92248	0.828188	0.886576	0.0818713	no_significant	pantothenate synthetase
BA_2901	2.40513	1.94734	1.22e-05	6.45e-05	4.91253	up_regulated	pantothenate kinase
BA_5211	0.295259	-0.53883	0.772367	0.844883	0.112176	no_significant	PadR family transcriptional regulator
BA_4542	0.404612	-1.34182	0.744136	0.821064	0.128348	no_significant	oxygen-independent coproporphyrinogen-III oxidase
BA_0875	2.41735	2.58924	2.85e-06	1.7e-05	5.54566	up_regulated	oxygen-independent coproporphyrinogen III oxidase
BA_0176	-9.77736	1.64298	4.49e-14	1.09e-12	13.348	down_regulated	oxidoreductase
BA_0196	0.490884	4.97708	0.318539	0.417635	0.496838	no_significant	oxidoreductase
BA_0748	-4.96868	1.14355	2.59e-08	2.27e-07	7.58665	down_regulated	oxidoreductase
BA_1004	-8.66066	0.659585	7.48e-10	8.64e-09	9.12616	down_regulated	oxidoreductase
BA_1847	-6.26334	2.84086	8.89e-16	2.71e-14	15.051	down_regulated	oxidoreductase
BA_1958	0.981023	-0.300111	0.330665	0.429915	0.480612	no_significant	oxidoreductase
BA_2020	-1.25735	-0.0253037	0.176819	0.257782	0.752471	no_significant	oxidoreductase
BA_2113	-1.37311	1.10235	0.203962	0.289525	0.690451	no_significant	oxidoreductase
BA_2511	-3.44947	-0.147135	0.000701678	0.00233855	3.15386	down_regulated	oxidoreductase
BA_2715	-1.26555	0.14042	0.0790271	0.134843	1.10222	no_significant	oxidoreductase
BA_2778	-0.201604	-0.325848	0.858763	0.908897	0.0661267	no_significant	oxidoreductase
BA_3204	1.91973	-0.107981	0.00310679	0.00852391	2.50769	up_regulated	oxidoreductase
BA_3385	-1.25147	0.788565	0.0323521	0.0636449	1.4901	no_significant	oxidoreductase
BA_3440	-1.73825	2.00897	0.00117204	0.00364885	2.93106	down_regulated	oxidoreductase
BA_3446	-0.215492	2.90566	0.651678	0.739002	0.185967	no_significant	oxidoreductase
BA_3463	-0.888951	1.89294	0.165052	0.243728	0.782379	no_significant	oxidoreductase
BA_3508	2.49586	1.48438	9.91e-05	0.00041736	4.00398	up_regulated	oxidoreductase
BA_3544	0.256533	1.00319	0.756804	0.831319	0.121016	no_significant	oxidoreductase
BA_3566	1.10171	-0.304994	0.198806	0.283259	0.70157	no_significant	oxidoreductase
BA_4249	-0.50691	6.5027	0.39932	0.504215	0.398679	no_significant	oxidoreductase
BA_4318	-1.39261	2.81558	0.00465622	0.0120889	2.33197	no_significant	oxidoreductase
BA_4357	-1.32643	-2.11873	0.566705	0.663021	0.246643	no_significant	oxidoreductase
BA_4874	0.263147	1.29736	0.619049	0.707874	0.208275	no_significant	oxidoreductase
BA_4923	-1.1973	1.1238	0.0519663	0.0952376	1.28428	no_significant	oxidoreductase
BA_5079	-1.86414	3.15254	0.00025964	0.000976787	3.58563	down_regulated	oxidoreductase
BA_5308	-1.92956	1.6897	0.000575988	0.0019696	3.23959	down_regulated	oxidoreductase
BA_5564	0.646735	0.383483	0.316117	0.415366	0.500152	no_significant	oxidoreductase
BA_5107	-2.73303	1.68404	0.00214054	0.0061877	2.66948	down_regulated	O-succinylbenzoate synthase
BA_3705	0.0993678	-0.58143	0.94206	0.964768	0.0259216	no_significant	osmoregulated proline transporter
BA_5694	-0.609045	-0.517297	0.544889	0.642682	0.263692	no_significant	osmoprotectant transporter
BA_4022	1.12384	3.95448	0.0676543	0.118614	1.1697	no_significant	orotidine 5\'-phosphate decarboxylase
BA_4021	0.775891	4.7871	0.0794768	0.135281	1.09976	no_significant	orotate phosphoribosyltransferase
BA_0026	-5.69096	-1.63181	0.0314911	0.0623008	1.50181	no_significant	ornithine/lysine/arginine decarboxylase
BA_4351	4.68973	4.02467	1.48e-11	2.32e-10	10.8309	up_regulated	ornithine carbamoyltransferase(argF)
BA_1154	0.721908	7.75986	0.0862669	0.144557	1.06416	no_significant	ornithine aminotransferase
BA_4700	-2.5762	1.8099	3.29e-06	1.94e-05	5.48341	down_regulated	organic hydroperoxide resistance protein
BA_4611	-2.98864	-1.15111	0.0569272	0.102718	1.24468	no_significant	O-methyltransferase family protein
BA_0031	0.97393	1.09421	0.0902347	0.150129	1.04463	no_significant	O-methyltransferase
BA_0189	3.14909	2.04036	3.23e-10	4.08e-09	9.49046	up_regulated	oligopeptide ABC transporter substrate-binding protein
BA_0194	-0.825029	0.34361	0.370004	0.47374	0.431794	no_significant	oligopeptide ABC transporter substrate-binding protein
BA_0195	0.162194	6.24484	0.702255	0.783471	0.153505	no_significant	oligopeptide ABC transporter substrate-binding protein
BA_0231	3.4419	4.31355	4.21e-11	6.1e-10	10.376	up_regulated	oligopeptide ABC transporter substrate-binding protein
BA_0656	-1.53854	7.44851	0.0012065	0.00374782	2.91847	down_regulated	oligopeptide ABC transporter substrate-binding protein
BA_0908	0.390559	3.03116	0.427236	0.5318	0.369332	no_significant	oligopeptide ABC transporter substrate-binding protein
BA_1191	-0.218195	4.39067	0.649999	0.737759	0.187087	no_significant	oligopeptide ABC transporter substrate-binding protein
BA_1197	-0.114707	1.45336	0.896177	0.934388	0.0476062	no_significant	oligopeptide ABC transporter substrate-binding protein
BA_2041	2.62385	8.09794	8.66e-08	6.91e-07	7.06242	up_regulated	oligopeptide ABC transporter substrate-binding protein
BA_2848	1.62933	4.86269	0.000236652	0.00090323	3.62589	up_regulated	oligopeptide ABC transporter substrate-binding protein
BA_3642	-3.56777	3.61259	1.02e-11	1.66e-10	10.9931	down_regulated	oligopeptide ABC transporter substrate-binding protein
BA_3644	2.18603	4.03025	0.000257231	0.000970631	3.58968	up_regulated	oligopeptide ABC transporter substrate-binding protein
BA_3645	0.253701	6.36014	0.553144	0.650231	0.257162	no_significant	oligopeptide ABC transporter substrate-binding protein
BA_4729	0.0804136	-0.0516288	0.951707	0.971809	0.0214965	no_significant	oligopeptide ABC transporter substrate-binding protein
BA_4731	0.651937	-0.411091	0.481556	0.584033	0.317353	no_significant	oligopeptide ABC transporter substrate-binding protein
BA_0185	1.28644	-1.26125	0.26668	0.361475	0.574009	no_significant	oligopeptide ABC transporter permease
BA_0186	0.0169116	-0.872503	1	1	0	no_significant	oligopeptide ABC transporter permease
BA_0232	2.47371	0.595727	0.0001749	0.000686863	3.75721	up_regulated	oligopeptide ABC transporter permease
BA_0233	1.09351	1.46481	0.145356	0.22063	0.837568	no_significant	oligopeptide ABC transporter permease
BA_0657	-3.46751	3.51223	2.5e-08	2.21e-07	7.60158	down_regulated	oligopeptide ABC transporter permease
BA_0658	-2.0998	3.80334	4.85e-05	0.000222348	4.31399	down_regulated	oligopeptide ABC transporter permease
BA_0909	1.8417	1.16263	0.000447448	0.00157007	3.34926	up_regulated	oligopeptide ABC transporter permease
BA_0910	-0.103566	1.01234	0.923388	0.951938	0.0346156	no_significant	oligopeptide ABC transporter permease
BA_1192	0.0412481	4.43327	0.92342	0.951938	0.0346005	no_significant	oligopeptide ABC transporter permease
BA_1193	-0.511109	5.24923	0.234111	0.325082	0.630578	no_significant	oligopeptide ABC transporter permease
BA_4732	1.31087	1.30203	0.00682073	0.0167766	2.16617	no_significant	oligopeptide ABC transporter permease
BA_0187	0.618683	0.35823	0.33077	0.429919	0.480474	no_significant	oligopeptide ABC transporter ATP-binding protein
BA_0188	-0.594948	0.707585	0.449046	0.552733	0.347709	no_significant	oligopeptide ABC transporter ATP-binding protein
BA_0234	-0.296841	2.49526	0.681848	0.765782	0.166312	no_significant	oligopeptide ABC transporter ATP-binding protein
BA_0235	0.838416	5.18375	0.0486196	0.090162	1.31319	no_significant	oligopeptide ABC transporter ATP-binding protein
BA_0659	-1.10799	5.38276	0.0262707	0.0535714	1.58053	no_significant	oligopeptide ABC transporter ATP-binding protein
BA_0912	-1.65099	2.56842	0.0230632	0.0478324	1.63708	no_significant	oligopeptide ABC transporter ATP-binding protein
BA_1194	-1.73231	7.28353	0.0348872	0.0679016	1.45733	no_significant	oligopeptide ABC transporter ATP-binding protein
BA_1195	-0.0710867	7.82802	0.866604	0.914434	0.0621794	no_significant	oligopeptide ABC transporter ATP-binding protein
BA_4733	0.339388	1.70021	0.48258	0.585105	0.316431	no_significant	oligopeptide ABC transporter ATP-binding protein
BA_4734	-0.026225	0.872673	1	1	0	no_significant	oligopeptide ABC transporter ATP-binding protein
BA_2583	4.55634	2.89591	4.6e-13	9.76e-12	12.3375	up_regulated	oligopeptidase
BA_2825	0.414946	-0.752142	0.650056	0.737759	0.187049	no_significant	oligopeptidase
BA_1206	1.31881	7.21896	0.0097808	0.0227156	2.00963	no_significant	oligoendopeptidase F
BA_1353	-0.662136	5.96249	0.118069	0.185804	0.927862	no_significant	oligoendopeptidase F
BA_3553	2.9605	5.06426	7.84e-07	5.23e-06	6.10592	up_regulated	oligoendopeptidase F
BA_5706	-0.451628	6.84912	0.281631	0.377964	0.55032	no_significant	oligoendopeptidase F
BA_0371	-1.03417	1.17263	0.0536657	0.0978405	1.2703	no_significant	oligo-1,6-glucosidase
BA_4231	0.797079	2.61915	0.082268	0.138781	1.08477	no_significant	oligo-1,6-glucosidase
BA_4431	-0.414903	-0.50959	0.67601	0.759631	0.170047	no_significant	octanoyltransferase LipM
BA_5635	-0.735314	1.99431	0.115129	0.182381	0.938815	no_significant	octanoyl
BA_3580	-3.50405	1.35355	1.07e-07	8.25e-07	6.97016	down_regulated	O-acetyltransferase
BA_4601	-1.34069	3.24329	0.0498452	0.092113	1.30238	no_significant	O-acetylserine dependent cystathionine beta-synthase
BA_5656	-0.0398303	7.90409	0.931798	0.957663	0.030678	no_significant	O-acetylhomoserine/O-acetylserine sulfhydrylase
BA_5385	-2.61793	1.94676	6.5e-05	0.000288256	4.18728	down_regulated	nudix hydrolase
BA_0542	-2.70934	-1.42187	0.0497807	0.0920341	1.30294	no_significant	nudix family protein
BA_0622	0.226838	-1.81469	1	1	0	no_significant	nudix family protein
BA_1816	-2.72327	3.37911	1.39e-06	8.78e-06	5.858	down_regulated	nudix family protein
BA_1964	1.60143	5.4315	0.00230578	0.00661084	2.63718	up_regulated	nudix family protein
BA_1997	0.73416	-1.27052	0.651195	0.738653	0.186289	no_significant	nudix family protein
BA_2047	-5.14341	-1.96586	0.0945476	0.155934	1.02435	no_significant	nudix family protein
BA_2071	1.41415	2.87507	0.00298351	0.00823943	2.52527	up_regulated	nudix family protein
BA_2261	1.60934	2.65633	0.00037575	0.00135416	3.4251	up_regulated	nudix family protein
BA_2676	1.30282	-0.403401	0.10633	0.171658	0.973343	no_significant	nudix family protein
BA_2685	2.59166	-0.340536	0.00256534	0.00722209	2.59086	up_regulated	nudix family protein
BA_2755	3.6254	0.399425	2.98e-07	2.15e-06	6.52629	up_regulated	nudix family protein
BA_2781	0.200614	-1.76514	1	1	0	no_significant	nudix family protein
BA_2926	1.90891	0.828504	0.00383081	0.0102042	2.41671	no_significant	nudix family protein
BA_3044	0.690639	-0.319185	0.396179	0.501152	0.402108	no_significant	nudix family protein
BA_3685	1.39014	1.33393	0.00755102	0.0182631	2.12199	no_significant	nudix family protein
BA_4241	-1.2528	0.233681	0.0622634	0.110591	1.20577	no_significant	nudix family protein
BA_4380	-1.18179	3.23983	0.106311	0.171658	0.973421	no_significant	nudix family protein
BA_4887	0.893772	-0.849259	0.391888	0.497519	0.406838	no_significant	nudix family protein
BA_4491	0.550907	2.27677	0.279918	0.376265	0.55297	no_significant	nucleotidyltransferase family protein
BA_0363	3.75696	-0.858663	0.00346168	0.00937529	2.46071	up_regulated	nucleotidyltransferase
BA_5384	-0.670504	6.26062	0.114024	0.180976	0.943003	no_significant	nucleotide-binding protein
BA_4540	-3.05169	5.46037	2.47e-11	3.71e-10	10.6078	down_regulated	nucleotide exchange factor GrpE
BA_2400	-1.93479	1.62213	0.0268146	0.0544316	1.57163	no_significant	nucleoside hydrolase
BA_2888	-1.80009	-0.869162	0.127142	0.19762	0.89571	no_significant	nucleoside hydrolase
BA_3606	-5.87739	1.08971	2.24e-10	2.92e-09	9.65062	down_regulated	nucleoside hydrolase
BA_5338	-3.2858	0.168643	8.54e-05	0.000366332	4.06877	down_regulated	nucleoside hydrolase
BA_1536	-0.400982	3.48554	0.394203	0.499253	0.40428	no_significant	nucleoside diphosphate kinase
BA_5731	-0.778783	2.85098	0.107599	0.17313	0.968192	no_significant	nucleoid occlusion protein
BA_2359	-1.22949	2.04594	0.0165744	0.0359155	1.78056	no_significant	nuclease SbcCD subunit D
BA_2360	0.0309701	3.2625	0.94699	0.96858	0.0236544	no_significant	nuclease SbcCD subunit C
BA_1075	-0.383262	3.82236	0.39823	0.503292	0.399866	no_significant	nuclease
BA_3283	3.11751	4.56795	8.58e-06	4.67e-05	5.0664	up_regulated	NTD biosynthesis operon regulator NtdR
BA_0339	-0.965726	4.82908	0.0647235	0.114381	1.18894	no_significant	N-succinyl amino acid racemase
BA_2372	-3.48567	9.50502	1.23e-12	2.43e-11	11.9091	down_regulated	nonribosomal peptide synthase DhbF
BA_0808	-5.38272	-1.8126	0.0658205	0.116027	1.18164	no_significant	non-homologous end joining protein Ku
BA_4714	-1.23826	0.755552	0.107764	0.173263	0.967527	no_significant	non-canonical purine NTP pyrophosphatase
BA_2816	0.742667	3.03507	0.139585	0.213554	0.85516	no_significant	N-methyl-transferase
BA_2257	-0.544076	1.51567	0.319373	0.418463	0.495702	no_significant	nitroreductase family protein
BA_1385	-0.86249	2.66849	0.160439	0.238448	0.794689	no_significant	nitronate monooxygenase
BA_2145	-1.69416	0.763521	0.0807009	0.136921	1.09312	no_significant	nitrite reductase
BA_2146	-2.95744	3.76873	4.32e-07	3.01e-06	6.36467	down_regulated	nitrite reductase
BA_2138	0.699912	0.86124	0.210859	0.297409	0.676008	no_significant	nitrite extrusion protein
BA_5695	-1.87647	3.82267	0.0115355	0.0262688	1.93796	no_significant	nitric-oxide synthase oxygenase subunit
BA_2127	-2.0832	0.806902	0.00474019	0.0122481	2.3242	no_significant	nitrate reductase molybdenum cofactor assembly chaperone
BA_4661	-2.09786	4.82805	0.00207833	0.00604526	2.68229	down_regulated	nicotinate-nucleotide diphosphorylase
BA_4558	-1.94152	0.35136	0.0069005	0.0169332	2.16112	no_significant	nicotinate-nucleotide adenylyltransferase
BA_0596	-0.912854	4.09888	0.0343297	0.0669406	1.46433	no_significant	nicotinate phosphoribosyltransferase
BA_0199	0.157944	-0.799201	0.948588	0.969801	0.0229223	no_significant	nicotinamide riboside transporter PnuC
BA_5668	1.57378	4.78858	0.000344424	0.00125099	3.46291	up_regulated	niacin/nicotinamide transporter NaiP
BA_1998	-3.48308	2.68033	1.44e-07	1.08e-06	6.84039	down_regulated	NH(3)-dependent NAD(+) synthetase
BA_0493	-0.411924	0.952226	0.508398	0.60973	0.293796	no_significant	N-formyl-4-amino-5-aminomethyl-2-methylpyrimidine deformylase
BA_5282	0.358672	1.62691	0.521734	0.621823	0.282551	no_significant	neutral protease B
BA_5109	-0.0596184	6.47043	0.887303	0.929051	0.0519279	no_significant	naphthoate synthase
BA_1511	-0.0286343	7.28787	0.945899	0.967758	0.0241552	no_significant	NAD-specific glutamate dehydrogenase
BA_0838	2.07853	1.80298	3.38e-05	0.000160624	4.47063	up_regulated	NADPH-quinone reductase
BA_1362	0.81356	0.229665	0.236362	0.327666	0.626422	no_significant	NADPH-dependent 7-cyano-7-deazaguanine reductase
BA_2038	1.01154	2.115	0.0245959	0.0506612	1.60914	no_significant	NADPH dehydrogenase
BA_0849	-0.176092	2.40519	0.774142	0.846231	0.111179	no_significant	NADP-dependent glyceraldehyde-3-phosphate dehydrogenase
BA_5532	-0.545638	7.05259	0.248443	0.341264	0.604773	no_significant	NADH-quinone oxidoreductase subunit N
BA_5533	-1.33653	8.44906	0.0588105	0.105639	1.23054	no_significant	NADH-quinone oxidoreductase subunit M
BA_5534	-1.12307	8.73421	0.0476416	0.0886248	1.32201	no_significant	NADH-quinone oxidoreductase subunit L
BA_5535	0.079331	5.92858	0.850265	0.902173	0.0704457	no_significant	NADH-quinone oxidoreductase subunit K
BA_5536	-1.4565	5.95472	0.00558478	0.0141674	2.25299	no_significant	NADH-quinone oxidoreductase subunit J
BA_5537	-1.88878	6.14438	0.00376013	0.0100477	2.4248	no_significant	NADH-quinone oxidoreductase subunit I
BA_5538	-0.709615	7.38437	0.125081	0.195066	0.902807	no_significant	NADH-quinone oxidoreductase subunit H
BA_5539	-1.78127	6.25557	0.0269608	0.0546258	1.56927	no_significant	NADH-quinone oxidoreductase subunit D
BA_5540	-1.34605	2.22315	0.0836275	0.140808	1.07765	no_significant	NADH-quinone oxidoreductase subunit C
BA_5541	-2.58184	4.83667	0.000737286	0.00244753	3.13236	down_regulated	NADH-quinone oxidoreductase subunit B
BA_5542	-0.0165108	3.57119	0.97878	0.995587	0.00931474	no_significant	NADH-quinone oxidoreductase subunit A
BA_3183	0.148115	-0.207687	0.858417	0.908759	0.0663018	no_significant	NADH-quinone oxidoreductase subunit 5
BA_3707	-1.62462	0.0796224	0.0516325	0.094785	1.28708	no_significant	NADH-dependent flavin oxidoreductase
BA_5159	-4.21268	2.34319	8.64e-13	1.77e-11	12.0633	down_regulated	NADH dehydrogenase
BA_5173	-1.63602	5.03203	0.00243343	0.00691379	2.61378	down_regulated	NADH dehydrogenase
BA_5313	-0.750246	8.32555	0.0905707	0.15045	1.04301	no_significant	NADH dehydrogenase
BA_3089	-1.27897	2.60665	0.0189262	0.0402851	1.72294	no_significant	NAD-dependent protein deacetylase
BA_0579	-1.49858	-1.46755	0.292047	0.389829	0.534547	no_significant	NAD-dependent malic enzyme
BA_1801	-0.53397	1.15296	0.387324	0.493065	0.411925	no_significant	NAD-dependent malic enzyme
BA_3145	0.43432	-0.135231	0.586	0.678611	0.232103	no_significant	NAD-dependent malic enzyme
BA_4848	-1.15495	3.84282	0.0142047	0.0313952	1.84757	no_significant	NAD-dependent malic enzyme
BA_5408	-1.57542	-1.07288	0.160635	0.238601	0.79416	no_significant	NAD(P)H-dependent FMN-containing oxidoreductase
BA_3435	-1.54635	-0.229944	0.0984061	0.161049	1.00698	no_significant	NAD(P)H quinone oxidoreductase
BA_3438	-1.00481	2.66978	0.0833529	0.140401	1.07908	no_significant	NAD(P)H quinone oxidoreductase
BA_3358	0.208793	0.825387	0.790598	0.85813	0.102044	no_significant	NAD(P)H oxidoreductase
BA_5191	-1.87211	-1.84552	0.278229	0.374713	0.555598	no_significant	NAD(P)H oxidoreductase
BA_0766	1.80402	3.43257	0.000425088	0.00150293	3.37152	up_regulated	NAD(P)H nitroreductase
BA_3040	-2.01175	0.201853	0.00463557	0.0120427	2.3339	no_significant	NAD(P)H nitroreductase
BA_3380	0.310081	0.0641351	0.769223	0.842108	0.113948	no_significant	NAD(P)H nitroreductase
BA_4264	1.30488	2.03866	0.0191998	0.0407645	1.7167	no_significant	NAD(P)H nitroreductase
BA_1213	-1.18308	2.49555	0.0132034	0.0293985	1.87931	no_significant	NAD kinase
BA_4893	-0.616625	6.45841	0.156073	0.233277	0.806672	no_significant	NAD kinase
BA_0706	0.778485	1.68001	0.120461	0.189263	0.919154	no_significant	N-acyl-L-amino acid amidohydrolase
BA_3514	0.906741	0.475407	0.11685	0.184141	0.93237	no_significant	N-acyl homoserine lactonase
BA_2152	-0.650957	6.7139	0.246022	0.33882	0.609027	no_significant	N-acetyltransferase
BA_2717	1.74307	1.05639	0.00841085	0.0199978	2.07516	no_significant	N-acetyltransferase
BA_3010	0.243969	-1.01045	0.84609	0.899331	0.0725836	no_significant	N-acetyltransferase
BA_4060	0.706953	8.1373	0.0892177	0.148673	1.04955	no_significant	N-acetyltransferase
BA_0872	-1.22864	-2.14299	0.60759	0.696898	0.216389	no_significant	N-acetylmuramoyl-L-alanine amidase
BA_2446	-4.22618	0.945711	2.72e-08	2.37e-07	7.56585	down_regulated	N-acetylmuramoyl-L-alanine amidase
BA_3767	0.743874	-1.91316	0.69502	0.776428	0.158003	no_significant	N-acetylmuramoyl-L-alanine amidase
BA_4073	0.443293	1.43546	0.516133	0.617071	0.287238	no_significant	N-acetylmuramoyl-L-alanine amidase
BA_0822	-0.683425	-0.179061	0.560405	0.65693	0.251498	no_significant	N-acetylmuramic acid 6-phosphate etherase
BA_4225	1.39027	6.59645	0.00131064	0.00402671	2.88252	up_regulated	N-acetyl-LL-diaminopimelate aminotransferase
BA_4274	-1.3394	4.06269	0.00472092	0.012217	2.32597	no_significant	N-acetylglucosamine-6-phosphate deacetylase
BA_4193	-0.884186	2.02745	0.145055	0.220254	0.838466	no_significant	N-acetyldiaminopimelate deacetylase
BA_0785	0.487184	3.95934	0.352766	0.454157	0.452514	no_significant	Na+/phosphate symporter
BA_1639	3.84692	4.39595	1.67e-13	3.78e-12	12.7768	up_regulated	Na(+)/H(+)-K(+) antiporter
BA_0341	0.865071	3.46525	0.10263	0.166794	0.988725	no_significant	Na(+)/H(+) antiporter NhaC
BA_4345	2.89568	5.74963	9.4e-10	1.06e-08	9.02674	up_regulated	Na(+)/H(+) antiporter NhaC
BA_0699	1.72243	2.2587	0.000250844	0.000950497	3.6006	up_regulated	Na(+)/H(+) antiporter
BA_0819	-7.92151	0.0399933	1e-06	6.58e-06	5.99792	down_regulated	Na(+)/H(+) antiporter
BA_1452	3.27085	0.739594	1.49e-06	9.32e-06	5.82697	up_regulated	Na(+)/H(+) antiporter
BA_0289	-2.62947	2.74514	1.8e-05	9.08e-05	4.74571	down_regulated	N5-carboxyaminoimidazole ribonucleotide synthase
BA_0288	-2.89521	0.672047	3.88e-05	0.000181837	4.4113	down_regulated	N5-carboxyaminoimidazole ribonucleotide mutase
BA_1252	-0.83211	1.07516	0.219041	0.307199	0.659474	no_significant	N-(5\'-phosphoribosyl)anthranilate isomerase
BA_4406	-2.20998	0.058388	0.0166104	0.0359565	1.77962	no_significant	N utilization substance protein B
BA_1384	-1.40276	3.7423	0.00440461	0.0115282	2.35609	no_significant	murein peptide carboxypeptidase
BA_3501	0.0816869	3.48105	0.862482	0.911686	0.0642498	no_significant	muramidase
BA_3620	-1.65496	2.45541	0.00234728	0.0067024	2.62944	down_regulated	multiple resistance/pH adaptation protein
BA_0147	1.33165	4.51325	0.00317362	0.00867895	2.49845	up_regulated	multiple drug resistance/pH adaptation protein
BA_4216	0.0577043	1.74516	0.893966	0.933008	0.048679	no_significant	multidrug resistance transporter
BA_0328	6.22262	3.94915	3.15e-08	2.71e-07	7.50135	up_regulated	multidrug resistance protein
BA_0835	1.31688	1.12096	0.0206343	0.0436003	1.68541	no_significant	multidrug resistance protein
BA_1402	-1.47914	0.299842	0.0682382	0.119376	1.16597	no_significant	multidrug resistance protein
BA_3296	0.246334	1.62105	0.649719	0.737759	0.187274	no_significant	multidrug resistance protein
BA_4435	-1.92897	0.241225	0.0258956	0.052975	1.58677	no_significant	multidrug resistance protein
BA_4436	0.64336	2.72037	0.195123	0.279012	0.709692	no_significant	multidrug resistance protein
BA_5620	2.58998	-0.0924241	0.00128034	0.00394513	2.89267	up_regulated	multidrug resistance protein
BA_1642	1.06458	1.06386	0.146836	0.222236	0.833167	no_significant	multidrug export protein
BA_0852	-0.294311	4.04257	0.562795	0.65918	0.24965	no_significant	multidrug ABC transporter permease/ATP-binding protein
BA_3740	2.08586	1.02758	0.00245717	0.00695951	2.60956	up_regulated	multidrug ABC transporter permease/ATP-binding protein
BA_3741	-0.875968	0.0797118	0.181477	0.263113	0.741179	no_significant	multidrug ABC transporter permease/ATP-binding protein
BA_0254	-1.00011	6.03655	0.0179542	0.0384891	1.74583	no_significant	mRNA interferase EndoA
BA_5520	-2.66847	7.43458	1.89e-08	1.72e-07	7.72353	down_regulated	MreB/Mrl family cell shape determining protein
BA_3039	1.51505	0.917977	0.0285655	0.057404	1.54416	no_significant	monooxygenase
BA_3218	-2.40584	-0.974334	0.0247761	0.0510075	1.60597	no_significant	monooxygenase
BA_2134	-2.51241	-0.0131174	0.00715506	0.017462	2.14539	no_significant	molybdopterin-synthase adenylyltransferase
BA_3624	-1.8385	-0.31714	0.0320888	0.0632452	1.49365	no_significant	molybdopterin-synthase adenylyltransferase
BA_4976	-1.76772	0.180396	0.0105053	0.0241978	1.97859	no_significant	molybdopterin-synthase adenylyltransferase
BA_4973	0.245322	-0.873632	0.841962	0.89653	0.0747075	no_significant	molybdopterin-guanine dinucleotide biosynthesis adapter protein
BA_4972	0.615906	-0.204216	0.502585	0.603963	0.298791	no_significant	molybdopterin synthase catalytic subunit
BA_2135	-0.484635	0.28302	0.656602	0.743383	0.182698	no_significant	molybdopterin molybdenumtransferase
BA_3623	-0.535222	1.44827	0.365805	0.468935	0.43675	no_significant	molybdopterin molybdenumtransferase
BA_4974	-1.69933	1.16803	0.0119344	0.0270453	1.9232	no_significant	molybdopterin molybdenumtransferase
BA_3622	-3.4069	-0.868227	0.0146929	0.0322876	1.83289	no_significant	molybdopterin converting factor subunit 2
BA_3621	-4.8414	-2.12523	0.125377	0.195455	0.901781	no_significant	molybdopterin converting factor subunit 1
BA_5013	-2.69682	1.61953	6.81e-05	0.000300735	4.16659	down_regulated	molybdenum cofactor guanylyltransferase
BA_5014	-0.909802	-0.144584	0.252014	0.345042	0.598576	no_significant	molybdenum cofactor biosynthesis protein B
BA_0202	0.241651	4.26605	0.607113	0.696541	0.21673	no_significant	molybdenum ABC transporter permease
BA_0204	1.57258	5.54574	0.00211902	0.00614238	2.67387	up_regulated	modA; pseudogene
BA_0481	-2.0007	-0.727169	0.104421	0.169246	0.981213	no_significant	minor structural protein
BA_3771	-2.79888	-1.29342	0.0471822	0.0879647	1.32622	no_significant	minor structural protein
BA_4078	-3.76621	-0.606498	0.00351864	0.00949288	2.45363	down_regulated	minor structural protein
BA_4584	0.499465	6.62179	0.244578	0.337166	0.611583	no_significant	minor extracellular protease VpR
BA_5591	3.05643	2.15022	7.3e-09	7.21e-08	8.13679	up_regulated	minor cardiolipin synthase ClsB
BA_1796	-6.18667	-1.28862	0.00666809	0.0164529	2.176	no_significant	minor cardiolipin synthase
BA_2054	-5.54915	-1.70347	0.0341775	0.0667056	1.46626	no_significant	minor cardiolipin synthase
BA_0090	0.154286	1.32309	0.786679	0.855643	0.104202	no_significant	mini-ribonuclease III
BA_1949	-2.31162	-0.939687	0.0623736	0.11074	1.205	no_significant	microcin self-immunity protein MccF
BA_0244	1.55246	3.06614	0.00149413	0.00453413	2.82561	up_regulated	MFS-type transporter
BA_0393	1.18393	3.98548	0.0061984	0.0154629	2.20772	no_significant	MFS-type transporter
BA_0674	-0.365309	4.20494	0.429916	0.53403	0.366617	no_significant	MFS-type transporter
BA_0787	2.06137	2.48573	0.000149122	0.00059658	3.82646	up_regulated	MFS-type transporter
BA_0840	-1.69667	0.0292679	0.0442292	0.0834501	1.35429	no_significant	MFS-type transporter
BA_1014	-3.29593	-0.978027	0.0100521	0.0232687	1.99774	no_significant	MFS-type transporter
BA_1037	-0.00699752	1.65773	1	1	0	no_significant	MFS-type transporter
BA_1731	1.85302	2.35175	0.000145069	0.000582768	3.83843	up_regulated	MFS-type transporter
BA_1830	-0.739231	3.60702	0.13525	0.207917	0.868863	no_significant	MFS-type transporter
BA_1858	0.22337	3.61059	0.641589	0.729528	0.192743	no_significant	MFS-type transporter
BA_2004	0.870359	-0.00573771	0.238804	0.330507	0.621959	no_significant	MFS-type transporter
BA_2367	-0.932172	3.41135	0.0563554	0.101861	1.24906	no_significant	MFS-type transporter
BA_2393	2.45356	1.63811	2.65e-05	0.000128185	4.5766	up_regulated	MFS-type transporter
BA_2480	-0.734481	3.27344	0.10014	0.163377	0.999394	no_significant	MFS-type transporter
BA_2680	0.868827	0.419205	0.331127	0.43025	0.480005	no_significant	MFS-type transporter
BA_2882	-1.28946	-0.570743	0.181865	0.263586	0.74025	no_significant	MFS-type transporter
BA_3223	-1.58252	0.401248	0.031338	0.0620856	1.50393	no_significant	MFS-type transporter
BA_3302	0.750532	-0.0468972	0.247744	0.340639	0.605996	no_significant	MFS-type transporter
BA_3342	1.62322	3.76425	0.00304601	0.00838449	2.51627	up_regulated	MFS-type transporter
BA_3345	3.97131	3.39091	2.01e-11	3.07e-10	10.6973	up_regulated	MFS-type transporter
BA_3447	1.71425	2.85172	0.00019109	0.000744877	3.71876	up_regulated	MFS-type transporter
BA_4812	-1.46174	0.971485	0.0335902	0.0658037	1.47379	no_significant	MFS-type transporter
BA_4992	1.26786	0.992343	0.0116492	0.026499	1.9337	no_significant	MFS-type transporter
BA_5309	0.489589	0.0108297	0.466317	0.569988	0.331319	no_significant	MFS-type transporter
BA_5693	0.534951	-0.428013	0.580195	0.673558	0.236426	no_significant	MFS-type transporter
BA_0995	1.67268	4.30884	0.000228227	0.000874246	3.64163	up_regulated	methyltransferase
BA_1462	-0.835523	5.4613	0.164398	0.243128	0.784104	no_significant	methyltransferase
BA_2890	2.35434	0.957699	8.56e-05	0.000367176	4.06733	up_regulated	methyltransferase
BA_4555	0.256165	2.93465	0.564253	0.660704	0.248526	no_significant	methyltransferase
BA_4603	3.14167	7.43829	1.84e-12	3.48e-11	11.7342	up_regulated	methyltransferase
BA_4257	-0.526309	5.30575	0.224157	0.313143	0.649448	no_significant	methylthioribulose-1-phosphate dehydratase
BA_0347	-1.39701	4.44725	0.0330912	0.0649167	1.48029	no_significant	methylthioribose-1-phosphate isomerase
BA_4251	1.26025	1.3423	0.0155387	0.0339159	1.80858	no_significant	methylthioribose-1-phosphate isomerase
BA_4252	1.3321	0.90515	0.0595842	0.106688	1.22487	no_significant	methylthioribose kinase
BA_1910	-5.65222	-1.64467	0.0144562	0.0318674	1.83994	no_significant	methylmalonyl-CoA epimerase
BA_2354	1.39243	10.4405	0.0041048	0.0108311	2.38671	no_significant	methylmalonate semialdehyde dehydrogenase
BA_2513	-2.74891	1.57232	3.2e-05	0.00015254	4.49502	down_regulated	methylmalonate semialdehyde dehydrogenase
BA_2350	0.811958	8.29113	0.0471035	0.0878569	1.32695	no_significant	methylisocitrate lyase
BA_1556	-0.799549	1.79236	0.101391	0.165099	0.994	no_significant	methylglyoxal synthase
BA_3970	-0.582359	2.9009	0.190608	0.273711	0.719858	no_significant	methylenetetrahydrofolate--tRNA-(uracil-5-)-methyltransferase TrmFO
BA_2039	-0.3206	-0.328625	0.699715	0.780844	0.155079	no_significant	methylated-DNA--protein-cysteine methyltransferase
BA_3870	0.963478	0.323337	0.165056	0.243728	0.782369	no_significant	methylated-DNA--protein-cysteine methyltransferase
BA_0558	1.04263	-0.782548	0.302846	0.401314	0.518778	no_significant	methyl-accepting chemotaxis protein
BA_0575	-2.25252	-0.970343	0.118252	0.186001	0.927193	no_significant	methyl-accepting chemotaxis protein
BA_0684	2.9374	1.20946	0.000742049	0.00245752	3.12957	up_regulated	methyl-accepting chemotaxis protein
BA_2009	0.870978	-0.33255	0.369228	0.472891	0.432705	no_significant	methyl-accepting chemotaxis protein
BA_3291	0.992177	-1.17623	0.416421	0.521115	0.380467	no_significant	methyl-accepting chemotaxis protein
BA_5280	0.0784969	2.3891	0.884736	0.927056	0.0531862	no_significant	methyl-accepting chemotaxis protein
BA_5317	0.753251	-0.872937	0.511826	0.612967	0.290878	no_significant	methyl-accepting chemotaxis protein
BA_4004	-0.886988	0.536607	0.171093	0.251176	0.766767	no_significant	methionyl-tRNA formyltransferase
BA_0036	-0.934155	5.13164	0.0264742	0.0538966	1.57718	no_significant	methionine--tRNA ligase
BA_5278	-0.747835	2.21561	0.102764	0.166882	0.988159	no_significant	methionine--tRNA ligase
BA_4478	-0.303963	4.81972	0.484993	0.587693	0.314264	no_significant	methionine synthase
BA_4906	0.223173	1.37366	0.727719	0.806106	0.138037	no_significant	methionine gamma-lyase
BA_0132	-4.44565	7.16489	9.39e-14	2.21e-12	13.0274	down_regulated	methionine aminopeptidase
BA_1590	3.2875	-0.651938	0.000786821	0.00258683	3.10412	up_regulated	methionine aminopeptidase
BA_5601	0.258982	4.22015	0.589475	0.68138	0.229535	no_significant	methionine aminopeptidase
BA_0175	0.984533	2.91817	0.130246	0.201848	0.885236	no_significant	methionine ABC transporter substrate-binding protein
BA_5219	0.895461	-0.160595	0.258051	0.352162	0.588295	no_significant	methionine ABC transporter substrate-binding protein
BA_5220	2.3885	6.91575	1.61e-05	8.27e-05	4.79186	up_regulated	methionine ABC transporter substrate-binding protein
BA_0173	2.01253	1.60812	4.62e-05	0.00021256	4.33544	up_regulated	methionine ABC transporter permease
BA_5221	2.35477	5.64675	8.94e-08	7.1e-07	7.04857	up_regulated	methionine ABC transporter permease
BA_0174	0.156676	2.10466	0.739999	0.817556	0.130769	no_significant	methionine ABC transporter ATP-binding protein
BA_0312	2.61723	-0.242081	0.014068	0.0311258	1.85177	no_significant	methionine ABC transporter ATP-binding protein
BA_5222	-0.0420861	2.64169	0.929175	0.956463	0.0319025	no_significant	methionine ABC transporter ATP-binding protein
BA_2042	-0.307108	0.0502775	0.709455	0.789736	0.149075	no_significant	metallothiol transferase
BA_2183	0.701484	8.69088	0.127976	0.198717	0.892872	no_significant	metalloprotease
BA_2730	-1.99491	-1.26009	0.08216	0.13867	1.08534	no_significant	metalloprotease
BA_3923	-0.994148	4.31545	0.0872951	0.145873	1.05901	no_significant	metalloprotease
BA_4205	0.760141	-0.117352	0.339905	0.439841	0.468643	no_significant	metallophosphoesterase
BA_4713	0.293521	2.08176	0.550352	0.647491	0.25936	no_significant	metallophosphoesterase
BA_1088	-1.64269	3.05897	0.000589027	0.00200603	3.22986	down_regulated	metallohydrolase
BA_2297	-0.923638	5.79708	0.120669	0.18952	0.918403	no_significant	metallohydrolase
BA_3118	-0.593827	6.47965	0.378953	0.484314	0.421414	no_significant	metallohydrolase
BA_4485	1.53111	-0.870008	0.161522	0.239718	0.791769	no_significant	metallohydrolase
BA_1737	1.71316	-0.250354	0.00838137	0.0199389	2.07669	no_significant	metallo-beta-lactamase family protein
BA_5711	-1.23604	2.05855	0.0261111	0.0533382	1.58317	no_significant	metallo-beta-lactamase family protein
BA_2700	2.28529	-1.29463	0.0539847	0.0982942	1.26773	no_significant	metal-dependent hydrolase
BA_4860	0.955098	2.04072	0.0500696	0.0924057	1.30043	no_significant	metal-dependent hydrolase
BA_4306	0.595364	2.57011	0.171732	0.251938	0.765148	no_significant	metal ion transporter
BA_1760	4.88102	-0.472235	3.94e-07	2.78e-06	6.40493	up_regulated	metal chaperone
BA_0931	-0.6417	0.548459	0.299412	0.397892	0.523731	no_significant	MerR family transcriptional regulator
BA_2576	3.71809	3.03444	1.09e-11	1.77e-10	10.9645	up_regulated	MerR family transcriptional regulator
BA_5407	1.83752	1.66483	0.000418548	0.00148433	3.37826	up_regulated	MerR family transcriptional regulator
BA_5621	0.557669	-1.19388	0.64613	0.734096	0.18968	no_significant	MerR family transcriptional regulator
BA_1544	0.411337	9.04431	0.474497	0.576968	0.323767	no_significant	menaquinol-cytochrome c reductase iron-sulfur subunit
BA_1546	1.99851	10.4021	3.24e-06	1.92e-05	5.48907	up_regulated	menaquinol-cytochrome c reductase cytochrome b/c subunit
BA_1545	-0.378396	8.81595	0.527518	0.627117	0.277763	no_significant	menaquinol-cytochrome c reductase cytochrome b subunit
BA_4841	2.5549	4.04315	7.96e-07	5.31e-06	6.09905	up_regulated	membrane protein YtvI
BA_1979	1.52559	1.195	0.012335	0.0278186	1.90886	no_significant	membrane protein SapB
BA_5127	-3.25381	-0.235308	0.0027628	0.00770254	2.55865	down_regulated	membrane protein SapB
BA_5048	1.40251	0.0422853	0.0553036	0.100218	1.25725	no_significant	membrane protein insertion efficiency factor
BA_5263	-0.822612	4.62218	0.0548548	0.0997058	1.26079	no_significant	membrane protein insertase YidC
BA_5736	-0.576573	3.68708	0.196998	0.280968	0.705538	no_significant	membrane protein insertase YidC
BA_0218	1.23638	-0.311139	0.139977	0.213976	0.853945	no_significant	membrane protein
BA_0402	3.04579	6.85244	4.44e-11	6.41e-10	10.3527	up_regulated	membrane protein
BA_0810	0.867097	-0.729032	0.407552	0.512455	0.389817	no_significant	membrane protein
BA_1302	-0.147932	2.35321	0.772905	0.845252	0.111874	no_significant	membrane protein
BA_1322	2.67202	4.2821	1.62e-08	1.5e-07	7.79118	up_regulated	membrane protein
BA_2048	0.909785	2.63484	0.104102	0.16886	0.982539	no_significant	membrane protein
BA_2407	0.0996671	3.88154	0.820699	0.880352	0.085816	no_significant	membrane protein
BA_2842	-1.80997	-1.23931	0.230394	0.320555	0.637529	no_significant	membrane protein
BA_3774	-0.310203	0.379438	0.755188	0.829977	0.121945	no_significant	membrane protein
BA_4842	2.50381	-0.269834	0.0184324	0.0393936	1.73442	no_significant	membrane protein
BA_1551	1.88304	5.95573	1.64e-05	8.38e-05	4.78522	up_regulated	membrane protease
BA_0265	0.661822	3.15834	0.127373	0.197906	0.894921	no_significant	membrane peptidase
BA_2263	0.364073	1.21585	0.486079	0.588669	0.313293	no_significant	mechanosensitive ion channel family protein
BA_5726	-0.06877	1.67659	0.910259	0.943922	0.0408352	no_significant	mechanosensitive ion channel family protein
BA_1196	-0.619082	0.765409	0.470789	0.573786	0.327174	no_significant	MATE efflux family protein
BA_0318	0.670559	2.10032	0.168583	0.248009	0.773187	no_significant	MarR family transcriptional regulator
BA_1035	0.945073	0.224427	0.116641	0.183948	0.933151	no_significant	MarR family transcriptional regulator
BA_2487	-0.608059	2.85824	0.421967	0.526489	0.374721	no_significant	MarR family transcriptional regulator
BA_3041	-4.7553	-2.17044	0.190352	0.273529	0.720443	no_significant	MarR family transcriptional regulator
BA_3220	-0.888064	-1.21523	0.395556	0.500513	0.402793	no_significant	MarR family transcriptional regulator
BA_3344	-0.216531	0.315782	0.816696	0.878748	0.0879395	no_significant	MarR family transcriptional regulator
BA_4303	2.67878	3.93264	5.37e-06	3.02e-05	5.27041	up_regulated	MarR family transcriptional regulator
BA_4348	-0.572297	7.24175	0.172919	0.25306	0.762158	no_significant	MarR family transcriptional regulator
BA_4699	-1.64062	-1.97809	0.399813	0.504534	0.398143	no_significant	MarR family transcriptional regulator
BA_5284	1.01357	-1.40927	0.316401	0.415426	0.499762	no_significant	MarR family transcriptional regulator
BA_2826	0.298946	7.74554	0.56999	0.665215	0.244133	no_significant	manganese-dependent inorganic pyrophosphatase
BA_5567	-1.72482	-0.13928	0.0416262	0.079275	1.38063	no_significant	manganese efflux pump MntP
BA_3189	-1.07099	2.02501	0.0304494	0.0606393	1.51642	no_significant	manganese ABC transporter substrate-binding protein
BA_3190	-2.27072	1.39405	0.000587422	0.00200381	3.23105	down_regulated	manganese ABC transporter permease
BA_3191	-1.43229	0.506792	0.0254877	0.0522932	1.59367	no_significant	manganese ABC transporter ATP-binding protein
BA_4226	1.81521	1.78318	0.000141847	0.000572563	3.84818	up_regulated	maltose operon transcriptional repressor
BA_3402	-1.05073	-1.68828	0.551344	0.648477	0.258577	no_significant	maltose O-acetyltransferase
BA_4229	0.36228	3.62992	0.480475	0.582889	0.318329	no_significant	maltosaccharide ABC transporter substrate-binding protein
BA_4227	2.61406	3.23059	2.1e-08	1.91e-07	7.67702	up_regulated	maltosaccharide ABC transporter permease
BA_4228	-1.69121	3.03885	0.00493519	0.0126802	2.3067	no_significant	maltosaccharide ABC transporter permease
BA_3990	-3.24171	4.76513	1.02e-05	5.45e-05	4.99345	down_regulated	malonyl CoA-acyl carrier protein transacylase
BA_4337	-0.909601	2.9072	0.0456772	0.0856143	1.3403	no_significant	malonyl
BA_1766	-3.50238	-0.869566	0.00375758	0.0100473	2.42509	no_significant	malate-2H(+)/Na(+)-lactate antiporter
BA_2974	-1.79411	6.02538	0.000138227	0.000561724	3.85941	down_regulated	malate:quinone oxidoreductase
BA_1131	5.59624	5.28055	2.74e-20	1.39e-18	19.5621	up_regulated	malate synthase A
BA_4837	0.34056	8.24007	0.413667	0.518131	0.383349	no_significant	malate dehydrogenase
BA_0474	-2.17539	-1.70599	0.215481	0.303014	0.66659	no_significant	major tail protein
BA_3778	-2.0302	-1.76041	0.260619	0.35463	0.583994	no_significant	major tail protein
BA_0468	0.87166	-1.11274	0.526771	0.626584	0.278378	no_significant	major capsid protein
BA_4091	-2.31526	-1.67743	0.12166	0.190719	0.914854	no_significant	major capsid protein
BA_5360	0.990994	-0.4617	0.207664	0.293591	0.682639	no_significant	major capsid protein
BA_1589	-2.25338	1.94595	1.25e-05	6.54e-05	4.90383	down_regulated	macrolide 2-phosphotransferase
BA_0605	-5.42611	-1.79139	0.0554965	0.100525	1.25573	no_significant	LytR family transcription antiterminator
BA_1973	0.801352	2.77621	0.179575	0.260883	0.745753	no_significant	LytR family transcription antiterminator
BA_1733	0.871343	-0.996558	0.357353	0.459642	0.446902	no_significant	LysR family transcriptional regulator
BA_2435	1.74913	-0.827222	0.0668974	0.117532	1.17459	no_significant	LysR family transcriptional regulator
BA_2439	0.572724	-1.23871	0.77517	0.846848	0.110603	no_significant	LysR family transcriptional regulator
BA_3170	1.47752	-0.917836	0.112262	0.179193	0.949767	no_significant	LysR family transcriptional regulator
BA_5406	-2.19964	1.02455	0.0157864	0.0343852	1.80172	no_significant	LysR family transcriptional regulator
BA_5454	0.00625225	-0.416466	1	1	0	no_significant	LysR family transcriptional regulator
BA_1860	2.15251	2.45775	0.00045586	0.00159646	3.34117	up_regulated	lysophospholipase
BA_0076	0.235056	5.19303	0.601777	0.691585	0.220565	no_significant	lysine--tRNA ligase
BA_3436	-1.85975	0.907717	0.00456072	0.0118903	2.34097	no_significant	luciferase-type oxidoreductase
BA_0621	-1.59046	6.57949	0.00037875	0.00136272	3.42165	down_regulated	L-threonine dehydrogenase
BA_1854	-1.76701	6.22328	0.000197624	0.000768214	3.70416	down_regulated	L-threonine dehydratase IlvA
BA_2469	-1.19254	2.55354	0.0423026	0.0802909	1.37363	no_significant	L-threonine dehydratase
BA_3308	-0.076243	1.53653	0.875671	0.920768	0.0576589	no_significant	L-serine dehydratase subunit beta
BA_4361	-1.64013	1.58605	0.0689557	0.120293	1.16143	no_significant	L-serine dehydratase subunit beta
BA_3307	-1.62062	1.43826	0.00622862	0.0155199	2.20561	no_significant	L-serine dehydratase subunit alpha
BA_4360	-0.366029	3.88712	0.403782	0.508627	0.393853	no_significant	L-serine dehydratase subunit alpha
BA_0688	3.2681	1.59468	3.65e-06	2.14e-05	5.43738	up_regulated	LPXTG family transpeptidase sortase A
BA_0407	2.31535	5.44309	1.47e-07	1.1e-06	6.8324	up_regulated	low molecular weight protein-tyrosine-phosphatase
BA_0876	-0.0806213	5.43944	0.853374	0.904636	0.0688605	no_significant	long-chain-fatty-acid--CoA ligase
BA_1091	0.586105	7.19567	0.154991	0.23199	0.809694	no_significant	long-chain-fatty-acid--CoA ligase
BA_3690	2.05657	5.75183	4.03e-06	2.34e-05	5.39452	up_regulated	long-chain-fatty-acid--CoA ligase
BA_4763	-0.976167	7.2227	0.0371267	0.0718946	1.43031	no_significant	long-chain-fatty-acid--CoA ligase
BA_4702	-1.27858	3.2343	0.00608403	0.0152227	2.21581	no_significant	Lon protease
BA_4703	-2.99626	2.86364	9.08e-08	7.19e-07	7.04183	down_regulated	Lon protease
BA_4341	0.732624	3.07089	0.103062	0.167238	0.9869	no_significant	L-lysine--8-amino-7-oxononanoate transaminase
BA_2300	1.34403	10.5051	0.00758496	0.0183136	2.12005	no_significant	L-lysine 2,3-aminomutase
BA_0610	1.41052	8.49786	0.00186205	0.00551532	2.73001	up_regulated	L-lactate permease
BA_1256	3.40125	2.15015	9.45e-09	9.16e-08	8.02442	up_regulated	L-lactate permease
BA_5464	1.02202	2.71019	0.0296629	0.0592977	1.52779	no_significant	L-lactate permease
BA_1923	-3.17317	3.6805	1.78e-10	2.36e-09	9.7505	down_regulated	L-lactate dehydrogenase
BA_5125	0.341768	13.3194	0.435317	0.538671	0.361194	no_significant	L-lactate dehydrogenase
BA_5240	1.31828	6.5919	0.011727	0.0266518	1.93081	no_significant	L-lactate dehydrogenase
BA_5205	-2.2483	7.00339	9.03e-06	4.9e-05	5.0441	down_regulated	lipoyl synthase
BA_1436	0.709908	4.74809	0.0997987	0.162884	1.00088	no_significant	lipoteichoic acid synthase
BA_2947	1.18593	5.22675	0.0075588	0.0182714	2.12155	no_significant	lipoteichoic acid synthase
BA_3895	3.4388	6.01802	8.59e-12	1.41e-10	11.066	up_regulated	lipoteichoic acid synthase
BA_5470	-0.00398113	8.53509	0.993208	1	0.00295984	no_significant	lipoteichoic acid synthase
BA_4032	-0.91045	-1.50427	0.464793	0.56829	0.332741	no_significant	lipoprotein signal peptidase
BA_0171	-1.21512	0.923053	0.0315577	0.0623743	1.5009	no_significant	lipoprotein
BA_0177	1.89733	1.47413	0.00272607	0.00761849	2.56446	up_regulated	lipoprotein
BA_0183	2.76488	1.12763	5.65e-07	3.87e-06	6.24764	up_regulated	lipoprotein
BA_0190	-8.13726	4.56299	2.07e-28	3.23e-26	27.6831	down_regulated	lipoprotein
BA_0264	2.60551	1.9777	2.71e-05	0.000130607	4.56739	up_regulated	lipoprotein
BA_0307	-1.23111	3.21822	0.00864212	0.0204436	2.06338	no_significant	lipoprotein
BA_0529	1.84308	3.22123	0.000130039	0.000532047	3.88593	up_regulated	lipoprotein
BA_0563	5.14017	4.63876	1.44e-16	4.93e-15	15.8409	up_regulated	lipoprotein
BA_0580	-3.93782	-0.481822	0.00130828	0.00402237	2.8833	down_regulated	lipoprotein
BA_0602	-2.68344	0.0178774	0.00154705	0.00467784	2.8105	down_regulated	lipoprotein
BA_0760	0.0784335	5.19795	0.8599	0.909642	0.0655522	no_significant	lipoprotein
BA_0837	-1.41647	-0.325042	0.142546	0.216991	0.846046	no_significant	lipoprotein
BA_0864	2.2907	1.26857	4.24e-05	0.000197219	4.37227	up_regulated	lipoprotein
BA_0936	-0.712859	1.0071	0.249005	0.341771	0.603793	no_significant	lipoprotein
BA_0985	0.819403	1.67174	0.24164	0.333663	0.616832	no_significant	lipoprotein
BA_1061	3.61093	-0.251149	0.000106649	0.000446333	3.97204	up_regulated	lipoprotein
BA_1090	-2.03721	0.0548112	0.0206262	0.0436003	1.68558	no_significant	lipoprotein
BA_1244	3.61469	4.85437	1.04e-08	9.88e-08	7.98363	up_regulated	lipoprotein
BA_1311	-1.24364	-0.414326	0.25057	0.343289	0.601071	no_significant	lipoprotein
BA_1601	-0.497525	-1.65007	0.815333	0.87818	0.0886649	no_significant	lipoprotein
BA_1948	-0.672499	2.81864	0.168212	0.247551	0.774143	no_significant	lipoprotein
BA_2258	1.61109	4.84878	0.00288549	0.0080108	2.53978	up_regulated	lipoprotein
BA_2521	4.97485	7.7031	2.88e-10	3.68e-09	9.54056	up_regulated	lipoprotein
BA_2527	3.88123	7.01216	9.4e-10	1.06e-08	9.02693	up_regulated	lipoprotein
BA_2584	0.586135	-0.660217	0.488396	0.590625	0.311228	no_significant	lipoprotein
BA_2745	-0.0977198	2.37714	0.845763	0.899212	0.0727511	no_significant	lipoprotein
BA_2746	-3.80661	2.90513	5.39e-08	4.45e-07	7.26838	down_regulated	lipoprotein
BA_2766	3.86438	0.595135	1.16e-06	7.52e-06	5.93634	up_regulated	lipoprotein
BA_2883	1.91463	3.79257	0.000216113	0.000831628	3.66532	up_regulated	lipoprotein
BA_2931	4.75528	2.59588	2.07e-13	4.55e-12	12.6849	up_regulated	lipoprotein
BA_2933	-1.46714	2.38319	0.0185823	0.0396334	1.7309	no_significant	lipoprotein
BA_2942	-1.66803	-0.640106	0.144001	0.218957	0.841634	no_significant	lipoprotein
BA_3005	2.83618	-0.397727	0.0017201	0.00513103	2.76445	up_regulated	lipoprotein
BA_3228	2.96784	-0.349993	0.0101914	0.0235522	1.99177	no_significant	lipoprotein
BA_3234	1.09828	-1.07544	0.393583	0.499031	0.404963	no_significant	lipoprotein
BA_3366	-0.0488006	0.887527	0.977293	0.995249	0.00997534	no_significant	lipoprotein
BA_3383	0.880588	1.17945	0.14629	0.221649	0.834784	no_significant	lipoprotein
BA_3418	0.558154	-1.40202	0.724273	0.803135	0.140098	no_significant	lipoprotein
BA_3588	1.27432	-0.312645	0.188317	0.271005	0.725111	no_significant	lipoprotein
BA_3927	-0.870794	6.21817	0.0409515	0.0781852	1.38773	no_significant	lipoprotein
BA_4236	1.19997	-1.34917	0.329794	0.429181	0.481757	no_significant	lipoprotein
BA_4310	2.17332	-0.133281	0.0131708	0.0293569	1.88039	no_significant	lipoprotein
BA_4862	3.24544	2.20041	4.98e-08	4.13e-07	7.30286	up_regulated	lipoprotein
BA_4914	1.03325	-0.21802	0.249056	0.341771	0.603704	no_significant	lipoprotein
BA_4930	2.3193	1.56361	2.61e-05	0.00012685	4.58256	up_regulated	lipoprotein
BA_4934	2.34751	1.85178	1.87e-05	9.38e-05	4.72857	up_regulated	lipoprotein
BA_5058	-2.04711	3.66752	0.00456275	0.0118903	2.34077	no_significant	lipoprotein
BA_5062	0.0752668	0.462545	0.947163	0.96858	0.0235752	no_significant	lipoprotein
BA_5199	-8.2573	3.25877	3.82e-23	3.03e-21	22.4178	down_regulated	lipoprotein
BA_5237	0.637089	0.571563	0.283244	0.379645	0.547839	no_significant	lipoprotein
BA_5326	1.22472	1.34213	0.0701946	0.12205	1.1537	no_significant	lipoprotein
BA_5374	-2.55228	0.632132	0.0130008	0.0290703	1.88603	no_significant	lipoprotein
BA_5398	-0.1728	-1.69858	0.892044	0.931796	0.0496136	no_significant	lipoprotein
BA_5501	-3.20934	-0.333573	0.00423322	0.011135	2.37333	no_significant	lipoprotein
BA_5559	-1.77237	3.83785	0.000144519	0.000581673	3.84007	down_regulated	lipoprotein
BA_5634	1.82399	-1.72544	0.164349	0.243128	0.784232	no_significant	lipoprotein
BA_1089	-1.79701	4.2225	9.33e-05	0.000396549	4.02994	down_regulated	lipoate-protein ligase A
BA_1301	-1.91416	-1.82012	0.272911	0.368732	0.563979	no_significant	lipid phosphate phosphatase
BA_5075	0.583206	1.03028	0.313738	0.413015	0.503432	no_significant	lipid kinase BmrU
BA_4158	3.17582	4.02279	1.38e-11	2.21e-10	10.8586	up_regulated	lipid II flippase FtsW
BA_2501	1.14701	3.44151	0.0276954	0.0559227	1.55759	no_significant	lipase/acylhydrolase
BA_4347	-0.123758	3.59631	0.799197	0.865008	0.0973463	no_significant	lipase/acylhydrolase
BA_5651	-1.13124	-0.917929	0.397369	0.502505	0.400806	no_significant	lipase/acylhydrolase
BA_5117	-4.92928	1.10651	1.25e-08	1.18e-07	7.90317	down_regulated	lipase family protein
BA_2607	2.08708	6.10626	4.75e-06	2.71e-05	5.32353	up_regulated	lipase
BA_0944	-2.58172	-1.40548	0.153783	0.230756	0.813092	no_significant	lincomycin resistance protein LmrB
BA_1038	0.0282913	1.85101	0.949025	0.96996	0.0227223	no_significant	lincomycin resistance protein LmrB
BA_0790	0.572041	-1.05523	0.598967	0.689878	0.222597	no_significant	licABCH operon regulator
BA_3754	1.85865	6.17825	2.42e-05	0.000118795	4.61558	up_regulated	LexA repressor
BA_4991	-0.64129	6.01415	0.187637	0.270356	0.726681	no_significant	leucine--tRNA ligase
BA_4387	0.491851	7.2267	0.316917	0.415898	0.499054	no_significant	leucine dehydrogenase
BA_4469	4.24209	6.7668	1.84e-16	6.2e-15	15.7348	up_regulated	L-cystine uptake protein TcyP
BA_4554	-5.39943	5.04713	2.71e-23	2.24e-21	22.5662	down_regulated	late competence protein ComER
BA_4662	-0.727205	3.29799	0.10498	0.169759	0.978895	no_significant	L-aspartate oxidase
BA_1516	-1.43268	2.77981	0.00308886	0.00848025	2.5102	down_regulated	L-asparaginase
BA_3137	-0.943871	-0.555441	0.327613	0.426606	0.484639	no_significant	L-asparaginase
BA_4924	4.59275	2.7132	7.37e-13	1.54e-11	12.1324	up_regulated	large conductance mechanosensitive channel protein
BA_3899	0.210658	-0.591602	0.834743	0.891325	0.0784471	no_significant	lantibiotic biosynthesis sensor histidine kinase
BA_3900	0.350476	0.336213	0.554152	0.651233	0.256371	no_significant	lantibiotic biosynthesis DNA-binding response regulator
BA_1924	-0.634455	-0.222147	0.467886	0.571076	0.32986	no_significant	L-amino acid oxidase
BA_2018	-2.85534	-1.23983	0.0685882	0.119851	1.16375	no_significant	L-amino acid oxidase
BA_5206	-3.63013	3.57329	1.14e-10	1.54e-09	9.94496	down_regulated	L-Ala--D-Glu endopeptidase
BA_2850	1.57013	2.13715	0.000648147	0.00218263	3.18833	up_regulated	L-Ala-D/L-Glu epimerase
BA_1317	-0.24474	5.81581	0.612304	0.701538	0.213033	no_significant	lactate utilization protein C
BA_3268	1.03775	2.44303	0.0351093	0.0682392	1.45458	no_significant	lactate utilization protein C
BA_1316	-2.72935	6.09659	5.27e-06	2.97e-05	5.27807	down_regulated	lactate utilization protein B
BA_3269	1.56845	4.72967	0.0117291	0.0266518	1.93074	no_significant	lactate utilization protein B
BA_1315	-1.96118	3.27054	0.000331807	0.00121039	3.47911	down_regulated	lactate utilization protein A
BA_3270	1.81288	0.151341	0.123522	0.192919	0.908257	no_significant	lactate utilization protein A
BA_1086	2.24611	7.21968	4.08e-07	2.86e-06	6.38982	up_regulated	LacI family transcriptional regulator
BA_4372	-3.58452	2.25161	2.84e-07	2.06e-06	6.54692	down_regulated	L,D-transpeptidase
BA_0361	2.96437	5.96678	5.94e-08	4.87e-07	7.22605	up_regulated	kynurenine formamidase
BA_2752	-1.96949	2.71227	0.00046543	0.00162862	3.33215	down_regulated	kynurenine formamidase
BA_2753	-1.90772	1.68812	0.000212307	0.000818482	3.67304	down_regulated	kynureninase
BA_1333	-2.60857	0.775723	0.000134568	0.000549509	3.87106	down_regulated	Ktr system potassium uptake protein D
BA_4191	1.10594	-0.382888	0.134567	0.207094	0.871063	no_significant	Ktr system potassium uptake protein C
BA_1323	-7.28518	-0.468805	2.79e-05	0.000133896	4.55509	down_regulated	Ktr system potassium uptake protein B
BA_1409	2.03815	3.74472	3.52e-06	2.07e-05	5.45343	up_regulated	Ktr system potassium uptake protein B
BA_0149	3.35046	5.93639	1.73e-12	3.32e-11	11.7628	up_regulated	KinB-signaling pathway activation protein
BA_5141	-0.428032	2.43164	0.381239	0.486496	0.418802	no_significant	kinase-associated lipoprotein B
BA_3097	-1.74488	-1.92069	0.322592	0.421504	0.491347	no_significant	kinase A inhibitor
BA_1419	-0.467239	5.83849	0.407181	0.512284	0.390212	no_significant	ketol-acid reductoisomerase
BA_1852	-2.66062	6.13948	2.61e-05	0.00012685	4.58267	down_regulated	ketol-acid reductoisomerase
BA_3281	0.646261	-0.165078	0.454079	0.557623	0.342868	no_significant	kanosamine-6-phosphate phosphatase
BA_4994	0.966149	2.46452	0.036826	0.0714108	1.43385	no_significant	K(+)/H(+) antiporter subunit KhtT
BA_5287	-0.0267303	-1.70141	1	1	4.34e-16	no_significant	K(+)/H(+) antiporter subunit KhtT
BA_4993	1.3978	4.80947	0.00350934	0.00947996	2.45477	up_regulated	K(+)/H(+) antiporter
BA_3961	-1.66418	1.46984	0.00290945	0.00806668	2.53619	down_regulated	isoprenyl transferase
BA_1520	2.8649	5.29389	8.91e-10	1.01e-08	9.05007	up_regulated	isopentenyl-diphosphate delta-isomerase
BA_3469	-1.83185	-1.26513	0.17816	0.259288	0.749189	no_significant	isomerase
BA_2181	-1.22493	4.84357	0.00484804	0.0124715	2.31443	no_significant	isoleucine--tRNA ligase
BA_4034	-1.10809	6.36721	0.00957638	0.0223148	2.0188	no_significant	isoleucine--tRNA ligase
BA_1132	4.22496	6.42485	2.19e-10	2.88e-09	9.65866	up_regulated	isocitrate lyase
BA_4838	-1.10828	7.5209	0.0467324	0.0873196	1.33038	no_significant	isocitrate dehydrogenase
BA_2369	-4.16882	5.04678	1.17e-15	3.46e-14	14.9323	down_regulated	isochorismate synthase DhbC
BA_5112	-1.63596	0.382308	0.0682358	0.119376	1.16599	no_significant	isochorismate synthase
BA_0016	-0.728626	-1.58228	0.694251	0.775776	0.158483	no_significant	isochorismatase family protein
BA_0311	-0.459125	2.13635	0.324209	0.42296	0.489175	no_significant	isochorismatase family protein
BA_1382	-1.2996	-1.53137	0.431281	0.535252	0.365239	no_significant	isochorismatase family protein
BA_3167	-1.29869	4.73054	0.057957	0.104303	1.23689	no_significant	isochorismatase family protein
BA_2371	-2.60884	3.41659	1.06e-05	5.63e-05	4.97642	down_regulated	isochorismatase
BA_1010	-0.947784	3.34089	0.101569	0.165325	0.993239	no_significant	IS607 family element hypothetical protein
BA_3091	0.331407	-0.0134698	0.702872	0.783627	0.153124	no_significant	IS605 family transposase OrfB
BA_1782	4.5096	3.06558	7.41e-17	2.67e-15	16.1299	up_regulated	IS605 family transposase OrfA
BA_3092	2.89004	1.41088	3.29e-06	1.95e-05	5.48244	up_regulated	IS605 family transposase OrfA
BA_5458	3.98811	2.58388	1.48e-13	3.39e-12	12.8311	up_regulated	IS605 family transposase OrfA
BA_3745	-1.80405	1.17672	0.00392792	0.0104298	2.40584	no_significant	IS605 family transposase
BA_5397	-0.489686	2.03359	0.306546	0.40545	0.513505	no_significant	IS605 family transposase
BA_1484	-2.43127	8.17313	4.88e-06	2.77e-05	5.31151	down_regulated	IS200/IS605 family element hypothetical protein
BA_2147	-1.43118	-0.0269985	0.0549048	0.0997535	1.26039	no_significant	iron-sulfur cluster repair protein
BA_4652	-6.42751	-1.11172	0.00101041	0.00321467	2.9955	down_regulated	iron-binding protein
BA_0351	0.569561	3.05725	0.293372	0.390909	0.532582	no_significant	iron ABC transporter substrate-binding protein
BA_3531	-0.101691	-1.76416	1	1	0	no_significant	iron ABC transporter substrate-binding protein
BA_4597	-0.598352	0.258928	0.464697	0.56829	0.33283	no_significant	iron ABC transporter substrate-binding protein
BA_4766	2.38644	6.8783	0.000517262	0.00179062	3.28629	up_regulated	iron ABC transporter substrate-binding protein
BA_5330	0.604229	6.26361	0.269736	0.365146	0.569062	no_significant	iron ABC transporter substrate-binding protein
BA_5628	-8.04033	0.139791	4.59e-07	3.17e-06	6.33795	down_regulated	iron ABC transporter substrate-binding protein
BA_0349	0.829666	1.82176	0.202684	0.2881	0.693181	no_significant	iron ABC transporter permease
BA_0350	-1.41562	0.540253	0.0617607	0.109884	1.20929	no_significant	iron ABC transporter permease
BA_1339	-3.05138	0.712229	0.000122225	0.000503013	3.91284	down_regulated	iron ABC transporter permease
BA_3533	-5.64011	-1.64426	0.0306505	0.0609531	1.51356	no_significant	iron ABC transporter permease
BA_3865	-2.56641	-1.40454	0.186594	0.269049	0.729102	no_significant	iron ABC transporter permease
BA_3866	1.97697	-0.176515	0.0321299	0.0632966	1.49309	no_significant	iron ABC transporter permease
BA_4596	-1.1258	0.767737	0.100783	0.164356	0.996613	no_significant	iron ABC transporter permease
BA_4767	-0.121193	5.04181	0.830911	0.888587	0.0804452	no_significant	iron ABC transporter permease
BA_4785	-0.077558	-0.560687	1	1	0	no_significant	iron ABC transporter permease
BA_5328	0.964353	2.94049	0.0385446	0.0743664	1.41404	no_significant	iron ABC transporter permease
BA_5329	1.22203	3.9049	0.00808404	0.0193363	2.09237	no_significant	iron ABC transporter permease
BA_5630	-1.59808	-0.341694	0.125892	0.196111	0.900003	no_significant	iron ABC transporter permease
BA_3864	-3.25488	0.12434	0.000222629	0.00085459	3.65242	down_regulated	iron ABC transporter ATP-binding protein
BA_4595	-4.72858	0.875703	1.47e-08	1.37e-07	7.83345	down_regulated	iron ABC transporter ATP-binding protein
BA_4784	-2.98503	-1.23788	0.0365957	0.0709969	1.43657	no_significant	iron ABC transporter ATP-binding protein
BA_5327	0.44465	3.45614	0.399248	0.504215	0.398758	no_significant	iron ABC transporter ATP-binding protein
BA_5629	0.381252	0.921745	0.526514	0.626454	0.27859	no_significant	iron ABC transporter ATP-binding protein
BA_2001	0.768933	8.21618	0.179851	0.261026	0.745087	no_significant	intracellular serine protease
BA_1481	2.76905	4.31981	0.000150418	0.000600813	3.8227	up_regulated	integrase/recombinase
BA_4995	1.14952	3.03916	0.0258807	0.0529704	1.58702	no_significant	integrase/recombinase
BA_4168	2.02238	1.50918	8.68e-05	0.000371985	4.06123	up_regulated	inositol monophosphatase
BA_0008	0.2105	6.97778	0.617046	0.706011	0.209682	no_significant	inosine 5\'-monophosphate dehydrogenase
BA_0030	1.48218	3.89913	0.0057159	0.0144478	2.24292	no_significant	initiation-control protein YabA
BA_2486	-0.897749	1.79906	0.0645811	0.114177	1.18989	no_significant	indole-3-pyruvate decarboxylase
BA_1251	-0.219421	1.6515	0.719337	0.799137	0.143068	no_significant	indole-3-glycerol phosphate synthase
BA_0672	0.0783422	3.33303	0.899347	0.936141	0.0460727	no_significant	immune inhibitor A metalloprotease
BA_1295	0.475587	11.1808	0.262238	0.356372	0.581305	no_significant	immune inhibitor A
BA_3710	-2.02556	4.24115	0.00381649	0.0101725	2.41834	no_significant	imidazolonepropionase
BA_1427	-1.48753	2.72777	0.0516517	0.094785	1.28692	no_significant	imidazoleglycerol-phosphate dehydratase
BA_1428	-0.905279	2.70485	0.0612191	0.109105	1.21311	no_significant	imidazole glycerol phosphate synthase subunit HisH
BA_1430	0.0984619	2.89956	0.838704	0.894193	0.0763912	no_significant	imidazole glycerol phosphate synthase subunit HisF
mobile_genetic_element_4	1.4369	5.11866	0.00179367	0.00532372	2.74626	up_regulated	ID=id131;Note=Putative lysogenic prophage region%3B putative attL/R;gbkey=mobile_element;mobile_element_type=other:prophage lambda Ba02;
mobile_genetic_element_3	1.79332	4.32326	9.74e-05	0.000413175	4.01122	up_regulated	ID=id101;Note=Putative lysogenic prophage region%3B putative attL/R;gbkey=mobile_element;mobile_element_type=other:prophage lambda Ba03;
BA_0063	-1.51707	1.91531	0.00243614	0.0069139	2.6133	down_regulated	hypoxanthine-guanine phosphoribosyltransferase
BA_5074	-1.45375	1.08297	0.0334821	0.0656224	1.47519	no_significant	hypoxanthine-guanine phosphoribosyltransferase
BA_5873	-1.76138	-1.02243	0.112557	0.179596	0.948626	no_significant	hypothetical protein BA_5873
BA_5728	-1.72137	4.34785	0.000421748	0.00149316	3.37495	down_regulated	hypothetical protein BA_5728
BA_5725	3.68051	-0.253485	0.00012267	0.000504351	3.91126	up_regulated	hypothetical protein BA_5725
BA_5720	0.760392	0.391941	0.317873	0.416893	0.497746	no_significant	hypothetical protein BA_5720
BA_5719	-1.00394	4.98174	0.066587	0.11719	1.17661	no_significant	hypothetical protein BA_5719
BA_5713	0.214505	3.1054	0.633267	0.72143	0.198413	no_significant	hypothetical protein BA_5713
BA_5712	-0.0647871	1.76396	0.930623	0.957017	0.0312261	no_significant	hypothetical protein BA_5712
BA_5707	-1.2388	0.902078	0.0762311	0.130975	1.11787	no_significant	hypothetical protein BA_5707
BA_5704	1.58424	1.44159	0.00247746	0.00699342	2.60599	up_regulated	hypothetical protein BA_5704
BA_5702	2.91999	-0.208405	0.000649609	0.0021858	3.18735	up_regulated	hypothetical protein BA_5702
BA_5699	-0.719569	-0.496054	0.418657	0.52329	0.378142	no_significant	hypothetical protein BA_5699
BA_5697	-1.11575	1.75072	0.193613	0.277268	0.713066	no_significant	hypothetical protein BA_5697
BA_5688	3.08314	3.91391	3.27e-08	2.79e-07	7.48516	up_regulated	hypothetical protein BA_5688
BA_5686	-2.21871	2.52196	6.07e-05	0.000272155	4.217	down_regulated	hypothetical protein BA_5686
BA_5683	0.756594	-0.434921	0.430903	0.534941	0.36562	no_significant	hypothetical protein BA_5683
BA_5681	1.36821	0.4415	0.0996846	0.162767	1.00137	no_significant	hypothetical protein BA_5681
BA_5680	1.50179	0.233326	0.0438783	0.0828331	1.35775	no_significant	hypothetical protein BA_5680
BA_5679	0.0216442	-0.597848	1	1	2.17e-15	no_significant	hypothetical protein BA_5679
BA_5677	0.777495	1.08763	0.113654	0.180797	0.944417	no_significant	hypothetical protein BA_5677
BA_5676	-2.42804	-1.52909	0.146956	0.222337	0.832813	no_significant	hypothetical protein BA_5676
BA_5674	5.68232	0.301121	1.02e-08	9.76e-08	7.9898	up_regulated	hypothetical protein BA_5674
BA_5672	3.99867	3.35407	5.88e-12	1.01e-10	11.2307	up_regulated	hypothetical protein BA_5672
BA_5671	1.72291	3.57385	8.72e-05	0.000372683	4.05953	up_regulated	hypothetical protein BA_5671
BA_5665	2.80375	3.85673	9.09e-07	6e-06	6.04138	up_regulated	hypothetical protein BA_5665
BA_5664	0.735224	0.43894	0.210516	0.297024	0.676716	no_significant	hypothetical protein BA_5664
BA_5657	0.031179	-0.439153	1	1	3.04e-15	no_significant	hypothetical protein BA_5657
BA_5649	-2.89165	-0.493493	0.0131386	0.0293006	1.88145	no_significant	hypothetical protein BA_5649
BA_5647	3.67369	2.78123	6.75e-13	1.42e-11	12.1705	up_regulated	hypothetical protein BA_5647
BA_5642	1.85851	5.44709	0.000190788	0.00074439	3.71945	up_regulated	hypothetical protein BA_5642
BA_5632	0.138211	-1.25725	0.932683	0.958199	0.0302659	no_significant	hypothetical protein BA_5632
BA_5627	1.67707	4.05872	0.00231188	0.00662382	2.63603	up_regulated	hypothetical protein BA_5627
BA_5624	1.1144	3.98785	0.0231692	0.0480284	1.63509	no_significant	hypothetical protein BA_5624
BA_5615	1.41647	0.313116	0.0146816	0.0322795	1.83323	no_significant	hypothetical protein BA_5615
BA_5607	0.884136	3.42678	0.120838	0.189572	0.917798	no_significant	hypothetical protein BA_5607
BA_5582	-1.14714	-2.31168	0.632149	0.720938	0.19918	no_significant	hypothetical protein BA_5582
BA_5577	-5.16024	-1.93953	0.0810897	0.137249	1.09103	no_significant	hypothetical protein BA_5577
BA_5569	-2.46056	-0.140891	0.00328593	0.00894539	2.48334	down_regulated	hypothetical protein BA_5569
BA_5566	-0.225114	-0.403332	0.820033	0.880352	0.0861686	no_significant	hypothetical protein BA_5566
BA_5565	-1.51255	4.52211	0.0500587	0.0924057	1.30052	no_significant	hypothetical protein BA_5565
BA_5555	-1.69107	3.5803	0.000557543	0.00191587	3.25372	down_regulated	hypothetical protein BA_5555
BA_5545	-0.633649	0.17461	0.526428	0.626454	0.278661	no_significant	hypothetical protein BA_5545
BA_5544	1.74278	0.217106	0.015645	0.0341124	1.80562	no_significant	hypothetical protein BA_5544
BA_5531	-7.8255	-0.0369957	1.23e-06	7.91e-06	5.91076	down_regulated	hypothetical protein BA_5531
BA_5530	-1.76576	2.1706	0.000957647	0.00307428	3.01879	down_regulated	hypothetical protein BA_5530
BA_5519	0.830624	-1.11775	0.499636	0.60214	0.301346	no_significant	hypothetical protein BA_5519
BA_5516	1.15463	1.38326	0.0971143	0.159121	1.01272	no_significant	hypothetical protein BA_5516
BA_5515	2.19013	-0.772425	0.0806127	0.136827	1.0936	no_significant	hypothetical protein BA_5515
BA_5513	-1.1398	1.77103	0.0217447	0.0455695	1.66265	no_significant	hypothetical protein BA_5513
BA_5502	-0.581706	-0.422412	0.529215	0.628246	0.276368	no_significant	hypothetical protein BA_5502
BA_5494	2.06585	6.2091	5.02e-06	2.84e-05	5.29949	up_regulated	hypothetical protein BA_5494
BA_5489	-0.214349	0.680293	0.74415	0.821064	0.128339	no_significant	hypothetical protein BA_5489
BA_5488	0.114813	-0.0121053	0.905889	0.941498	0.0429251	no_significant	hypothetical protein BA_5488
BA_5486	-1.69022	1.54108	0.0111538	0.0254545	1.95258	no_significant	hypothetical protein BA_5486
BA_5485	-1.36858	-1.64514	0.228419	0.31841	0.641268	no_significant	hypothetical protein BA_5485
BA_5484	-0.802494	0.464857	0.232008	0.322693	0.634496	no_significant	hypothetical protein BA_5484
BA_5483	-0.801531	-0.0795239	0.379643	0.48491	0.420625	no_significant	hypothetical protein BA_5483
BA_5482	-2.12008	1.63036	6.08e-05	0.000272339	4.21609	down_regulated	hypothetical protein BA_5482
BA_5481	3.02514	2.78963	1.79e-10	2.37e-09	9.7478	up_regulated	hypothetical protein BA_5481
BA_5478	1.88699	0.275404	0.0093333	0.0218574	2.02996	no_significant	hypothetical protein BA_5478
BA_5476	-2.37513	-0.218374	0.00900745	0.0212124	2.0454	no_significant	hypothetical protein BA_5476
BA_5468	-1.32788	0.419991	0.0538786	0.0981435	1.26858	no_significant	hypothetical protein BA_5468
BA_5467	0.568779	3.04174	0.19676	0.280723	0.706063	no_significant	hypothetical protein BA_5467
BA_5466	2.06612	-0.409841	0.0597038	0.106857	1.224	no_significant	hypothetical protein BA_5466
BA_5455	1.09364	-1.26509	0.357041	0.45938	0.447282	no_significant	hypothetical protein BA_5455
BA_5453	-0.689665	-1.92622	0.742024	0.819578	0.129582	no_significant	hypothetical protein BA_5453
BA_5452	0.130282	-0.1813	0.951485	0.971809	0.0215979	no_significant	hypothetical protein BA_5452
BA_5451	4.79835	2.57205	9.01e-13	1.81e-11	12.0453	up_regulated	hypothetical protein BA_5451
BA_5438	-5.59891	-1.66372	0.0530066	0.0968066	1.27567	no_significant	hypothetical protein BA_5438
BA_5427	2.81197	3.84596	4.22e-09	4.33e-08	8.37428	up_regulated	hypothetical protein BA_5427
BA_5412	0.537934	3.98602	0.221821	0.310475	0.653998	no_significant	hypothetical protein BA_5412
BA_5405	-0.453418	2.88637	0.511726	0.612967	0.290963	no_significant	hypothetical protein BA_5405
BA_5399	2.15284	-0.631631	0.0674636	0.118329	1.17093	no_significant	hypothetical protein BA_5399
BA_5393	1.77031	0.55359	0.00457652	0.0119041	2.33946	no_significant	hypothetical protein BA_5393
BA_5388	-0.876361	2.64274	0.0533815	0.0974067	1.27261	no_significant	hypothetical protein BA_5388
BA_5386	2.19854	1.83896	1.45e-05	7.5e-05	4.83953	up_regulated	hypothetical protein BA_5386
BA_5379	-10.5144	2.31995	1.97e-19	8.91e-18	18.7056	down_regulated	hypothetical protein BA_5379
BA_5378	-7.52194	-0.280354	5.39e-06	3.03e-05	5.26812	down_regulated	hypothetical protein BA_5378
BA_5373	-9.06707	5.52305	1.58e-33	7.41e-31	32.8001	down_regulated	hypothetical protein BA_5373
BA_5371	0.677886	0.580445	0.306198	0.405245	0.513998	no_significant	hypothetical protein BA_5371
BA_5361	2.28479	-0.100565	0.00317835	0.00868624	2.4978	up_regulated	hypothetical protein BA_5361
BA_5358	0.89734	0.371556	0.179629	0.260883	0.745624	no_significant	hypothetical protein BA_5358
BA_5355	-4.99919	-2.04775	0.116507	0.183908	0.933646	no_significant	hypothetical protein BA_5355
BA_5353	2.15209	0.950442	0.00892486	0.0210533	2.0494	no_significant	hypothetical protein BA_5353
BA_5351	-0.789136	0.182548	0.300439	0.399005	0.522243	no_significant	hypothetical protein BA_5351
BA_5349	1.60684	-0.438318	0.0725234	0.125425	1.13952	no_significant	hypothetical protein BA_5349
BA_5346	4.87903	8.34502	5.7e-15	1.59e-13	14.2441	up_regulated	hypothetical protein BA_5346
BA_5345	0.291333	-0.0623927	0.665206	0.750297	0.177044	no_significant	hypothetical protein BA_5345
BA_5325	4.2281	1.37784	1.25e-12	2.46e-11	11.9027	up_regulated	hypothetical protein BA_5325
BA_5321	0.811638	-0.471167	0.450721	0.554307	0.346092	no_significant	hypothetical protein BA_5321
BA_5318	-1.49579	-1.05462	0.249053	0.341771	0.603707	no_significant	hypothetical protein BA_5318
BA_5316	0.788422	0.321824	0.250891	0.343617	0.600514	no_significant	hypothetical protein BA_5316
BA_5312	-0.182815	3.97523	0.684572	0.767427	0.164581	no_significant	hypothetical protein BA_5312
BA_5307	-9.16755	1.09835	2.11e-12	3.93e-11	11.6759	down_regulated	hypothetical protein BA_5307
BA_5305	-3.63852	-0.769852	0.00255853	0.00720775	2.59201	down_regulated	hypothetical protein BA_5305
BA_5303	-4.40461	-0.126473	8.51e-05	0.000365812	4.06983	down_regulated	hypothetical protein BA_5303
BA_5302	-5.92902	1.1204	6.93e-10	8.08e-09	9.15911	down_regulated	hypothetical protein BA_5302
BA_5295	-1.50351	-1.02783	0.200563	0.285665	0.697749	no_significant	hypothetical protein BA_5295
BA_5294	-0.465223	1.00999	0.507977	0.609398	0.294156	no_significant	hypothetical protein BA_5294
BA_5291	1.8055	-0.205748	0.0178446	0.0383127	1.74849	no_significant	hypothetical protein BA_5291
BA_5283	1.72283	1.49674	0.00190734	0.00563759	2.71957	up_regulated	hypothetical protein BA_5283
BA_5281	2.02427	6.22535	0.000543071	0.00187379	3.26514	up_regulated	hypothetical protein BA_5281
BA_5279	-2.39812	0.325637	0.0014079	0.00429727	2.85143	down_regulated	hypothetical protein BA_5279
BA_5277	-0.329472	1.13247	0.597601	0.688822	0.223589	no_significant	hypothetical protein BA_5277
BA_5274	-0.604269	1.54747	0.261961	0.356227	0.581763	no_significant	hypothetical protein BA_5274
BA_5272	2.16141	2.36602	1.03e-05	5.51e-05	4.98667	up_regulated	hypothetical protein BA_5272
BA_5268	-1.13154	-1.41938	0.335582	0.435366	0.474202	no_significant	hypothetical protein BA_5268
BA_5266	-0.83353	7.11996	0.0671358	0.117901	1.17305	no_significant	hypothetical protein BA_5266
BA_5265	-0.396445	-0.107925	0.634752	0.722926	0.197396	no_significant	hypothetical protein BA_5265
BA_5264	-2.6	0.489263	0.000777514	0.00256086	3.10929	down_regulated	hypothetical protein BA_5264
BA_5259	3.83098	-0.930303	0.000168136	0.000662774	3.77434	up_regulated	hypothetical protein BA_5259
BA_5258	0.181491	0.0519841	0.863651	0.912234	0.0636618	no_significant	hypothetical protein BA_5258
BA_5257	-0.418924	-0.392504	0.714789	0.794924	0.145822	no_significant	hypothetical protein BA_5257
BA_5255	2.36634	3.68811	0.000110004	0.000457642	3.95859	up_regulated	hypothetical protein BA_5255
BA_5247	-3.10724	0.0341417	0.0017677	0.0052581	2.75259	down_regulated	hypothetical protein BA_5247
BA_5245	-2.38431	-0.50698	0.0168419	0.0363639	1.77361	no_significant	hypothetical protein BA_5245
BA_5242	-8.99486	3.94722	1.11e-27	1.56e-25	26.953	down_regulated	hypothetical protein BA_5242
BA_5239	1.58256	7.31921	0.000396784	0.0014155	3.40145	up_regulated	hypothetical protein BA_5239
BA_5238	0.105228	1.9464	0.869651	0.91673	0.060655	no_significant	hypothetical protein BA_5238
BA_5229	0.140296	2.37519	0.828595	0.886787	0.0816575	no_significant	hypothetical protein BA_5229
BA_5226	-4.47169	-0.0937485	1.77e-05	8.97e-05	4.75217	down_regulated	hypothetical protein BA_5226
BA_5212	-0.734964	-0.696703	0.583215	0.676317	0.234171	no_significant	hypothetical protein BA_5212
BA_5208	-0.765327	0.278553	0.295528	0.393323	0.529401	no_significant	hypothetical protein BA_5208
BA_5204	-0.47408	1.61692	0.434586	0.538084	0.361924	no_significant	hypothetical protein BA_5204
BA_5203	-1.80033	3.64755	0.000239512	0.000911664	3.62067	down_regulated	hypothetical protein BA_5203
BA_5201	-0.336973	2.22757	0.496621	0.599194	0.303975	no_significant	hypothetical protein BA_5201
BA_5198	1.65369	-0.956554	0.121082	0.189885	0.91692	no_significant	hypothetical protein BA_5198
BA_5197	5.06909	0.147663	9.91e-09	9.49e-08	8.004	up_regulated	hypothetical protein BA_5197
BA_5196	0.138914	2.48212	0.834187	0.890958	0.0787363	no_significant	hypothetical protein BA_5196
BA_5194	2.9121	2.54094	9.94e-08	7.74e-07	7.00256	up_regulated	hypothetical protein BA_5194
BA_5189	-0.117891	0.88024	0.869457	0.91673	0.0607517	no_significant	hypothetical protein BA_5189
BA_5186	1.62166	9.36926	0.00438089	0.0114804	2.35844	no_significant	hypothetical protein BA_5186
BA_5184	-1.54854	-1.03616	0.219656	0.307958	0.658257	no_significant	hypothetical protein BA_5184
BA_5182	-4.62999	-2.22993	0.073481	0.126757	1.13383	no_significant	hypothetical protein BA_5182
BA_5181	-1.1101	-1.30521	0.400418	0.504995	0.397487	no_significant	hypothetical protein BA_5181
BA_5180	1.94728	-0.777393	0.0672459	0.117996	1.17233	no_significant	hypothetical protein BA_5180
BA_5179	2.14936	0.283903	0.00648947	0.0160841	2.18779	no_significant	hypothetical protein BA_5179
BA_5176	-0.661518	-1.14167	0.599181	0.689878	0.222442	no_significant	hypothetical protein BA_5176
BA_5172	1.09096	-0.389443	0.179725	0.260933	0.745392	no_significant	hypothetical protein BA_5172
BA_5169	-0.506214	5.36943	0.275925	0.372207	0.559209	no_significant	hypothetical protein BA_5169
BA_5168	-0.875665	1.9211	0.154862	0.231962	0.810055	no_significant	hypothetical protein BA_5168
BA_5165	2.08767	-0.35626	0.00615038	0.0153613	2.2111	no_significant	hypothetical protein BA_5165
BA_5162	3.20106	2.95291	2.45e-07	1.79e-06	6.6114	up_regulated	hypothetical protein BA_5162
BA_5157	1.9172	-0.192371	0.00712729	0.0174085	2.14708	no_significant	hypothetical protein BA_5157
BA_5156	-4.99762	3.79651	7.32e-12	1.22e-10	11.1355	down_regulated	hypothetical protein BA_5156
BA_5154	-1.91183	1.35468	0.012061	0.0272735	1.91862	no_significant	hypothetical protein BA_5154
BA_5151	-0.227094	-1.54581	0.892932	0.93216	0.0491814	no_significant	hypothetical protein BA_5151
BA_5149	-3.63131	1.55709	2.26e-05	0.000111635	4.64614	down_regulated	hypothetical protein BA_5149
BA_5145	-0.985423	0.678891	0.125503	0.195578	0.901347	no_significant	hypothetical protein BA_5145
BA_5144	-5.89043	4.29109	3.98e-17	1.45e-15	16.4005	down_regulated	hypothetical protein BA_5144
BA_5143	-0.263737	3.12021	0.602107	0.69174	0.220327	no_significant	hypothetical protein BA_5143
BA_5140	1.58804	-1.60682	0.2461	0.33882	0.608889	no_significant	hypothetical protein BA_5140
BA_5137	0.658276	-1.19849	0.5272	0.626916	0.278025	no_significant	hypothetical protein BA_5137
BA_5131	-5.6217	6.19337	2.97e-24	3.05e-22	23.5267	down_regulated	hypothetical protein BA_5131
BA_5129	-6.72129	-0.899313	0.000387238	0.00138851	3.41202	down_regulated	hypothetical protein BA_5129
BA_5128	-4.40981	-0.122534	6.53e-05	0.000289357	4.18517	down_regulated	hypothetical protein BA_5128
BA_5116	-1.49634	4.49723	0.0038797	0.0103279	2.4112	no_significant	hypothetical protein BA_5116
BA_5114	-6.92431	4.50239	9.18e-16	2.78e-14	15.0374	down_regulated	hypothetical protein BA_5114
BA_5102	-5.2741	-1.88705	0.0552119	0.100138	1.25797	no_significant	hypothetical protein BA_5102
BA_5100	-2.23869	1.27084	0.000760271	0.002508	3.11903	down_regulated	hypothetical protein BA_5100
BA_5098	-2.04925	3.69989	0.000627715	0.00212574	3.20224	down_regulated	hypothetical protein BA_5098
BA_5093	-6.18601	-1.28183	0.00376935	0.0100638	2.42373	no_significant	hypothetical protein BA_5093
BA_5078	-0.486967	1.57223	0.457603	0.560804	0.339511	no_significant	hypothetical protein BA_5078
BA_5077	-0.107953	-0.0781505	0.882983	0.925449	0.0540478	no_significant	hypothetical protein BA_5077
BA_5072	4.85852	6.39237	8.28e-21	4.52e-19	20.0819	up_regulated	hypothetical protein BA_5072
BA_5071	0.870185	3.91457	0.0613637	0.109316	1.21209	no_significant	hypothetical protein BA_5071
BA_5061	1.14316	3.40306	0.0158339	0.0344707	1.80041	no_significant	hypothetical protein BA_5061
BA_5060	-1.14909	-0.769603	0.277667	0.374196	0.556476	no_significant	hypothetical protein BA_5060
BA_5059	-1.09194	0.440639	0.0951539	0.156763	1.02157	no_significant	hypothetical protein BA_5059
BA_5057	4.62831	5.56169	2.34e-16	7.76e-15	15.6302	up_regulated	hypothetical protein BA_5057
BA_5056	1.38489	2.18602	0.00604379	0.015131	2.21869	no_significant	hypothetical protein BA_5056
BA_5055	0.970656	-1.02749	0.406249	0.511428	0.391208	no_significant	hypothetical protein BA_5055
BA_5046	0.192554	-2.03231	1	1	0	no_significant	hypothetical protein BA_5046
BA_5044	-3.61302	-0.722853	0.00477809	0.0123217	2.32075	no_significant	hypothetical protein BA_5044
BA_5042	2.29442	1.18191	0.000743539	0.00246052	3.1287	up_regulated	hypothetical protein BA_5042
BA_5040	1.91429	-1.01168	0.0666678	0.117275	1.17608	no_significant	hypothetical protein BA_5040
BA_5039	5.84897	-0.115871	4.74e-06	2.71e-05	5.3239	up_regulated	hypothetical protein BA_5039
BA_5035	-0.613801	-1.05751	0.595421	0.687062	0.225176	no_significant	hypothetical protein BA_5035
BA_5034	1.3637	0.930055	0.0215628	0.0452568	1.6663	no_significant	hypothetical protein BA_5034
BA_5032	0.53891	-1.90024	0.789923	0.85813	0.102415	no_significant	hypothetical protein BA_5032
BA_5027	-0.196419	0.729274	0.79853	0.864509	0.0977089	no_significant	hypothetical protein BA_5027
BA_5023	0.147321	-1.50362	0.890352	0.930852	0.0504385	no_significant	hypothetical protein BA_5023
BA_5022	0.230587	3.40256	0.774877	0.846748	0.110767	no_significant	hypothetical protein BA_5022
BA_5020	3.13538	2.60051	5.89e-11	8.32e-10	10.2296	up_regulated	hypothetical protein BA_5020
BA_5015	1.6937	0.9983	0.00351268	0.00948288	2.45436	up_regulated	hypothetical protein BA_5015
BA_5011	0.00813868	0.315149	1	1	0	no_significant	hypothetical protein BA_5011
BA_5009	-2.44297	0.287413	0.00165486	0.00497168	2.78124	down_regulated	hypothetical protein BA_5009
BA_5007	3.15565	2.15546	2.37e-06	1.43e-05	5.62519	up_regulated	hypothetical protein BA_5007
BA_5006	0.965202	2.59281	0.0725654	0.125446	1.13927	no_significant	hypothetical protein BA_5006
BA_5004	-0.750777	-0.0181222	0.287115	0.383997	0.541945	no_significant	hypothetical protein BA_5004
BA_5001	-3.03802	-0.38765	0.0118558	0.0268962	1.92607	no_significant	hypothetical protein BA_5001
BA_5000	-7.78725	4.25406	7.09e-24	6.78e-22	23.1494	down_regulated	hypothetical protein BA_5000
BA_4999	-5.84374	-1.5268	0.0169331	0.0365422	1.77126	no_significant	hypothetical protein BA_4999
BA_4998	0.326631	-1.27192	0.776871	0.847013	0.109651	no_significant	hypothetical protein BA_4998
BA_4989	-4.28634	1.41146	6.29e-08	5.13e-07	7.20139	down_regulated	hypothetical protein BA_4989
BA_4988	-1.18413	-0.585913	0.206976	0.292815	0.684081	no_significant	hypothetical protein BA_4988
BA_4982	8.49808	4.47786	1.93e-21	1.19e-19	20.7142	up_regulated	hypothetical protein BA_4982
BA_4979	-1.84025	-1.85777	0.285236	0.381827	0.544796	no_significant	hypothetical protein BA_4979
BA_4978	-2.80525	3.11635	6.26e-06	3.47e-05	5.20369	down_regulated	hypothetical protein BA_4978
BA_4970	-0.28509	0.225848	0.801054	0.866572	0.0963383	no_significant	hypothetical protein BA_4970
BA_4964	1.26573	-0.619165	0.246908	0.339599	0.607466	no_significant	hypothetical protein BA_4964
BA_4963	-0.0813967	1.84869	0.864288	0.912678	0.0633413	no_significant	hypothetical protein BA_4963
BA_4960	-2.06575	-0.0283049	0.0274883	0.0555578	1.56085	no_significant	hypothetical protein BA_4960
BA_4951	-3.37169	1.77444	6.37e-08	5.18e-07	7.19616	down_regulated	hypothetical protein BA_4951
BA_4948	-0.140186	2.09742	0.794583	0.8609	0.0998608	no_significant	hypothetical protein BA_4948
BA_4944	-0.771242	0.939897	0.219788	0.30804	0.657996	no_significant	hypothetical protein BA_4944
BA_4940	-0.573134	3.61494	0.29552	0.393323	0.529413	no_significant	hypothetical protein BA_4940
BA_4939	-1.73365	3.71009	0.000896018	0.00289674	3.04768	down_regulated	hypothetical protein BA_4939
BA_4936	-0.0378704	2.92886	0.938201	0.961753	0.0277042	no_significant	hypothetical protein BA_4936
BA_4935	-0.728825	-0.658728	0.471433	0.574229	0.32658	no_significant	hypothetical protein BA_4935
BA_4932	3.53982	0.788837	7.83e-05	0.000339362	4.10599	up_regulated	hypothetical protein BA_4932
BA_4931	2.21581	2.17984	2.04e-05	0.000101668	4.69034	up_regulated	hypothetical protein BA_4931
BA_4928	2.8788	5.09238	3.5e-08	2.96e-07	7.45593	up_regulated	hypothetical protein BA_4928
BA_4927	2.22848	1.30486	0.00153774	0.00465304	2.81312	up_regulated	hypothetical protein BA_4927
BA_4926	5.56278	-0.90843	1.53e-06	9.52e-06	5.8167	up_regulated	hypothetical protein BA_4926
BA_4922	-3.24601	1.69967	8.48e-07	5.62e-06	6.07143	down_regulated	hypothetical protein BA_4922
BA_4912	-1.38325	-1.48108	0.392497	0.497992	0.406163	no_significant	hypothetical protein BA_4912
BA_4910	1.16878	-0.330535	0.27494	0.370997	0.560762	no_significant	hypothetical protein BA_4910
BA_4905	0.448172	0.70437	0.432592	0.536425	0.363922	no_significant	hypothetical protein BA_4905
BA_4895	0.113534	7.52405	0.818023	0.879276	0.0872343	no_significant	hypothetical protein BA_4895
BA_4892	-1.32519	-1.06586	0.392381	0.497992	0.406292	no_significant	hypothetical protein BA_4892
BA_4889	-1.2258	0.37706	0.132381	0.204328	0.878176	no_significant	hypothetical protein BA_4889
BA_4886	-1.34305	-1.15638	0.410087	0.514566	0.387124	no_significant	hypothetical protein BA_4886
BA_4885	3.825	4.7486	6.84e-15	1.87e-13	14.1648	up_regulated	hypothetical protein BA_4885
BA_4884	3.95401	3.68945	4.28e-10	5.31e-09	9.36839	up_regulated	hypothetical protein BA_4884
BA_4882	-0.516036	-1.47029	0.71071	0.790806	0.148307	no_significant	hypothetical protein BA_4882
BA_4876	0.744606	1.49145	0.148078	0.223713	0.829509	no_significant	hypothetical protein BA_4876
BA_4872	3.64859	6.34814	1.59e-14	4.15e-13	13.7986	up_regulated	hypothetical protein BA_4872
BA_4866	-0.4894	-2.13149	0.861781	0.911175	0.0646029	no_significant	hypothetical protein BA_4866
BA_4865	3.86412	3.94423	1.97e-14	5.11e-13	13.706	up_regulated	hypothetical protein BA_4865
BA_4864	1.74764	2.32173	0.00112304	0.00352762	2.94961	up_regulated	hypothetical protein BA_4864
BA_4859	1.77594	-1.27092	0.155559	0.232674	0.808106	no_significant	hypothetical protein BA_4859
BA_4858	0.344687	3.84219	0.426061	0.530967	0.370528	no_significant	hypothetical protein BA_4858
BA_4855	2.77119	-1.23242	0.0178938	0.0383987	1.7473	no_significant	hypothetical protein BA_4855
BA_4854	2.40256	2.85832	2.55e-07	1.86e-06	6.59382	up_regulated	hypothetical protein BA_4854
BA_4840	-5.60579	-1.66834	0.031773	0.0627404	1.49794	no_significant	hypothetical protein BA_4840
BA_4836	2.25361	6.45908	3.6e-05	0.000170117	4.44373	up_regulated	hypothetical protein BA_4836
BA_4829	-0.274153	3.51208	0.631205	0.720057	0.199829	no_significant	hypothetical protein BA_4829
BA_4821	-4.71739	1.45416	4.2e-08	3.52e-07	7.37675	down_regulated	hypothetical protein BA_4821
BA_4816	1.68986	1.98348	0.000949562	0.00305108	3.02248	up_regulated	hypothetical protein BA_4816
BA_4800	2.63102	0.352408	0.000548077	0.00188797	3.26116	up_regulated	hypothetical protein BA_4800
BA_4799	1.37543	2.36338	0.0125652	0.0282617	1.90083	no_significant	hypothetical protein BA_4799
BA_4788	1.30192	0.0961791	0.112937	0.17993	0.947162	no_significant	hypothetical protein BA_4788
BA_4787	0.928415	-0.101262	0.215917	0.303424	0.665713	no_significant	hypothetical protein BA_4787
BA_4781	-2.4777	-1.57133	0.0959174	0.157466	1.0181	no_significant	hypothetical protein BA_4781
BA_4772	2.04018	1.2704	0.000198625	0.000771391	3.70197	up_regulated	hypothetical protein BA_4772
BA_4770	2.63971	3.70236	0.000171511	0.000675447	3.76571	up_regulated	hypothetical protein BA_4770
BA_4768	0.0722246	7.60472	0.863149	0.911933	0.063914	no_significant	hypothetical protein BA_4768
BA_4764	1.57311	-0.126804	0.104935	0.169752	0.979081	no_significant	hypothetical protein BA_4764
BA_4756	0.271953	1.95491	0.589696	0.68139	0.229372	no_significant	hypothetical protein BA_4756
BA_4751	0.642443	2.13243	0.201129	0.286181	0.696524	no_significant	hypothetical protein BA_4751
BA_4746	-6.32319	-1.18945	0.00147141	0.00447486	2.83227	down_regulated	hypothetical protein BA_4746
BA_4744	-1.12858	-0.542828	0.213735	0.301162	0.670125	no_significant	hypothetical protein BA_4744
BA_4741	2.53572	-0.25773	0.00261882	0.00735297	2.58189	up_regulated	hypothetical protein BA_4741
BA_4710	3.54265	6.56027	9.12e-09	8.9e-08	8.04023	up_regulated	hypothetical protein BA_4710
BA_4707	3.8392	2.29992	4.32e-06	2.49e-05	5.36477	up_regulated	hypothetical protein BA_4707
BA_4706	1.28465	1.75728	0.0230484	0.0478251	1.63736	no_significant	hypothetical protein BA_4706
BA_4688	1.64552	-1.33757	0.286187	0.382979	0.54335	no_significant	hypothetical protein BA_4688
BA_4675	-0.446488	8.36156	0.28255	0.378956	0.548905	no_significant	hypothetical protein BA_4675
BA_4665	2.05013	3.40795	0.000103263	0.000433024	3.98606	up_regulated	hypothetical protein BA_4665
BA_4657	-2.91532	-1.24589	0.0853408	0.143348	1.06884	no_significant	hypothetical protein BA_4657
BA_4645	-3.82225	2.41243	4.45e-11	6.41e-10	10.3514	down_regulated	hypothetical protein BA_4645
BA_4644	-0.653171	0.383714	0.359232	0.461352	0.444625	no_significant	hypothetical protein BA_4644
BA_4642	-0.303673	-0.921118	0.752568	0.827962	0.123455	no_significant	hypothetical protein BA_4642
BA_4624	2.37907	2.96661	3.67e-07	2.61e-06	6.43491	up_regulated	hypothetical protein BA_4624
BA_4621	-1.10204	1.858	0.0305298	0.0607418	1.51528	no_significant	hypothetical protein BA_4621
BA_4620	-4.46686	-2.31676	0.094613	0.155934	1.02405	no_significant	hypothetical protein BA_4620
BA_4618	-3.56076	0.663203	8.99e-06	4.89e-05	5.04611	down_regulated	hypothetical protein BA_4618
BA_4617	6.13327	-2.0774	0.0167344	0.0361875	1.77639	no_significant	hypothetical protein BA_4617
BA_4615	-0.25701	2.25739	0.599338	0.689878	0.222328	no_significant	hypothetical protein BA_4615
BA_4613	1.11998	3.67612	0.0413792	0.0788943	1.38322	no_significant	hypothetical protein BA_4613
BA_4612	-0.962365	-0.537486	0.420039	0.52455	0.37671	no_significant	hypothetical protein BA_4612
BA_4605	1.38701	1.92481	0.00441071	0.011537	2.35549	no_significant	hypothetical protein BA_4605
BA_4594	0.664904	2.05197	0.224248	0.313143	0.649272	no_significant	hypothetical protein BA_4594
BA_4591	3.00106	-0.694881	0.0011577	0.00361759	2.9364	up_regulated	hypothetical protein BA_4591
BA_4583	-2.79579	2.48576	4.61e-05	0.000212496	4.33614	down_regulated	hypothetical protein BA_4583
BA_4581	1.67453	1.90073	0.002241	0.0064515	2.64956	up_regulated	hypothetical protein BA_4581
BA_4580	2.1567	-0.0117407	0.00343698	0.00931438	2.46382	up_regulated	hypothetical protein BA_4580
BA_4578	4.61709	2.96336	5.99e-15	1.66e-13	14.2222	up_regulated	hypothetical protein BA_4578
BA_4577	0.797856	0.450842	0.271519	0.367088	0.566199	no_significant	hypothetical protein BA_4577
BA_4569	1.65781	-0.625091	0.0422698	0.0802649	1.37397	no_significant	hypothetical protein BA_4569
BA_4568	-0.736522	0.742508	0.34954	0.450556	0.456504	no_significant	hypothetical protein BA_4568
BA_4563	-2.51403	0.38421	0.000818151	0.00267793	3.08717	down_regulated	hypothetical protein BA_4563
BA_4557	-4.49312	-0.0767084	1.56e-05	8.03e-05	4.8061	down_regulated	hypothetical protein BA_4557
BA_4553	-1.4269	0.353167	0.133008	0.204996	0.876121	no_significant	hypothetical protein BA_4553
BA_4552	-0.0375066	4.82739	0.934923	0.959797	0.029224	no_significant	hypothetical protein BA_4552
BA_4550	6.8555	2.27763	4.24e-22	2.83e-20	21.3728	up_regulated	hypothetical protein BA_4550
BA_4545	-6.56885	-1.00234	0.00226582	0.00651851	2.64477	down_regulated	hypothetical protein BA_4545
BA_4533	0.301047	7.70015	0.494035	0.596586	0.306242	no_significant	hypothetical protein BA_4533
BA_4532	-6.01817	5.27829	3.58e-26	4.18e-24	25.4461	down_regulated	hypothetical protein BA_4532
BA_4528	1.31696	3.85036	0.00290806	0.00806668	2.5364	up_regulated	hypothetical protein BA_4528
BA_4507	-6.2693	3.14329	3.22e-20	1.61e-18	19.4923	down_regulated	hypothetical protein BA_4507
BA_4506	1.90668	1.51341	0.00021258	0.000818784	3.67248	up_regulated	hypothetical protein BA_4506
BA_4501	-2.87569	-0.204174	0.00105763	0.00335473	2.97567	down_regulated	hypothetical protein BA_4501
BA_4500	3.5294	3.64061	2.22e-11	3.38e-10	10.6528	up_regulated	hypothetical protein BA_4500
BA_4498	-9.65221	1.52942	1.32e-14	3.53e-13	13.8778	down_regulated	hypothetical protein BA_4498
BA_4486	2.255	6.70727	1.77e-07	1.32e-06	6.75127	up_regulated	hypothetical protein BA_4486
BA_4484	1.92964	2.9406	4.53e-05	0.00020924	4.34371	up_regulated	hypothetical protein BA_4484
BA_4482	5.65234	1.21088	1.13e-11	1.83e-10	10.9469	up_regulated	hypothetical protein BA_4482
BA_4476	1.52689	-1.02745	0.0731977	0.126383	1.1355	no_significant	hypothetical protein BA_4476
BA_4475	3.42892	-0.869372	0.000591564	0.00201304	3.228	up_regulated	hypothetical protein BA_4475
BA_4473	2.40893	6.63611	2.21e-06	1.35e-05	5.65625	up_regulated	hypothetical protein BA_4473
BA_4468	3.18445	4.81732	2.74e-11	4.07e-10	10.562	up_regulated	hypothetical protein BA_4468
BA_4467	0.269595	6.23773	0.609035	0.698174	0.215358	no_significant	hypothetical protein BA_4467
BA_4466	-2.66793	1.70696	1.34e-06	8.55e-06	5.87213	down_regulated	hypothetical protein BA_4466
BA_4465	0.882013	0.148719	0.176261	0.257147	0.753843	no_significant	hypothetical protein BA_4465
BA_4463	-5.65042	-1.64048	0.0188352	0.0401321	1.72503	no_significant	hypothetical protein BA_4463
BA_4459	1.48493	1.92192	0.00139263	0.00425373	2.85616	up_regulated	hypothetical protein BA_4459
BA_4456	-2.21016	3.37763	5.44e-05	0.00024687	4.26432	down_regulated	hypothetical protein BA_4456
BA_4455	0.0936794	2.31826	0.846639	0.899688	0.0723015	no_significant	hypothetical protein BA_4455
BA_4453	1.68405	3.57933	0.00323364	0.00883091	2.49031	up_regulated	hypothetical protein BA_4453
BA_4451	-2.79699	2.77841	1.68e-08	1.55e-07	7.77465	down_regulated	hypothetical protein BA_4451
BA_4443	2.26384	0.248671	0.000512171	0.00177592	3.29059	up_regulated	hypothetical protein BA_4443
BA_4441	1.1989	0.969457	0.109073	0.175032	0.962284	no_significant	hypothetical protein BA_4441
BA_4440	0.273109	0.422747	0.664835	0.75008	0.177286	no_significant	hypothetical protein BA_4440
BA_4439	-0.666302	-0.108339	0.479612	0.582347	0.31911	no_significant	hypothetical protein BA_4439
BA_4437	1.46075	3.02327	0.00284559	0.00791571	2.54583	up_regulated	hypothetical protein BA_4437
BA_4432	1.61855	3.33984	0.00146136	0.00444752	2.83524	up_regulated	hypothetical protein BA_4432
BA_4430	-1.84601	-0.887174	0.0919344	0.152365	1.03652	no_significant	hypothetical protein BA_4430
BA_4426	1.77966	2.07391	0.00169228	0.00506599	2.77153	up_regulated	hypothetical protein BA_4426
BA_4425	0.450711	3.7108	0.314842	0.41408	0.501907	no_significant	hypothetical protein BA_4425
BA_4424	-8.61179	0.616217	3.47e-09	3.59e-08	8.46018	down_regulated	hypothetical protein BA_4424
BA_4420	2.94746	0.310709	0.000137315	0.000558557	3.86228	up_regulated	hypothetical protein BA_4420
BA_4419	-0.413958	-1.23009	0.844456	0.898503	0.0734228	no_significant	hypothetical protein BA_4419
BA_4418	-7.72749	-0.115647	3.01e-06	1.79e-05	5.52123	down_regulated	hypothetical protein BA_4418
BA_4407	2.07909	8.93487	1.98e-05	9.92e-05	4.70341	up_regulated	hypothetical protein BA_4407
BA_4393	-0.380333	-1.40334	0.825955	0.88492	0.0830437	no_significant	hypothetical protein BA_4393
BA_4392	5.25065	-1.14482	9.88e-05	0.000416782	4.00527	up_regulated	hypothetical protein BA_4392
BA_4379	1.32778	0.901825	0.0690888	0.120426	1.16059	no_significant	hypothetical protein BA_4379
BA_4378	-0.132704	2.27684	0.79413	0.860632	0.100108	no_significant	hypothetical protein BA_4378
BA_4371	7.04101	1.51169	2.11e-17	7.91e-16	16.6766	up_regulated	hypothetical protein BA_4371
BA_4365	3.21513	8.76462	4.21e-13	9.03e-12	12.3758	up_regulated	hypothetical protein BA_4365
BA_4350	1.32507	1.109	0.138793	0.212665	0.857631	no_significant	hypothetical protein BA_4350
BA_4349	3.61141	-0.15204	1.07e-05	5.71e-05	4.96869	up_regulated	hypothetical protein BA_4349
BA_4344	-0.627849	-1.6697	0.64015	0.728088	0.193718	no_significant	hypothetical protein BA_4344
BA_4342	2.85384	2.65569	8.7e-05	0.000372253	4.06048	up_regulated	hypothetical protein BA_4342
BA_4338	-1.95472	1.42805	0.00311141	0.00852547	2.50704	down_regulated	hypothetical protein BA_4338
BA_4330	3.12896	5.4223	1.76e-11	2.72e-10	10.7548	up_regulated	hypothetical protein BA_4330
BA_4329	3.63625	2.40895	9.78e-11	1.34e-09	10.0098	up_regulated	hypothetical protein BA_4329
BA_4328	0.278881	3.58718	0.584784	0.677763	0.233005	no_significant	hypothetical protein BA_4328
BA_4324	-0.455982	1.61356	0.395157	0.500159	0.403231	no_significant	hypothetical protein BA_4324
BA_4323	-0.135629	-1.20117	1	1	0	no_significant	hypothetical protein BA_4323
BA_4304	-5.52675	1.62783	2.56e-11	3.83e-10	10.592	down_regulated	hypothetical protein BA_4304
BA_4301	-4.06664	2.04358	1.01e-09	1.13e-08	8.99675	down_regulated	hypothetical protein BA_4301
BA_4300	3.65092	1.61961	7.89e-10	9.04e-09	9.10313	up_regulated	hypothetical protein BA_4300
BA_4284	-1.12249	3.09728	0.0339912	0.0664653	1.46863	no_significant	hypothetical protein BA_4284
BA_4280	2.73602	0.552045	0.0017277	0.00514638	2.76253	up_regulated	hypothetical protein BA_4280
BA_4266	-2.79559	4.46946	4.3e-06	2.48e-05	5.36649	down_regulated	hypothetical protein BA_4266
BA_4265	4.61196	1.18488	2.43e-08	2.15e-07	7.61432	up_regulated	hypothetical protein BA_4265
BA_4260	3.8399	1.08749	4.72e-06	2.7e-05	5.32616	up_regulated	hypothetical protein BA_4260
BA_4259	6.12528	6.56306	2.41e-22	1.66e-20	21.6186	up_regulated	hypothetical protein BA_4259
BA_4247	1.7452	0.813504	0.00114035	0.00357668	2.94296	up_regulated	hypothetical protein BA_4247
BA_4245	2.20014	0.460539	0.000818927	0.00267839	3.08675	up_regulated	hypothetical protein BA_4245
BA_4242	3.05957	-1.34358	0.0173673	0.0373583	1.76027	no_significant	hypothetical protein BA_4242
BA_4239	-0.21762	1.78824	0.691444	0.773461	0.160243	no_significant	hypothetical protein BA_4239
BA_4238	-2.56246	-1.51466	0.0641648	0.113632	1.1927	no_significant	hypothetical protein BA_4238
BA_4233	0.97211	4.25274	0.0269911	0.054658	1.56878	no_significant	hypothetical protein BA_4233
BA_4224	1.91475	3.39438	0.000270527	0.00100783	3.56779	up_regulated	hypothetical protein BA_4224
BA_4222	0.359696	0.327605	0.600203	0.690308	0.221702	no_significant	hypothetical protein BA_4222
BA_4217	2.73023	-0.260593	0.00110098	0.0034713	2.95822	up_regulated	hypothetical protein BA_4217
BA_4215	2.43542	1.96422	0.000800363	0.00262584	3.09671	up_regulated	hypothetical protein BA_4215
BA_4210	1.72303	2.85264	0.000108097	0.000450948	3.96619	up_regulated	hypothetical protein BA_4210
BA_4207	-2.86654	-0.569166	0.00669454	0.0165048	2.17428	no_significant	hypothetical protein BA_4207
BA_4203	3.50279	3.83418	2.72e-05	0.000131128	4.56516	up_regulated	hypothetical protein BA_4203
BA_4202	-3.34321	5.41304	6.8e-12	1.15e-10	11.1677	down_regulated	hypothetical protein BA_4202
BA_4198	-5.01083	1.18362	2.18e-08	1.97e-07	7.66142	down_regulated	hypothetical protein BA_4198
BA_4197	5.18255	-0.776444	1.06e-05	5.65e-05	4.97434	up_regulated	hypothetical protein BA_4197
BA_4196	0.449336	4.29213	0.47307	0.575733	0.325075	no_significant	hypothetical protein BA_4196
BA_4192	1.40505	-0.932902	0.116729	0.184019	0.93282	no_significant	hypothetical protein BA_4192
BA_4179	3.15414	0.855892	1.24e-05	6.52e-05	4.90682	up_regulated	hypothetical protein BA_4179
BA_4178	0.652977	1.46726	0.307882	0.406612	0.511616	no_significant	hypothetical protein BA_4178
BA_4177	2.09536	6.69446	2.96e-06	1.76e-05	5.52841	up_regulated	hypothetical protein BA_4177
BA_4175	-2.95787	-0.578047	0.00246244	0.00696974	2.60863	down_regulated	hypothetical protein BA_4175
BA_4174	1.33249	2.5167	0.0152833	0.0334104	1.81578	no_significant	hypothetical protein BA_4174
BA_4170	2.66772	4.81102	1.86e-05	9.36e-05	4.72998	up_regulated	hypothetical protein BA_4170
BA_4167	2.58287	0.61831	0.00204597	0.00597593	2.6891	up_regulated	hypothetical protein BA_4167
BA_4165	-1.23338	-0.952901	0.270434	0.365973	0.567939	no_significant	hypothetical protein BA_4165
BA_4164	2.75782	-0.644981	0.00613422	0.0153301	2.21224	no_significant	hypothetical protein BA_4164
BA_4163	0.481802	-1.76736	0.886894	0.928853	0.0521284	no_significant	hypothetical protein BA_4163
BA_4162	1.16799	0.365412	0.112606	0.179605	0.94844	no_significant	hypothetical protein BA_4162
BA_4161	-0.391409	3.43685	0.409516	0.514004	0.387729	no_significant	hypothetical protein BA_4161
BA_4160	-1.28016	1.25636	0.0227424	0.0474187	1.64316	no_significant	hypothetical protein BA_4160
BA_4159	0.869465	2.47673	0.0843855	0.141857	1.07373	no_significant	hypothetical protein BA_4159
BA_4148	2.54577	4.25335	5.79e-08	4.76e-07	7.23708	up_regulated	hypothetical protein BA_4148
BA_4147	0.872278	-0.12324	0.210014	0.296416	0.677751	no_significant	hypothetical protein BA_4147
BA_4142	1.869	2.82475	0.000250327	0.000949393	3.60149	up_regulated	hypothetical protein BA_4142
BA_4136	-1.07468	2.44809	0.0418649	0.079532	1.37815	no_significant	hypothetical protein BA_4136
BA_4135	-0.731936	4.02113	0.130504	0.202098	0.884377	no_significant	hypothetical protein BA_4135
BA_4133	-0.900174	-1.92173	0.599137	0.689878	0.222474	no_significant	hypothetical protein BA_4133
BA_4129	4.84763	3.47849	1.65e-15	4.81e-14	14.7831	up_regulated	hypothetical protein BA_4129
BA_4128	8.33627	-0.195903	5e-10	6.01e-09	9.30129	up_regulated	hypothetical protein BA_4128
BA_4110	-0.584441	-1.14562	0.574641	0.669142	0.240603	no_significant	hypothetical protein BA_4110
BA_4106	-1.73192	-0.569801	0.116527	0.183908	0.933572	no_significant	hypothetical protein BA_4106
BA_4093	0.373394	-1.03798	0.880872	0.924264	0.0550874	no_significant	hypothetical protein BA_4093
BA_4081	-5.40017	-1.80371	0.0394127	0.0756941	1.40436	no_significant	hypothetical protein BA_4081
BA_4080	-6.2266	-1.2545	0.00201756	0.00591762	2.69517	down_regulated	hypothetical protein BA_4080
BA_4079	-1.79986	-0.779261	0.178106	0.259288	0.749322	no_significant	hypothetical protein BA_4079
BA_4077	-2.14583	0.178239	0.0257534	0.0527356	1.58916	no_significant	hypothetical protein BA_4077
BA_4072	0.553326	-0.148369	0.420534	0.525012	0.376199	no_significant	hypothetical protein BA_4072
BA_4071	2.0068	-1.39695	0.0593379	0.106338	1.22667	no_significant	hypothetical protein BA_4071
BA_4066	2.80179	-0.331962	0.000848528	0.0027666	3.07133	up_regulated	hypothetical protein BA_4066
BA_4065	4.42174	1.55727	1.9e-07	1.4e-06	6.72198	up_regulated	hypothetical protein BA_4065
BA_4063	-2.00183	4.15747	6.07e-05	0.000272155	4.21685	down_regulated	hypothetical protein BA_4063
BA_4058	0.241644	0.447785	0.729862	0.807204	0.136759	no_significant	hypothetical protein BA_4058
BA_4041	-4.4037	-0.180394	3.84e-05	0.000180724	4.4155	down_regulated	hypothetical protein BA_4041
BA_4040	-3.60243	3.22039	7.32e-12	1.22e-10	11.1357	down_regulated	hypothetical protein BA_4040
BA_4039	-2.59093	-0.318048	0.012939	0.0290094	1.8881	no_significant	hypothetical protein BA_4039
BA_4037	0.621265	3.06154	0.144328	0.219229	0.840648	no_significant	hypothetical protein BA_4037
BA_4019	2.45432	0.159275	0.000354829	0.00128524	3.44998	up_regulated	hypothetical protein BA_4019
BA_4018	-1.1174	0.193464	0.149246	0.225234	0.826097	no_significant	hypothetical protein BA_4018
BA_4013	1.70013	4.27744	0.0074907	0.0181277	2.12548	no_significant	hypothetical protein BA_4013
BA_4011	-0.907856	1.25781	0.0938701	0.155013	1.02747	no_significant	hypothetical protein BA_4011
BA_4010	-1.23524	0.360454	0.25364	0.346705	0.595782	no_significant	hypothetical protein BA_4010
BA_3994	-1.03618	4.36392	0.0160768	0.0349815	1.7938	no_significant	hypothetical protein BA_3994
BA_3984	0.792173	2.91007	0.0907132	0.150628	1.04233	no_significant	hypothetical protein BA_3984
BA_3952	-0.510225	2.86423	0.255036	0.348387	0.593398	no_significant	hypothetical protein BA_3952
BA_3951	-2.89932	3.16746	1.04e-05	5.53e-05	4.98483	down_regulated	hypothetical protein BA_3951
BA_3949	2.14844	5.3915	1.25e-05	6.54e-05	4.90409	up_regulated	hypothetical protein BA_3949
BA_3943	-0.114687	0.2743	0.916193	0.947345	0.0380131	no_significant	hypothetical protein BA_3943
BA_3941	-5.60529	-1.68073	0.0267362	0.0543249	1.5729	no_significant	hypothetical protein BA_3941
BA_3931	-5.07657	-2.00349	0.0901485	0.150045	1.04504	no_significant	hypothetical protein BA_3931
BA_3920	-6.101	3.21938	3.91e-17	1.44e-15	16.4076	down_regulated	hypothetical protein BA_3920
BA_3919	-0.681336	2.57613	0.157396	0.234921	0.803006	no_significant	hypothetical protein BA_3919
BA_3918	-0.57425	3.7714	0.207314	0.293195	0.683372	no_significant	hypothetical protein BA_3918
BA_3913	-0.530398	-1.28035	0.582447	0.675799	0.234743	no_significant	hypothetical protein BA_3913
BA_3911	0.381593	2.91079	0.393275	0.498828	0.405304	no_significant	hypothetical protein BA_3911
BA_3907	1.41424	4.77523	0.0184418	0.0393938	1.7342	no_significant	hypothetical protein BA_3907
BA_3898	-0.598637	3.19185	0.18565	0.267999	0.731304	no_significant	hypothetical protein BA_3898
BA_3896	2.8656	-0.514958	0.00107181	0.00338772	2.96988	up_regulated	hypothetical protein BA_3896
BA_3894	0.32075	-1.24211	0.70288	0.783627	0.153119	no_significant	hypothetical protein BA_3894
BA_3887	0.247887	-0.229585	0.835542	0.891725	0.0780318	no_significant	hypothetical protein BA_3887
BA_3884	1.06913	0.70024	0.204448	0.289966	0.689417	no_significant	hypothetical protein BA_3884
BA_3883	-0.653719	-1.59584	0.766967	0.840287	0.115223	no_significant	hypothetical protein BA_3883
BA_3881	-4.9968	-2.02691	0.141439	0.21562	0.849429	no_significant	hypothetical protein BA_3881
BA_3874	-1.3529	9.95738	0.0106006	0.0243781	1.97467	no_significant	hypothetical protein BA_3874
BA_3873	-3.53482	2.45575	1.15e-09	1.27e-08	8.93912	down_regulated	hypothetical protein BA_3873
BA_3852	3.10763	5.9453	2.52e-08	2.22e-07	7.59814	up_regulated	hypothetical protein BA_3852
BA_3850	4.3392	3.98554	7.95e-13	1.64e-11	12.0994	up_regulated	hypothetical protein BA_3850
BA_3845	6.08891	2.24348	1.17e-13	2.7e-12	12.932	up_regulated	hypothetical protein BA_3845
BA_3844	-1.47982	0.718555	0.0173503	0.0373467	1.76069	no_significant	hypothetical protein BA_3844
BA_3841	1.38801	3.40904	0.00245101	0.00694674	2.61065	up_regulated	hypothetical protein BA_3841
BA_3838	0.902568	2.49948	0.152091	0.228707	0.817897	no_significant	hypothetical protein BA_3838
BA_3835	-0.810182	2.8484	0.079207	0.134931	1.10124	no_significant	hypothetical protein BA_3835
BA_3829	-2.38335	-0.154294	0.00692117	0.016974	2.15982	no_significant	hypothetical protein BA_3829
BA_3827	-3.35331	0.229734	9.48e-05	0.000402218	4.02333	down_regulated	hypothetical protein BA_3827
BA_3822	-1.03453	-1.75607	0.514031	0.615258	0.28901	no_significant	hypothetical protein BA_3822
BA_3821	-2.83025	0.299675	0.00472296	0.012217	2.32579	no_significant	hypothetical protein BA_3821
BA_3820	-5.6282	-1.65701	0.0219739	0.0460271	1.65809	no_significant	hypothetical protein BA_3820
BA_3819	-5.00847	0.35826	1.46e-06	9.18e-06	5.8358	down_regulated	hypothetical protein BA_3819
BA_3815	-5.5091	-1.7299	0.0383641	0.074052	1.41608	no_significant	hypothetical protein BA_3815
BA_3814	-1.96692	-0.675785	0.123386	0.19278	0.908732	no_significant	hypothetical protein BA_3814
BA_3812	3.66292	1.41266	8.42e-05	0.000362117	4.07468	up_regulated	hypothetical protein BA_3812
BA_3807	-0.907582	-0.381844	0.282465	0.378956	0.549035	no_significant	hypothetical protein BA_3807
BA_3805	3.29168	4.85561	2.04e-10	2.69e-09	9.69006	up_regulated	hypothetical protein BA_3805
BA_3804	4.98374	3.58664	4.92e-18	1.97e-16	17.3078	up_regulated	hypothetical protein BA_3804
BA_3802	0.356771	0.107701	0.672538	0.756942	0.172283	no_significant	hypothetical protein BA_3802
BA_3798	4.2629	0.42491	4.86e-06	2.76e-05	5.31297	up_regulated	hypothetical protein BA_3798
BA_3796	0.725452	-1.61681	0.558729	0.655695	0.252799	no_significant	hypothetical protein BA_3796
BA_3793	3.17842	-0.406848	0.000702955	0.00234096	3.15307	up_regulated	hypothetical protein BA_3793
BA_3792	-0.051269	6.68172	0.906719	0.941741	0.0425272	no_significant	hypothetical protein BA_3792
BA_3786	-5.86941	1.04047	1.12e-10	1.53e-09	9.9514	down_regulated	hypothetical protein BA_3786
BA_3784	-2.07249	-1.20498	0.0681185	0.119278	1.16674	no_significant	hypothetical protein BA_3784
BA_3770	-3.19394	-0.340137	0.00304857	0.00838605	2.5159	down_regulated	hypothetical protein BA_3770
BA_3766	3.33456	-0.430017	0.0039023	0.0103814	2.40868	no_significant	hypothetical protein BA_3766
BA_3764	2.4966	1.15299	0.000238308	0.000908724	3.62286	up_regulated	hypothetical protein BA_3764
BA_3763	-0.518723	-1.63959	0.798315	0.864509	0.0978256	no_significant	hypothetical protein BA_3763
BA_3760	3.29323	6.17585	2.83e-08	2.46e-07	7.54767	up_regulated	hypothetical protein BA_3760
BA_3759	3.40961	4.3648	1.9e-07	1.4e-06	6.72134	up_regulated	hypothetical protein BA_3759
BA_3756	1.44012	-0.800189	0.0789352	0.134741	1.10273	no_significant	hypothetical protein BA_3756
BA_3755	0.34023	0.729377	0.568717	0.664266	0.245104	no_significant	hypothetical protein BA_3755
BA_3752	1.51826	1.74806	0.00791062	0.0190017	2.10179	no_significant	hypothetical protein BA_3752
BA_3743	-0.319606	4.13252	0.463235	0.56688	0.334198	no_significant	hypothetical protein BA_3743
BA_3742	4.73873	7.49789	1.01e-22	7.73e-21	21.9951	up_regulated	hypothetical protein BA_3742
BA_3737	-0.69595	3.78612	0.139628	0.213554	0.855028	no_significant	hypothetical protein BA_3737
BA_3734	2.1182	7.36507	0.000330739	0.00120754	3.48051	up_regulated	hypothetical protein BA_3734
BA_3725	-0.959734	3.81216	0.0474466	0.0883401	1.3238	no_significant	hypothetical protein BA_3725
BA_3724	-4.55793	-2.27005	0.0974382	0.159589	1.01127	no_significant	hypothetical protein BA_3724
BA_3722	0.40263	-0.184452	0.548533	0.646073	0.260798	no_significant	hypothetical protein BA_3722
BA_3720	-0.324003	0.843375	0.709287	0.789736	0.149178	no_significant	hypothetical protein BA_3720
BA_3719	4.92506	5.30156	8.86e-21	4.78e-19	20.0527	up_regulated	hypothetical protein BA_3719
BA_3718	3.06969	1.43923	0.000306248	0.00113188	3.51393	up_regulated	hypothetical protein BA_3718
BA_3715	3.47508	0.569472	6.06e-07	4.12e-06	6.2175	up_regulated	hypothetical protein BA_3715
BA_3714	2.42103	0.832467	0.000966438	0.00309348	3.01483	up_regulated	hypothetical protein BA_3714
BA_3700	2.09857	0.132978	0.00329832	0.00897332	2.48171	up_regulated	hypothetical protein BA_3700
BA_3698	-1.86079	-0.835859	0.091856	0.152345	1.03689	no_significant	hypothetical protein BA_3698
BA_3697	0.558457	-0.126086	0.495602	0.598136	0.304867	no_significant	hypothetical protein BA_3697
BA_3696	0.0143629	-0.89032	1	1	0	no_significant	hypothetical protein BA_3696
BA_3693	1.50289	-0.767171	0.0792013	0.134931	1.10127	no_significant	hypothetical protein BA_3693
BA_3686	0.94274	2.37343	0.0416542	0.079275	1.38034	no_significant	hypothetical protein BA_3686
BA_3684	-0.751116	1.06693	0.150616	0.22657	0.82213	no_significant	hypothetical protein BA_3684
BA_3681	-3.74905	2.28348	1.07e-08	1.02e-07	7.96986	down_regulated	hypothetical protein BA_3681
BA_3680	-0.237794	4.0134	0.72915	0.807204	0.137183	no_significant	hypothetical protein BA_3680
BA_3666	3.10652	2.57998	2.91e-07	2.11e-06	6.53587	up_regulated	hypothetical protein BA_3666
BA_3659	-0.762651	4.47087	0.12799	0.198717	0.892824	no_significant	hypothetical protein BA_3659
BA_3648	-4.58468	-2.26015	0.0987394	0.161469	1.00551	no_significant	hypothetical protein BA_3648
BA_3641	-1.73821	-1.92247	0.368936	0.472781	0.433049	no_significant	hypothetical protein BA_3641
BA_3640	1.69332	-1.25456	0.229461	0.319574	0.639291	no_significant	hypothetical protein BA_3640
BA_3638	-11.6557	3.4035	2.11e-25	2.34e-23	24.6753	down_regulated	hypothetical protein BA_3638
BA_3637	-7.34205	6.35939	4.33e-20	2.12e-18	19.3633	down_regulated	hypothetical protein BA_3637
BA_3630	1.40765	4.70903	0.00561701	0.014232	2.25049	no_significant	hypothetical protein BA_3630
BA_3629	0.0521136	1.31979	0.915305	0.947051	0.0384341	no_significant	hypothetical protein BA_3629
BA_3618	0.796159	-0.371365	0.348319	0.449395	0.458023	no_significant	hypothetical protein BA_3618
BA_3613	-0.476732	-1.43167	0.784162	0.853347	0.105594	no_significant	hypothetical protein BA_3613
BA_3611	-6.40348	4.26605	1.77e-22	1.26e-20	21.7513	down_regulated	hypothetical protein BA_3611
BA_3605	-0.0275884	2.38948	0.976667	0.994881	0.0102535	no_significant	hypothetical protein BA_3605
BA_3603	-0.569236	-0.207406	0.462184	0.565758	0.335185	no_significant	hypothetical protein BA_3603
BA_3601	-1.6412	4.37098	0.00292704	0.00810475	2.53357	down_regulated	hypothetical protein BA_3601
BA_3595	-4.22901	1.26316	8.12e-09	7.96e-08	8.09027	down_regulated	hypothetical protein BA_3595
BA_3590	-0.837312	1.57051	0.160712	0.238601	0.793951	no_significant	hypothetical protein BA_3590
BA_3589	-5.29964	-1.85992	0.0490556	0.0908133	1.30931	no_significant	hypothetical protein BA_3589
BA_3581	-3.32374	3.12661	1.04e-07	8.02e-07	6.98418	down_regulated	hypothetical protein BA_3581
BA_3578	-0.997385	2.96034	0.0541004	0.0984623	1.2668	no_significant	hypothetical protein BA_3578
BA_3577	-2.19451	0.813847	0.00720902	0.0175571	2.14212	no_significant	hypothetical protein BA_3577
BA_3570	3.23603	5.49639	1.36e-07	1.02e-06	6.86732	up_regulated	hypothetical protein BA_3570
BA_3567	-2.01525	3.83496	0.000293928	0.00108826	3.53176	down_regulated	hypothetical protein BA_3567
BA_3563	3.88305	0.993088	1.29e-07	9.82e-07	6.88842	up_regulated	hypothetical protein BA_3563
BA_3562	-0.797078	-0.953504	0.499866	0.602244	0.301147	no_significant	hypothetical protein BA_3562
BA_3559	-5.20563	-1.92721	0.071199	0.12349	1.14753	no_significant	hypothetical protein BA_3559
BA_3550	-0.362892	-1.37852	0.90952	0.943389	0.0411875	no_significant	hypothetical protein BA_3550
BA_3547	0.384055	-0.257833	0.632827	0.721124	0.198715	no_significant	hypothetical protein BA_3547
BA_3541	-2.11539	6.3484	0.00663217	0.0164074	2.17834	no_significant	hypothetical protein BA_3541
BA_3540	-1.89908	7.7275	5.73e-05	0.000259109	4.2419	down_regulated	hypothetical protein BA_3540
BA_3539	-2.01515	4.84619	1.86e-05	9.35e-05	4.73154	down_regulated	hypothetical protein BA_3539
BA_3538	0.428235	4.72569	0.394023	0.499175	0.404478	no_significant	hypothetical protein BA_3538
BA_3537	0.738688	3.1949	0.13047	0.202098	0.88449	no_significant	hypothetical protein BA_3537
BA_3529	0.345503	9.28725	0.558497	0.655606	0.252979	no_significant	hypothetical protein BA_3529
BA_3525	0.300299	1.44581	0.660917	0.74666	0.179853	no_significant	hypothetical protein BA_3525
BA_3523	3.24973	-0.773836	0.000899807	0.00290675	3.04585	up_regulated	hypothetical protein BA_3523
BA_3519	3.42787	-1.39924	0.00999516	0.0231623	2.00021	no_significant	hypothetical protein BA_3519
BA_3513	-0.512618	-1.50734	0.586465	0.678963	0.231758	no_significant	hypothetical protein BA_3513
BA_3512	4.68502	2.43059	5.83e-11	8.25e-10	10.2347	up_regulated	hypothetical protein BA_3512
BA_3505	4.36854	-0.592289	2.78e-05	0.000133667	4.55633	up_regulated	hypothetical protein BA_3505
BA_3504	3.45838	-0.972904	0.00947617	0.0221181	2.02337	no_significant	hypothetical protein BA_3504
BA_3503	-0.104777	0.569678	0.905496	0.941498	0.0431136	no_significant	hypothetical protein BA_3503
BA_3498	0.460335	-0.373079	0.576423	0.670289	0.239259	no_significant	hypothetical protein BA_3498
[truncated: 2,205 more rows]

## Sheet: Δ-vs-A16R_up-re enrichment
Category	Term	Count	%	PValue	Genes	List Total	Pop Hits	Pop Total	Fold Enrichment	Bonferroni	Benjamini	FDR
GOTERM_BP_DIRECT	GO:0006355~regulation of transcription, DNA-templated	50	6.83995	0.000527058	1084426, 1087460, 1089029, 1087462, 1086216, 1084989, 1088685, 1089135, 1088359, 1084511, 1087420, 1088541, 1085423, 1087648, 1085931, 1087782, 1087851, 1086066, 1086976, 1088597, 1086356, 1086810, 1083761, 1085330, 1087912, 1084092, 1086206, 1086755, 1087630, 1086203, 1083782, 1086671, 1088195, 1088967, 1087967, 1087772, 1085777, 1085439, 1087517, 1087963, 1083892, 1084104, 1087653, 1089167, 108…	315	265	2660	1.59329	0.0833115	0.0833115	0.637886
GOTERM_BP_DIRECT	GO:0006526~arginine biosynthetic process	7	0.957592	0.00128232	1087579, 1085916, 1087577, 1087653, 1087574, 1087573, 1084039	315	12	2660	4.92593	0.190807	0.100448	1.54545
GOTERM_MF_DIRECT	GO:0005215~transporter activity	19	2.59918	0.000702327	1088705, 1088704, 1085619, 1086183, 1088706, 1084647, 1089094, 1084694, 1083980, 1084551, 1087282, 1085443, 1084064, 1088116, 1084723, 1086327, 1086271, 1088044, 1085403	303	70	2604	2.33267	0.124963	0.124963	0.869402
GOTERM_BP_DIRECT	GO:0006865~amino acid transport	12	1.64159	0.00260442	1087914, 1087610, 1088666, 1087608, 1088719, 1088150, 1087604, 1088556, 1088659, 1089224, 1084278, 1087153	315	37	2660	2.73874	0.349679	0.133619	3.11588
GOTERM_CC_DIRECT	GO:0016021~integral component of membrane	16	2.18878	0.0124907	1088664, 1087914, 1088241, 1083640, 1086429, 1085005, 1087115, 1087035, 1086290, 1088072, 1087239, 1085190, 1084114, 1084065, 1088962, 1083994	63	72	526	1.85538	0.15075	0.15075	7.98484
GOTERM_BP_DIRECT	GO:0006351~transcription, DNA-templated	10	1.36799	0.0046188	1084426, 1087648, 1088195, 1087851, 1089241, 1086206, 1086066, 1086203, 1087653, 1087206	315	29	2660	2.91188	0.534138	0.17384	5.46446
GOTERM_MF_DIRECT	GO:0003700~transcription factor activity, sequence-specific DNA binding	37	5.06156	0.00596338	1087460, 1087462, 1089029, 1086216, 1089135, 1084989, 1088359, 1084511, 1087420, 1088541, 1085423, 1087648, 1085931, 1087782, 1086066, 1086810, 1083761, 1084092, 1087912, 1086755, 1087630, 1083782, 1086671, 1088195, 1087967, 1085777, 1087517, 1085439, 1087963, 1083892, 1087653, 1084104, 1089167, 1084047, 1087206, 1088070, 1084180	303	206	2604	1.54359	0.679039	0.433465	7.16427
GOTERM_BP_DIRECT	GO:0006810~transport	37	5.06156	0.0179933	1083635, 1089215, 1083672, 1085619, 1086183, 1087063, 1087187, 1087564, 1085904, 1086749, 1083980, 1088955, 1087282, 1085443, 1085190, 1084723, 1084114, 1088044, 1085403, 1087914, 1088704, 1084647, 1089223, 1087570, 1084649, 1088198, 1084694, 1089094, 1085902, 1088888, 1084551, 1083891, 1084064, 1088116, 1086327, 1086271, 1086821	315	217	2660	1.43984	0.95001	0.450742	19.78
KEGG_PATHWAY	ban00220:Arginine biosynthesis	6	0.820793	0.0317612	1087579, 1085916, 1087577, 1087574, 1087573, 1084039	131	19	1324	3.19164	0.921906	0.720547	28.9852
COG_ONTOLOGY	Transcription	17	2.32558	0.0594502	1087460, 1087391, 1089029, 1084092, 1084989, 1088685, 1089135, 1084511, 1087420, 1085423, 1088967, 1086709, 1087517, 1085439, 1086066, 1083892, 1089167	102	96	897	1.55729	0.740343	0.740343	38.102
KEGG_PATHWAY	ban03010:Ribosome	16	2.18878	0.0221507	1088908, 1084481, 1086841, 1084478, 1086761, 1088284, 1086438, 1085269, 1085445, 1088001, 1086445, 1088084, 1086085, 1084887, 1083681, 1083974	131	89	1324	1.81697	0.829595	0.829595	21.1436
GOTERM_MF_DIRECT	GO:0015370~solute:sodium symporter activity	4	0.547196	0.0378623	1085902, 1088955, 1087187, 1086821	303	7	2604	4.91089	0.999347	0.84013	38.1041
GOTERM_MF_DIRECT	GO:0003677~DNA binding	23	3.14637	0.031993	1085881, 1086263, 1084426, 1087391, 1086206, 1086561, 1088614, 1087630, 1083785, 1087441, 1083782, 1084293, 1087627, 1086536, 1088195, 1087648, 1087851, 1086976, 1086066, 1087653, 1088708, 1086356, 1087206	303	127	2604	1.5564	0.997926	0.872463	33.2442
GOTERM_BP_DIRECT	GO:0009636~response to toxic substance	5	0.683995	0.0908269	1086261, 1084375, 1084422, 1084839, 1085041	315	15	2660	2.81481	1	0.927091	68.5197
KEGG_PATHWAY	ban01230:Biosynthesis of amino acids	20	2.73598	0.095477	1088628, 1086227, 1088627, 1087579, 1083931, 1085916, 1086577, 1087577, 1087574, 1087573, 1084317, 1087586, 1086379, 1088935, 1088777, 1087770, 1088890, 1084039, 1083992, 1087946	131	143	1324	1.41355	0.999639	0.928816	65.4979

## Sheet: Δ-vs-A16R_down-re enrichment
Category	Term	Count	%	PValue	Genes	List Total	Pop Hits	Pop Total	Fold Enrichment	Bonferroni	Benjamini	FDR
GOTERM_BP_DIRECT	GO:0030436~asexual sporulation	90	10.7784	1.81395e-24	1088909, 1087061, 1085178, 1085195, 1088715, 1087468, 1088254, 1084919, 1089256, 1084327, 1087491, 1088643, 1084921, 1084920, 1089250, 1084561, 1088444, 1085832, 1086995, 1087769, 1086029, 1089157, 1084076, 1086504, 1083937, 1084998, 1085188, 1088673, 1084413, 1088675, 1088366, 1083720, 1088264, 1085335, 1088157, 1083717, 1087778, 1088663, 1085206, 1086865, 1087743, 1089136, 1086254, 1087749, 108…	551	158	2660	2.74989	4.44418e-22	4.44418e-22	2.349e-21
GOTERM_MF_DIRECT	GO:0003735~structural constituent of ribosome	35	4.19162	4.13892e-12	1083956, 1084717, 1086413, 1083790, 1086133, 1085015, 1086419, 1086682, 1084742, 1086044, 1086331, 1084609, 1087005, 1085954, 1087068, 1087046, 1087066, 1086274, 1087436, 1086422, 1086393, 1087637, 1086851, 1087011, 1086033, 1086341, 1087012, 1086794, 1084693, 1087013, 1087325, 1086384, 1087270, 1087053, 1084559	486	57	2604	3.29002	1.32031e-09	1.32031e-09	5.5826e-09
GOTERM_MF_DIRECT	GO:0019843~rRNA binding	24	2.87425	3.81979e-10	1086274, 1087436, 1086422, 1086393, 1083790, 1087637, 1086419, 1086682, 1087011, 1086033, 1084742, 1087012, 1084693, 1084609, 1086331, 1087013, 1087325, 1087005, 1085954, 1086384, 1087270, 1087053, 1087039, 1087066	486	34	2604	3.78214	1.21851e-07	6.09256e-08	5.15217e-07
GOTERM_BP_DIRECT	GO:0006412~translation	36	4.31138	2.36232e-09	1083956, 1084717, 1086413, 1083790, 1086133, 1085015, 1086682, 1086419, 1084742, 1086044, 1086331, 1084609, 1087005, 1085954, 1087068, 1087046, 1087066, 1086274, 1088221, 1087436, 1086422, 1086393, 1087637, 1086851, 1087011, 1086033, 1086341, 1087012, 1086794, 1084693, 1087013, 1087325, 1086384, 1087270, 1087053, 1084559	551	65	2660	2.67374	5.78768e-07	2.89384e-07	3.05912e-06
GOTERM_BP_DIRECT	GO:0009847~spore germination	20	2.39521	4.09185e-07	1089126, 1088682, 1086759, 1089056, 1089136, 1089211, 1084413, 1086254, 1086764, 1088279, 1088470, 1086710, 1088157, 1085358, 1086708, 1088447, 1089012, 1084076, 1089157, 1084210	551	30	2660	3.21839	0.000100245	3.34162e-05	0.00052988
KEGG_PATHWAY	ban01200:Carbon metabolism	45	5.38922	4.52418e-05	1088569, 1085582, 1083838, 1084610, 1084342, 1088810, 1085584, 1084882, 1085564, 1088857, 1087338, 1087334, 1085248, 1085565, 1085246, 1087737, 1087106, 1088802, 1087739, 1089036, 1084704, 1084990, 1086751, 1088178, 1089249, 1087130, 1083832, 1084904, 1084905, 1084902, 1084903, 1085597, 1087841, 1085231, 1084372, 1084495, 1089146, 1083996, 1085271, 1084399, 1084066, 1087845, 1085275, 1085354, 108…	288	119	1324	1.73845	0.00428884	0.00428884	0.0497187
GOTERM_CC_DIRECT	GO:0005840~ribosome	22	2.63473	0.000138147	1086274, 1083956, 1084717, 1086422, 1086413, 1087637, 1085015, 1086419, 1087011, 1086341, 1086794, 1087012, 1084742, 1086044, 1086331, 1087013, 1087325, 1087005, 1085954, 1087068, 1087053, 1087046	132	41	526	2.13821	0.0045488	0.0045488	0.120518
GOTERM_MF_DIRECT	GO:0003690~double-stranded DNA binding	9	1.07784	4.3529e-05	1089102, 1085890, 1088715, 1085441, 1089233, 1084061, 1086029, 1088366, 1084914	486	10	2604	4.82222	0.0137901	0.00461799	0.0586964
KEGG_PATHWAY	ban01130:Biosynthesis of antibiotics	70	8.38323	0.000129132	1083943, 1086847, 1083838, 1084610, 1088810, 1087496, 1085564, 1088306, 1088857, 1086430, 1088122, 1085624, 1085565, 1087737, 1087106, 1087739, 1089036, 1084990, 1089249, 1087130, 1084904, 1084905, 1084902, 1084903, 1086908, 1085231, 1086447, 1087031, 1084495, 1085180, 1083996, 1085271, 1089146, 1085673, 1085275, 1084594, 1087589, 1088569, 1086286, 1085582, 1084342, 1085584, 1083858, 1084882, 108…	288	219	1324	1.46943	0.0121934	0.00611539	0.141851
KEGG_PATHWAY	ban00010:Glycolysis / Gluconeogenesis	23	2.75449	0.000516843	1086286, 1088802, 1089036, 1084990, 1085046, 1087130, 1084610, 1083832, 1084904, 1084905, 1084902, 1084903, 1088810, 1084882, 1084372, 1087338, 1088857, 1084495, 1089146, 1085271, 1087334, 1085275, 1084594	288	52	1324	2.03339	0.0479263	0.00815205	0.566652
KEGG_PATHWAY	ban00030:Pentose phosphate pathway	15	1.79641	0.000477728	1087477, 1088980, 1084990, 1085582, 1087130, 1085584, 1085597, 1085564, 1084495, 1084399, 1085271, 1085248, 1085565, 1085275, 1084594	288	27	1324	2.55401	0.0443801	0.00903791	0.523869
KEGG_PATHWAY	ban03010:Ribosome	34	4.07186	0.000426504	1083956, 1084717, 1086413, 1083790, 1086133, 1085015, 1086419, 1086682, 1084742, 1086044, 1086331, 1084609, 1087005, 1085954, 1087068, 1087046, 1087066, 1086274, 1087436, 1086422, 1086393, 1087637, 1087011, 1086033, 1086341, 1087012, 1086794, 1084693, 1087013, 1087325, 1086384, 1087270, 1087053, 1084559	288	89	1324	1.75624	0.0397163	0.0100805	0.467817
KEGG_PATHWAY	ban01120:Microbial metabolism in diverse environments	56	6.70659	0.000412516	1086847, 1083838, 1084610, 1088810, 1085564, 1087027, 1088857, 1085565, 1087737, 1089205, 1087739, 1089036, 1084704, 1084990, 1089249, 1087130, 1084904, 1084905, 1084902, 1084903, 1086487, 1086908, 1084754, 1084495, 1083996, 1085271, 1089146, 1084399, 1085275, 1084594, 1088569, 1086286, 1089088, 1085582, 1084342, 1083857, 1085584, 1084882, 1085050, 1087338, 1087334, 1085248, 1084703, 1085246, 108…	288	171	1324	1.50552	0.0384388	0.0129807	0.452506
KEGG_PATHWAY	ban01100:Metabolic pathways	162	19.4012	0.00125418	1087266, 1087061, 1086847, 1087465, 1088810, 1089198, 1085564, 1088306, 1086436, 1086430, 1088912, 1088122, 1085565, 1085624, 1085228, 1087106, 1087072, 1087273, 1086734, 1087130, 1087479, 1089249, 1086197, 1085575, 1086534, 1083716, 1085230, 1086447, 1085232, 1084754, 1085234, 1085235, 1085180, 1086440, 1086632, 1087589, 1086286, 1089088, 1085056, 1084342, 1084882, 1087999, 1085050, 1085240, 108…	288	636	1324	1.17099	0.112389	0.0147922	1.37
KEGG_PATHWAY	ban01110:Biosynthesis of secondary metabolites	90	10.7784	0.00119663	1086847, 1083838, 1084610, 1087524, 1088810, 1085728, 1085564, 1088306, 1088857, 1086430, 1088122, 1084507, 1086839, 1085624, 1085565, 1087737, 1087106, 1087739, 1087072, 1089036, 1084412, 1084411, 1084990, 1086734, 1089249, 1087479, 1087130, 1084904, 1086773, 1084905, 1084902, 1084903, 1085719, 1083716, 1086908, 1085231, 1086447, 1087031, 1084495, 1085180, 1083996, 1085271, 1089146, 1085673, 108…	288	317	1324	1.30521	0.107517	0.0161184	1.30751
GOTERM_MF_DIRECT	GO:0000049~tRNA binding	12	1.43713	0.000485507	1086341, 1084609, 1087273, 1087325, 1086422, 1085954, 1088737, 1086405, 1083929, 1086682, 1083936, 1087066	486	21	2604	3.06173	0.143511	0.0379882	0.652875
GOTERM_MF_DIRECT	GO:0005524~ATP binding	55	6.58683	0.000620138	1085460, 1087061, 1084964, 1084914, 1084960, 1084957, 1086432, 1085624, 1086377, 1085228, 1087217, 1083936, 1088221, 1089102, 1084412, 1087273, 1086405, 1086106, 1087130, 1088269, 1084905, 1085230, 1085924, 1085232, 1086967, 1087031, 1085234, 1083996, 1085673, 1085278, 1086632, 1086805, 1083920, 1088523, 1084636, 1088621, 1086762, 1086418, 1088271, 1087682, 1088737, 1088047, 1086759, 1086816, 108…	486	193	2604	1.5269	0.179536	0.0388042	0.833218
KEGG_PATHWAY	ban00051:Fructose and mannose metabolism	9	1.07784	0.0039037	1084990, 1085365, 1089088, 1085271, 1087130, 1084904, 1085248, 1085275, 1084594	288	14	1324	2.95536	0.310354	0.0404457	4.20825
KEGG_PATHWAY	ban03440:Homologous recombination	11	1.31737	0.00700746	1083876, 1088247, 1084005, 1086614, 1088835, 1086752, 1089003, 1087547, 1083984, 1085353, 1084960	288	21	1324	2.40807	0.487294	0.0646226	7.43855
KEGG_PATHWAY	ban00230:Purine metabolism	24	2.87425	0.00808419	1087477, 1084005, 1085481, 1087479, 1085313, 1086425, 1087547, 1084882, 1089198, 1084844, 1087210, 1087031, 1085697, 1085456, 1085688, 1086436, 1086462, 1089146, 1089003, 1086075, 1085673, 1083984, 1085624, 1085644	288	66	1324	1.67172	0.537505	0.067701	8.53584
KEGG_PATHWAY	ban00020:Citrate cycle (TCA cycle)	13	1.55689	0.0124208	1088569, 1087739, 1088802, 1089036, 1083838, 1084342, 1089249, 1083832, 1088810, 1084372, 1087338, 1088857, 1087334	288	29	1324	2.06082	0.694975	0.094209	12.8365
GOTERM_BP_DIRECT	GO:0006096~glycolytic process	12	1.43713	0.00202138	1084882, 1086286, 1084990, 1085365, 1084495, 1089146, 1087130, 1084904, 1085275, 1084905, 1084902, 1084903	551	22	2660	2.63323	0.390879	0.0943911	2.58623
GOTERM_BP_DIRECT	GO:0006086~acetyl-CoA biosynthetic process from pyruvate	6	0.718563	0.00185266	1088802, 1089036, 1088857, 1087338, 1083832, 1088810	551	6	2660	4.82759	0.365122	0.107368	2.37275
GOTERM_MF_DIRECT	GO:0051539~4 iron, 4 sulfur cluster binding	9	1.07784	0.00257449	1086870, 1085217, 1086037, 1086447, 1085086, 1088122, 1087549, 1084615, 1087855	486	15	2604	3.21481	0.560589	0.128076	3.41722
KEGG_PATHWAY	ban01053:Biosynthesis of siderophore group nonribosomal peptides	5	0.598802	0.0223981	1083816, 1083815, 1083894, 1083869, 1083858	288	6	1324	3.83102	0.883749	0.152563	22.042
GOTERM_CC_DIRECT	GO:0045262~plasma membrane proton-transporting ATP synthase complex, catalytic core F(1)	5	0.598802	0.0149623	1085230, 1085232, 1085234, 1085235, 1085228	132	5	526	3.98485	0.391943	0.152809	12.3296
GOTERM_CC_DIRECT	GO:0045261~proton-transporting ATP synthase complex, catalytic core F(1)	5	0.598802	0.0149623	1085230, 1085232, 1085234, 1085235, 1085228	132	5	526	3.98485	0.391943	0.152809	12.3296
GOTERM_CC_DIRECT	GO:0015934~large ribosomal subunit	6	0.718563	0.0121204	1086033, 1087436, 1087270, 1086393, 1084559, 1087066	132	7	526	3.41558	0.331299	0.182259	10.0971
KEGG_PATHWAY	ban00523:Polyketide sugar unit biosynthesis	4	0.479042	0.033893	1087496, 1084219, 1087655, 1085406	288	4	1324	4.59722	0.962208	0.208619	31.5464
GOTERM_MF_DIRECT	GO:0046872~metal ion binding	19	2.27545	0.00532911	1086870, 1086806, 1086817, 1088835, 1084269, 1087130, 1086726, 1085045, 1084615, 1085325, 1084870, 1086037, 1086447, 1087031, 1085180, 1089001, 1085278, 1086632, 1087855	486	53	2604	1.9208	0.818143	0.216124	6.95359
GOTERM_BP_DIRECT	GO:0006265~DNA topological change	8	0.958084	0.00832053	1083944, 1085890, 1088715, 1085441, 1084061, 1086029, 1088366, 1086238	551	13	2660	2.97082	0.870886	0.253558	10.2551
GOTERM_MF_DIRECT	GO:0005525~GTP binding	11	1.31737	0.00733604	1087409, 1086852, 1086534, 1086560, 1087644, 1086334, 1085481, 1084269, 1086726, 1088334, 1086325	486	24	2604	2.45576	0.904518	0.254427	9.45416
KEGG_PATHWAY	ban00620:Pyruvate metabolism	18	2.15569	0.0484097	1087737, 1088569, 1086286, 1087739, 1088802, 1089036, 1088702, 1086751, 1083832, 1088810, 1084882, 1084372, 1087338, 1088857, 1089146, 1083996, 1087334, 1085354	288	53	1324	1.56132	0.991031	0.269674	42.0409
GOTERM_BP_DIRECT	GO:0030435~sporulation resulting in formation of a cellular spore	14	1.67665	0.00774004	1085719, 1087755, 1086623, 1089136, 1084512, 1089233, 1089256, 1086822, 1084170, 1083937, 1084903, 1088335, 1087217, 1086079	551	32	2660	2.11207	0.850982	0.271874	9.57241
GOTERM_CC_DIRECT	GO:0045250~cytosolic pyruvate dehydrogenase complex	4	0.479042	0.0495809	1088802, 1089036, 1088857, 1088810	132	4	526	3.98485	0.813276	0.342645	35.8447
KEGG_PATHWAY	ban00680:Methane metabolism	11	1.31737	0.0763886	1084990, 1086751, 1085271, 1084610, 1087130, 1085275, 1084902, 1085246, 1085354, 1084594, 1084903	288	29	1324	1.74377	0.999473	0.358575	58.25
KEGG_PATHWAY	ban00521:Streptomycin biosynthesis	5	0.598802	0.0723643	1087496, 1087326, 1084219, 1087655, 1085406	288	8	1324	2.87326	0.999204	0.359818	56.2063
GOTERM_CC_DIRECT	GO:0015935~small ribosomal subunit	5	0.598802	0.0683648	1084693, 1084609, 1086384, 1083790, 1086682	132	7	526	2.84632	0.903369	0.373353	46.1033
GOTERM_MF_DIRECT	GO:0046933~proton-transporting ATP synthase activity, rotational mechanism	7	0.838323	0.0135416	1085242, 1085230, 1085240, 1085232, 1085234, 1085235, 1085228	486	12	2604	3.12551	0.987084	0.383228	16.798
GOTERM_BP_DIRECT	GO:0015986~ATP synthesis coupled proton transport	7	0.838323	0.0224755	1085242, 1085230, 1085240, 1085232, 1085234, 1085235, 1085228	551	12	2660	2.81609	0.996187	0.501506	25.4999
COG_ONTOLOGY	Transcription / DNA replication, recombination, and repair	3	0.359281	0.0723766	1083701, 1085116, 1087843	149	3	897	6.02013	0.895009	0.528245	47.27
GOTERM_BP_DIRECT	GO:0019305~dTDP-rhamnose biosynthetic process	4	0.479042	0.0297703	1087496, 1084219, 1087655, 1085406	551	4	2660	4.82759	0.999391	0.560766	32.3871
COG_ONTOLOGY	Energy production and conversion	12	1.43713	0.0294588	1084541, 1088802, 1085871, 1085758, 1083855, 1087338, 1085083, 1083832, 1084142, 1083741, 1088810, 1087855	149	37	897	1.95248	0.592227	0.592227	22.4862
GOTERM_BP_DIRECT	GO:0006259~DNA metabolic process	5	0.598802	0.0371691	1084658, 1089102, 1087939, 1083920, 1088968	551	7	2660	3.44828	0.999907	0.604656	38.768
GOTERM_BP_DIRECT	GO:0042254~ribosome biogenesis	5	0.598802	0.0371691	1086852, 1086393, 1086413, 1086325, 1086247	551	7	2660	3.44828	0.999907	0.604656	38.768
GOTERM_MF_DIRECT	GO:0003924~GTPase activity	7	0.838323	0.0315032	1086852, 1086560, 1087644, 1086334, 1086726, 1088334, 1086325	486	14	2604	2.67901	0.999963	0.639809	35.0632
COG_ONTOLOGY	Carbohydrate transport and metabolism	8	0.958084	0.0690559	1088980, 1088171, 1085365, 1085046, 1089021, 1088545, 1088347, 1084594	149	23	897	2.09396	0.883128	0.658135	45.6402
GOTERM_MF_DIRECT	GO:0000287~magnesium ion binding	15	1.79641	0.041837	1086852, 1087477, 1086857, 1085481, 1086405, 1086751, 1085313, 1084902, 1085050, 1087293, 1084957, 1086430, 1086839, 1083929, 1083936	486	47	2604	1.71001	0.999999	0.710438	43.8108
GOTERM_BP_DIRECT	GO:0005975~carbohydrate metabolic process	14	1.67665	0.0639372	1086778, 1084432, 1088523, 1086773, 1083741, 1085036, 1085564, 1083803, 1084957, 1085682, 1087399, 1084399, 1085565, 1088103	551	41	2660	1.64844	1	0.712122	57.498
GOTERM_BP_DIRECT	GO:0009243~O antigen biosynthetic process	4	0.479042	0.0630709	1087496, 1084219, 1087655, 1085406	551	5	2660	3.86207	1	0.735549	56.9858
GOTERM_BP_DIRECT	GO:0019290~siderophore biosynthetic process	4	0.479042	0.0630709	1083942, 1083815, 1083894, 1083869	551	5	2660	3.86207	1	0.735549	56.9858
GOTERM_BP_DIRECT	GO:0008616~queuosine biosynthetic process	4	0.479042	0.0630709	1084870, 1083924, 1084883, 1087855	551	5	2660	3.86207	1	0.735549	56.9858
GOTERM_BP_DIRECT	GO:0006139~nucleobase-containing compound metabolic process	4	0.479042	0.0630709	1087477, 1087465, 1087479, 1086440	551	5	2660	3.86207	1	0.735549	56.9858
GOTERM_BP_DIRECT	GO:0006189~'de novo' IMP biosynthetic process	4	0.479042	0.0630709	1085697, 1085313, 1085673, 1085624	551	5	2660	3.86207	1	0.735549	56.9858
GOTERM_BP_DIRECT	GO:0006979~response to oxidative stress	5	0.598802	0.0624148	1085231, 1084237, 1088178, 1087798, 1085391	551	8	2660	3.01724	1	0.761986	56.5941
GOTERM_BP_DIRECT	GO:0009152~purine ribonucleotide biosynthetic process	7	0.838323	0.092692	1085688, 1085697, 1085481, 1085313, 1085673, 1085624, 1085644	551	16	2660	2.11207	1	0.817733	71.6248
GOTERM_MF_DIRECT	GO:0008483~transaminase activity	7	0.838323	0.0791461	1084754, 1088912, 1083709, 1089109, 1084507, 1087845, 1086785	486	17	2604	2.20625	1	0.888295	67.1147
GOTERM_MF_DIRECT	GO:0016887~ATPase activity	7	0.838323	0.0791461	1083686, 1086805, 1083920, 1083748, 1086432, 1084914, 1087217	486	17	2604	2.20625	1	0.888295	67.1147
GOTERM_MF_DIRECT	GO:0046961~proton-transporting ATPase activity, rotational mechanism	3	0.359281	0.0910376	1085232, 1085234, 1085228	486	3	2604	5.35802	1	0.903887	72.4029
GOTERM_MF_DIRECT	GO:0016616~oxidoreductase activity, acting on the CH-OH group of donors, NAD or NADP as acceptor	3	0.359281	0.0910376	1086817, 1085180, 1086734	486	3	2604	5.35802	1	0.903887	72.4029
