# Supplementary material for: Disruption of Protein BA_3317 Affects Asymmetric Division as an Exporter of Sporulation Signal Molecules in Bacillus anthracis
Source: Research Square preprint supplement (doi:10.21203/rs.3.rs-8551494/v1), 2026-01-28
Supplement: Supplementary file 2 [file 2f8461080bd90df8eb65338d.xlsx]

## Sheet: T-2
In vitro promoter pull-down proteins list at T-2
Accession	Description	Exp. q-value	Sum PEP Score	Coverage	# Peptides	# PSMs	# Unique Peptides	# Protein Groups	# AAs	MW [kDa]	calc. pI	emPAI	Score Sequest HT
BA_3858	hup-3 DNA-binding protein HU 3530483:3530755 forward MW:9729	0	19.9999	40	4	8	3	1	90	9.723	9.13	30.623	20.3037
Annotated Sequence	Modifications	Modifications in Master Proteins	Qvality PEP	Qvality q-value	# Protein Groups	# Proteins	# PSMs	Master Protein Accessions	Positions in Master Proteins	# Missed Cleavages	Theo. MH+ [Da]	Confidence Sequest HT	Percolator q-Value Sequest HT
[R].NPQTGEEMQIAASK.[V]			2.10404e-05	0	1	1	2	BA_3858	BA_3858 [62-75]	0	1503.71	High	0
[K].NVAQNAEISQK.[E]			0.000721069	0	1	1	2	BA_3858	BA_3858 [9-19]	0	1201.62	High	0
[R].TGRNPQTGEEMQIAASK.[V]			1.21888e-05	0	1	1	2	BA_3858	BA_3858 [59-75]	1	1817.88	High	0
[R].TGRNPQTGEEMQIAASK.[V]	1xOxidation [M11]		0.109618	0.00396762	1	1	1	BA_3858	BA_3858 [59-75]	1	1833.88	High	0.003185
[-].MNKTELIK.[N]	1xOxidation [M1]		0.160445	0.00396762	2	2	1	BA_2377; BA_3858	BA_2377 [1-8]; BA_3858 [1-8]	1	992.544	High	0.003185
BA_0047	spoVG regulatory protein SpoVG 50523:50816 forward MW:10934	0	23.5342	40.2062	6	21	6	1	97	10.928	5.26	16.783	45.4753
Annotated Sequence	Modifications	Modifications in Master Proteins	Qvality PEP	Qvality q-value	# Protein Groups	# Proteins	# PSMs	Master Protein Accessions	Positions in Master Proteins	# Missed Cleavages	Theo. MH+ [Da]	Confidence Sequest HT	Percolator q-Value Sequest HT
[R].TPDGEFR.[D]			0.0421946	0	1	1	3	BA_0047	BA_0047 [52-58]	0	821.379	High	0.003185
[K].IQDAVLTEYHR.[L]			0.000284853	0	1	1	3	BA_0047	BA_0047 [72-82]	0	1344.69	High	0
[R].SKIQDAVLTEYHR.[L]			0.000518563	0	1	1	1	BA_0047	BA_0047 [70-82]	1	1559.82	High	0
[K].RTPDGEFR.[D]			0.0905728	0	1	1	1	BA_0047	BA_0047 [51-58]	1	977.48	High	0
[-].MEVTDVR.[L]	1xOxidation [M1]		0.0650399	0	1	1	1	BA_0047	BA_0047 [1-7]	0	865.408	High	0
[-].MEVTDVR.[L]			0.0440067	0	1	1	4	BA_0047	BA_0047 [1-7]	0	849.413	High	0.003185
[R].DIAHPINSGTR.[S]			0.000863958	0	1	1	7	BA_0047	BA_0047 [59-69]	0	1180.61	High	0
[R].DIAHPINSGTR.[S]	1xDeamidated [N7]		0.00941576	0	1	1	1	BA_0047	BA_0047 [59-69]	0	1181.59	High	0
BA_1531	hup-1 DNA-binding protein HU 1447107:1447379 forward MW:9642	0	19.1613	27.7778	4	8	4	1	90	9.636	9.31	14.849	17.9597
Annotated Sequence	Modifications	Modifications in Master Proteins	Qvality PEP	Qvality q-value	# Protein Groups	# Proteins	# PSMs	Master Protein Accessions	Positions in Master Proteins	# Missed Cleavages	Theo. MH+ [Da]	Confidence Sequest HT	Percolator q-Value Sequest HT
[K].GRNPQTGEEIEIAASK.[V]			3.10238e-06	0	1	1	2	BA_1531	BA_1531 [60-75]	1	1699.86	High	0
[R].NPQTGEEIEIAASK.[V]			0.000678899	0	1	1	1	BA_1531	BA_1531 [62-75]	0	1486.74	High	0
[R].KGRNPQTGEEIEIAASK.[V]			0.0344211	0	1	1	2	BA_1531	BA_1531 [59-75]	2	1827.96	High	0
[K].VPAFKPGK.[A]			0.0157289	0	1	1	3	BA_1531	BA_1531 [76-83]	0	843.509	High	0
BA_1012	BA_1012 3'-5' exoribonuclease YhaM 1003757:1004701 forward MW:35500	0	43.0791	33.758	13	45	13	1	314	35.478	6.29	6.197	69.0591
Annotated Sequence	Modifications	Modifications in Master Proteins	Qvality PEP	Qvality q-value	# Protein Groups	# Proteins	# PSMs	Master Protein Accessions	Positions in Master Proteins	# Missed Cleavages	Theo. MH+ [Da]	Confidence Sequest HT	Percolator q-Value Sequest HT
[K].APVKKEDMVEK.[I]			5.77864e-05	0	1	1	6	BA_1012	BA_1012 [105-115]	2	1273.68	High	0
[K].HQNEFLDYPAATK.[N]			9.58297e-07	0	1	1	4	BA_1012	BA_1012 [139-151]	0	1533.73	High	0
[K].VAGDILNYK.[G]			0.00176794	0	1	1	2	BA_1012	BA_1012 [69-77]	0	992.541	High	0
[K].LWDVSPEVEK.[Q]			0.00185789	0	1	1	2	BA_1012	BA_1012 [50-59]	0	1201.61	High	0
[R].SFYKPSFHN.[-]			0.0164688	0	1	1	1	BA_1012	BA_1012 [306-314]	0	1126.53	High	0
[K].AEWGSPKPPLVK.[E]			5.69728e-05	0	1	1	2	BA_1012	BA_1012 [254-265]	0	1308.73	High	0
[K].QYVAETIVK.[V]			0.00360476	0	1	1	2	BA_1012	BA_1012 [60-68]	0	1050.58	High	0
[R].VFALDNR.[S]			0.0860312	0	1	1	3	BA_1012	BA_1012 [299-305]	0	834.447	High	0.003185
[K].ITQYIFEMR.[N]			0.00445886	0	1	1	1	BA_1012	BA_1012 [116-124]	0	1200.61	High	0
[K].MNMMDR.[A]	1xOxidation [M]		0.0778601	0	1	1	14	BA_1012	BA_1012 [280-285]	0	813.305	High	0.003185
[K].MNMMDR.[A]	1xDeamidated [N2]		0.198121	0.00396762	1	1	1	BA_1012	BA_1012 [280-285]	0	798.294	High	0.003185
[K].MNMMDR.[A]			0.103823	0.00396762	1	1	2	BA_1012	BA_1012 [280-285]	0	797.31	High	0.005998
[R].TKPGEYTER.[V]			0.176972	0.00396762	1	1	3	BA_1012	BA_1012 [290-298]	0	1080.53	High	0.003185
[K].KEDMVEK.[I]			0.156277	0.00396762	1	1	1	BA_1012	BA_1012 [109-115]	1	878.429	High	0.003185
[K].VAGDILNYKGR.[I]			0.217245	0.00751576	1	1	1	BA_1012	BA_1012 [69-79]	1	1205.66	High	0.005998
BA_2377	hup-2 DNA-binding protein HU 2216729:2217001 reverse MW:9591	0	4.69379	40	3	3	2	1	90	9.586	9.13	4.623	6.63571
Annotated Sequence	Modifications	Modifications in Master Proteins	Qvality PEP	Qvality q-value	# Protein Groups	# Proteins	# PSMs	Master Protein Accessions	Positions in Master Proteins	# Missed Cleavages	Theo. MH+ [Da]	Confidence Sequest HT	Percolator q-Value Sequest HT
[R].TGRNPQTGEEIQIAAGK.[V]			0.00989426	0	1	1	1	BA_2377	BA_2377 [59-75]	1	1769.91	High	0
[K].NVAQSADISQK.[D]			0.0485372	0	1	1	1	BA_2377	BA_2377 [9-19]	0	1160.59	High	0
[-].MNKTELIK.[N]	1xOxidation [M1]		0.160445	0.00396762	2	2	1	BA_2377; BA_3858	BA_2377 [1-8]; BA_3858 [1-8]	1	992.544	High	0.003185
BA_3982	rpsP 30S ribosomal protein S16 3658251:3658523 reverse MW:10117	0	3.83264	26.6667	2	3	2	1	90	10.111	10.14	2.981	6.15124
Annotated Sequence	Modifications	Modifications in Master Proteins	Qvality PEP	Qvality q-value	# Protein Groups	# Proteins	# PSMs	Master Protein Accessions	Positions in Master Proteins	# Missed Cleavages	Theo. MH+ [Da]	Confidence Sequest HT	Percolator q-Value Sequest HT
[K].WLGNGAKPSDTVR.[N]			0.018311	0	1	1	1	BA_3982	BA_3982 [59-71]	0	1400.73	High	0
[R].NLFSNQGIMEK.[F]			0.158349	0.00396762	1	1	1	BA_3982	BA_3982 [72-82]	0	1280.63	High	0.003185
[K].WLGNGAKPSDTVR.[N]	1xDeamidated [N4]		0.155763	0.00396762	1	1	1	BA_3982	BA_3982 [59-71]	0	1401.71	High	0.003185
BA_5395	uvrA excinuclease ABC subunit A 4884257:4887133 reverse MW:106453	0	61.6053	25.7829	26	34	26	1	958	106.385	6.52	2.3	73.5473
Annotated Sequence	Modifications	Modifications in Master Proteins	Qvality PEP	Qvality q-value	# Protein Groups	# Proteins	# PSMs	Master Protein Accessions	Positions in Master Proteins	# Missed Cleavages	Theo. MH+ [Da]	Confidence Sequest HT	Percolator q-Value Sequest HT
[K].LGQPATTLSGGEAQR.[V]			3.12956e-05	0	1	1	3	BA_5395	BA_5395 [823-837]	0	1485.77	High	0
[K].SKDFIVVK.[G]			0.0132729	0	1	1	1	BA_5395	BA_5395 [4-11]	1	935.556	High	0
[R].VLEYPER.[T]			0.0341799	0	1	1	2	BA_5395	BA_5395 [143-149]	0	905.473	High	0
[R].YNRETLEVK.[Y]			0.076265	0	1	1	1	BA_5395	BA_5395 [771-779]	1	1151.61	High	0
[R].DVFAQTNEAK.[V]			0.00253798	0	1	1	1	BA_5395	BA_5395 [713-722]	0	1122.54	High	0
[R].ETSSDYIR.[E]			0.0243737	0	1	1	1	BA_5395	BA_5395 [389-396]	0	970.448	High	0
[K].EFIPVPLER.[R]			0.034664	0	1	1	1	BA_5395	BA_5395 [598-606]	0	1099.61	High	0
[K].STMINEVLYK.[S]			0.00312829	0	1	1	1	BA_5395	BA_5395 [648-657]	0	1197.62	High	0
[K].STMINEVLYK.[S]	1xOxidation [M3]		0.00365623	0	1	1	1	BA_5395	BA_5395 [648-657]	0	1213.61	High	0
[R].YVESLSAYAR.[Q]			0.0147589	0	1	1	1	BA_5395	BA_5395 [57-66]	0	1158.58	High	0
[R].LLEVLQR.[L]			0.0621689	0	1	1	1	BA_5395	BA_5395 [871-877]	0	870.541	High	0
[R].LADSLESALK.[L]			0.00124469	0	1	1	1	BA_5395	BA_5395 [221-230]	0	1046.57	High	0
[K].VIDIDQSPIGR.[T]			0.0150222	0	1	1	1	BA_5395	BA_5395 [685-695]	0	1212.66	High	0
[R].NQLVVVTGLSGSGK.[S]			0.000558639	0	1	1	2	BA_5395	BA_5395 [28-41]	0	1358.76	High	0
[K].TADYIVDLGPEGGDK.[G]			0.00408082	0	1	1	1	BA_5395	BA_5395 [897-911]	0	1549.74	High	0
[K].GGQIVASGTPEQVVK.[E]			0.0845662	0	1	1	1	BA_5395	BA_5395 [912-926]	0	1469.8	High	0
[R].YVNEFGQVK.[E]			0.0174888	0	1	1	1	BA_5395	BA_5395 [362-370]	0	1083.55	High	0
[K].VLYGSGEEK.[V]			0.0197911	0	1	1	1	BA_5395	BA_5395 [349-357]	0	981.489	High	0
[K].YMAEQACPK.[C]	1xCarbamidomethyl [C7]		0.0110029	0	1	1	1	BA_5395	BA_5395 [402-410]	0	1097.48	High	0
[K].GLEHLDK.[V]			0.0704369	0	1	1	1	BA_5395	BA_5395 [678-684]	0	811.431	High	0
[K].YMAEQACPK.[C]	1xCarbamidomethyl [C7]; 1xOxidation [M2]		0.00110336	0	1	1	1	BA_5395	BA_5395 [402-410]	0	1113.47	High	0
[R].AAGTLSGGEAQR.[I]			0.00102059	0	1	1	2	BA_5395	BA_5395 [485-496]	0	1117.56	High	0
[R].KVEIVGAK.[E]			0.00513787	0	1	1	2	BA_5395	BA_5395 [613-620]	1	843.53	High	0
[R].LATQIGSR.[L]			0.0155629	0	1	1	1	BA_5395	BA_5395 [499-506]	0	845.484	High	0
[K].LASELHR.[R]			0.0736761	0	1	1	1	BA_5395	BA_5395 [840-846]	0	825.458	High	0
[K].VLEDIKK.[Q]			0.13641	0.00396762	1	1	1	BA_5395	BA_5395 [169-175]	1	844.514	High	0.003185
[R].YRETSSDYIR.[E]			0.10347	0.00396762	1	1	1	BA_5395	BA_5395 [387-396]	1	1289.61	High	0.003185
[R].CEACRGDGIIK.[I]	2xCarbamidomethyl [C1; C4]		0.188804	0.00396762	1	1	1	BA_5395	BA_5395 [740-750]	1	1278.59	High	0.003185
BA_0134	rpmJ 50S ribosomal protein L36 133216:133329 forward MW:4333	0.0175439	1.0826	24.3243	1	1	1	1	37	4.33	10.46	2.162	1.95331
Annotated Sequence	Modifications	Modifications in Master Proteins	Qvality PEP	Qvality q-value	# Protein Groups	# Proteins	# PSMs	Master Protein Accessions	Positions in Master Proteins	# Missed Cleavages	Theo. MH+ [Da]	Confidence Sequest HT	Percolator q-Value Sequest HT
[K].VMVICENPK.[H]	1xCarbamidomethyl [C5]		0.114937	0.00396762	1	1	1	BA_0134	BA_0134 [23-31]	0	1089.54	High	0.003185
BA_0102	rpoB DNA-directed RNA polymerase subunit beta 108391:111924 forward MW:131875	0	51.0127	18.0969	27	31	27	1	1177	131.791	5.1	1.408	52.1382
Annotated Sequence	Modifications	Modifications in Master Proteins	Qvality PEP	Qvality q-value	# Protein Groups	# Proteins	# PSMs	Master Protein Accessions	Positions in Master Proteins	# Missed Cleavages	Theo. MH+ [Da]	Confidence Sequest HT	Percolator q-Value Sequest HT
[R].ALMGANMQR.[Q]			0.00364329	0	1	1	1	BA_0102	BA_0102 [636-644]	0	991.481	High	0
[K].GVTELTAEER.[L]			0.00430362	0	1	1	1	BA_0102	BA_0102 [849-858]	0	1104.55	High	0
[K].LGPEEITR.[D]			0.0179269	0	1	1	2	BA_0102	BA_0102 [803-810]	0	914.494	High	0
[R].YVEVDGQTVK.[G]			0.014246	0	1	1	2	BA_0102	BA_0102 [694-703]	0	1137.58	High	0
[R].LRPGEPPTVENAK.[S]			0.00228195	0	1	1	2	BA_0102	BA_0102 [240-252]	0	1407.76	High	0
[K].IYAPESEGER.[V]			0.0449412	0	1	1	1	BA_0102	BA_0102 [349-358]	0	1150.54	High	0
[R].TGEPFDNR.[V]			0.03406	0	1	1	1	BA_0102	BA_0102 [1021-1028]	0	935.422	High	0
[R].FRGENIVTNK.[E]			0.0215416	0	1	1	1	BA_0102	BA_0102 [595-604]	1	1177.63	High	0
[R].RYVEVDGQTVK.[G]			0.0220028	0	1	1	1	BA_0102	BA_0102 [693-703]	1	1293.68	High	0
[K].TILYDGR.[T]			0.0606744	0	1	1	1	BA_0102	BA_0102 [1014-1020]	0	837.446	High	0
[K].MMSSDDTEIEMR.[D]			0.000103717	0	1	1	1	BA_0102	BA_0102 [1143-1154]	0	1444.58	High	0
[R].DIPNVGEDALR.[N]			0.0423428	0	1	1	1	BA_0102	BA_0102 [811-821]	0	1198.61	High	0
[R].YDLANVGR.[Y]			0.0118519	0	1	1	1	BA_0102	BA_0102 [265-272]	0	907.463	High	0
[K].DGDLLVGK.[V]			0.0687501	0	1	1	1	BA_0102	BA_0102 [837-844]	0	816.446	High	0
[R].DVHYSHYGR.[M]			0.00649145	0	1	1	2	BA_0102	BA_0102 [504-512]	0	1133.51	High	0
[K].YSVDECKER.[D]	1xCarbamidomethyl [C6]		0.0369273	0	1	1	1	BA_0102	BA_0102 [76-84]	1	1185.52	High	0
[R].GENIVTNK.[E]			0.0157846	0	1	1	1	BA_0102	BA_0102 [597-604]	0	874.463	High	0
[K].SDDVIGR.[V]			0.0558108	0	1	1	1	BA_0102	BA_0102 [1099-1105]	0	761.379	High	0
[K].GDLDRYK.[M]			0.0265264	0	1	1	1	BA_0102	BA_0102 [704-710]	1	866.437	High	0
[K].ERIDYMDVSPK.[Q]			0.116894	0.00396762	1	1	1	BA_0102	BA_0102 [605-615]	1	1352.65	High	0.003185
[K].ISEGDKMAGR.[H]			0.105602	0.00396762	1	1	1	BA_0102	BA_0102 [918-927]	1	1063.52	High	0.003185
[R].LINKETGEVK.[E]			0.171863	0.00396762	1	1	1	BA_0102	BA_0102 [98-107]	1	1130.64	High	0.003185
[K].TYEAIVK.[G]			0.153215	0.00396762	1	1	1	BA_0102	BA_0102 [1108-1114]	0	823.456	High	0.003185
[K].YSVDECK.[E]	1xCarbamidomethyl [C6]		0.133258	0.00396762	1	1	1	BA_0102	BA_0102 [76-82]	0	900.377	High	0.003185
[K].RYDLANVGR.[Y]			0.106683	0.00396762	1	1	1	BA_0102	BA_0102 [264-272]	1	1063.56	High	0.003185
[R].ILPYLEK.[N]			0.227014	0.00751576	1	1	1	BA_0102	BA_0102 [318-324]	0	875.524	High	0.005998
[K].ELQSLGMDVK.[M]			0.244594	0.00751576	1	1	1	BA_0102	BA_0102 [1133-1142]	0	1119.57	High	0.005998
BA_0105	rpsL 30S ribosomal protein S12 116050:116472 forward MW:15446	0	4.73787	15	3	3	3	1	140	15.437	11.14	1.154	6.98894
Annotated Sequence	Modifications	Modifications in Master Proteins	Qvality PEP	Qvality q-value	# Protein Groups	# Proteins	# PSMs	Master Protein Accessions	Positions in Master Proteins	# Missed Cleavages	Theo. MH+ [Da]	Confidence Sequest HT	Percolator q-Value Sequest HT
[K].STDISAPQKR.[G]			0.0704369	0	1	1	1	BA_0105	BA_0105 [35-44]	1	1102.59	High	0
[K].STDISAPQK.[R]			0.069228	0	1	1	1	BA_0105	BA_0105 [35-43]	0	946.484	High	0
[R].GALDTAGVDKR.[M]			0.014449	0	1	1	1	BA_0105	BA_0105 [113-123]	1	1102.59	High	0
BA_4303	BA_4303 MarR family transcriptional regulator 3930605:3931057 reverse MW:17733	0	3.32708	10	2	2	2	1	150	17.722	9.38	1.154	1.90703
Annotated Sequence	Modifications	Modifications in Master Proteins	Qvality PEP	Qvality q-value	# Protein Groups	# Proteins	# PSMs	Master Protein Accessions	Positions in Master Proteins	# Missed Cleavages	Theo. MH+ [Da]	Confidence Sequest HT	Percolator q-Value Sequest HT
[R].LLQNDINTR.[F]			0.00506556	0	1	1	1	BA_4303	BA_4303 [33-41]	0	1086.59	High	0
[R].KGFVER.[K]			0.234211	0.00751576	1	1	1	BA_4303	BA_4303 [89-94]	1	735.415	High	0.005998
BA_4547	rpsT 30S ribosomal protein S20 4136602:4136859 forward MW:9341	0	2.70686	11.7647	1	1	1	1	85	9.336	10.67	1.154	2.29378
Annotated Sequence	Modifications	Modifications in Master Proteins	Qvality PEP	Qvality q-value	# Protein Groups	# Proteins	# PSMs	Master Protein Accessions	Positions in Master Proteins	# Missed Cleavages	Theo. MH+ [Da]	Confidence Sequest HT	Percolator q-Value Sequest HT
[K].GLIHQNAAAR.[Q]			0.00400914	0	1	1	1	BA_4547	BA_4547 [65-74]	0	1050.58	High	0
BA_4534	rpsU 30S ribosomal protein S21 4122482:4122655 reverse MW:6772	0	2.44831	14.0351	1	1	1	1	57	6.769	11.09	1.154	2.24603
Annotated Sequence	Modifications	Modifications in Master Proteins	Qvality PEP	Qvality q-value	# Protein Groups	# Proteins	# PSMs	Master Protein Accessions	Positions in Master Proteins	# Missed Cleavages	Theo. MH+ [Da]	Confidence Sequest HT	Percolator q-Value Sequest HT
[K].TGTLAEAR.[K]			0.00684573	0	1	1	1	BA_4534	BA_4534 [26-33]	0	818.437	High	0
BA_0123	rpsN 30S ribosomal protein S14 127368:127553 forward MW:7263	0.0175439	0.96377	9.83607	1	1	1	1	61	7.259	10.37	1.154	0
Annotated Sequence	Modifications	Modifications in Master Proteins	Qvality PEP	Qvality q-value	# Protein Groups	# Proteins	# PSMs	Master Protein Accessions	Positions in Master Proteins	# Missed Cleavages	Theo. MH+ [Da]	Confidence Sequest HT	Percolator q-Value Sequest HT
[K].VQEYTR.[C]			0.146279	0.00396762	1	1	1	BA_0123	BA_0123 [18-23]	0	795.4	High	0.003185
BA_4818	rpmI 50S ribosomal protein L35 4380413:4380613 reverse MW:7495	0.0327869	0.758952	15.1515	1	1	1	1	66	7.491	11.93	1.154	0
Annotated Sequence	Modifications	Modifications in Master Proteins	Qvality PEP	Qvality q-value	# Protein Groups	# Proteins	# PSMs	Master Protein Accessions	Positions in Master Proteins	# Missed Cleavages	Theo. MH+ [Da]	Confidence Sequest HT	Percolator q-Value Sequest HT
[K].AGVVSAGDFK.[R]			0.222085	0.00751576	1	1	1	BA_4818	BA_4818 [47-56]	0	950.494	High	0.005998
BA_3965	rpsB 30S ribosomal protein S2 3642076:3642777 reverse MW:26517	0	6.76061	16.309	5	5	5	1	233	26.5	9.11	0.968	5.51665
Annotated Sequence	Modifications	Modifications in Master Proteins	Qvality PEP	Qvality q-value	# Protein Groups	# Proteins	# PSMs	Master Protein Accessions	Positions in Master Proteins	# Missed Cleavages	Theo. MH+ [Da]	Confidence Sequest HT	Percolator q-Value Sequest HT
[K].MADAILEAK.[Q]			0.00800033	0	1	1	1	BA_3965	BA_3965 [217-225]	0	961.502	High	0
[K].KVEEAFK.[V]			0.0851493	0	1	1	1	BA_3965	BA_3965 [49-55]	1	850.467	High	0
[R].IAVAEAR.[K]			0.0863271	0	1	1	1	BA_3965	BA_3965 [171-177]	0	729.425	High	0
[R].AGMYFVNQR.[W]			0.097648	0.00396762	1	1	1	BA_3965	BA_3965 [87-95]	0	1085.52	High	0.003185
[R].LKDIER.[M]			0.215878	0.00751576	1	1	1	BA_3965	BA_3965 [114-119]	1	773.452	High	0.005998
BA_3672	BA_3672 DNA polymerase III subunit epsilon 3376139:3377086 reverse MW:36227	0	11.3386	12.381	5	6	5	1	315	36.204	6.65	0.874	12.175
Annotated Sequence	Modifications	Modifications in Master Proteins	Qvality PEP	Qvality q-value	# Protein Groups	# Proteins	# PSMs	Master Protein Accessions	Positions in Master Proteins	# Missed Cleavages	Theo. MH+ [Da]	Confidence Sequest HT	Percolator q-Value Sequest HT
[K].IIQVAAVK.[Y]			0.0237792	0	1	1	1	BA_3672	BA_3672 [27-34]	0	841.551	High	0
[K].CASIEEEAKR.[K]	1xCarbamidomethyl [C1]		0.015508	0	1	1	2	BA_3672	BA_3672 [168-177]	1	1192.56	High	0
[K].RPIPDR.[I]			0.0120635	0	1	1	1	BA_3672	BA_3672 [52-57]	0	753.437	High	0
[K].QSEMNADEK.[L]			0.00561378	0	1	1	1	BA_3672	BA_3672 [298-306]	0	1051.44	High	0
[K].LETLKR.[M]			0.1631	0.00396762	1	1	1	BA_3672	BA_3672 [138-143]	1	759.472	High	0.003185
BA_0013	BA_0013 hypothetical protein 21869:22420 forward MW:20635	0	7.24872	17.4863	3	3	3	1	183	20.622	9.57	0.874	7.04797
Annotated Sequence	Modifications	Modifications in Master Proteins	Qvality PEP	Qvality q-value	# Protein Groups	# Proteins	# PSMs	Master Protein Accessions	Positions in Master Proteins	# Missed Cleavages	Theo. MH+ [Da]	Confidence Sequest HT	Percolator q-Value Sequest HT
[R].INAGKSESEIIAPTK.[K]			0.00689441	0	1	1	1	BA_0013	BA_0013 [167-181]	1	1557.85	High	0
[K].VLTAVINGK.[E]	1xDeamidated [N7]		0.00567377	0	1	1	1	BA_0013	BA_0013 [137-145]	0	915.551	High	0
[R].IISDDTFR.[K]			0.0100354	0	1	1	1	BA_0013	BA_0013 [91-98]	0	966.489	High	0
BA_4409	accB acetyl-CoA carboxylase biotin carboxyl carrier protein subunit 4022988:4023482 reverse MW:18024	0	3.8633	13.4146	2	2	2	1	164	18.013	4.91	0.778	4.00105
Annotated Sequence	Modifications	Modifications in Master Proteins	Qvality PEP	Qvality q-value	# Protein Groups	# Proteins	# PSMs	Master Protein Accessions	Positions in Master Proteins	# Missed Cleavages	Theo. MH+ [Da]	Confidence Sequest HT	Percolator q-Value Sequest HT
[R].GNEVVAVQAPVAK.[Q]			0.0385166	0	1	1	1	BA_4409	BA_4409 [37-49]	0	1281.72	High	0
[K].AVQNENLHK.[I]			0.0103603	0	1	1	1	BA_4409	BA_4409 [79-87]	0	1052.55	High	0
BA_0112	rplW 50S ribosomal protein L23 122586:122876 forward MW:11114	0	3.30734	15.625	2	2	2	1	96	11.107	9.99	0.778	1.99131
Annotated Sequence	Modifications	Modifications in Master Proteins	Qvality PEP	Qvality q-value	# Protein Groups	# Proteins	# PSMs	Master Protein Accessions	Positions in Master Proteins	# Missed Cleavages	Theo. MH+ [Da]	Confidence Sequest HT	Percolator q-Value Sequest HT
[R].SMEMMAEK.[K]			0.052232	0	1	1	1	BA_0112	BA_0112 [17-24]	0	956.389	High	0
[K].RPVITER.[S]			0.0241172	0	1	1	1	BA_0112	BA_0112 [10-16]	0	870.516	High	0
BA_3971	topA DNA topoisomerase I 3648303:3650381 reverse MW:79064	0	16.6088	12.5723	10	10	10	1	692	79.014	8.27	0.753	11.2053
Annotated Sequence	Modifications	Modifications in Master Proteins	Qvality PEP	Qvality q-value	# Protein Groups	# Proteins	# PSMs	Master Protein Accessions	Positions in Master Proteins	# Missed Cleavages	Theo. MH+ [Da]	Confidence Sequest HT	Percolator q-Value Sequest HT
[R].VVFNEITK.[D]			0.0158967	0	1	1	1	BA_3971	BA_3971 [108-115]	0	949.535	High	0
[R].VQSVAVR.[L]			0.0449412	0	1	1	1	BA_3971	BA_3971 [167-173]	0	758.452	High	0
[K].QHFTQPPPR.[Y]			0.0930874	0	1	1	1	BA_3971	BA_3971 [451-459]	0	1107.57	High	0
[K].VVASMGHVR.[D]			0.00282272	0	1	1	1	BA_3971	BA_3971 [27-35]	0	955.514	High	0
[K].ESFKHPR.[A]			0.0327675	0	1	1	1	BA_3971	BA_3971 [120-126]	1	900.469	High	0
[R].ISETAQTEAR.[T]			0.00128049	0	1	1	1	BA_3971	BA_3971 [306-315]	0	1105.55	High	0
[K].CEGMLVEKK.[L]	1xCarbamidomethyl [C1]		0.138242	0.00396762	1	1	1	BA_3971	BA_3971 [664-672]	1	1093.54	High	0.003185
[K].EIGVTCPK.[C]	1xCarbamidomethyl [C6]		0.105244	0.00396762	1	1	1	BA_3971	BA_3971 [614-621]	0	903.46	High	0.003185
[R].GYVGLDNKR.[F]			0.101379	0.00396762	1	1	1	BA_3971	BA_3971 [491-499]	1	1021.54	High	0.003185
[K].DNAFSVENVTR.[K]			0.225597	0.00751576	1	1	1	BA_3971	BA_3971 [233-243]	0	1251.6	High	0.005998
BA_0103	rpoC DNA-directed RNA polymerase subunit beta' 111962:115573 forward MW:134433	0	31.4356	12.8013	18	21	18	1	1203	134.347	8.57	0.708	29.741
Annotated Sequence	Modifications	Modifications in Master Proteins	Qvality PEP	Qvality q-value	# Protein Groups	# Proteins	# PSMs	Master Protein Accessions	Positions in Master Proteins	# Missed Cleavages	Theo. MH+ [Da]	Confidence Sequest HT	Percolator q-Value Sequest HT
[R].MQGVEIGDK.[H]			0.0287659	0	1	1	1	BA_0103	BA_0103 [1056-1064]	0	976.477	High	0
[K].ELTEGSIDPK.[E]			0.0230359	0	1	1	1	BA_0103	BA_0103 [1022-1031]	0	1088.55	High	0
[K].MYQCGLPK.[E]	1xCarbamidomethyl [C4]		0.0405981	0	1	1	2	BA_0103	BA_0103 [352-359]	0	996.464	High	0
[R].KGLADTALK.[T]			0.00173074	0	1	1	1	BA_0103	BA_0103 [785-793]	1	916.546	High	0
[K].SLSHMLK.[G]			0.0446276	0	1	1	1	BA_0103	BA_0103 [315-321]	0	815.444	High	0
[K].TADSGYLTR.[R]			0.00442737	0	1	1	1	BA_0103	BA_0103 [794-802]	0	983.479	High	0
[R].SVIVVGPNLK.[M]			0.0133671	0	1	1	1	BA_0103	BA_0103 [342-351]	0	1025.64	High	0
[R].EGAIGEGMVFK.[D]			0.0167033	0	1	1	1	BA_0103	BA_0103 [507-517]	0	1137.56	High	0
[K].NMLLLTTVGK.[L]			0.0167625	0	1	1	1	BA_0103	BA_0103 [555-564]	0	1089.63	High	0
[K].RDELLGLK.[E]			0.0689887	0	1	1	1	BA_0103	BA_0103 [1154-1161]	1	943.557	High	0
[K].KPETINYR.[T]			0.0147068	0	1	1	1	BA_0103	BA_0103 [30-37]	0	1020.55	High	0
[K].GLAHNIK.[S]			0.0513281	0	1	1	1	BA_0103	BA_0103 [378-384]	0	752.441	High	0
[R].CGVEVTR.[A]	1xCarbamidomethyl [C1]		0.0326524	0	1	1	1	BA_0103	BA_0103 [78-84]	0	820.398	High	0
[R].KVDLVK.[T]			0.174685	0.00396762	1	1	1	BA_0103	BA_0103 [1181-1186]	1	701.456	High	0.003185
[K].LVPAGTGMNR.[Y]	1xOxidation [M8]		0.162034	0.00396762	1	1	1	BA_0103	BA_0103 [1169-1178]	0	1031.53	High	0.003185
[K].LVPAGTGMNR.[Y]			0.189413	0.00396762	1	1	1	BA_0103	BA_0103 [1169-1178]	0	1015.54	High	0.003185
[R].GLMANPSGR.[I]	1xOxidation [M3]		0.125038	0.00396762	1	1	1	BA_0103	BA_0103 [749-757]	0	918.446	High	0.003185
[R].GLMANPSGR.[I]			0.135955	0.00396762	1	1	1	BA_0103	BA_0103 [749-757]	0	902.451	High	0.003185
[R].YKGVVCDR.[C]	1xCarbamidomethyl [C6]		0.205855	0.00396762	1	1	1	BA_0103	BA_0103 [70-77]	1	996.493	High	0.003185
[K].DWECHCGK.[Y]	2xCarbamidomethyl [C4; C6]		0.24384	0.00751576	1	1	1	BA_0103	BA_0103 [57-64]	0	1091.4	High	0.005998
BA_0137	rpoA DNA-directed RNA polymerase subunit alpha 134311:135255 forward MW:34936	0	6.78411	10.828	4	4	4	1	314	34.914	4.97	0.585	3.96664
Annotated Sequence	Modifications	Modifications in Master Proteins	Qvality PEP	Qvality q-value	# Protein Groups	# Proteins	# PSMs	Master Protein Accessions	Positions in Master Proteins	# Missed Cleavages	Theo. MH+ [Da]	Confidence Sequest HT	Percolator q-Value Sequest HT
[K].IETVELNEDAK.[Y]			0.00107251	0	1	1	1	BA_0137	BA_0137 [9-19]	0	1260.63	High	0
[R].GYTPADANK.[S]			0.0518686	0	1	1	1	BA_0137	BA_0137 [147-155]	0	936.442	High	0
[R].SYNCLKR.[A]	1xCarbamidomethyl [C4]		0.122129	0.00396762	1	1	1	BA_0137	BA_0137 [262-268]	1	940.467	High	0.003185
[R].VTYQVEK.[T]			0.161503	0.00396762	1	1	1	BA_0137	BA_0137 [176-182]	0	866.462	High	0.003185
BA_4858	BA_4858 thioesterase 4419865:4421178 reverse MW:48730	0	8.00794	9.15332	5	6	5	1	437	48.699	7.02	0.532	9.55315
Annotated Sequence	Modifications	Modifications in Master Proteins	Qvality PEP	Qvality q-value	# Protein Groups	# Proteins	# PSMs	Master Protein Accessions	Positions in Master Proteins	# Missed Cleavages	Theo. MH+ [Da]	Confidence Sequest HT	Percolator q-Value Sequest HT
[K].LQGIISR.[Q]			0.0413163	0	1	1	1	BA_4858	BA_4858 [293-299]	0	786.483	High	0
[R].YPIVDENKK.[V]			0.0056337	0	1	1	2	BA_4858	BA_4858 [225-233]	1	1105.59	High	0
[K].MSVAAAAR.[M]			0.0654928	0	1	1	1	BA_4858	BA_4858 [267-274]	0	776.408	High	0
[R].HPITVNGK.[M]	1xDeamidated [N6]		0.0492207	0	1	1	1	BA_4858	BA_4858 [259-266]	0	866.473	High	0
[K].VLGIVTSK.[D]			0.127154	0.00396762	1	1	1	BA_4858	BA_4858 [234-241]	0	816.519	High	0.003185
BA_5722	ssb-1 single-stranded DNA-binding protein 5213869:5214399 reverse MW:19160	0	3.50555	10.7955	2	2	2	1	176	19.148	5.66	0.52	4.04544
Annotated Sequence	Modifications	Modifications in Master Proteins	Qvality PEP	Qvality q-value	# Protein Groups	# Proteins	# PSMs	Master Protein Accessions	Positions in Master Proteins	# Missed Cleavages	Theo. MH+ [Da]	Confidence Sequest HT	Percolator q-Value Sequest HT
[K].KGSLAGVDGR.[L]			0.00797204	0	1	1	1	BA_5722	BA_5722 [70-79]	1	959.527	High	0
[R].AFANQQGER.[E]			0.104176	0.00396762	1	1	1	BA_5722	BA_5722 [39-47]	0	1020.49	High	0.003185
BA_4182	pdhC branched-chain alpha-keto acid dehydrogenase subunit E2 3828814:3830073 reverse MW:44869	0	10.5635	10.5012	5	5	5	1	419	44.842	5.76	0.487	8.70526
Annotated Sequence	Modifications	Modifications in Master Proteins	Qvality PEP	Qvality q-value	# Protein Groups	# Proteins	# PSMs	Master Protein Accessions	Positions in Master Proteins	# Missed Cleavages	Theo. MH+ [Da]	Confidence Sequest HT	Percolator q-Value Sequest HT
[K].AQPIPAGEYPETR.[E]			0.00116362	0	1	1	1	BA_4182	BA_4182 [179-191]	0	1428.71	High	0
[R].IAEKPVVK.[N]			0.0042581	0	1	1	1	BA_4182	BA_4182 [365-372]	0	883.561	High	0
[R].LAPAEMK.[G]			0.0937263	0	1	1	1	BA_4182	BA_4182 [325-331]	0	759.407	High	0
[R].LIDGATAQK.[A]			0.00852695	0	1	1	1	BA_4182	BA_4182 [392-400]	0	916.51	High	0
[K].ALNQIKR.[L]			0.12131	0.00396762	1	1	1	BA_4182	BA_4182 [401-407]	1	842.521	High	0.003185
BA_4508	nfo endonuclease IV 4101017:4101913 reverse MW:32909	0	4.94859	7.38255	3	3	3	1	298	32.888	6.68	0.468	4.38643
Annotated Sequence	Modifications	Modifications in Master Proteins	Qvality PEP	Qvality q-value	# Protein Groups	# Proteins	# PSMs	Master Protein Accessions	Positions in Master Proteins	# Missed Cleavages	Theo. MH+ [Da]	Confidence Sequest HT	Percolator q-Value Sequest HT
[K].ILETPYVGEDKK.[D]			0.0106579	0	1	1	1	BA_4508	BA_4508 [258-269]	1	1391.74	High	0
[R].LQVLHINDSK.[N]			0.0331151	0	1	1	1	BA_4508	BA_4508 [211-220]	0	1166.65	High	0
[K].ILETPYVGEDK.[K]			0.129304	0.00396762	1	1	1	BA_4508	BA_4508 [258-268]	0	1263.65	High	0.003185
BA_0044	purR pur operon repressor 49025:49873 forward MW:31053	0	5.37301	9.57447	3	3	3	1	282	31.033	5.16	0.438	3.99757
Annotated Sequence	Modifications	Modifications in Master Proteins	Qvality PEP	Qvality q-value	# Protein Groups	# Proteins	# PSMs	Master Protein Accessions	Positions in Master Proteins	# Missed Cleavages	Theo. MH+ [Da]	Confidence Sequest HT	Percolator q-Value Sequest HT
[R].IQTMTLAK.[R]			0.0191717	0	1	1	1	BA_0044	BA_0044 [183-190]	0	905.512	High	0
[R].LSEVDVK.[E]			0.0800367	0	1	1	1	BA_0044	BA_0044 [252-258]	0	789.435	High	0
[R].QPIDAVMTVATK.[G]	1xOxidation [M7]		0.012366	0	1	1	1	BA_0044	BA_0044 [129-140]	0	1289.68	High	0
BA_4385	bfmbC dihydrolipoamide dehydrogenase 3998696:4000117 reverse MW:50775	0	5.7638	9.09091	4	4	4	1	473	50.742	5.78	0.425	1.84068
Annotated Sequence	Modifications	Modifications in Master Proteins	Qvality PEP	Qvality q-value	# Protein Groups	# Proteins	# PSMs	Master Protein Accessions	Positions in Master Proteins	# Missed Cleavages	Theo. MH+ [Da]	Confidence Sequest HT	Percolator q-Value Sequest HT
[R].SAEVYATAK.[K]			0.0108099	0	1	1	1	BA_4385	BA_4385 [56-64]	0	939.478	High	0
[K].IVTQLHK.[G]			0.0324235	0	1	1	1	BA_4385	BA_4385 [90-96]	0	838.515	High	0
[K].ALVYGESDGFVK.[L]			0.125458	0.00396762	1	1	1	BA_4385	BA_4385 [394-405]	0	1284.65	High	0.003185
[K].DNGVTIQAEHNGENK.[E]			0.204548	0.00396762	1	1	1	BA_4385	BA_4385 [253-267]	0	1625.75	High	0.003185
BA_5422	yfiA ribosomal subunit interface protein 4911138:4911680 reverse MW:21038	0.0175439	0.825649	6.11111	1	1	1	1	180	21.025	6.13	0.389	0
Annotated Sequence	Modifications	Modifications in Master Proteins	Qvality PEP	Qvality q-value	# Protein Groups	# Proteins	# PSMs	Master Protein Accessions	Positions in Master Proteins	# Missed Cleavages	Theo. MH+ [Da]	Confidence Sequest HT	Percolator q-Value Sequest HT
[R].GENIEVTPALK.[E]			0.193725	0.00396762	1	1	1	BA_5422	BA_5422 [7-17]	0	1170.64	High	0.003185
BA_4483	BA_4483 ArsR family transcriptional regulator 4077603:4078121 forward MW:19973	0	1.41896	4.06977	1	1	1	1	172	19.96	9.16	0.334	2.08577
Annotated Sequence	Modifications	Modifications in Master Proteins	Qvality PEP	Qvality q-value	# Protein Groups	# Proteins	# PSMs	Master Protein Accessions	Positions in Master Proteins	# Missed Cleavages	Theo. MH+ [Da]	Confidence Sequest HT	Percolator q-Value Sequest HT
[K].VLAHPVR.[L]			0.0575884	0	1	2	1	BA_4483	BA_4483 [97-103]	0	791.489	High	0
BA_3805	BA_3805 prophage LambdaBa01, acyltransferase 3489827:3492457 reverse MW:101260	0	10.5736	5.70776	7	7	7	1	876	101.196	6.16	0.327	7.51387
Annotated Sequence	Modifications	Modifications in Master Proteins	Qvality PEP	Qvality q-value	# Protein Groups	# Proteins	# PSMs	Master Protein Accessions	Positions in Master Proteins	# Missed Cleavages	Theo. MH+ [Da]	Confidence Sequest HT	Percolator q-Value Sequest HT
[R].EFNLHEK.[L]			0.0632583	0	1	1	1	BA_3805	BA_3805 [44-50]	0	916.452	High	0
[K].QTDDFLVYK.[K]			0.00908818	0	1	1	1	BA_3805	BA_3805 [338-346]	0	1128.56	High	0
[K].QTDDFLVYKK.[F]			0.0628203	0	1	1	1	BA_3805	BA_3805 [338-347]	1	1256.65	High	0
[K].CIVHGEDPK.[Q]	1xCarbamidomethyl [C1]		0.0293802	0	1	1	1	BA_3805	BA_3805 [329-337]	0	1054.5	High	0
[K].KVNVDELK.[L]			0.0215416	0	1	1	1	BA_3805	BA_3805 [501-508]	1	944.541	High	0
[R].LGNQYHLER.[L]			0.149711	0.00396762	1	1	1	BA_3805	BA_3805 [94-102]	0	1129.57	High	0.003185
[R].VQPITIR.[-]			0.159919	0.00396762	1	1	1	BA_3805	BA_3805 [870-876]	0	826.515	High	0.003185
BA_4382	bfmbB branched-chain alpha-keto acid dehydrogenase subunit E2 3995335:3996654 reverse MW:47411	0	7.24467	7.28929	3	3	3	1	439	47.381	5.71	0.318	5.44795
Annotated Sequence	Modifications	Modifications in Master Proteins	Qvality PEP	Qvality q-value	# Protein Groups	# Proteins	# PSMs	Master Protein Accessions	Positions in Master Proteins	# Missed Cleavages	Theo. MH+ [Da]	Confidence Sequest HT	Percolator q-Value Sequest HT
[K].LVESGNIPQAGAVK.[K]			0.00278298	0	1	1	1	BA_4382	BA_4382 [156-169]	0	1382.76	High	0
[K].AEVNTPEKAPK.[A]			0.000755076	0	1	1	1	BA_4382	BA_4382 [100-110]	1	1183.63	High	0
[R].FSPAVLK.[L]			0.185184	0.00396762	1	1	1	BA_4382	BA_4382 [121-127]	0	761.456	High	0.003185
BA_0138	rplQ 50S ribosomal protein L17 135291:135653 forward MW:13449	0	3.17121	12.5	1	1	1	1	120	13.441	10.48	0.292	2.38066
Annotated Sequence	Modifications	Modifications in Master Proteins	Qvality PEP	Qvality q-value	# Protein Groups	# Proteins	# PSMs	Master Protein Accessions	Positions in Master Proteins	# Missed Cleavages	Theo. MH+ [Da]	Confidence Sequest HT	Percolator q-Value Sequest HT
[R].NEVANAETGQDALQK.[L]			0.00153423	0	1	1	1	BA_0138	BA_0138 [68-82]	0	1587.76	High	0
BA_0006	gyrA DNA gyrase subunit A 6595:9066 forward MW:92338	0	9.0639	6.07533	6	6	6	1	823	92.28	5.74	0.269	3.89837
Annotated Sequence	Modifications	Modifications in Master Proteins	Qvality PEP	Qvality q-value	# Protein Groups	# Proteins	# PSMs	Master Protein Accessions	Positions in Master Proteins	# Missed Cleavages	Theo. MH+ [Da]	Confidence Sequest HT	Percolator q-Value Sequest HT
[R].FNEQDVR.[S]			0.0276723	0	1	1	1	BA_0006	BA_0006 [674-680]	0	907.427	High	0
[R].MPVDQISQMGR.[N]			0.0164688	0	1	1	1	BA_0006	BA_0006 [775-785]	0	1261.6	High	0
[R].MAQDFSQR.[Y]			0.0460561	0	1	1	1	BA_0006	BA_0006 [94-101]	0	982.441	High	0
[R].AKVEIEEK.[S]			0.0443161	0	1	1	1	BA_0006	BA_0006 [246-253]	1	945.525	High	0
[K].IEGITDLR.[D]			0.111491	0.00396762	1	1	1	BA_0006	BA_0006 [287-294]	0	916.51	High	0.003185
[R].IVGEVIGK.[Y]			0.111869	0.00396762	1	1	1	BA_0006	BA_0006 [71-78]	0	814.503	High	0.003185
BA_2818	recQ-2 ATP-dependent DNA helicase RecQ 2612435:2614552 reverse MW:80352	0	6.15588	5.53191	4	4	4	1	705	80.3	5.44	0.233	3.6702
Annotated Sequence	Modifications	Modifications in Master Proteins	Qvality PEP	Qvality q-value	# Protein Groups	# Proteins	# PSMs	Master Protein Accessions	Positions in Master Proteins	# Missed Cleavages	Theo. MH+ [Da]	Confidence Sequest HT	Percolator q-Value Sequest HT
[R].QTIENHLIR.[C]			0.00305163	0	1	1	1	BA_2818	BA_2818 [640-648]	0	1123.62	High	0
[K].QMIAQVLTGSK.[N]			0.0825552	0	1	1	1	BA_2818	BA_2818 [426-436]	0	1175.65	High	0
[K].TEVVSER.[K]			0.104887	0.00396762	1	1	1	BA_2818	BA_2818 [598-604]	0	819.421	High	0.003185
[K].MPQSDSELLTVK.[G]			0.151704	0.00396762	1	1	1	BA_2818	BA_2818 [553-564]	0	1347.68	High	0.003185
BA_0880	BA_0880 hypothetical protein 889289:889660 forward MW:14867	0	2.59998	8.13008	1	1	1	1	123	14.858	8.51	0.233	2.2595
Annotated Sequence	Modifications	Modifications in Master Proteins	Qvality PEP	Qvality q-value	# Protein Groups	# Proteins	# PSMs	Master Protein Accessions	Positions in Master Proteins	# Missed Cleavages	Theo. MH+ [Da]	Confidence Sequest HT	Percolator q-Value Sequest HT
[K].STWINKVDDK.[L]			0.005012	0	1	1	1	BA_0880	BA_0880 [52-61]	1	1205.62	High	0
BA_2546	BA_2546 hypothetical protein 2369189:2370157 forward MW:37583	0	2.99937	4.34783	2	2	2	1	322	37.559	9	0.222	1.6485
Annotated Sequence	Modifications	Modifications in Master Proteins	Qvality PEP	Qvality q-value	# Protein Groups	# Proteins	# PSMs	Master Protein Accessions	Positions in Master Proteins	# Missed Cleavages	Theo. MH+ [Da]	Confidence Sequest HT	Percolator q-Value Sequest HT
[K].IYSGFEK.[A]			0.0440067	0	1	1	1	BA_2546	BA_2546 [116-122]	0	843.425	High	0
[K].LVQPSTR.[E]			0.0538984	0	1	1	1	BA_2546	BA_2546 [70-76]	0	800.462	High	0
BA_4515	sigA RNA polymerase sigma factor RpoD 4108218:4109339 reverse MW:43038	0	2.48694	4.55764	2	3	2	1	373	43.011	4.93	0.222	3.2996
Annotated Sequence	Modifications	Modifications in Master Proteins	Qvality PEP	Qvality q-value	# Protein Groups	# Proteins	# PSMs	Master Protein Accessions	Positions in Master Proteins	# Missed Cleavages	Theo. MH+ [Da]	Confidence Sequest HT	Percolator q-Value Sequest HT
[R].FGLDDGR.[T]			0.0554231	0	1	1	1	BA_4515	BA_4515 [324-330]	0	779.368	High	0
[R].IEEGDEEAKR.[R]			0.122954	0.00396762	1	1	2	BA_4515	BA_4515 [129-138]	1	1175.55	High	0.003185
BA_2299	rocR-2 arginine utilization regulatory protein RocR 2146046:2147431 forward MW:51853	0	2.44076	3.68764	2	2	2	1	461	51.821	8.7	0.202	1.7004
Annotated Sequence	Modifications	Modifications in Master Proteins	Qvality PEP	Qvality q-value	# Protein Groups	# Proteins	# PSMs	Master Protein Accessions	Positions in Master Proteins	# Missed Cleavages	Theo. MH+ [Da]	Confidence Sequest HT	Percolator q-Value Sequest HT
[K].GSYTGAIER.[A]			0.0329988	0	1	1	1	BA_2299	BA_2299 [229-237]	0	953.469	High	0
[R].VLEDGVIR.[R]			0.224891	0.00751576	1	1	1	BA_2299	BA_2299 [268-275]	0	900.515	High	0.005998
BA_1481	BA_1481 phage integrase family site specific recombinase 1399453:1399983 reverse MW:20372	0	2.00379	5.68182	1	1	1	1	176	20.36	9.58	0.194	2.12862
Annotated Sequence	Modifications	Modifications in Master Proteins	Qvality PEP	Qvality q-value	# Protein Groups	# Proteins	# PSMs	Master Protein Accessions	Positions in Master Proteins	# Missed Cleavages	Theo. MH+ [Da]	Confidence Sequest HT	Percolator q-Value Sequest HT
[K].QAGQPIQNEK.[Q]			0.0171824	0	1	1	1	BA_1481	BA_1481 [3-12]	0	1112.57	High	0
BA_0122	rplE 50S ribosomal protein L5 126795:127334 forward MW:20177	0.0175439	0.954677	5.02793	1	1	1	1	179	20.165	9.7	0.194	0
Annotated Sequence	Modifications	Modifications in Master Proteins	Qvality PEP	Qvality q-value	# Protein Groups	# Proteins	# PSMs	Master Protein Accessions	Positions in Master Proteins	# Missed Cleavages	Theo. MH+ [Da]	Confidence Sequest HT	Percolator q-Value Sequest HT
[K].EITPALVSK.[F]			0.149216	0.00396762	1	1	1	BA_0122	BA_0122 [11-19]	0	957.562	High	0.003185
BA_0110	rplC 50S ribosomal protein L3 121305:121937 forward MW:22692	0.0327869	0.715569	4.7619	1	1	1	1	210	22.678	10.02	0.194	0
Annotated Sequence	Modifications	Modifications in Master Proteins	Qvality PEP	Qvality q-value	# Protein Groups	# Proteins	# PSMs	Master Protein Accessions	Positions in Master Proteins	# Missed Cleavages	Theo. MH+ [Da]	Confidence Sequest HT	Percolator q-Value Sequest HT
[K].SLVVVQGAVK.[V]			0.242338	0.00751576	1	1	1	BA_0110	BA_0110 [198-207]	0	999.62	High	0.005998
BA_2941	BA_2941 hypothetical protein 2707112:2707795 reverse MW:26181	0	1.7716	4.84581	1	1	1	1	227	26.164	6.58	0.166	0
Annotated Sequence	Modifications	Modifications in Master Proteins	Qvality PEP	Qvality q-value	# Protein Groups	# Proteins	# PSMs	Master Protein Accessions	Positions in Master Proteins	# Missed Cleavages	Theo. MH+ [Da]	Confidence Sequest HT	Percolator q-Value Sequest HT
[K].VQVDHGATSCK.[T]	1xCarbamidomethyl [C10]		0.02777	0	1	1	1	BA_2941	BA_2941 [196-206]	0	1201.56	High	0
BA_0116	rpsC 30S ribosomal protein S3 124437:125096 forward MW:24294	0	1.78995	3.65297	1	1	1	1	219	24.279	9.99	0.155	1.90113
Annotated Sequence	Modifications	Modifications in Master Proteins	Qvality PEP	Qvality q-value	# Protein Groups	# Proteins	# PSMs	Master Protein Accessions	Positions in Master Proteins	# Missed Cleavages	Theo. MH+ [Da]	Confidence Sequest HT	Percolator q-Value Sequest HT
[K].LVGENIAR.[Q]			0.0268084	0	1	1	1	BA_0116	BA_0116 [114-121]	0	871.5	High	0
BA_4995	BA_4995 phage integrase family site specific recombinase 4534516:4535082 reverse MW:21677	0	1.19798	4.78723	1	1	1	1	188	21.663	7.66	0.145	0
Annotated Sequence	Modifications	Modifications in Master Proteins	Qvality PEP	Qvality q-value	# Protein Groups	# Proteins	# PSMs	Master Protein Accessions	Positions in Master Proteins	# Missed Cleavages	Theo. MH+ [Da]	Confidence Sequest HT	Percolator q-Value Sequest HT
[R].ENYVFQSNK.[T]			0.0905728	0	1	1	1	BA_4995	BA_4995 [98-106]	0	1128.53	High	0
BA_5200	BA_5200 transcriptional activator tipA 4720588:4721319 reverse MW:28256	0.0175439	0.871924	4.52675	1	1	1	1	243	28.238	6.46	0.129	0
Annotated Sequence	Modifications	Modifications in Master Proteins	Qvality PEP	Qvality q-value	# Protein Groups	# Proteins	# PSMs	Master Protein Accessions	Positions in Master Proteins	# Missed Cleavages	Theo. MH+ [Da]	Confidence Sequest HT	Percolator q-Value Sequest HT
[K].EKQEEFNAIYR.[N]			0.176398	0.00396762	1	1	1	BA_5200	BA_5200 [156-166]	1	1426.7	High	0.003185
BA_4831	polA DNA polymerase I 4392304:4394937 reverse MW:99400	0	5.535	2.96465	3	3	3	1	877	99.337	5.01	0.126	3.78631
Annotated Sequence	Modifications	Modifications in Master Proteins	Qvality PEP	Qvality q-value	# Protein Groups	# Proteins	# PSMs	Master Protein Accessions	Positions in Master Proteins	# Missed Cleavages	Theo. MH+ [Da]	Confidence Sequest HT	Percolator q-Value Sequest HT
[K].AAAEFIEK.[Y]			0.00344244	0	1	1	1	BA_4831	BA_4831 [732-739]	0	878.462	High	0
[R].VLADMEVK.[G]			0.0295879	0	1	1	1	BA_4831	BA_4831 [485-492]	0	904.481	High	0
[R].FNQVLTQTGR.[L]			0.13237	0.00396762	1	1	1	BA_4831	BA_4831 [607-616]	0	1163.62	High	0.003185
BA_4839	citZ citrate synthase 4401478:4402593 reverse MW:41784	0	1.26785	2.15633	1	1	1	1	371	41.757	5.57	0.116	0
Annotated Sequence	Modifications	Modifications in Master Proteins	Qvality PEP	Qvality q-value	# Protein Groups	# Proteins	# PSMs	Master Protein Accessions	Positions in Master Proteins	# Missed Cleavages	Theo. MH+ [Da]	Confidence Sequest HT	Percolator q-Value Sequest HT
[R].VYEQGDPR.[A]			0.0786696	0	1	1	1	BA_4839	BA_4839 [259-266]	0	963.453	High	0
BA_2267	BA_2267 alcohol dehydrogenase 2112163:2113200 forward MW:36737	0	1.69443	2.31884	1	1	1	1	345	36.714	5.2	0.11	0
Annotated Sequence	Modifications	Modifications in Master Proteins	Qvality PEP	Qvality q-value	# Protein Groups	# Proteins	# PSMs	Master Protein Accessions	Positions in Master Proteins	# Missed Cleavages	Theo. MH+ [Da]	Confidence Sequest HT	Percolator q-Value Sequest HT
[K].ANIEVVEK.[E]			0.0326524	0	1	1	1	BA_2267	BA_2267 [12-19]	0	901.499	High	0
BA_5313	BA_5313 pyridine nucleotide-disulfide oxidoreductase 4815960:4817138 forward MW:41631	0	1.41544	2.29592	1	1	1	1	392	41.605	8.15	0.11	1.62309
Annotated Sequence	Modifications	Modifications in Master Proteins	Qvality PEP	Qvality q-value	# Protein Groups	# Proteins	# PSMs	Master Protein Accessions	Positions in Master Proteins	# Missed Cleavages	Theo. MH+ [Da]	Confidence Sequest HT	Percolator q-Value Sequest HT
[K].LLLVEAGPK.[I]			0.0579909	0	1	1	1	BA_5313	BA_5313 [193-201]	0	939.587	High	0
BA_0108	tuf elongation factor Tu 119376:120563 forward MW:42939	0.0175439	0.904482	1.77215	1	2	1	1	395	42.912	5.01	0.11	0
Annotated Sequence	Modifications	Modifications in Master Proteins	Qvality PEP	Qvality q-value	# Protein Groups	# Proteins	# PSMs	Master Protein Accessions	Positions in Master Proteins	# Missed Cleavages	Theo. MH+ [Da]	Confidence Sequest HT	Percolator q-Value Sequest HT
[R].EHILLSR.[Q]			0.165253	0.00396762	1	1	2	BA_0108	BA_0108 [118-124]	0	867.505	High	0.003185
BA_5670	BA_5670 glycosyl transferase family protein 5154293:5155393 reverse MW:41411	0.0327869	0.723538	4.09836	1	1	1	1	366	41.385	7.37	0.11	0
Annotated Sequence	Modifications	Modifications in Master Proteins	Qvality PEP	Qvality q-value	# Protein Groups	# Proteins	# PSMs	Master Protein Accessions	Positions in Master Proteins	# Missed Cleavages	Theo. MH+ [Da]	Confidence Sequest HT	Percolator q-Value Sequest HT
[K].EEVELMVFEEGAIAR.[E]			0.238616	0.00751576	1	1	1	BA_5670	BA_5670 [29-43]	0	1721.84	High	0.005998
BA_0824	BA_0824 hypothetical protein 836352:837416 forward MW:40282	0.0175439	1.06058	2.25989	1	1	1	1	354	40.256	5.99	0.101	0
Annotated Sequence	Modifications	Modifications in Master Proteins	Qvality PEP	Qvality q-value	# Protein Groups	# Proteins	# PSMs	Master Protein Accessions	Positions in Master Proteins	# Missed Cleavages	Theo. MH+ [Da]	Confidence Sequest HT	Percolator q-Value Sequest HT
[K].ELLSENIR.[V]			0.12009	0.00396762	1	1	1	BA_0824	BA_0824 [127-134]	0	973.531	High	0.003185
BA_4838	citC isocitrate dehydrogenase 4400025:4401317 reverse MW:46955	0	1.89008	2.32558	1	1	1	1	430	46.925	5.15	0.08	1.71118
Annotated Sequence	Modifications	Modifications in Master Proteins	Qvality PEP	Qvality q-value	# Protein Groups	# Proteins	# PSMs	Master Protein Accessions	Positions in Master Proteins	# Missed Cleavages	Theo. MH+ [Da]	Confidence Sequest HT	Percolator q-Value Sequest HT
[K].AMADAEVAGK.[I]			0.021771	0	1	1	1	BA_4838	BA_4838 [269-278]	0	962.461	High	0
BA_2107	fhs formate--tetrahydrofolate ligase 1965220:1966908 forward MW:60489	0.0175439	0.890759	1.9573	1	1	1	1	562	60.451	5.63	0.08	0
Annotated Sequence	Modifications	Modifications in Master Proteins	Qvality PEP	Qvality q-value	# Protein Groups	# Proteins	# PSMs	Master Protein Accessions	Positions in Master Proteins	# Missed Cleavages	Theo. MH+ [Da]	Confidence Sequest HT	Percolator q-Value Sequest HT
[K].GGQGGVDLAEK.[V]			0.169634	0.00396762	1	1	1	BA_2107	BA_2107 [418-428]	0	1030.52	High	0.003185
BA_5437	BA_5437 BigG family transcription antiterminator 4924678:4927353 forward MW:102286	0.0175439	0.852324	0.785634	1	1	1	1	891	102.22	5.99	0.05	1.6978
Annotated Sequence	Modifications	Modifications in Master Proteins	Qvality PEP	Qvality q-value	# Protein Groups	# Proteins	# PSMs	Master Protein Accessions	Positions in Master Proteins	# Missed Cleavages	Theo. MH+ [Da]	Confidence Sequest HT	Percolator q-Value Sequest HT
[K].YEELQAR.[G]			0.183991	0.00396762	1	1	1	BA_5437	BA_5437 [388-394]	0	908.447	High	0.003185
BA_4639	recJ single-stranded-DNA-specific exonuclease RecJ 4214768:4217107 reverse MW:88150	0.0175439	1.01024	1.2837	1	1	1	1	779	88.094	5.27	0.049	0
Annotated Sequence	Modifications	Modifications in Master Proteins	Qvality PEP	Qvality q-value	# Protein Groups	# Proteins	# PSMs	Master Protein Accessions	Positions in Master Proteins	# Missed Cleavages	Theo. MH+ [Da]	Confidence Sequest HT	Percolator q-Value Sequest HT
[R].QYGEQLCQHK.[G]	1xCarbamidomethyl [C7]		0.133258	0.00396762	1	1	1	BA_4639	BA_4639 [688-697]	0	1290.59	High	0.003185
BA_4157	pyc pyruvate carboxylase 3808980:3812426 reverse MW:128575	0	1.36714	0.87108	1	1	1	1	1148	128.493	5.96	0.03	0
Annotated Sequence	Modifications	Modifications in Master Proteins	Qvality PEP	Qvality q-value	# Protein Groups	# Proteins	# PSMs	Master Protein Accessions	Positions in Master Proteins	# Missed Cleavages	Theo. MH+ [Da]	Confidence Sequest HT	Percolator q-Value Sequest HT
[R].EIVVKDESVK.[A]			0.0641431	0	1	1	1	BA_4157	BA_4157 [1055-1064]	1	1145.64	High	0
BA_3955	polC DNA polymerase III PolC 3629390:3633691 reverse MW:161660	0.0327869	0.752518	0.697837	1	1	1	1	1433	161.556	5.41	0.026	0
Annotated Sequence	Modifications	Modifications in Master Proteins	Qvality PEP	Qvality q-value	# Protein Groups	# Proteins	# PSMs	Master Protein Accessions	Positions in Master Proteins	# Missed Cleavages	Theo. MH+ [Da]	Confidence Sequest HT	Percolator q-Value Sequest HT
[R].GSVQNDTFVR.[D]			0.224891	0.00751576	1	1	1	BA_3955	BA_3955 [295-304]	0	1122.55	High	0.005998

## Sheet: T3
In vitro promoter pull-down proteins list at T3
Accession	Description	Exp. q-value	Sum PEP Score	Coverage	# Peptides	# PSMs	# Unique Peptides	# Protein Groups	# AAs	MW [kDa]	calc. pI	Modifications	emPAI	Score Sequest HT	# Peptides Sequest HT
BA_3858	hup-3 DNA-binding protein HU 3530483:3530755 forward MW:9729	0	14.5917	40	4	7	3	1	90	9.723	9.13		30.623	19.2195	4
Annotated Sequence	Modifications	Modifications in Master Proteins	Qvality PEP	Qvality q-value	# Protein Groups	# Proteins	# PSMs	Master Protein Accessions	Positions in Master Proteins	# Missed Cleavages	Theo. MH+ [Da]	XCorr Sequest HT	Confidence Sequest HT	Percolator q-Value Sequest HT	Percolator PEP Sequest HT
[R].NPQTGEEMQIAASK.[V]			0.000590945	0	1	1	1	BA_3858	BA_3858 [62-75]	0	1503.71	3.42714	High	0	0.0005993
[R].TGRNPQTGEEMQIAASK.[V]			0.000561507	0	1	1	2	BA_3858	BA_3858 [59-75]	1	1817.88	3.4051	High	0	0.0005693
[-].MNKTELIK.[N]			0.0174118	0	2	2	1	BA_2377; BA_3858	BA_2377 [1-8]; BA_3858 [1-8]	1	976.55	2.78441	High	0	0.01723
[-].MNKTELIK.[N]	1xOxidation [M1]		0.00518324	0	2	2	1	BA_2377; BA_3858	BA_2377 [1-8]; BA_3858 [1-8]	1	992.544	2.24135	High	0	0.005162
[K].NVAQNAEISQK.[E]			0.00198882	0	1	1	2	BA_3858	BA_3858 [9-19]	0	1201.62	3.08939	High	0	0.002073
BA_0047	spoVG regulatory protein SpoVG 50523:50816 forward MW:10934	0	17.5679	38.1443	5	17	5	1	97	10.928	5.26		9	38.5171	5
Annotated Sequence	Modifications	Modifications in Master Proteins	Qvality PEP	Qvality q-value	# Protein Groups	# Proteins	# PSMs	Master Protein Accessions	Positions in Master Proteins	# Missed Cleavages	Theo. MH+ [Da]	XCorr Sequest HT	Confidence Sequest HT	Percolator q-Value Sequest HT	Percolator PEP Sequest HT
[K].IQDAVLTEYHR.[L]			0.000354506	0	1	1	1	BA_0047	BA_0047 [72-82]	0	1344.69	2.83314	High	0	0.0003599
[R].TPDGEFR.[D]			0.0365015	0	1	1	2	BA_0047	BA_0047 [52-58]	0	821.379	2.30725	High	0	0.03587
[R].DIAHPINSGTR.[S]			0.00111455	0	1	1	7	BA_0047	BA_0047 [59-69]	0	1180.61	2.925	High	0	0.01002
[R].DIAHPINSGTR.[S]	1xDeamidated [N7]		0.000290204	0	1	1	1	BA_0047	BA_0047 [59-69]	0	1181.59	3.24954	High	0	0.0002952
[K].RTPDGEFR.[D]			0.0500079	0	1	1	2	BA_0047	BA_0047 [51-58]	1	977.48	2.62983	High	0	0.1205
[-].MEVTDVR.[L]			0.0374353	0	1	1	3	BA_0047	BA_0047 [1-7]	0	849.413	2.22185	High	0	0.1068
[-].MEVTDVR.[L]	1xOxidation [M1]		0.0354411	0	1	1	1	BA_0047	BA_0047 [1-7]	0	865.408	1.95788	High	0	0.03485
BA_2377	hup-2 DNA-binding protein HU 2216729:2217001 reverse MW:9591	0	8.36007	36.6667	3	4	2	1	90	9.586	9.13		9	9.68241	3
Annotated Sequence	Modifications	Modifications in Master Proteins	Qvality PEP	Qvality q-value	# Protein Groups	# Proteins	# PSMs	Master Protein Accessions	Positions in Master Proteins	# Missed Cleavages	Theo. MH+ [Da]	XCorr Sequest HT	Confidence Sequest HT	Percolator q-Value Sequest HT	Percolator PEP Sequest HT
[R].NPQTGEEIQIAAGK.[V]			0.00440915	0	1	1	1	BA_2377	BA_2377 [62-75]	0	1455.74	2.58963	High	0	0.004405
[-].MNKTELIK.[N]			0.0174118	0	2	2	1	BA_2377; BA_3858	BA_2377 [1-8]; BA_3858 [1-8]	1	976.55	2.78441	High	0	0.01723
[-].MNKTELIK.[N]	1xOxidation [M1]		0.00518324	0	2	2	1	BA_2377; BA_3858	BA_2377 [1-8]; BA_3858 [1-8]	1	992.544	2.24135	High	0	0.005162
[K].NVAQSADISQK.[D]			0.0112422	0	1	1	1	BA_2377	BA_2377 [9-19]	0	1160.59	2.06702	High	0	0.01114
BA_1012	BA_1012 3'-5' exoribonuclease YhaM 1003757:1004701 forward MW:35500	0	36.9257	30.2548	12	47	12	1	314	35.478	6.29		5.449	62.1676	12
Annotated Sequence	Modifications	Modifications in Master Proteins	Qvality PEP	Qvality q-value	# Protein Groups	# Proteins	# PSMs	Master Protein Accessions	Positions in Master Proteins	# Missed Cleavages	Theo. MH+ [Da]	XCorr Sequest HT	Confidence Sequest HT	Percolator q-Value Sequest HT	Percolator PEP Sequest HT
[K].HQNEFLDYPAATK.[N]			0.000776078	0	1	1	4	BA_1012	BA_1012 [139-151]	0	1533.73	3.11446	High	0	0.002217
[K].VAGDILNYK.[G]			0.000932023	0	1	1	2	BA_1012	BA_1012 [69-77]	0	992.541	2.94569	High	0	0.0009409
[K].VAGDILNYK.[G]	1xDeamidated [N7]		0.00136149	0	1	1	1	BA_1012	BA_1012 [69-77]	0	993.525	2.72284	High	0	0.00137
[K].LWDVSPEVEK.[Q]			0.00185784	0	1	1	1	BA_1012	BA_1012 [50-59]	0	1201.61	2.58632	High	0	0.001869
[R].VFALDNR.[S]			0.0433682	0	1	1	3	BA_1012	BA_1012 [299-305]	0	834.447	1.7139	High	0	0.1193
[K].AEWGSPKPPLVK.[E]			0.00330093	0	1	1	1	BA_1012	BA_1012 [254-265]	0	1308.73	2.2561	High	0	0.003305
[R].SFYKPSFHN.[-]			0.0141417	0	1	1	1	BA_1012	BA_1012 [306-314]	0	1126.53	2.2685	High	0	0.01404
[K].QYVAETIVK.[V]			0.0105029	0	1	1	4	BA_1012	BA_1012 [60-68]	0	1050.58	2.52435	High	0	0.01043
[K].EDMVEK.[I]			0.140455	0	1	1	1	BA_1012	BA_1012 [110-115]	0	750.334	1.61675	High	0	0.1366
[K].APVKKEDMVEK.[I]			2.50055e-05	0	1	1	6	BA_1012	BA_1012 [105-115]	2	1273.68	4.07747	High	0	0.0002837
[K].KEDMVEK.[I]			0.00217485	0	1	1	1	BA_1012	BA_1012 [109-115]	1	878.429	2.47891	High	0	0.002181
[R].TKPGEYTER.[V]			0.104152	0	1	1	1	BA_1012	BA_1012 [290-298]	0	1080.53	1.43004	High	0	0.1018
[K].MNMMDR.[A]			0.0757553	0	1	1	3	BA_1012	BA_1012 [280-285]	0	797.31	1.34665	High	0	0.07411
[K].MNMMDR.[A]	1xDeamidated [N2]		0.0471618	0	1	1	2	BA_1012	BA_1012 [280-285]	0	798.294	2.03229	High	0	0.1113
[K].MNMMDR.[A]	1xOxidation [M]		0.0272808	0	1	1	16	BA_1012	BA_1012 [280-285]	0	813.305	1.78868	High	0	0.07075
BA_1531	hup-1 DNA-binding protein HU 1447107:1447379 forward MW:9642	0	9.17519	34.4444	4	7	4	1	90	9.636	9.31		5.31	17.6023	4
Annotated Sequence	Modifications	Modifications in Master Proteins	Qvality PEP	Qvality q-value	# Protein Groups	# Proteins	# PSMs	Master Protein Accessions	Positions in Master Proteins	# Missed Cleavages	Theo. MH+ [Da]	XCorr Sequest HT	Confidence Sequest HT	Percolator q-Value Sequest HT	Percolator PEP Sequest HT
[K].GRNPQTGEEIEIAASK.[V]			0.0013385	0	1	1	2	BA_1531	BA_1531 [60-75]	1	1699.86	2.88496	High	0	0.001349
[R].NPQTGEEIEIAASK.[V]			0.000241647	0	1	1	1	BA_1531	BA_1531 [62-75]	0	1486.74	3.54203	High	0	0.0002464
[K].ALKDAVK.[-]			0.13772	0	1	1	1	BA_1531	BA_1531 [84-90]	1	744.461	2.44157	High	0	0.1339
[K].VPAFKPGK.[A]			0.015136	0	1	1	3	BA_1531	BA_1531 [76-83]	0	843.509	2.07511	High	0	0.01501
BA_4547	rpsT 30S ribosomal protein S20 4136602:4136859 forward MW:9341	0	3.62303	12.9412	2	2	2	1	85	9.336	10.67		3.642	4.54964	2
Annotated Sequence	Modifications	Modifications in Master Proteins	Qvality PEP	Qvality q-value	# Protein Groups	# Proteins	# PSMs	Master Protein Accessions	Positions in Master Proteins	# Missed Cleavages	Theo. MH+ [Da]	XCorr Sequest HT	Confidence Sequest HT	Percolator q-Value Sequest HT	Percolator PEP Sequest HT
[R].KGLIHQNAAAR.[Q]			0.0683268	0	1	1	1	BA_4547	BA_4547 [64-74]	1	1178.68	2.13055	High	0	0.06682
[K].GLIHQNAAAR.[Q]			0.00356382	0	1	1	1	BA_4547	BA_4547 [65-74]	0	1050.58	2.41908	High	0	0.003565
BA_5395	uvrA excinuclease ABC subunit A 4884257:4887133 reverse MW:106453	0	46.5952	19.4154	20	31	20	1	958	106.385	6.52		1.555	69.7779	20
Annotated Sequence	Modifications	Modifications in Master Proteins	Qvality PEP	Qvality q-value	# Protein Groups	# Proteins	# PSMs	Master Protein Accessions	Positions in Master Proteins	# Missed Cleavages	Theo. MH+ [Da]	XCorr Sequest HT	Confidence Sequest HT	Percolator q-Value Sequest HT	Percolator PEP Sequest HT
[K].LGQPATTLSGGEAQR.[V]			0.000397701	0	1	1	3	BA_5395	BA_5395 [823-837]	0	1485.77	3.19199	High	0	0.0004046
[K].SKDFIVVK.[G]			0.00386406	0	1	1	1	BA_5395	BA_5395 [4-11]	1	935.556	2.3991	High	0	0.003868
[R].VLEYPER.[T]			0.0348488	0	1	1	2	BA_5395	BA_5395 [143-149]	0	905.473	2.42253	High	0	0.03424
[R].DVFAQTNEAK.[V]			0.00586413	0	1	1	1	BA_5395	BA_5395 [713-722]	0	1122.54	2.74096	High	0	0.005847
[R].YNRETLEVK.[Y]			0.00142678	0	1	1	1	BA_5395	BA_5395 [771-779]	1	1151.61	2.55103	High	0	0.001438
[R].ETSSDYIR.[E]			0.010282	0	1	1	2	BA_5395	BA_5395 [389-396]	0	970.448	2.2099	High	0	0.01209
[K].STMINEVLYK.[S]			0.000766227	0	1	1	1	BA_5395	BA_5395 [648-657]	0	1197.62	2.63815	High	0	0.0007737
[K].STMINEVLYK.[S]	1xOxidation [M3]		0.0304484	0	1	1	1	BA_5395	BA_5395 [648-657]	0	1213.61	1.78299	High	0	0.03002
[R].LLEVLQR.[L]			0.0247518	0	1	1	1	BA_5395	BA_5395 [871-877]	0	870.541	1.67212	High	0	0.02447
[R].LADSLESALK.[L]			0.000531268	0	1	1	1	BA_5395	BA_5395 [221-230]	0	1046.57	2.68008	High	0	0.0005387
[K].VIDIDQSPIGR.[T]			0.11334	0	1	1	1	BA_5395	BA_5395 [685-695]	0	1212.66	1.90889	High	0	0.1106
[K].GGQIVASGTPEQVVK.[E]			0.111088	0	1	1	1	BA_5395	BA_5395 [912-926]	0	1469.8	2.29023	High	0	0.1084
[K].IAHLILR.[E]			0.0113382	0	1	1	1	BA_5395	BA_5395 [457-463]	0	835.551	1.61141	High	0	0.01124
[R].YVNEFGQVK.[E]			0.0076997	0	1	1	1	BA_5395	BA_5395 [362-370]	0	1083.55	2.17738	High	0	0.007658
[K].YMAEQACPK.[C]	1xOxidation [M2]; 1xCarbamidomethyl [C7]		0.00350365	0	1	1	1	BA_5395	BA_5395 [402-410]	0	1113.47	1.97013	High	0	0.003506
[R].KVEIVGAK.[E]			0.00168452	0	1	1	2	BA_5395	BA_5395 [613-620]	1	843.53	2.89362	High	0	0.001695
[R].AAGTLSGGEAQR.[I]			0.000837903	0	1	1	3	BA_5395	BA_5395 [485-496]	0	1117.56	3.39485	High	0	0.001463
[K].YMAEQACPK.[C]	1xCarbamidomethyl [C7]		0.00614518	0	1	1	1	BA_5395	BA_5395 [402-410]	0	1097.48	2.28136	High	0	0.006111
[R].LATQIGSR.[L]			0.0177851	0	1	1	2	BA_5395	BA_5395 [499-506]	0	845.484	2.33385	High	0	0.0176
[K].VLYGSGEEK.[V]			0.01533	0	1	1	1	BA_5395	BA_5395 [349-357]	0	981.489	2.11971	High	0	0.01516
[K].GLEHLDK.[V]			0.0729964	0	1	1	1	BA_5395	BA_5395 [678-684]	0	811.431	2.35157	High	0	0.07148
[K].VLEDIKK.[Q]			0.0301924	0	1	1	2	BA_5395	BA_5395 [169-175]	1	844.514	1.87506	High	0	0.05452
BA_3982	rpsP 30S ribosomal protein S16 3658251:3658523 reverse MW:10117	0	3.12195	21.1111	2	2	2	1	90	10.111	10.14		1.512	3.49333	2
Annotated Sequence	Modifications	Modifications in Master Proteins	Qvality PEP	Qvality q-value	# Protein Groups	# Proteins	# PSMs	Master Protein Accessions	Positions in Master Proteins	# Missed Cleavages	Theo. MH+ [Da]	XCorr Sequest HT	Confidence Sequest HT	Percolator q-Value Sequest HT	Percolator PEP Sequest HT
[K].WLGNGAKPSDTVR.[N]	1xDeamidated [N4]		0.0158597	0	1	1	1	BA_3982	BA_3982 [59-71]	0	1401.71	1.66175	High	0	0.01571
[K].KTPFYR.[V]			0.0489728	0	1	1	1	BA_3982	BA_3982 [14-19]	1	811.446	1.83158	High	0	0.04807
BA_0105	rpsL 30S ribosomal protein S12 116050:116472 forward MW:15446	0	4.5975	15	3	3	3	1	140	15.437	11.14		1.154	6.63303	3
Annotated Sequence	Modifications	Modifications in Master Proteins	Qvality PEP	Qvality q-value	# Protein Groups	# Proteins	# PSMs	Master Protein Accessions	Positions in Master Proteins	# Missed Cleavages	Theo. MH+ [Da]	XCorr Sequest HT	Confidence Sequest HT	Percolator q-Value Sequest HT	Percolator PEP Sequest HT
[K].STDISAPQKR.[G]			0.116565	0	1	1	1	BA_0105	BA_0105 [35-44]	1	1102.59	2.29607	High	0	0.1136
[R].GALDTAGVDKR.[M]			0.00476026	0	1	1	1	BA_0105	BA_0105 [113-123]	1	1102.59	2.43799	High	0	0.004753
[K].STDISAPQK.[R]			0.0475585	0	1	1	1	BA_0105	BA_0105 [35-43]	0	946.484	1.89896	High	0	0.04679
BA_4534	rpsU 30S ribosomal protein S21 4122482:4122655 reverse MW:6772	0	1.66878	14.0351	1	1	1	1	57	6.769	11.09		1.154	2.32676	1
Annotated Sequence	Modifications	Modifications in Master Proteins	Qvality PEP	Qvality q-value	# Protein Groups	# Proteins	# PSMs	Master Protein Accessions	Positions in Master Proteins	# Missed Cleavages	Theo. MH+ [Da]	XCorr Sequest HT	Confidence Sequest HT	Percolator q-Value Sequest HT	Percolator PEP Sequest HT
[K].TGTLAEAR.[K]			0.021707	0	1	1	1	BA_4534	BA_4534 [26-33]	0	818.437	2.32676	High	0	0.02144
BA_0123	rpsN 30S ribosomal protein S14 127368:127553 forward MW:7263	0	1.22856	9.83607	1	1	1	1	61	7.259	10.37		1.154	0	1
Annotated Sequence	Modifications	Modifications in Master Proteins	Qvality PEP	Qvality q-value	# Protein Groups	# Proteins	# PSMs	Master Protein Accessions	Positions in Master Proteins	# Missed Cleavages	Theo. MH+ [Da]	XCorr Sequest HT	Confidence Sequest HT	Percolator q-Value Sequest HT	Percolator PEP Sequest HT
[K].VQEYTR.[C]			0.0603318	0	1	1	1	BA_0123	BA_0123 [18-23]	0	795.4	1.41034	High	0	0.05908
BA_4818	rpmI 50S ribosomal protein L35 4380413:4380613 reverse MW:7495	0	0.997834	15.1515	1	1	1	1	66	7.491	11.93		1.154	0	1
Annotated Sequence	Modifications	Modifications in Master Proteins	Qvality PEP	Qvality q-value	# Protein Groups	# Proteins	# PSMs	Master Protein Accessions	Positions in Master Proteins	# Missed Cleavages	Theo. MH+ [Da]	XCorr Sequest HT	Confidence Sequest HT	Percolator q-Value Sequest HT	Percolator PEP Sequest HT
[K].AGVVSAGDFK.[R]			0.102897	0	1	1	1	BA_4818	BA_4818 [47-56]	0	950.494	1.51508	High	0	0.1005
BA_0102	rpoB DNA-directed RNA polymerase subunit beta 108391:111924 forward MW:131875	0	43.512	15.3781	23	27	23	1	1177	131.791	5.1		1.133	49.7702	23
Annotated Sequence	Modifications	Modifications in Master Proteins	Qvality PEP	Qvality q-value	# Protein Groups	# Proteins	# PSMs	Master Protein Accessions	Positions in Master Proteins	# Missed Cleavages	Theo. MH+ [Da]	XCorr Sequest HT	Confidence Sequest HT	Percolator q-Value Sequest HT	Percolator PEP Sequest HT
[R].ALMGANMQR.[Q]			0.0342662	0	1	1	1	BA_0102	BA_0102 [636-644]	0	991.481	1.9478	High	0	0.03379
[K].RYDLANVGR.[Y]			0.0063041	0	1	1	1	BA_0102	BA_0102 [264-272]	1	1063.56	2.79645	High	0	0.006288
[K].GVTELTAEER.[L]			0.00731647	0	1	1	1	BA_0102	BA_0102 [849-858]	0	1104.55	2.25129	High	0	0.007269
[K].LGPEEITR.[D]			0.0152651	0	1	1	2	BA_0102	BA_0102 [803-810]	0	914.494	2.13701	High	0	0.07783
[R].YVEVDGQTVK.[G]			0.0196075	0	1	1	1	BA_0102	BA_0102 [694-703]	0	1137.58	2.0385	High	0	0.01939
[R].LRPGEPPTVENAK.[S]			0.000404533	0	1	1	2	BA_0102	BA_0102 [240-252]	0	1407.76	3.7511	High	0	0.0004107
[R].TGEPFDNR.[V]			0.0281001	0	1	1	1	BA_0102	BA_0102 [1021-1028]	0	935.422	1.78678	High	0	0.02773
[R].FRGENIVTNK.[E]			0.0174859	0	1	1	1	BA_0102	BA_0102 [595-604]	1	1177.63	3.27622	High	0	0.01731
[K].TILYDGR.[T]			0.0779694	0	1	1	1	BA_0102	BA_0102 [1014-1020]	0	837.446	1.51027	High	0	0.07617
[K].MMSSDDTEIEMR.[D]			0.0169022	0	1	1	1	BA_0102	BA_0102 [1143-1154]	0	1444.58	2.04769	High	0	0.01673
[R].VIVSQLVR.[S]			0.0190341	0	1	1	1	BA_0102	BA_0102 [133-140]	0	913.583	1.93362	High	0	0.01885
[R].YDLANVGR.[Y]			0.00852733	0	1	1	2	BA_0102	BA_0102 [265-272]	0	907.463	2.05206	High	0	0.008474
[K].ELQSLGMDVK.[M]			0.0128799	0	1	1	1	BA_0102	BA_0102 [1133-1142]	0	1119.57	1.86471	High	0	0.01276
[R].ILPYLEK.[N]			0.0964375	0	1	1	1	BA_0102	BA_0102 [318-324]	0	875.524	1.46347	High	0	0.09433
[R].DIPNVGEDALR.[N]			0.0688945	0	1	1	1	BA_0102	BA_0102 [811-821]	0	1198.61	1.47043	High	0	0.0676
[K].HPGIVER.[V]			0.0267101	0	1	1	1	BA_0102	BA_0102 [677-683]	0	807.447	1.41107	High	0	0.02639
[R].LINKETGEVK.[E]			0.0101086	0	1	1	1	BA_0102	BA_0102 [98-107]	1	1130.64	2.59503	High	0	0.01005
[K].YSVDECK.[E]	1xCarbamidomethyl [C6]		0.0312295	0	1	1	1	BA_0102	BA_0102 [76-82]	0	900.377	1.62553	High	0	0.03072
[K].SDDVIGR.[V]			0.0217991	0	1	1	1	BA_0102	BA_0102 [1099-1105]	0	761.379	2.37054	High	0	0.02157
[K].GDLDRYK.[M]			0.0388801	0	1	1	1	BA_0102	BA_0102 [704-710]	1	866.437	1.42437	High	0	0.0382
[R].GENIVTNK.[E]			0.0338356	0	1	1	1	BA_0102	BA_0102 [597-604]	0	874.463	2.23089	High	0	0.03337
[K].YSVDECKER.[D]	1xCarbamidomethyl [C6]		0.0166884	0	1	1	1	BA_0102	BA_0102 [76-84]	1	1185.52	2.17724	High	0	0.01649
[R].DVHYSHYGR.[M]			0.0290662	0	1	1	2	BA_0102	BA_0102 [504-512]	0	1133.51	2.18301	High	0	0.03274
BA_0612	BA_0612 ArsR family transcriptional regulator 626770:627057 forward MW:11215	0	2.82809	15.7895	2	2	2	1	95	11.208	8.53		0.931	2.10309	2
Annotated Sequence	Modifications	Modifications in Master Proteins	Qvality PEP	Qvality q-value	# Protein Groups	# Proteins	# PSMs	Master Protein Accessions	Positions in Master Proteins	# Missed Cleavages	Theo. MH+ [Da]	XCorr Sequest HT	Confidence Sequest HT	Percolator q-Value Sequest HT	Percolator PEP Sequest HT
[R].LVMELMQR.[G]			0.0258215	0	1	1	1	BA_0612	BA_0612 [29-36]	0	1019.54	1.5581	High	0	0.0255
[R].ALAHPLR.[L]			0.0593364	0	1	1	1	BA_0612	BA_0612 [20-26]	0	777.473	2.10309	High	0	0.05826
BA_4508	nfo endonuclease IV 4101017:4101913 reverse MW:32909	0	9.64931	12.0805	5	5	5	1	298	32.888	6.68		0.896	8.36801	5
Annotated Sequence	Modifications	Modifications in Master Proteins	Qvality PEP	Qvality q-value	# Protein Groups	# Proteins	# PSMs	Master Protein Accessions	Positions in Master Proteins	# Missed Cleavages	Theo. MH+ [Da]	XCorr Sequest HT	Confidence Sequest HT	Percolator q-Value Sequest HT	Percolator PEP Sequest HT
[KR].SFEELAK.[QI]			0.0344109	0	1	2	2	BA_4508	BA_4508 [158-164]	0	823.42	1.20407	High	0	0.03383
[K].ILETPYVGEDKK.[D]			0.0336932	0	1	1	1	BA_4508	BA_4508 [258-269]	1	1391.74	2.02892	High	0	0.03321
[K].ILETPYVGEDK.[K]			0.00356382	0	1	1	1	BA_4508	BA_4508 [258-268]	0	1263.65	2.18909	High	0	0.003559
[R].LQVLHINDSK.[N]			0.00460089	0	1	1	1	BA_4508	BA_4508 [211-220]	0	1166.65	2.36782	High	0	0.004589
[K].LEIEMLK.[N]			0.0123441	0	1	1	1	BA_4508	BA_4508 [277-283]	0	875.491	1.78217	High	0	0.01222
BA_5722	ssb-1 single-stranded DNA-binding protein 5213869:5214399 reverse MW:19160	0	4.49605	15.3409	3	3	3	1	176	19.148	5.66		0.874	6.24842	3
Annotated Sequence	Modifications	Modifications in Master Proteins	Qvality PEP	Qvality q-value	# Protein Groups	# Proteins	# PSMs	Master Protein Accessions	Positions in Master Proteins	# Missed Cleavages	Theo. MH+ [Da]	XCorr Sequest HT	Confidence Sequest HT	Percolator q-Value Sequest HT	Percolator PEP Sequest HT
[R].AFANQQGER.[E]			0.0918429	0	1	1	1	BA_5722	BA_5722 [39-47]	0	1020.49	1.7788	High	0	0.08986
[K].KGSLAGVDGR.[L]			0.00357903	0	1	1	1	BA_5722	BA_5722 [70-79]	1	959.527	2.84529	High	0	0.003577
[R].LTKDPDLR.[Y]			0.101656	0	1	1	1	BA_5722	BA_5722 [14-21]	1	957.536	1.62433	High	0	0.09928
BA_4409	accB acetyl-CoA carboxylase biotin carboxyl carrier protein subunit 4022988:4023482 reverse MW:18024	0	4.13658	13.4146	2	2	2	1	164	18.013	4.91		0.778	4.78469	2
Annotated Sequence	Modifications	Modifications in Master Proteins	Qvality PEP	Qvality q-value	# Protein Groups	# Proteins	# PSMs	Master Protein Accessions	Positions in Master Proteins	# Missed Cleavages	Theo. MH+ [Da]	XCorr Sequest HT	Confidence Sequest HT	Percolator q-Value Sequest HT	Percolator PEP Sequest HT
[R].GNEVVAVQAPVAK.[Q]			0.0111945	0	1	1	1	BA_4409	BA_4409 [37-49]	0	1281.72	2.60778	High	0	0.0111
[K].AVQNENLHK.[I]			0.0066062	0	1	1	1	BA_4409	BA_4409 [79-87]	0	1052.55	2.17691	High	0	0.006578
BA_0126	rplR 50S ribosomal protein L18 128585:128947 forward MW:13106	0	3.62688	13.3333	2	2	2	1	120	13.098	10.11		0.778	3.69113	2
Annotated Sequence	Modifications	Modifications in Master Proteins	Qvality PEP	Qvality q-value	# Protein Groups	# Proteins	# PSMs	Master Protein Accessions	Positions in Master Proteins	# Missed Cleavages	Theo. MH+ [Da]	XCorr Sequest HT	Confidence Sequest HT	Percolator q-Value Sequest HT	Percolator PEP Sequest HT
[K].LTGTAERPR.[L]			0.00379882	0	1	1	1	BA_0126	BA_0126 [22-30]	0	1000.55	1.96426	High	0	0.003796
[K].ALAEAAR.[E]			0.0634155	0	1	1	1	BA_0126	BA_0126 [108-114]	0	701.394	1.72688	High	0	0.0622
BA_0118	rpmC 50S ribosomal protein L29 125522:125722 forward MW:7768	0	0.915066	15.1515	1	1	1	1	66	7.763	10.26		0.778	0	1
Annotated Sequence	Modifications	Modifications in Master Proteins	Qvality PEP	Qvality q-value	# Protein Groups	# Proteins	# PSMs	Master Protein Accessions	Positions in Master Proteins	# Missed Cleavages	Theo. MH+ [Da]	XCorr Sequest HT	Confidence Sequest HT	Percolator q-Value Sequest HT	Percolator PEP Sequest HT
[R].ELTTAEIETK.[V]			0.124746	0	1	1	1	BA_0118	BA_0118 [8-17]	0	1134.59	1.11928	High	0	0.1216
BA_3672	BA_3672 DNA polymerase III subunit epsilon 3376139:3377086 reverse MW:36227	0	9.83809	10.1587	4	6	4	1	315	36.204	6.65		0.688	12.6324	4
Annotated Sequence	Modifications	Modifications in Master Proteins	Qvality PEP	Qvality q-value	# Protein Groups	# Proteins	# PSMs	Master Protein Accessions	Positions in Master Proteins	# Missed Cleavages	Theo. MH+ [Da]	XCorr Sequest HT	Confidence Sequest HT	Percolator q-Value Sequest HT	Percolator PEP Sequest HT
[K].AFYPVMR.[L]			0.0846384	0	1	1	1	BA_3672	BA_3672 [220-226]	0	883.449	1.30316	High	0	0.08287
[K].RPIPDR.[I]			0.0235259	0	1	1	2	BA_3672	BA_3672 [52-57]	0	753.437	2.47019	High	0	0.0232
[K].QSEMNADEK.[L]			0.00292998	0	1	1	1	BA_3672	BA_3672 [298-306]	0	1051.44	3.05695	High	0	0.00294
[K].CASIEEEAKR.[K]	1xCarbamidomethyl [C1]		0.0048834	0	1	1	2	BA_3672	BA_3672 [168-177]	1	1192.56	2.90554	High	0	0.005259
BA_3971	topA DNA topoisomerase I 3648303:3650381 reverse MW:79064	0	17.7354	9.82659	9	10	9	1	692	79.014	8.27		0.658	21.2034	9
Annotated Sequence	Modifications	Modifications in Master Proteins	Qvality PEP	Qvality q-value	# Protein Groups	# Proteins	# PSMs	Master Protein Accessions	Positions in Master Proteins	# Missed Cleavages	Theo. MH+ [Da]	XCorr Sequest HT	Confidence Sequest HT	Percolator q-Value Sequest HT	Percolator PEP Sequest HT
[K].CEGMLVEK.[K]	1xCarbamidomethyl [C1]		0.00193866	0	1	1	1	BA_3971	BA_3971 [664-671]	0	965.443	2.34593	High	0	0.001952
[R].VVFNEITK.[D]			0.00641233	0	1	1	1	BA_3971	BA_3971 [108-115]	0	949.535	1.62578	High	0	0.006382
[R].ISETAQTEAR.[T]			0.00289279	0	1	1	1	BA_3971	BA_3971 [306-315]	0	1105.55	2.89908	High	0	0.002902
[K].QHFTQPPPR.[Y]			0.0136692	0	1	1	1	BA_3971	BA_3971 [451-459]	0	1107.57	2.24806	High	0	0.01352
[K].ESFKHPR.[A]			0.0320303	0	1	1	1	BA_3971	BA_3971 [120-126]	1	900.469	1.82656	High	0	0.03152
[R].GYVGLDNKR.[F]			0.0502175	0	1	1	1	BA_3971	BA_3971 [491-499]	1	1021.54	2.08524	High	0	0.04933
[K].CEGMLVEKK.[L]	1xCarbamidomethyl [C1]		0.00972908	0	1	1	2	BA_3971	BA_3971 [664-672]	1	1093.54	2.04906	High	0	0.009659
[R].VQSVAVR.[L]			0.0318955	0	1	1	1	BA_3971	BA_3971 [167-173]	0	758.452	2.1219	High	0	0.03138
[K].VVASMGHVR.[D]			0.00803433	0	1	1	1	BA_3971	BA_3971 [27-35]	0	955.514	2.25666	High	0	0.007984
BA_0137	rpoA DNA-directed RNA polymerase subunit alpha 134311:135255 forward MW:34936	0	7.70731	10.828	4	4	4	1	314	34.914	4.97		0.585	5.95113	4
Annotated Sequence	Modifications	Modifications in Master Proteins	Qvality PEP	Qvality q-value	# Protein Groups	# Proteins	# PSMs	Master Protein Accessions	Positions in Master Proteins	# Missed Cleavages	Theo. MH+ [Da]	XCorr Sequest HT	Confidence Sequest HT	Percolator q-Value Sequest HT	Percolator PEP Sequest HT
[K].IETVELNEDAK.[Y]			0.000500521	0	1	1	1	BA_0137	BA_0137 [9-19]	0	1260.63	2.47146	High	0	0.0005072
[R].SYNCLKR.[A]	1xCarbamidomethyl [C4]		0.0405497	0	1	1	1	BA_0137	BA_0137 [262-268]	1	940.467	1.50133	High	0	0.03986
[R].VTYQVEK.[T]			0.0265974	0	1	1	1	BA_0137	BA_0137 [176-182]	0	866.462	1.84039	High	0	0.0262
[R].GYTPADANK.[S]			0.0375932	0	1	1	1	BA_0137	BA_0137 [147-155]	0	936.442	1.63928	High	0	0.03704
BA_0013	BA_0013 hypothetical protein 21869:22420 forward MW:20635	0	4.40022	4.91803	1	2	1	1	183	20.622	9.57		0.52	4.81416	1
Annotated Sequence	Modifications	Modifications in Master Proteins	Qvality PEP	Qvality q-value	# Protein Groups	# Proteins	# PSMs	Master Protein Accessions	Positions in Master Proteins	# Missed Cleavages	Theo. MH+ [Da]	XCorr Sequest HT	Confidence Sequest HT	Percolator q-Value Sequest HT	Percolator PEP Sequest HT
[K].VLTAVINGK.[E]			0.00378269	0	1	1	1	BA_0013	BA_0013 [137-145]	0	914.567	2.28613	High	0	0.003786
[K].VLTAVINGK.[E]	1xDeamidated [N7]		0.0105926	0	1	1	1	BA_0013	BA_0013 [137-145]	0	915.551	2.52803	High	0	0.01051
BA_3965	rpsB 30S ribosomal protein S2 3642076:3642777 reverse MW:26517	0	4.38682	9.44206	3	3	3	1	233	26.5	9.11		0.501	1.95462	3
Annotated Sequence	Modifications	Modifications in Master Proteins	Qvality PEP	Qvality q-value	# Protein Groups	# Proteins	# PSMs	Master Protein Accessions	Positions in Master Proteins	# Missed Cleavages	Theo. MH+ [Da]	XCorr Sequest HT	Confidence Sequest HT	Percolator q-Value Sequest HT	Percolator PEP Sequest HT
[K].MADAILEAK.[Q]			0.0149444	0	1	1	1	BA_3965	BA_3965 [217-225]	0	961.502	1.47194	High	0	0.01482
[R].LKDIER.[M]			0.0976192	0	1	1	1	BA_3965	BA_3965 [114-119]	1	773.452	1.23992	High	0	0.09532
[R].IAVAEAR.[K]			0.0294369	0	1	1	1	BA_3965	BA_3965 [171-177]	0	729.425	1.95462	High	0	0.02905
BA_0103	rpoC DNA-directed RNA polymerase subunit beta' 111962:115573 forward MW:134433	0	23.6698	9.39318	14	17	14	1	1203	134.347	8.57		0.494	22.0151	14
Annotated Sequence	Modifications	Modifications in Master Proteins	Qvality PEP	Qvality q-value	# Protein Groups	# Proteins	# PSMs	Master Protein Accessions	Positions in Master Proteins	# Missed Cleavages	Theo. MH+ [Da]	XCorr Sequest HT	Confidence Sequest HT	Percolator q-Value Sequest HT	Percolator PEP Sequest HT
[R].MQGVEIGDK.[H]			0.0131565	0	1	1	1	BA_0103	BA_0103 [1056-1064]	0	976.477	1.67331	High	0	0.01305
[K].ELTEGSIDPK.[E]			0.0145685	0	1	1	2	BA_0103	BA_0103 [1022-1031]	0	1088.55	2.08335	High	0	0.0144
[K].SLSHMLK.[G]			0.0863879	0	1	1	1	BA_0103	BA_0103 [315-321]	0	815.444	1.24342	High	0	0.08448
[K].IGLASPDK.[I]			0.077013	0	1	1	1	BA_0103	BA_0103 [12-19]	0	800.451	1.27396	High	0	0.07536
[K].TADSGYLTR.[R]			0.00520535	0	1	1	1	BA_0103	BA_0103 [794-802]	0	983.479	2.55217	High	0	0.005202
[R].SWSYGEVK.[K]			0.114253	0	1	1	1	BA_0103	BA_0103 [22-29]	0	955.452	1.33391	High	0	0.1115
[R].KGLADTALK.[T]			0.000164717	0	1	1	1	BA_0103	BA_0103 [785-793]	1	916.546	3.39347	High	0	0.0001684
[R].KVDLVK.[T]			0.0881715	0	1	1	1	BA_0103	BA_0103 [1181-1186]	1	701.456	2.2377	High	0	0.08617
[R].YKGVVCDR.[C]	1xCarbamidomethyl [C6]		0.0799159	0	1	1	1	BA_0103	BA_0103 [70-77]	1	996.493	1.54756	High	0	0.0782
[K].GLAHNIK.[S]			0.116565	0	1	1	1	BA_0103	BA_0103 [378-384]	0	752.441	1.66271	High	0	0.1136
[R].GLMANPSGR.[I]			0.0433682	0	1	1	1	BA_0103	BA_0103 [749-757]	0	902.451	1.56608	High	0	0.04258
[R].SAFTCNTR.[H]	1xCarbamidomethyl [C5]		0.0881715	0	1	1	1	BA_0103	BA_0103 [888-895]	0	956.425	1.30596	High	0	0.08625
[K].KPETINYR.[T]			0.00655022	0	1	1	2	BA_0103	BA_0103 [30-37]	0	1020.55	2.29279	High	0	0.006519
[R].CGVEVTR.[A]	1xCarbamidomethyl [C1]		0.0380708	0	1	1	1	BA_0103	BA_0103 [78-84]	0	820.398	2.31793	High	0	0.03741
[R].GLMANPSGR.[I]	1xOxidation [M3]		0.0270511	0	1	1	1	BA_0103	BA_0103 [749-757]	0	918.446	1.67682	High	0	0.0267
BA_4182	pdhC branched-chain alpha-keto acid dehydrogenase subunit E2 3828814:3830073 reverse MW:44869	0	8.75004	10.7399	5	6	5	1	419	44.842	5.76		0.487	8.52985	5
Annotated Sequence	Modifications	Modifications in Master Proteins	Qvality PEP	Qvality q-value	# Protein Groups	# Proteins	# PSMs	Master Protein Accessions	Positions in Master Proteins	# Missed Cleavages	Theo. MH+ [Da]	XCorr Sequest HT	Confidence Sequest HT	Percolator q-Value Sequest HT	Percolator PEP Sequest HT
[K].GLLVPVVK.[D]			0.06918	0	1	1	1	BA_4182	BA_4182 [292-299]	0	824.56	1.54673	High	0	0.06763
[K].AQPIPAGEYPETR.[E]			0.00226945	0	1	1	1	BA_4182	BA_4182 [179-191]	0	1428.71	2.84857	High	0	0.002275
[R].IAEKPVVK.[N]			0.0271657	0	1	1	2	BA_4182	BA_4182 [365-372]	0	883.561	1.78823	High	0	0.06382
[R].LAPAEMK.[G]			0.05258	0	1	1	1	BA_4182	BA_4182 [325-331]	0	759.407	1.75469	High	0	0.0517
[R].LIDGATAQK.[A]			0.00838347	0	1	1	1	BA_4182	BA_4182 [392-400]	0	916.51	2.13836	High	0	0.008341
BA_0119	rpsQ 30S ribosomal protein S17 125743:126006 forward MW:10156	0	2.21746	12.6437	1	1	1	1	87	10.151	9.85		0.468	2.52439	1
Annotated Sequence	Modifications	Modifications in Master Proteins	Qvality PEP	Qvality q-value	# Protein Groups	# Proteins	# PSMs	Master Protein Accessions	Positions in Master Proteins	# Missed Cleavages	Theo. MH+ [Da]	XCorr Sequest HT	Confidence Sequest HT	Percolator q-Value Sequest HT	Percolator PEP Sequest HT
[K].IMETRPLSATK.[R]			0.00609309	0	1	1	1	BA_0119	BA_0119 [63-73]	0	1246.68	2.52439	High	0	0.006061
BA_4303	BA_4303 MarR family transcriptional regulator 3930605:3931057 reverse MW:17733	0	1.90904	6	1	1	1	1	150	17.722	9.38		0.468	1.90321	1
Annotated Sequence	Modifications	Modifications in Master Proteins	Qvality PEP	Qvality q-value	# Protein Groups	# Proteins	# PSMs	Master Protein Accessions	Positions in Master Proteins	# Missed Cleavages	Theo. MH+ [Da]	XCorr Sequest HT	Confidence Sequest HT	Percolator q-Value Sequest HT	Percolator PEP Sequest HT
[R].LLQNDINTR.[F]			0.0124495	0	1	1	1	BA_4303	BA_4303 [33-41]	0	1086.59	1.90321	High	0	0.01233
BA_0044	purR pur operon repressor 49025:49873 forward MW:31053	0	4.46174	6.02837	3	3	3	1	282	31.033	5.16		0.438	3.93885	3
Annotated Sequence	Modifications	Modifications in Master Proteins	Qvality PEP	Qvality q-value	# Protein Groups	# Proteins	# PSMs	Master Protein Accessions	Positions in Master Proteins	# Missed Cleavages	Theo. MH+ [Da]	XCorr Sequest HT	Confidence Sequest HT	Percolator q-Value Sequest HT	Percolator PEP Sequest HT
[R].IQTMTLAK.[R]			0.0435506	0	1	1	1	BA_0044	BA_0044 [183-190]	0	905.512	1.52152	High	0	0.04279
[R].LSEVDVK.[E]			0.0736011	0	1	1	1	BA_0044	BA_0044 [252-258]	0	789.435	1.99463	High	0	0.07219
[R].LSEVDVKEK.[A]			0.0112901	0	1	1	1	BA_0044	BA_0044 [252-260]	1	1046.57	1.94422	High	0	0.01118
BA_0110	rplC 50S ribosomal protein L3 121305:121937 forward MW:22692	0	2.58782	5.71429	1	2	1	1	210	22.678	10.02		0.425	0	1
Annotated Sequence	Modifications	Modifications in Master Proteins	Qvality PEP	Qvality q-value	# Protein Groups	# Proteins	# PSMs	Master Protein Accessions	Positions in Master Proteins	# Missed Cleavages	Theo. MH+ [Da]	XCorr Sequest HT	Confidence Sequest HT	Percolator q-Value Sequest HT	Percolator PEP Sequest HT
[K].LTNKPEQGHTAK.[A]			0.0508514	0	1	1	2	BA_0110	BA_0110 [60-71]	0	1323.7	1.73083	High	0	0.05175
BA_4674	rpmA 50S ribosomal protein L27 4250996:4251286 reverse MW:10491	0	1.9307	9.375	1	1	1	1	96	10.485	10.42		0.389	0	1
Annotated Sequence	Modifications	Modifications in Master Proteins	Qvality PEP	Qvality q-value	# Protein Groups	# Proteins	# PSMs	Master Protein Accessions	Positions in Master Proteins	# Missed Cleavages	Theo. MH+ [Da]	XCorr Sequest HT	Confidence Sequest HT	Percolator q-Value Sequest HT	Percolator PEP Sequest HT
[R].GGDDTLYAK.[V]			0.0118305	0	1	1	1	BA_4674	BA_4674 [62-70]	0	939.442	1.21509	High	0	0.01173
BA_4831	polA DNA polymerase I 4392304:4394937 reverse MW:99400	0	13.8879	7.98176	8	8	8	1	877	99.337	5.01		0.374	10.0266	8
Annotated Sequence	Modifications	Modifications in Master Proteins	Qvality PEP	Qvality q-value	# Protein Groups	# Proteins	# PSMs	Master Protein Accessions	Positions in Master Proteins	# Missed Cleavages	Theo. MH+ [Da]	XCorr Sequest HT	Confidence Sequest HT	Percolator q-Value Sequest HT	Percolator PEP Sequest HT
[K].AAAEFIEK.[Y]			0.0191962	0	1	1	1	BA_4831	BA_4831 [732-739]	0	878.462	1.85862	High	0	0.01897
[R].NMGEELAGR.[L]			0.0260409	0	1	1	1	BA_4831	BA_4831 [503-511]	0	976.452	1.55728	High	0	0.02568
[R].FNQVLTQTGR.[L]			0.00494615	0	1	1	1	BA_4831	BA_4831 [607-616]	0	1163.62	2.37203	High	0	0.004944
[R].YIPEITSR.[N]			0.109756	0	1	1	1	BA_4831	BA_4831 [773-780]	0	978.525	1.26668	High	0	0.107
[K].TGYSTSADVLDK.[L]			0.0013385	0	1	1	1	BA_4831	BA_4831 [553-564]	0	1256.6	1.73802	High	0	0.001349
[K].MKETHAVK.[S]			0.0168307	0	1	1	1	BA_4831	BA_4831 [417-424]	1	943.503	1.98585	High	0	0.01668
[K].GVKVDTER.[L]			0.0414106	0	1	1	1	BA_4831	BA_4831 [493-500]	1	903.489	2.07206	High	0	0.04066
[R].KYTFDAK.[R]			0.055976	0	1	1	1	BA_4831	BA_4831 [369-375]	1	872.451	1.25823	High	0	0.0549
BA_0263	BA_0263 redox-sensing transcriptional repressor Rex 256546:257175 forward MW:23501	0	3.06686	6.69856	2	2	2	1	209	23.487	6.4		0.359	1.769	2
Annotated Sequence	Modifications	Modifications in Master Proteins	Qvality PEP	Qvality q-value	# Protein Groups	# Proteins	# PSMs	Master Protein Accessions	Positions in Master Proteins	# Missed Cleavages	Theo. MH+ [Da]	XCorr Sequest HT	Confidence Sequest HT	Percolator q-Value Sequest HT	Percolator PEP Sequest HT
[K].IPQATAK.[R]			0.0448484	0	1	1	1	BA_0263	BA_0263 [6-12]	0	728.43	1.45423	High	0	0.04401
[K].VDSATIR.[R]			0.0196908	0	1	1	1	BA_0263	BA_0263 [43-49]	0	761.415	1.769	High	0	0.01948
BA_0112	rplW 50S ribosomal protein L23 122586:122876 forward MW:11114	0	1.56928	7.29167	1	1	1	1	96	11.107	9.99		0.334	1.87876	1
Annotated Sequence	Modifications	Modifications in Master Proteins	Qvality PEP	Qvality q-value	# Protein Groups	# Proteins	# PSMs	Master Protein Accessions	Positions in Master Proteins	# Missed Cleavages	Theo. MH+ [Da]	XCorr Sequest HT	Confidence Sequest HT	Percolator q-Value Sequest HT	Percolator PEP Sequest HT
[K].RPVITER.[S]			0.0273964	0	1	1	1	BA_0112	BA_0112 [10-16]	0	870.516	1.87876	High	0	0.02696
BA_4483	BA_4483 ArsR family transcriptional regulator 4077603:4078121 forward MW:19973	0	1.49499	4.06977	1	1	1	1	172	19.96	9.16		0.334	2.17385	1
Annotated Sequence	Modifications	Modifications in Master Proteins	Qvality PEP	Qvality q-value	# Protein Groups	# Proteins	# PSMs	Master Protein Accessions	Positions in Master Proteins	# Missed Cleavages	Theo. MH+ [Da]	XCorr Sequest HT	Confidence Sequest HT	Percolator q-Value Sequest HT	Percolator PEP Sequest HT
[K].VLAHPVR.[L]			0.0324383	0	1	2	1	BA_4483	BA_4483 [97-103]	0	791.489	2.17385	High	0	0.03199
BA_5229	BA_5229 hypothetical protein 4742180:4742545 reverse MW:14168	0	0.856049	5.78512	1	1	1	1	121	14.159	6.57		0.334	0	1
Annotated Sequence	Modifications	Modifications in Master Proteins	Qvality PEP	Qvality q-value	# Protein Groups	# Proteins	# PSMs	Master Protein Accessions	Positions in Master Proteins	# Missed Cleavages	Theo. MH+ [Da]	XCorr Sequest HT	Confidence Sequest HT	Percolator q-Value Sequest HT	Percolator PEP Sequest HT
[K].SELPLKK.[F]			0.143238	0	1	1	1	BA_5229	BA_5229 [50-56]	1	814.503	1.41252	High	0.006219	0.1393
BA_4382	bfmbB branched-chain alpha-keto acid dehydrogenase subunit E2 3995335:3996654 reverse MW:47411	0	5.8963	6.15034	3	4	3	1	439	47.381	5.71		0.318	9.44196	3
Annotated Sequence	Modifications	Modifications in Master Proteins	Qvality PEP	Qvality q-value	# Protein Groups	# Proteins	# PSMs	Master Protein Accessions	Positions in Master Proteins	# Missed Cleavages	Theo. MH+ [Da]	XCorr Sequest HT	Confidence Sequest HT	Percolator q-Value Sequest HT	Percolator PEP Sequest HT
[R].KAIAANMLR.[S]			0.0036405	0	1	1	2	BA_4382	BA_4382 [218-226]	1	987.577	3.26445	High	0	0.003645
[R].FSPAVLK.[L]			0.0600815	0	1	1	1	BA_4382	BA_4382 [121-127]	0	761.456	1.56419	High	0	0.05903
[K].AEVNTPEKAPK.[A]			0.00591426	0	1	1	1	BA_4382	BA_4382 [100-110]	1	1183.63	3.06021	High	0	0.005901
BA_2299	rocR-2 arginine utilization regulatory protein RocR 2146046:2147431 forward MW:51853	0	3.98111	5.85683	3	3	3	1	461	51.821	8.7		0.318	3.58358	3
Annotated Sequence	Modifications	Modifications in Master Proteins	Qvality PEP	Qvality q-value	# Protein Groups	# Proteins	# PSMs	Master Protein Accessions	Positions in Master Proteins	# Missed Cleavages	Theo. MH+ [Da]	XCorr Sequest HT	Confidence Sequest HT	Percolator q-Value Sequest HT	Percolator PEP Sequest HT
[K].GVLQMDKEAK.[E]			0.0471618	0	1	1	1	BA_2299	BA_2299 [349-358]	1	1118.59	1.19788	High	0	0.04628
[K].GSYTGAIER.[A]			0.0182436	0	1	1	1	BA_2299	BA_2299 [229-237]	0	953.469	1.83815	High	0	0.01804
[R].VLEDGVIR.[R]			0.128263	0	1	1	1	BA_2299	BA_2299 [268-275]	0	900.515	1.74543	High	0	0.1251
BA_4858	BA_4858 thioesterase 4419865:4421178 reverse MW:48730	0	5.05811	6.40732	3	3	3	1	437	48.699	7.02		0.292	6.74194	3
Annotated Sequence	Modifications	Modifications in Master Proteins	Qvality PEP	Qvality q-value	# Protein Groups	# Proteins	# PSMs	Master Protein Accessions	Positions in Master Proteins	# Missed Cleavages	Theo. MH+ [Da]	XCorr Sequest HT	Confidence Sequest HT	Percolator q-Value Sequest HT	Percolator PEP Sequest HT
[K].DLSVSEGTAYR.[A]			0.0487682	0	1	1	1	BA_4858	BA_4858 [29-39]	0	1197.57	2.19826	High	0	0.04784
[K].VLGIVTSK.[D]			0.00924504	0	1	1	1	BA_4858	BA_4858 [234-241]	0	816.519	2.23173	High	0	0.009184
[R].YPIVDENKK.[V]			0.0201127	0	1	1	1	BA_4858	BA_4858 [225-233]	1	1105.59	2.31195	High	0	0.01991
BA_0138	rplQ 50S ribosomal protein L17 135291:135653 forward MW:13449	0	1.09253	12.5	1	1	1	1	120	13.441	10.48		0.292	0	1
Annotated Sequence	Modifications	Modifications in Master Proteins	Qvality PEP	Qvality q-value	# Protein Groups	# Proteins	# PSMs	Master Protein Accessions	Positions in Master Proteins	# Missed Cleavages	Theo. MH+ [Da]	XCorr Sequest HT	Confidence Sequest HT	Percolator q-Value Sequest HT	Percolator PEP Sequest HT
[R].NEVANAETGQDALQK.[L]			0.0825831	0	1	1	1	BA_0138	BA_0138 [68-82]	0	1587.76	1.53432	High	0	0.08081
BA_3805	BA_3805 prophage LambdaBa01, acyltransferase 3489827:3492457 reverse MW:101260	0	7.12357	5.3653	6	6	6	1	876	101.196	6.16		0.274	4.25184	6
Annotated Sequence	Modifications	Modifications in Master Proteins	Qvality PEP	Qvality q-value	# Protein Groups	# Proteins	# PSMs	Master Protein Accessions	Positions in Master Proteins	# Missed Cleavages	Theo. MH+ [Da]	XCorr Sequest HT	Confidence Sequest HT	Percolator q-Value Sequest HT	Percolator PEP Sequest HT
[R].LGNQYHLER.[L]			0.124746	0	1	1	1	BA_3805	BA_3805 [94-102]	0	1129.57	1.12285	High	0	0.1214
[R].VQPITIR.[-]			0.0669271	0	1	1	1	BA_3805	BA_3805 [870-876]	0	826.515	1.88509	High	0	0.06547
[R].EFNLHEK.[L]			0.0357409	0	1	1	1	BA_3805	BA_3805 [44-50]	0	916.452	1.30035	High	0	0.03524
[K].LKLNEGK.[N]			0.0677636	0	1	1	1	BA_3805	BA_3805 [574-580]	1	801.483	1.06555	High	0	0.06634
[K].CIVHGEDPK.[Q]	1xCarbamidomethyl [C1]		0.0410641	0	1	1	1	BA_3805	BA_3805 [329-337]	0	1054.5	2.36674	High	0	0.04041
[K].KVNVDELK.[L]			0.102482	0	1	1	1	BA_3805	BA_3805 [501-508]	1	944.541	1.23609	High	0	0.1002
BA_0125	rplF 50S ribosomal protein L6 128014:128553 forward MW:19515	0	1.67613	3.91061	1	1	1	1	179	19.504	9.39		0.259	1.62919	1
Annotated Sequence	Modifications	Modifications in Master Proteins	Qvality PEP	Qvality q-value	# Protein Groups	# Proteins	# PSMs	Master Protein Accessions	Positions in Master Proteins	# Missed Cleavages	Theo. MH+ [Da]	XCorr Sequest HT	Confidence Sequest HT	Percolator q-Value Sequest HT	Percolator PEP Sequest HT
[R].YEGEVVR.[R]			0.0213422	0	1	1	1	BA_0125	BA_0125 [165-171]	0	851.426	1.62919	High	0	0.02108
BA_0880	BA_0880 hypothetical protein 889289:889660 forward MW:14867	0	2.04206	8.94309	1	1	1	1	123	14.858	8.51		0.233	2.69605	1
Annotated Sequence	Modifications	Modifications in Master Proteins	Qvality PEP	Qvality q-value	# Protein Groups	# Proteins	# PSMs	Master Protein Accessions	Positions in Master Proteins	# Missed Cleavages	Theo. MH+ [Da]	XCorr Sequest HT	Confidence Sequest HT	Percolator q-Value Sequest HT	Percolator PEP Sequest HT
[K].KPSEEQVEQLK.[R]			0.00912784	0	1	1	1	BA_0880	BA_0880 [87-97]	0	1314.69	2.69605	High	0	0.009077
BA_2546	BA_2546 hypothetical protein 2369189:2370157 forward MW:37583	0	2.88219	4.34783	2	2	2	1	322	37.559	9		0.222	1.61836	2
Annotated Sequence	Modifications	Modifications in Master Proteins	Qvality PEP	Qvality q-value	# Protein Groups	# Proteins	# PSMs	Master Protein Accessions	Positions in Master Proteins	# Missed Cleavages	Theo. MH+ [Da]	XCorr Sequest HT	Confidence Sequest HT	Percolator q-Value Sequest HT	Percolator PEP Sequest HT
[K].IYSGFEK.[A]			0.0181664	0	1	1	1	BA_2546	BA_2546 [116-122]	0	843.425	1.61836	High	0	0.01797
[K].LVQPSTR.[E]			0.0745171	0	1	1	1	BA_2546	BA_2546 [70-76]	0	800.462	1.34121	High	0	0.07299
BA_4385	bfmbC dihydrolipoamide dehydrogenase 3998696:4000117 reverse MW:50775	0	2.51062	2.95983	2	2	2	1	473	50.742	5.78		0.194	1.72577	2
Annotated Sequence	Modifications	Modifications in Master Proteins	Qvality PEP	Qvality q-value	# Protein Groups	# Proteins	# PSMs	Master Protein Accessions	Positions in Master Proteins	# Missed Cleavages	Theo. MH+ [Da]	XCorr Sequest HT	Confidence Sequest HT	Percolator q-Value Sequest HT	Percolator PEP Sequest HT
[K].MLVSVGR.[Q]			0.0739052	0	1	1	1	BA_4385	BA_4385 [274-280]	0	761.434	1.23157	High	0	0.07237
[K].IVTQLHK.[G]			0.0433682	0	1	1	1	BA_4385	BA_4385 [90-96]	0	838.515	1.72577	High	0	0.04264
BA_0122	rplE 50S ribosomal protein L5 126795:127334 forward MW:20177	0	1.43818	5.02793	1	1	1	1	179	20.165	9.7		0.194	0	1
Annotated Sequence	Modifications	Modifications in Master Proteins	Qvality PEP	Qvality q-value	# Protein Groups	# Proteins	# PSMs	Master Protein Accessions	Positions in Master Proteins	# Missed Cleavages	Theo. MH+ [Da]	XCorr Sequest HT	Confidence Sequest HT	Percolator q-Value Sequest HT	Percolator PEP Sequest HT
[K].EITPALVSK.[F]			0.0371215	0	1	1	1	BA_0122	BA_0122 [11-19]	0	957.562	1.49579	High	0	0.03646
BA_2287	racA polar chromosome segregation protein 2133885:2134427 reverse MW:21293	0	1.41987	7.77778	1	1	1	1	180	21.28	8.28		0.194	2.00068	1
Annotated Sequence	Modifications	Modifications in Master Proteins	Qvality PEP	Qvality q-value	# Protein Groups	# Proteins	# PSMs	Master Protein Accessions	Positions in Master Proteins	# Missed Cleavages	Theo. MH+ [Da]	XCorr Sequest HT	Confidence Sequest HT	Percolator q-Value Sequest HT	Percolator PEP Sequest HT
[R].SQIEQSQNTHPTQK.[T]			0.0387169	0	1	1	1	BA_2287	BA_2287 [54-67]	0	1625.79	2.00068	High	0	0.03803
BA_4838	citC isocitrate dehydrogenase 4400025:4401317 reverse MW:46955	0	3.72939	4.18605	2	2	2	1	430	46.925	5.15		0.166	0	2
Annotated Sequence	Modifications	Modifications in Master Proteins	Qvality PEP	Qvality q-value	# Protein Groups	# Proteins	# PSMs	Master Protein Accessions	Positions in Master Proteins	# Missed Cleavages	Theo. MH+ [Da]	XCorr Sequest HT	Confidence Sequest HT	Percolator q-Value Sequest HT	Percolator PEP Sequest HT
[R].SSVTLVHK.[G]			0.0361954	0	1	1	1	BA_4838	BA_4838 [214-221]	0	870.504	1.48906	High	0	0.03564
[K].AMADAEVAGK.[I]			0.00524985	0	1	1	1	BA_4838	BA_4838 [269-278]	0	962.461	1.37333	High	0	0.005232
BA_3813	BA_3813 prophage LambdaBa01, thymidylate synthase-complementing protein 3495997:3496755 reverse MW:28177	0	1.04832	8.73016	1	1	1	1	252	28.16	8.75		0.166	0	1
Annotated Sequence	Modifications	Modifications in Master Proteins	Qvality PEP	Qvality q-value	# Protein Groups	# Proteins	# PSMs	Master Protein Accessions	Positions in Master Proteins	# Missed Cleavages	Theo. MH+ [Da]	XCorr Sequest HT	Confidence Sequest HT	Percolator q-Value Sequest HT	Percolator PEP Sequest HT
[K].GAQAEIAELAEQLRQEVVKVEK.[W]			0.0914694	0	1	1	1	BA_3813	BA_3813 [217-238]	2	2438.32	0.491058	High	0	0.08947
BA_0113	rplB 50S ribosomal protein L2 122905:123735 forward MW:30253	0	1.08386	3.98551	1	1	1	1	276	30.234	10.73		0.145	0	1
Annotated Sequence	Modifications	Modifications in Master Proteins	Qvality PEP	Qvality q-value	# Protein Groups	# Proteins	# PSMs	Master Protein Accessions	Positions in Master Proteins	# Missed Cleavages	Theo. MH+ [Da]	XCorr Sequest HT	Confidence Sequest HT	Percolator q-Value Sequest HT	Percolator PEP Sequest HT
[R].SAGTSAQVLGK.[E]			0.0842925	0	1	1	1	BA_0113	BA_0113 [157-167]	0	1018.55	1.45177	High	0	0.08244
BA_4387	BA_4387 leucine dehydrogenase 4001313:4002413 reverse MW:39851	0	1.35458	2.18579	1	1	1	1	366	39.826	5.27		0.129	0	1
Annotated Sequence	Modifications	Modifications in Master Proteins	Qvality PEP	Qvality q-value	# Protein Groups	# Proteins	# PSMs	Master Protein Accessions	Positions in Master Proteins	# Missed Cleavages	Theo. MH+ [Da]	XCorr Sequest HT	Confidence Sequest HT	Percolator q-Value Sequest HT	Percolator PEP Sequest HT
[R].NGHDIISR.[R]			0.0450369	0	1	1	1	BA_4387	BA_4387 [358-365]	0	911.469	1.18148	High	0	0.0442
BA_0006	gyrA DNA gyrase subunit A 6595:9066 forward MW:92338	0	4.8651	2.79465	3	3	3	1	823	92.28	5.74		0.126	4.221	3
Annotated Sequence	Modifications	Modifications in Master Proteins	Qvality PEP	Qvality q-value	# Protein Groups	# Proteins	# PSMs	Master Protein Accessions	Positions in Master Proteins	# Missed Cleavages	Theo. MH+ [Da]	XCorr Sequest HT	Confidence Sequest HT	Percolator q-Value Sequest HT	Percolator PEP Sequest HT
[R].IVGEVIGK.[Y]			0.0278636	0	1	1	1	BA_0006	BA_0006 [71-78]	0	814.503	1.34781	High	0	0.02747
[R].MAQDFSQR.[Y]			0.0172647	0	1	1	1	BA_0006	BA_0006 [94-101]	0	982.441	2.34263	High	0	0.01709
[R].FNEQDVR.[S]			0.0294369	0	1	1	1	BA_0006	BA_0006 [674-680]	0	907.427	1.87837	High	0	0.02906
BA_4839	citZ citrate synthase 4401478:4402593 reverse MW:41784	0	0.918293	2.15633	1	1	1	1	371	41.757	5.57		0.116	0	1
Annotated Sequence	Modifications	Modifications in Master Proteins	Qvality PEP	Qvality q-value	# Protein Groups	# Proteins	# PSMs	Master Protein Accessions	Positions in Master Proteins	# Missed Cleavages	Theo. MH+ [Da]	XCorr Sequest HT	Confidence Sequest HT	Percolator q-Value Sequest HT	Percolator PEP Sequest HT
[R].VYEQGDPR.[A]			0.123757	0	1	1	1	BA_4839	BA_4839 [259-266]	0	963.453	1.45631	High	0	0.1207
BA_1584	BA_1584 hypothetical protein 1489623:1490762 forward MW:43107	0	0.888066	6.0686	1	1	1	1	379	43.08	6.25		0.116	0	1
Annotated Sequence	Modifications	Modifications in Master Proteins	Qvality PEP	Qvality q-value	# Protein Groups	# Proteins	# PSMs	Master Protein Accessions	Positions in Master Proteins	# Missed Cleavages	Theo. MH+ [Da]	XCorr Sequest HT	Confidence Sequest HT	Percolator q-Value Sequest HT	Percolator PEP Sequest HT
[R].IEIAMLKDIATLTIDASGVGLHK.[R]			0.132916	0	1	1	1	BA_1584	BA_1584 [140-162]	1	2409.34	0.19645	High	0	0.1294
BA_0108	tuf elongation factor Tu 119376:120563 forward MW:42939	0	1.30751	1.77215	1	1	1	1	395	42.912	5.01		0.11	0	1
Annotated Sequence	Modifications	Modifications in Master Proteins	Qvality PEP	Qvality q-value	# Protein Groups	# Proteins	# PSMs	Master Protein Accessions	Positions in Master Proteins	# Missed Cleavages	Theo. MH+ [Da]	XCorr Sequest HT	Confidence Sequest HT	Percolator q-Value Sequest HT	Percolator PEP Sequest HT
[R].EHILLSR.[Q]			0.0502175	0	1	1	1	BA_0108	BA_0108 [118-124]	0	867.505	1.51974	High	0	0.04926
BA_3944	pnp polynucleotide phosphorylase/polyadenylase 3619458:3621596 reverse MW:78209	0	2.62002	2.10674	2	2	2	1	712	78.16	5.26		0.105	0	2
Annotated Sequence	Modifications	Modifications in Master Proteins	Qvality PEP	Qvality q-value	# Protein Groups	# Proteins	# PSMs	Master Protein Accessions	Positions in Master Proteins	# Missed Cleavages	Theo. MH+ [Da]	XCorr Sequest HT	Confidence Sequest HT	Percolator q-Value Sequest HT	Percolator PEP Sequest HT
[R].EDAINEVK.[K]			0.0435506	0	1	1	1	BA_3944	BA_3944 [267-274]	0	917.457	0.963406	High	0	0.04285
[K].IVKEEVR.[R]			0.0571544	0	1	1	1	BA_3944	BA_3944 [301-307]	1	872.52	1.58597	High	0	0.05598
BA_4515	sigA RNA polymerase sigma factor RpoD 4108218:4109339 reverse MW:43038	0	1.35037	1.87668	1	1	1	1	373	43.011	4.93		0.105	1.86665	1
Annotated Sequence	Modifications	Modifications in Master Proteins	Qvality PEP	Qvality q-value	# Protein Groups	# Proteins	# PSMs	Master Protein Accessions	Positions in Master Proteins	# Missed Cleavages	Theo. MH+ [Da]	XCorr Sequest HT	Confidence Sequest HT	Percolator q-Value Sequest HT	Percolator PEP Sequest HT
[R].FGLDDGR.[T]			0.0454162	0	1	1	1	BA_4515	BA_4515 [324-330]	0	779.368	1.86665	High	0	0.04463
BA_2107	fhs formate--tetrahydrofolate ligase 1965220:1966908 forward MW:60489	0	2.00577	1.9573	1	1	1	1	562	60.451	5.63		0.08	1.97952	1
Annotated Sequence	Modifications	Modifications in Master Proteins	Qvality PEP	Qvality q-value	# Protein Groups	# Proteins	# PSMs	Master Protein Accessions	Positions in Master Proteins	# Missed Cleavages	Theo. MH+ [Da]	XCorr Sequest HT	Confidence Sequest HT	Percolator q-Value Sequest HT	Percolator PEP Sequest HT
[K].GGQGGVDLAEK.[V]			0.00993815	0	1	1	1	BA_2107	BA_2107 [418-428]	0	1030.52	1.97952	High	0	0.009868
BA_0267	groEL chaperonin GroEL 258866:260500 forward MW:57432	0	1.0792	1.83824	1	1	1	1	544	57.396	4.84		0.075	0	1
Annotated Sequence	Modifications	Modifications in Master Proteins	Qvality PEP	Qvality q-value	# Protein Groups	# Proteins	# PSMs	Master Protein Accessions	Positions in Master Proteins	# Missed Cleavages	Theo. MH+ [Da]	XCorr Sequest HT	Confidence Sequest HT	Percolator q-Value Sequest HT	Percolator PEP Sequest HT
[K].VGAATETELK.[E]			0.0853342	0	1	1	1	BA_0267	BA_0267 [379-388]	0	1018.54	1.49172	High	0	0.08333
BA_2818	recQ-2 ATP-dependent DNA helicase RecQ 2612435:2614552 reverse MW:80352	0	2.28676	1.2766	1	1	1	1	705	80.3	5.44		0.054	1.97448	1
Annotated Sequence	Modifications	Modifications in Master Proteins	Qvality PEP	Qvality q-value	# Protein Groups	# Proteins	# PSMs	Master Protein Accessions	Positions in Master Proteins	# Missed Cleavages	Theo. MH+ [Da]	XCorr Sequest HT	Confidence Sequest HT	Percolator q-Value Sequest HT	Percolator PEP Sequest HT
[R].QTIENHLIR.[C]			0.00518324	0	1	1	1	BA_2818	BA_2818 [640-648]	0	1123.62	1.97448	High	0	0.005167
BA_3955	polC DNA polymerase III PolC 3629390:3633691 reverse MW:161660	0	3.35234	1.39567	2	2	2	1	1433	161.556	5.41		0.052	1.8596	2
Annotated Sequence	Modifications	Modifications in Master Proteins	Qvality PEP	Qvality q-value	# Protein Groups	# Proteins	# PSMs	Master Protein Accessions	Positions in Master Proteins	# Missed Cleavages	Theo. MH+ [Da]	XCorr Sequest HT	Confidence Sequest HT	Percolator q-Value Sequest HT	Percolator PEP Sequest HT
[R].GSVQNDTFVR.[D]			0.00731647	0	1	1	1	BA_3955	BA_3955 [295-304]	0	1122.55	1.8596	High	0	0.007287
[R].AGTIGTVAEK.[T]			0.0621126	0	1	1	1	BA_3955	BA_3955 [991-1000]	0	946.52	1.52181	High	0	0.06097
BA_5437	BA_5437 BigG family transcription antiterminator 4924678:4927353 forward MW:102286	0	1.14527	0.785634	1	1	1	1	891	102.22	5.99		0.05	1.74882	1
Annotated Sequence	Modifications	Modifications in Master Proteins	Qvality PEP	Qvality q-value	# Protein Groups	# Proteins	# PSMs	Master Protein Accessions	Positions in Master Proteins	# Missed Cleavages	Theo. MH+ [Da]	XCorr Sequest HT	Confidence Sequest HT	Percolator q-Value Sequest HT	Percolator PEP Sequest HT
[K].YEELQAR.[G]			0.0729964	0	1	1	1	BA_5437	BA_5437 [388-394]	0	908.447	1.74882	High	0	0.07157
BA_4157	pyc pyruvate carboxylase 3808980:3812426 reverse MW:128575	0	1.03508	0.87108	1	1	1	1	1148	128.493	5.96		0.03	0	1
Annotated Sequence	Modifications	Modifications in Master Proteins	Qvality PEP	Qvality q-value	# Protein Groups	# Proteins	# PSMs	Master Protein Accessions	Positions in Master Proteins	# Missed Cleavages	Theo. MH+ [Da]	XCorr Sequest HT	Confidence Sequest HT	Percolator q-Value Sequest HT	Percolator PEP Sequest HT
[R].EIVVKDESVK.[A]			0.0944976	0	1	1	1	BA_4157	BA_4157 [1055-1064]	1	1145.64	1.59862	High	0	0.09224

## Sheet: T8
In vitro promoter pull-down proteins list at T8
Accession	Description	Exp. q-value	Sum PEP Score	Coverage	# Peptides	# PSMs	# Unique Peptides	# Protein Groups	# AAs	MW [kDa]	calc. pI	emPAI	Score Sequest HT	# Peptides Sequest HT
BA_3858	hup-3 DNA-binding protein HU 3530483:3530755 forward MW:9729	0	32.0052	40	4	10	3	1	90	9.723	9.13	99	26.6387	4
Annotated Sequence	Modifications	Modifications in Master Proteins	Qvality PEP	Qvality q-value	# Protein Groups	# Proteins	# PSMs	Master Protein Accessions	Positions in Master Proteins	# Missed Cleavages	Theo. MH+ [Da]	Confidence Sequest HT	Percolator q-Value Sequest HT	Percolator PEP Sequest HT
[R].NPQTGEEMQIAASK.[V]			0.000587737	0	1	1	2	BA_3858	BA_3858 [62-75]	0	1503.71	High	0	0.0003274
[R].NPQTGEEMQIAASK.[V]	1xOxidation [M8]		0.000341602	0	1	1	1	BA_3858	BA_3858 [62-75]	0	1519.71	High	0	0.0001832
[K].NVAQNAEISQK.[E]			0.000328009	0	1	1	2	BA_3858	BA_3858 [9-19]	0	1201.62	High	0	0.0001748
[R].TGRNPQTGEEMQIAASK.[V]			1.26103e-08	0	1	1	2	BA_3858	BA_3858 [59-75]	1	1817.88	High	0	3.137e-09
[-].MNKTELIK.[N]			0.00352056	0	2	2	1	BA_2377; BA_3858	BA_2377 [1-8]; BA_3858 [1-8]	1	976.55	High	0	0.002251
[-].MNKTELIK.[N]	1xOxidation [M1]		0.00741642	0	2	2	1	BA_2377; BA_3858	BA_2377 [1-8]; BA_3858 [1-8]	1	992.544	High	0	0.005004
[K].NVAQNAEISQK.[E]	1xDeamidated [N5]		0.0721275	0.00305894	1	1	1	BA_3858	BA_3858 [9-19]	0	1202.6	High	0.002546	0.05839
BA_2377	hup-2 DNA-binding protein HU 2216729:2217001 reverse MW:9591	0	20.5236	40	4	6	3	1	90	9.586	9.13	16.783	17.1564	4
Annotated Sequence	Modifications	Modifications in Master Proteins	Qvality PEP	Qvality q-value	# Protein Groups	# Proteins	# PSMs	Master Protein Accessions	Positions in Master Proteins	# Missed Cleavages	Theo. MH+ [Da]	Confidence Sequest HT	Percolator q-Value Sequest HT	Percolator PEP Sequest HT
[K].NVAQSADISQK.[D]			0.000432636	0	1	1	1	BA_2377	BA_2377 [9-19]	0	1160.59	High	0	0.0002361
[R].NPQTGEEIQIAAGK.[V]			0.000303542	0	1	1	2	BA_2377	BA_2377 [62-75]	0	1455.74	High	0	0.0001611
[R].TGRNPQTGEEIQIAAGK.[V]			2.65809e-08	0	1	1	1	BA_2377	BA_2377 [59-75]	1	1769.91	High	0	6.991e-09
[-].MNKTELIK.[N]			0.00352056	0	2	2	1	BA_2377; BA_3858	BA_2377 [1-8]; BA_3858 [1-8]	1	976.55	High	0	0.002251
[-].MNKTELIK.[N]	1xOxidation [M1]		0.00741642	0	2	2	1	BA_2377; BA_3858	BA_2377 [1-8]; BA_3858 [1-8]	1	992.544	High	0	0.005004
BA_1531	hup-1 DNA-binding protein HU 1447107:1447379 forward MW:9642	0	22.1015	35.5556	5	13	5	1	90	9.636	9.31	14.849	38.4998	5
Annotated Sequence	Modifications	Modifications in Master Proteins	Qvality PEP	Qvality q-value	# Protein Groups	# Proteins	# PSMs	Master Protein Accessions	Positions in Master Proteins	# Missed Cleavages	Theo. MH+ [Da]	Confidence Sequest HT	Percolator q-Value Sequest HT	Percolator PEP Sequest HT
[R].NPQTGEEIEIAASK.[V]			5.84547e-06	0	1	1	4	BA_1531	BA_1531 [62-75]	0	1486.74	High	0	2.306e-06
[R].KGRNPQTGEEIEIAASK.[V]			0.000403332	0	1	1	1	BA_1531	BA_1531 [59-75]	2	1827.96	High	0	0.0002188
[K].GRNPQTGEEIEIAASK.[V]			1.35127e-05	0	1	1	3	BA_1531	BA_1531 [60-75]	1	1699.86	High	0	1.735e-05
[K].VPAFKPGK.[A]			0.0172301	0	1	1	4	BA_1531	BA_1531 [76-83]	0	843.509	High	0	0.01238
[K].ALKDAVK.[-]			0.14899	0.00305894	1	1	1	BA_1531	BA_1531 [84-90]	1	744.461	High	0.002546	0.1289
BA_3982	rpsP 30S ribosomal protein S16 3658251:3658523 reverse MW:10117	0	8.9036	41.1111	4	6	4	1	90	10.111	10.14	14.849	12.6056	4
Annotated Sequence	Modifications	Modifications in Master Proteins	Qvality PEP	Qvality q-value	# Protein Groups	# Proteins	# PSMs	Master Protein Accessions	Positions in Master Proteins	# Missed Cleavages	Theo. MH+ [Da]	Confidence Sequest HT	Percolator q-Value Sequest HT	Percolator PEP Sequest HT
[K].WLGNGAKPSDTVR.[N]	1xDeamidated [N4]		0.000346683	0	1	1	1	BA_3982	BA_3982 [59-71]	0	1401.71	High	0	0.0001859
[R].NLFSNQGIMEK.[F]			0.0505576	0	1	1	1	BA_3982	BA_3982 [72-82]	0	1280.63	High	0	0.03961
[R].NLFSNQGIMEK.[F]	1xOxidation [M9]		0.137789	0.00305894	1	1	1	BA_3982	BA_3982 [72-82]	0	1296.63	High	0.002546	0.118
[R].VVVADSR.[S]			0.163704	0.00305894	1	1	1	BA_3982	BA_3982 [20-26]	0	745.42	High	0.002546	0.143
[K].WLGNGAKPSDTVR.[N]			0.0579762	0.00305894	1	1	1	BA_3982	BA_3982 [59-71]	0	1400.73	High	0.002546	0.04603
[K].KTPFYR.[V]			0.239898	0.0084257	1	1	1	BA_3982	BA_3982 [14-19]	1	811.446	High	0.007067	0.2183
BA_4724	gerE germination protein GerE 4296461:4296685 reverse MW:8498	0	13.9831	52.7027	4	11	4	1	74	8.493	9.41	9	16.4235	4
Annotated Sequence	Modifications	Modifications in Master Proteins	Qvality PEP	Qvality q-value	# Protein Groups	# Proteins	# PSMs	Master Protein Accessions	Positions in Master Proteins	# Missed Cleavages	Theo. MH+ [Da]	Confidence Sequest HT	Percolator q-Value Sequest HT	Percolator PEP Sequest HT
[K].AYQSKPLLTK.[R]			0.0234487	0	1	1	4	BA_4724	BA_4724 [5-14]	0	1148.67	High	0.002546	0.07477
[R].SQAVVELLR.[M]			0.00169536	0	1	1	3	BA_4724	BA_4724 [60-68]	0	1014.59	High	0	0.03837
[R].NHISNAMQK.[L]	1xDeamidated [N1]		0.0061451	0	1	1	1	BA_4724	BA_4724 [45-53]	0	1043.49	High	0	0.004094
[K].EIAGELFISEK.[T]			0.00730786	0	1	1	1	BA_4724	BA_4724 [31-41]	0	1235.65	High	0	0.004937
[R].NHISNAMQK.[L]			0.00175911	0	1	1	2	BA_4724	BA_4724 [45-53]	0	1042.51	High	0	0.001065
BA_1012	BA_1012 3'-5' exoribonuclease YhaM 1003757:1004701 forward MW:35500	0	51.5774	33.758	14	48	14	1	314	35.478	6.29	7.962	84.5605	14
Annotated Sequence	Modifications	Modifications in Master Proteins	Qvality PEP	Qvality q-value	# Protein Groups	# Proteins	# PSMs	Master Protein Accessions	Positions in Master Proteins	# Missed Cleavages	Theo. MH+ [Da]	Confidence Sequest HT	Percolator q-Value Sequest HT	Percolator PEP Sequest HT
[K].APVKKEDMVEK.[I]			8.77343e-06	0	1	1	6	BA_1012	BA_1012 [105-115]	2	1273.68	High	0	0.0004227
[K].AEWGSPKPPLVK.[E]			9.28115e-05	0	1	1	3	BA_1012	BA_1012 [254-265]	0	1308.73	High	0	4.512e-05
[K].QYVAETIVK.[V]			0.00925184	0	1	1	2	BA_1012	BA_1012 [60-68]	0	1050.58	High	0	0.006341
[R].VFALDNR.[S]			0.0323469	0	1	1	2	BA_1012	BA_1012 [299-305]	0	834.447	High	0	0.02448
[K].VAGDILNYKGR.[I]			0.000291464	0	1	1	2	BA_1012	BA_1012 [69-79]	1	1205.66	High	0	0.0001544
[R].SFYKPSFHN.[-]			0.00720089	0	1	1	3	BA_1012	BA_1012 [306-314]	0	1126.53	High	0	0.004854
[K].MNMMDR.[A]	1xOxidation [M]		0.0487636	0	1	1	13	BA_1012	BA_1012 [280-285]	0	813.305	High	0.002546	0.08499
[K].KEDMVEK.[I]			0.0161275	0	1	1	1	BA_1012	BA_1012 [109-115]	1	878.429	High	0	0.01157
[R].TKPGEYTER.[V]			0.0396619	0	1	1	2	BA_1012	BA_1012 [290-298]	0	1080.53	High	0	0.04093
[K].LWDVSPEVEK.[Q]			0.000699085	0	1	1	2	BA_1012	BA_1012 [50-59]	0	1201.61	High	0	0.0003943
[K].VAGDILNYK.[G]			0.00530224	0	1	1	2	BA_1012	BA_1012 [69-77]	0	992.541	High	0	0.003496
[K].HQNEFLDYPAATK.[N]			9.68454e-09	0	1	1	6	BA_1012	BA_1012 [139-151]	0	1533.73	High	0	2.35959e-09
[K].VAGDILNYK.[G]	1xDeamidated [N7]		0.178476	0.00305894	1	1	1	BA_1012	BA_1012 [69-77]	0	993.525	High	0.002546	0.1572
[K].EDMVEK.[I]			0.176715	0.00305894	1	1	1	BA_1012	BA_1012 [110-115]	0	750.334	High	0.002546	0.1557
[K].MNMMDR.[A]	1xDeamidated [N2]		0.163704	0.00305894	1	1	1	BA_1012	BA_1012 [280-285]	0	798.294	High	0.002546	0.1429
[K].ITQYIFEMR.[N]			0.0879837	0.00305894	1	1	1	BA_1012	BA_1012 [116-124]	0	1200.61	High	0.002546	0.07237
BA_5521	spoIIID stage III sporulation protein D 5013220:5013618 reverse MW:15588	0	24.1383	14.3939	6	26	6	1	132	15.578	9.95	7.111	59.3251	6
Annotated Sequence	Modifications	Modifications in Master Proteins	Qvality PEP	Qvality q-value	# Protein Groups	# Proteins	# PSMs	Master Protein Accessions	Positions in Master Proteins	# Missed Cleavages	Theo. MH+ [Da]	Confidence Sequest HT	Percolator q-Value Sequest HT	Percolator PEP Sequest HT
[K].EILDYHK.[S]			0.0559278	0	1	1	4	BA_5521	BA_5521 [100-106]	0	917.473	High	0.002546	0.1194
[K].YRKEDVEKPVR.[Q]			0.0014201	0	1	1	4	BA_5521	BA_5521 [121-131]	2	1418.78	High	0	0.0008465
[K].EDVEKPVRQ.[-]			0.00128066	0	1	1	6	BA_5521	BA_5521 [124-132]	1	1099.57	High	0	0.0007573
[K].EDVEKPVR.[Q]			0.0265564	0	1	1	2	BA_5521	BA_5521 [124-131]	0	971.516	High	0	0.0198
[R].KEDVEKPVR.[Q]			0.001248	0	1	1	4	BA_5521	BA_5521 [123-131]	1	1099.61	High	0	0.0007371
[R].KEDVEKPVRQ.[-]			0.000292541	0	1	1	6	BA_5521	BA_5521 [123-132]	2	1227.67	High	0	0.0001551
BA_4534	rpsU 30S ribosomal protein S21 4122482:4122655 reverse MW:6772	0	4.32976	31.5789	2	2	2	1	57	6.769	11.09	3.642	5.24645	2
Annotated Sequence	Modifications	Modifications in Master Proteins	Qvality PEP	Qvality q-value	# Protein Groups	# Proteins	# PSMs	Master Protein Accessions	Positions in Master Proteins	# Missed Cleavages	Theo. MH+ [Da]	Confidence Sequest HT	Percolator q-Value Sequest HT	Percolator PEP Sequest HT
[R].KNESLEDALR.[R]			0.00317498	0	1	1	1	BA_4534	BA_4534 [8-17]	1	1174.61	High	0	0.002012
[K].TGTLAEAR.[K]			0.0308484	0	1	1	1	BA_4534	BA_4534 [26-33]	0	818.437	High	0	0.02326
BA_0123	rpsN 30S ribosomal protein S14 127368:127553 forward MW:7263	0	1.43523	21.3115	2	2	2	1	61	7.259	10.37	3.642	1.79151	2
Annotated Sequence	Modifications	Modifications in Master Proteins	Qvality PEP	Qvality q-value	# Protein Groups	# Proteins	# PSMs	Master Protein Accessions	Positions in Master Proteins	# Missed Cleavages	Theo. MH+ [Da]	Confidence Sequest HT	Percolator q-Value Sequest HT	Percolator PEP Sequest HT
[K].VQEYTR.[C]			0.193728	0.00578174	1	1	1	BA_0123	BA_0123 [18-23]	0	795.4	High	0.004827	0.1721
[K].GQIPGVK.[K]			0.234706	0.0084257	1	1	1	BA_0123	BA_0123 [51-57]	0	698.42	High	0.007067	0.2133
BA_3996	rpmB 50S ribosomal protein L28 3674419:3674607 forward MW:6953	0	2.87263	22.5806	2	2	2	1	62	6.949	12.02	2.162	3.36229	2
Annotated Sequence	Modifications	Modifications in Master Proteins	Qvality PEP	Qvality q-value	# Protein Groups	# Proteins	# PSMs	Master Protein Accessions	Positions in Master Proteins	# Missed Cleavages	Theo. MH+ [Da]	Confidence Sequest HT	Percolator q-Value Sequest HT	Percolator PEP Sequest HT
[K].WGANLQK.[V]			0.0374207	0	1	1	1	BA_3996	BA_3996 [29-35]	0	816.436	High	0	0.02865
[R].VCTITGR.[K]	1xCarbamidomethyl [C2]		0.0588158	0.00305894	1	1	1	BA_3996	BA_3996 [4-10]	0	806.419	High	0.002546	0.0468
BA_4620	BA_4620 hypothetical protein 4197516:4197644 reverse MW:4816	0	2.48718	16.6667	1	1	1	1	42	4.814	10.8	2.162	2.6382	1
Annotated Sequence	Modifications	Modifications in Master Proteins	Qvality PEP	Qvality q-value	# Protein Groups	# Proteins	# PSMs	Master Protein Accessions	Positions in Master Proteins	# Missed Cleavages	Theo. MH+ [Da]	Confidence Sequest HT	Percolator q-Value Sequest HT	Percolator PEP Sequest HT
[R].KQDVFSK.[R]			0.00497996	0	1	1	1	BA_4620	BA_4620 [22-28]	1	851.462	High	0	0.003257
BA_0134	rpmJ 50S ribosomal protein L36 133216:133329 forward MW:4333	0	2.32597	24.3243	1	1	1	1	37	4.33	10.46	2.162	2.18653	1
Annotated Sequence	Modifications	Modifications in Master Proteins	Qvality PEP	Qvality q-value	# Protein Groups	# Proteins	# PSMs	Master Protein Accessions	Positions in Master Proteins	# Missed Cleavages	Theo. MH+ [Da]	Confidence Sequest HT	Percolator q-Value Sequest HT	Percolator PEP Sequest HT
[K].VMVICENPK.[H]	1xCarbamidomethyl [C5]		0.00701743	0	1	1	1	BA_0134	BA_0134 [23-31]	0	1089.54	High	0	0.004721
BA_0102	rpoB DNA-directed RNA polymerase subunit beta 108391:111924 forward MW:131875	0	57.1583	20.9856	32	39	32	1	1177	131.791	5.1	1.888	74.668	32
Annotated Sequence	Modifications	Modifications in Master Proteins	Qvality PEP	Qvality q-value	# Protein Groups	# Proteins	# PSMs	Master Protein Accessions	Positions in Master Proteins	# Missed Cleavages	Theo. MH+ [Da]	Confidence Sequest HT	Percolator q-Value Sequest HT	Percolator PEP Sequest HT
[R].LRPGEPPTVENAK.[S]			0.00828358	0	1	1	2	BA_0102	BA_0102 [240-252]	0	1407.76	High	0	0.006528
[K].IYAPESEGER.[V]			0.0337935	0	1	1	1	BA_0102	BA_0102 [349-358]	0	1150.54	High	0	0.02569
[R].TGEPFDNR.[V]			0.0466924	0	1	1	1	BA_0102	BA_0102 [1021-1028]	0	935.422	High	0	0.03633
[R].RYVEVDGQTVK.[G]			0.00850006	0	1	1	1	BA_0102	BA_0102 [693-703]	1	1293.68	High	0	0.005808
[R].YDLANVGR.[Y]			0.0213958	0	1	1	1	BA_0102	BA_0102 [265-272]	0	907.463	High	0	0.01564
[K].ERIDYMDVSPK.[Q]			0.0209302	0	1	1	1	BA_0102	BA_0102 [605-615]	1	1352.65	High	0	0.0153
[K].LGPEEITR.[D]			0.0256024	0	1	1	2	BA_0102	BA_0102 [803-810]	0	914.494	High	0	0.04487
[R].YVEVDGQTVK.[G]			0.00464287	0	1	1	1	BA_0102	BA_0102 [694-703]	0	1137.58	High	0	0.003025
[K].TILYDGR.[T]			0.0539493	0	1	1	1	BA_0102	BA_0102 [1014-1020]	0	837.446	High	0	0.0426
[K].ELQSLGMDVK.[M]			0.0551281	0	1	1	1	BA_0102	BA_0102 [1133-1142]	0	1119.57	High	0	0.04357
[K].RYDLANVGR.[Y]			0.0168545	0	1	1	1	BA_0102	BA_0102 [264-272]	1	1063.56	High	0	0.01213
[K].GVTELTAEER.[L]			0.00572925	0	1	1	2	BA_0102	BA_0102 [849-858]	0	1104.55	High	0	0.003796
[K].ISEGDKMAGR.[H]			0.00354664	0	1	1	1	BA_0102	BA_0102 [918-927]	1	1063.52	High	0	0.002263
[R].ALMGANMQR.[Q]			0.0164266	0	1	1	1	BA_0102	BA_0102 [636-644]	0	991.481	High	0	0.01181
[R].ALMGANMQR.[Q]	2xOxidation [M3; M7]		0.0569431	0	1	1	1	BA_0102	BA_0102 [636-644]	0	1023.47	High	0	0.04505
[R].KISEGDKMAGR.[H]			0.00151207	0	1	1	1	BA_0102	BA_0102 [917-927]	2	1191.62	High	0	0.0009073
[K].YSVDECKER.[D]	1xCarbamidomethyl [C6]		0.0366126	0	1	1	1	BA_0102	BA_0102 [76-84]	1	1185.52	High	0	0.02792
[R].VIVSQLVR.[S]			0.0270465	0	1	1	1	BA_0102	BA_0102 [133-140]	0	913.583	High	0	0.02018
[R].GENIVTNK.[E]			0.0346666	0	1	1	1	BA_0102	BA_0102 [597-604]	0	874.463	High	0	0.02633
[R].DVHYSHYGR.[M]			0.0168545	0	1	1	3	BA_0102	BA_0102 [504-512]	0	1133.51	High	0	0.01211
[R].LINKETGEVK.[E]			0.0336706	0	1	1	1	BA_0102	BA_0102 [98-107]	1	1130.64	High	0	0.02558
[K].MMSSDDTEIEMR.[D]			0.029634	0	1	1	2	BA_0102	BA_0102 [1143-1154]	0	1444.58	High	0	0.02226
[R].VINVIGNANITR.[D]			0.0723851	0.00305894	1	1	1	BA_0102	BA_0102 [359-370]	0	1283.74	High	0.002546	0.05845
[R].ILPYLEK.[N]			0.112445	0.00305894	1	1	1	BA_0102	BA_0102 [318-324]	0	875.524	High	0.002546	0.0946
[R].DIPNVGEDALR.[N]			0.0937466	0.00305894	1	1	1	BA_0102	BA_0102 [811-821]	0	1198.61	High	0.002546	0.0775
[K].DGDLLVGK.[V]			0.0822648	0.00305894	1	1	1	BA_0102	BA_0102 [837-844]	0	816.446	High	0.002546	0.06726
[K].GDLDRYK.[M]			0.149495	0.00305894	1	1	1	BA_0102	BA_0102 [704-710]	1	866.437	High	0.002546	0.1292
[K].HPGIVER.[V]			0.112445	0.00305894	1	1	1	BA_0102	BA_0102 [677-683]	0	807.447	High	0.002546	0.09452
[K].YSVDECK.[E]	1xCarbamidomethyl [C6]		0.0886071	0.00305894	1	1	1	BA_0102	BA_0102 [76-82]	0	900.377	High	0.002546	0.07296
[R].FRGENIVTNK.[E]			0.0796809	0.00305894	1	1	1	BA_0102	BA_0102 [595-604]	1	1177.63	High	0.002546	0.06494
[K].TYEAIVK.[G]			0.13826	0.00305894	1	1	1	BA_0102	BA_0102 [1108-1114]	0	823.456	High	0.002546	0.1185
[R].AYIVQK.[R]			0.130002	0.00305894	1	1	1	BA_0102	BA_0102 [910-915]	0	721.424	High	0.002546	0.111
[K].SDDVIGR.[V]			0.10747	0.00305894	1	1	1	BA_0102	BA_0102 [1099-1105]	0	761.379	High	0.002546	0.08991
BA_0612	BA_0612 ArsR family transcriptional regulator 626770:627057 forward MW:11215	0	4.54949	26.3158	3	3	3	1	95	11.208	8.53	1.683	5.92803	3
Annotated Sequence	Modifications	Modifications in Master Proteins	Qvality PEP	Qvality q-value	# Protein Groups	# Proteins	# PSMs	Master Protein Accessions	Positions in Master Proteins	# Missed Cleavages	Theo. MH+ [Da]	Confidence Sequest HT	Percolator q-Value Sequest HT	Percolator PEP Sequest HT
[R].ISEEDVQMLR.[A]	1xOxidation [M8]		0.00214709	0	1	1	1	BA_0612	BA_0612 [10-19]	0	1235.59	High	0	0.00132
[R].LVMELMQR.[G]			0.134533	0.00305894	1	1	1	BA_0612	BA_0612 [29-36]	0	1019.54	High	0.002546	0.1153
[R].ALAHPLR.[L]			0.207358	0.00578174	1	1	1	BA_0612	BA_0612 [20-26]	0	777.473	High	0.004827	0.1854
BA_4189	BA_4189 hypothetical protein 3835007:3835219 forward MW:8189	0	3.09649	24.2857	2	2	2	1	70	8.184	5.38	1.512	2.40506	2
Annotated Sequence	Modifications	Modifications in Master Proteins	Qvality PEP	Qvality q-value	# Protein Groups	# Proteins	# PSMs	Master Protein Accessions	Positions in Master Proteins	# Missed Cleavages	Theo. MH+ [Da]	Confidence Sequest HT	Percolator q-Value Sequest HT	Percolator PEP Sequest HT
[K].MTEVPVRENTK.[V]			0.00592261	0	1	1	1	BA_4189	BA_4189 [11-21]	1	1303.67	High	0	0.003935
[K].VFYQEK.[M]			0.225293	0.00578174	1	1	1	BA_4189	BA_4189 [5-10]	0	813.414	High	0.004827	0.2035
BA_5395	uvrA excinuclease ABC subunit A 4884257:4887133 reverse MW:106453	0	50.5827	19.833	19	25	19	1	958	106.385	6.52	1.448	55.7377	19
Annotated Sequence	Modifications	Modifications in Master Proteins	Qvality PEP	Qvality q-value	# Protein Groups	# Proteins	# PSMs	Master Protein Accessions	Positions in Master Proteins	# Missed Cleavages	Theo. MH+ [Da]	Confidence Sequest HT	Percolator q-Value Sequest HT	Percolator PEP Sequest HT
[R].ETSSDYIR.[E]			0.0310744	0	1	1	1	BA_5395	BA_5395 [389-396]	0	970.448	High	0	0.02339
[R].YVNEFGQVK.[E]			0.00192915	0	1	1	1	BA_5395	BA_5395 [362-370]	0	1083.55	High	0	0.001177
[R].LATQIGSR.[L]			0.00859455	0	1	1	1	BA_5395	BA_5395 [499-506]	0	845.484	High	0	0.005874
[R].DVFAQTNEAK.[V]			0.00496163	0	1	1	1	BA_5395	BA_5395 [713-722]	0	1122.54	High	0	0.003244
[K].GGQIVASGTPEQVVKEER.[S]			0.0328222	0	1	1	1	BA_5395	BA_5395 [912-929]	1	1883.98	High	0	0.02489
[K].LGQPATTLSGGEAQR.[V]			5.71742e-06	0	1	1	3	BA_5395	BA_5395 [823-837]	0	1485.77	High	0	2.249e-06
[K].SKDFIVVK.[G]			0.0364796	0	1	1	1	BA_5395	BA_5395 [4-11]	1	935.556	High	0	0.02782
[R].NQLVVVTGLSGSGK.[S]			0.000275764	0	1	1	1	BA_5395	BA_5395 [28-41]	0	1358.76	High	0	0.0001454
[K].VIDIDQSPIGR.[T]			0.00688925	0	1	1	1	BA_5395	BA_5395 [685-695]	0	1212.66	High	0	0.004627
[R].LADSLESALK.[L]			0.000581265	0	1	1	1	BA_5395	BA_5395 [221-230]	0	1046.57	High	0	0.0003245
[K].EFIPVPLER.[R]			0.0415792	0	1	1	1	BA_5395	BA_5395 [598-606]	0	1099.61	High	0	0.03213
[K].STMINEVLYK.[S]	1xOxidation [M3]		0.017421	0	1	1	1	BA_5395	BA_5395 [648-657]	0	1213.61	High	0	0.01257
[K].STMINEVLYK.[S]			0.00859455	0	1	1	1	BA_5395	BA_5395 [648-657]	0	1197.62	High	0	0.00587
[R].AAGTLSGGEAQR.[I]			0.000261874	0	1	1	1	BA_5395	BA_5395 [485-496]	0	1117.56	High	0	0.0001372
[R].LLEVLQR.[L]			0.0539493	0	1	1	2	BA_5395	BA_5395 [871-877]	0	870.541	High	0	0.0426
[K].YMAEQACPK.[C]	1xCarbamidomethyl [C7]		0.000508933	0	1	1	1	BA_5395	BA_5395 [402-410]	0	1097.48	High	0	0.0002809
[K].YMAEQACPK.[C]	1xOxidation [M2]; 1xCarbamidomethyl [C7]		0.0026206	0	1	1	1	BA_5395	BA_5395 [402-410]	0	1113.47	High	0	0.001634
[R].KVEIVGAK.[E]			0.00921782	0	1	1	2	BA_5395	BA_5395 [613-620]	1	843.53	High	0	0.006326
[R].YVESLSAYAR.[Q]			0.0314165	0	1	1	1	BA_5395	BA_5395 [57-66]	0	1158.58	High	0	0.02373
[K].VLEDIKK.[Q]			0.0849284	0.00305894	1	1	1	BA_5395	BA_5395 [169-175]	1	844.514	High	0.002546	0.06959
[K].LASELHR.[R]			0.242149	0.0084257	1	1	1	BA_5395	BA_5395 [840-846]	0	825.458	High	0.007067	0.2206
BA_0103	rpoC DNA-directed RNA polymerase subunit beta' 111962:115573 forward MW:134433	0	50.2474	19.7007	28	38	28	1	1203	134.347	8.57	1.356	59.3377	28
Annotated Sequence	Modifications	Modifications in Master Proteins	Qvality PEP	Qvality q-value	# Protein Groups	# Proteins	# PSMs	Master Protein Accessions	Positions in Master Proteins	# Missed Cleavages	Theo. MH+ [Da]	Confidence Sequest HT	Percolator q-Value Sequest HT	Percolator PEP Sequest HT
[K].IGLASPDK.[I]			0.00432858	0	1	1	1	BA_0103	BA_0103 [12-19]	0	800.451	High	0	0.002809
[R].SWSYGEVK.[K]			0.0496527	0	1	1	1	BA_0103	BA_0103 [22-29]	0	955.452	High	0	0.03884
[R].KGLADTALK.[T]			9.21288e-05	0	1	1	2	BA_0103	BA_0103 [785-793]	1	916.546	High	0	4.464e-05
[R].MQGVEIGDK.[H]			0.00189387	0	1	1	1	BA_0103	BA_0103 [1056-1064]	0	976.477	High	0	0.001156
[R].LKVIPGQK.[I]			0.0232775	0	1	1	2	BA_0103	BA_0103 [1009-1016]	1	882.577	High	0	0.01714
[K].QLLSEKEYR.[A]			0.0167927	0	1	1	1	BA_0103	BA_0103 [148-156]	1	1165.62	High	0	0.01208
[R].TLKPEKDGLFCER.[I]	1xCarbamidomethyl [C11]		0.0032701	0	1	1	2	BA_0103	BA_0103 [38-50]	1	1592.81	High	0.002546	0.1249
[R].NPIFMMSDSGAR.[G]	1xOxidation [M]		0.00783805	0	1	1	2	BA_0103	BA_0103 [724-735]	0	1341.59	High	0	0.005308
[K].TADSGYLTR.[R]			0.0122849	0	1	1	1	BA_0103	BA_0103 [794-802]	0	983.479	High	0	0.008624
[K].NMLLLTTVGK.[L]	1xOxidation [M2]		0.0134192	0	1	1	1	BA_0103	BA_0103 [555-564]	0	1105.63	High	0	0.009493
[K].NMLLLTTVGK.[L]			0.0100699	0	1	1	1	BA_0103	BA_0103 [555-564]	0	1089.63	High	0	0.006948
[K].RVDYSGR.[S]			0.0189562	0	1	1	1	BA_0103	BA_0103 [335-341]	1	852.432	High	0	0.01376
[R].EGAIGEGMVFK.[D]			0.0290977	0	1	1	1	BA_0103	BA_0103 [507-517]	0	1137.56	High	0	0.02179
[K].KPETINYR.[T]			0.00628258	0	1	1	1	BA_0103	BA_0103 [30-37]	0	1020.55	High	0	0.004185
[R].GLMANPSGR.[I]			0.052795	0	1	1	1	BA_0103	BA_0103 [749-757]	0	902.451	High	0	0.04157
[K].RDELLGLK.[E]			0.0799641	0.00305894	1	1	1	BA_0103	BA_0103 [1154-1161]	1	943.557	High	0.002546	0.06527
[R].MGLVLDMSPR.[A]	1xOxidation [M1]		0.0752769	0.00305894	1	1	1	BA_0103	BA_0103 [114-123]	0	1134.56	High	0.002546	0.06098
[K].DGLFCER.[I]	1xCarbamidomethyl [C5]		0.0944085	0.00305894	1	1	1	BA_0103	BA_0103 [44-50]	0	896.393	High	0.002546	0.07807
[R].NPIFMMSDSGAR.[G]			0.0892347	0.00305894	1	1	1	BA_0103	BA_0103 [724-735]	0	1325.6	High	0.002546	0.07357
[K].DWECHCGK.[Y]	2xCarbamidomethyl [C4; C6]		0.058185	0.00305894	1	1	1	BA_0103	BA_0103 [57-64]	0	1091.4	High	0.002546	0.04613
[K].LVPAGTGMNR.[Y]	1xOxidation [M8]		0.1201	0.00305894	1	1	1	BA_0103	BA_0103 [1169-1178]	0	1031.53	High	0.002546	0.1016
[R].YKGVVCDR.[C]	1xCarbamidomethyl [C6]		0.179066	0.00305894	1	1	1	BA_0103	BA_0103 [70-77]	1	996.493	High	0.002546	0.1579
[K].GLAHNIK.[S]			0.0960824	0.00305894	1	1	2	BA_0103	BA_0103 [378-384]	0	752.441	High	0.002546	0.09251
[R].CGVEVTR.[A]	1xCarbamidomethyl [C1]		0.0788368	0.00305894	1	1	1	BA_0103	BA_0103 [78-84]	0	820.398	High	0.002546	0.06417
[K].EHPVLLNR.[A]			0.0889203	0.00305894	1	1	1	BA_0103	BA_0103 [407-414]	0	977.553	High	0.002546	0.0733
[K].SLSHMLK.[G]			0.0937466	0.00305894	1	1	1	BA_0103	BA_0103 [315-321]	0	815.444	High	0.002546	0.07746
[K].ELTEGSIDPK.[E]			0.155671	0.00305894	1	1	2	BA_0103	BA_0103 [1022-1031]	0	1088.55	High	0.002546	0.1353
[R].SVIVVGPNLK.[M]			0.226006	0.00578174	1	1	1	BA_0103	BA_0103 [342-351]	0	1025.64	High	0.004827	0.2041
[K].MYQCGLPK.[E]	1xCarbamidomethyl [C4]		0.195629	0.00578174	1	1	1	BA_0103	BA_0103 [352-359]	0	996.464	High	0.004827	0.174
[K].LVPAGTGMNR.[Y]			0.2296	0.00578174	1	1	1	BA_0103	BA_0103 [1169-1178]	0	1015.54	High	0.004827	0.2075
[R].GLMANPSGR.[I]	1xOxidation [M3]		0.182041	0.00578174	1	1	1	BA_0103	BA_0103 [749-757]	0	918.446	High	0.004827	0.1605
[R].KVDLVK.[T]			0.210716	0.00578174	1	1	1	BA_0103	BA_0103 [1181-1186]	1	701.456	High	0.004827	0.1891
BA_0044	purR pur operon repressor 49025:49873 forward MW:31053	0	11.6632	12.766	6	8	6	1	282	31.033	5.16	1.336	13.334	6
Annotated Sequence	Modifications	Modifications in Master Proteins	Qvality PEP	Qvality q-value	# Protein Groups	# Proteins	# PSMs	Master Protein Accessions	Positions in Master Proteins	# Missed Cleavages	Theo. MH+ [Da]	Confidence Sequest HT	Percolator q-Value Sequest HT	Percolator PEP Sequest HT
[R].QPIDAVMTVATK.[G]	1xOxidation [M7]		0.0501937	0	1	1	1	BA_0044	BA_0044 [129-140]	0	1289.68	High	0	0.03932
[R].IQTMTLAK.[R]			0.0360834	0	1	1	1	BA_0044	BA_0044 [183-190]	0	905.512	High	0	0.02753
[R].QPIDAVMTVATK.[G]			0.00317498	0	1	1	2	BA_0044	BA_0044 [129-140]	0	1273.68	High	0	0.00201
[K].EKAIQVEK.[G]			0.0207772	0	1	1	1	BA_0044	BA_0044 [259-266]	1	944.541	High	0	0.01517
[R].LSEVDVKEK.[A]			0.0169165	0	1	1	1	BA_0044	BA_0044 [252-260]	1	1046.57	High	0	0.01216
[K].RIQTMTLAK.[R]			0.0892347	0.00305894	1	1	1	BA_0044	BA_0044 [182-190]	1	1061.61	High	0.002546	0.07336
[R].LSEVDVK.[E]			0.08955	0.00305894	1	1	1	BA_0044	BA_0044 [252-258]	0	789.435	High	0.002546	0.07376
BA_0013	BA_0013 hypothetical protein 21869:22420 forward MW:20635	0	11.9324	13.6612	3	4	3	1	183	20.622	9.57	1.31	11.2305	3
Annotated Sequence	Modifications	Modifications in Master Proteins	Qvality PEP	Qvality q-value	# Protein Groups	# Proteins	# PSMs	Master Protein Accessions	Positions in Master Proteins	# Missed Cleavages	Theo. MH+ [Da]	Confidence Sequest HT	Percolator q-Value Sequest HT	Percolator PEP Sequest HT
[K].VLTAVINGK.[E]			0.00895008	0	1	1	1	BA_0013	BA_0013 [137-145]	0	914.567	High	0	0.006137
[K].VLTAVINGK.[E]	1xDeamidated [N7]		0.00115491	0	1	1	1	BA_0013	BA_0013 [137-145]	0	915.551	High	0	0.0006776
[R].INAGKSESEIIAPTK.[K]			0.000130827	0	1	1	1	BA_0013	BA_0013 [167-181]	1	1557.85	High	0	6.517e-05
[K].SESEIIAPTKK.[K]			0.00644686	0	1	1	1	BA_0013	BA_0013 [172-182]	1	1202.66	High	0	0.004311
BA_4547	rpsT 30S ribosomal protein S20 4136602:4136859 forward MW:9341	0	2.74521	11.7647	1	1	1	1	85	9.336	10.67	1.154	2.53945	1
Annotated Sequence	Modifications	Modifications in Master Proteins	Qvality PEP	Qvality q-value	# Protein Groups	# Proteins	# PSMs	Master Protein Accessions	Positions in Master Proteins	# Missed Cleavages	Theo. MH+ [Da]	Confidence Sequest HT	Percolator q-Value Sequest HT	Percolator PEP Sequest HT
[K].GLIHQNAAAR.[Q]			0.0028633	0	1	1	1	BA_4547	BA_4547 [65-74]	0	1050.58	High	0	0.001798
BA_4818	rpmI 50S ribosomal protein L35 4380413:4380613 reverse MW:7495	0.015873	1.17855	15.1515	1	1	1	1	66	7.491	11.93	1.154	1.8404	1
Annotated Sequence	Modifications	Modifications in Master Proteins	Qvality PEP	Qvality q-value	# Protein Groups	# Proteins	# PSMs	Master Protein Accessions	Positions in Master Proteins	# Missed Cleavages	Theo. MH+ [Da]	Confidence Sequest HT	Percolator q-Value Sequest HT	Percolator PEP Sequest HT
[K].AGVVSAGDFK.[R]			0.0811067	0.00305894	1	1	1	BA_4818	BA_4818 [47-56]	0	950.494	High	0.002546	0.06629
BA_3971	topA DNA topoisomerase I 3648303:3650381 reverse MW:79064	0	24.1548	16.6185	12	13	12	1	692	79.014	8.27	1.075	24.7366	12
Annotated Sequence	Modifications	Modifications in Master Proteins	Qvality PEP	Qvality q-value	# Protein Groups	# Proteins	# PSMs	Master Protein Accessions	Positions in Master Proteins	# Missed Cleavages	Theo. MH+ [Da]	Confidence Sequest HT	Percolator q-Value Sequest HT	Percolator PEP Sequest HT
[R].GYVGLDNKR.[F]			0.0186799	0	1	1	1	BA_3971	BA_3971 [491-499]	1	1021.54	High	0	0.01352
[K].CEGMLVEK.[K]	1xCarbamidomethyl [C1]		0.0172301	0	1	1	1	BA_3971	BA_3971 [664-671]	0	965.443	High	0	0.01241
[K].VYVESKDDGAEEKDK.[M]			0.00393265	0	1	1	2	BA_3971	BA_3971 [417-431]	2	1711.8	High	0	0.0098
[K].DNAFSVENVTR.[K]			0.0112462	0	1	1	1	BA_3971	BA_3971 [233-243]	0	1251.6	High	0	0.007833
[R].ISETAQTEAR.[T]			0.00373466	0	1	1	1	BA_3971	BA_3971 [306-315]	0	1105.55	High	0	0.002398
[R].AINMDLVDAQQAR.[R]			0.0100699	0	1	1	1	BA_3971	BA_3971 [127-139]	0	1444.72	High	0	0.006956
[K].CDKGQIIER.[R]	1xCarbamidomethyl [C1]		0.0187486	0	1	1	1	BA_3971	BA_3971 [622-630]	1	1118.56	High	0	0.01359
[R].VVFNEITK.[D]			0.0161275	0	1	1	1	BA_3971	BA_3971 [108-115]	0	949.535	High	0	0.01155
[K].QHFTQPPPR.[Y]			0.0162465	0	1	1	1	BA_3971	BA_3971 [451-459]	0	1107.57	High	0	0.01165
[R].VQSVAVR.[L]			0.0937466	0.00305894	1	1	1	BA_3971	BA_3971 [167-173]	0	758.452	High	0.002546	0.07764
[K].ESFKHPR.[A]			0.0988186	0.00305894	1	1	1	BA_3971	BA_3971 [120-126]	1	900.469	High	0.002546	0.08226
[K].VVASMGHVR.[D]			0.129112	0.00305894	1	1	1	BA_3971	BA_3971 [27-35]	0	955.514	High	0.002546	0.1103
BA_0137	rpoA DNA-directed RNA polymerase subunit alpha 134311:135255 forward MW:34936	0	13.9128	17.5159	6	6	6	1	314	34.914	4.97	0.995	13.0939	6
Annotated Sequence	Modifications	Modifications in Master Proteins	Qvality PEP	Qvality q-value	# Protein Groups	# Proteins	# PSMs	Master Protein Accessions	Positions in Master Proteins	# Missed Cleavages	Theo. MH+ [Da]	Confidence Sequest HT	Percolator q-Value Sequest HT	Percolator PEP Sequest HT
[R].VGQVANYDK.[L]			0.000574863	0	1	1	1	BA_0137	BA_0137 [185-193]	0	993.5	High	0	0.0003204
[R].GYGTTLGNSLR.[R]			0.033426	0	1	1	1	BA_0137	BA_0137 [31-41]	0	1138.59	High	0	0.02538
[K].IETVELNEDAK.[Y]			9.04439e-05	0	1	1	1	BA_0137	BA_0137 [9-19]	0	1260.63	High	0	4.383e-05
[R].GYTPADANK.[S]			0.0117541	0	1	1	1	BA_0137	BA_0137 [147-155]	0	936.442	High	0	0.008223
[K].FVIEPLER.[G]			0.073949	0.00305894	1	1	1	BA_0137	BA_0137 [23-30]	0	1002.56	High	0.002546	0.05991
[R].VTYQVEK.[T]			0.0849284	0.00305894	1	1	1	BA_0137	BA_0137 [176-182]	0	866.462	High	0.002546	0.06962
BA_5722	ssb-1 single-stranded DNA-binding protein 5213869:5214399 reverse MW:19160	0	4.85535	17.0455	3	3	3	1	176	19.148	5.66	0.874	6.57948	3
Annotated Sequence	Modifications	Modifications in Master Proteins	Qvality PEP	Qvality q-value	# Protein Groups	# Proteins	# PSMs	Master Protein Accessions	Positions in Master Proteins	# Missed Cleavages	Theo. MH+ [Da]	Confidence Sequest HT	Percolator q-Value Sequest HT	Percolator PEP Sequest HT
[R].KQAENVANYLK.[K]			0.0460212	0	1	1	1	BA_5722	BA_5722 [59-69]	1	1277.68	High	0	0.0358
[R].AFANQQGER.[E]			0.0067884	0	1	1	1	BA_5722	BA_5722 [39-47]	0	1020.49	High	0	0.004554
[K].KGSLAGVDGR.[L]			0.1027	0.00305894	1	1	1	BA_5722	BA_5722 [70-79]	1	959.527	High	0.002546	0.08558
BA_3944	pnp polynucleotide phosphorylase/polyadenylase 3619458:3621596 reverse MW:78209	0	32.578	14.8876	12	12	12	1	712	78.16	5.26	0.823	25.9501	12
Annotated Sequence	Modifications	Modifications in Master Proteins	Qvality PEP	Qvality q-value	# Protein Groups	# Proteins	# PSMs	Master Protein Accessions	Positions in Master Proteins	# Missed Cleavages	Theo. MH+ [Da]	Confidence Sequest HT	Percolator q-Value Sequest HT	Percolator PEP Sequest HT
[R].THGSGLFTR.[G]			0.00467725	0	1	1	1	BA_3944	BA_3944 [338-346]	0	975.501	High	0	0.003051
[K].IGDVITVK.[V]			0.0268494	0	1	1	1	BA_3944	BA_3944 [669-676]	0	844.514	High	0	0.02002
[R].YGDTAVLSTATASK.[E]			5.88879e-06	0	1	1	1	BA_3944	BA_3944 [36-49]	0	1384.7	High	0	2.322e-06
[K].VIEIDKQGR.[V]			0.0157179	0	1	1	1	BA_3944	BA_3944 [677-685]	1	1057.6	High	0	0.01122
[R].TELSAYAPK.[I]			0.00108067	0	1	1	1	BA_3944	BA_3944 [547-555]	0	979.509	High	0	0.0006298
[K].QANGAVLVR.[Y]	1xDeamidated [N3]		0.029526	0	1	1	1	BA_3944	BA_3944 [27-35]	0	928.521	High	0	0.0222
[R].QLTVETGQLAK.[Q]			3.17013e-05	0	1	1	1	BA_3944	BA_3944 [16-26]	0	1187.66	High	0	1.419e-05
[R].KVLLKEEQEK.[E]			0.000147775	0	1	1	1	BA_3944	BA_3944 [691-700]	2	1243.73	High	0	7.434e-05
[R].EVQVGEIYEGK.[V]			0.00231157	0	1	1	1	BA_3944	BA_3944 [619-629]	0	1250.63	High	0	0.001432
[K].VLLKEEQEK.[E]			0.00676341	0	1	1	1	BA_3944	BA_3944 [692-700]	1	1115.63	High	0	0.004537
[K].QVFSIDLAGR.[Q]			0.126476	0.00305894	1	1	1	BA_3944	BA_3944 [6-15]	0	1105.6	High	0.002546	0.1075
[RK].ILTVEK.[IE]			0.182641	0.00578174	1	2	2	BA_3944	BA_3944 [309-314]	0	702.44	High	0.004827	0.1612
BA_4409	accB acetyl-CoA carboxylase biotin carboxyl carrier protein subunit 4022988:4023482 reverse MW:18024	0	3.52222	13.4146	2	2	2	1	164	18.013	4.91	0.778	2.26309	2
Annotated Sequence	Modifications	Modifications in Master Proteins	Qvality PEP	Qvality q-value	# Protein Groups	# Proteins	# PSMs	Master Protein Accessions	Positions in Master Proteins	# Missed Cleavages	Theo. MH+ [Da]	Confidence Sequest HT	Percolator q-Value Sequest HT	Percolator PEP Sequest HT
[R].GNEVVAVQAPVAK.[Q]			0.00221142	0	1	1	1	BA_4409	BA_4409 [37-49]	0	1281.72	High	0	0.001362
[K].AVQNENLHK.[I]			0.242149	0.0084257	1	1	1	BA_4409	BA_4409 [79-87]	0	1052.55	High	0.007067	0.2206
BA_0126	rplR 50S ribosomal protein L18 128585:128947 forward MW:13106	0	2.83497	12.5	2	2	2	1	120	13.098	10.11	0.778	3.65625	2
Annotated Sequence	Modifications	Modifications in Master Proteins	Qvality PEP	Qvality q-value	# Protein Groups	# Proteins	# PSMs	Master Protein Accessions	Positions in Master Proteins	# Missed Cleavages	Theo. MH+ [Da]	Confidence Sequest HT	Percolator q-Value Sequest HT	Percolator PEP Sequest HT
[K].ALAEAAR.[E]			0.0372848	0	1	1	1	BA_0126	BA_0126 [108-114]	0	701.394	High	0	0.02851
[K].VGESVAKR.[A]			0.0641044	0.00305894	1	1	1	BA_0126	BA_0126 [77-84]	1	845.484	High	0.002546	0.05129
BA_0047	spoVG regulatory protein SpoVG 50523:50816 forward MW:10934	0	2.24589	18.5567	2	2	2	1	97	10.928	5.26	0.778	3.95897	2
Annotated Sequence	Modifications	Modifications in Master Proteins	Qvality PEP	Qvality q-value	# Protein Groups	# Proteins	# PSMs	Master Protein Accessions	Positions in Master Proteins	# Missed Cleavages	Theo. MH+ [Da]	Confidence Sequest HT	Percolator q-Value Sequest HT	Percolator PEP Sequest HT
[-].MEVTDVR.[L]			0.111279	0.00305894	1	1	1	BA_0047	BA_0047 [1-7]	0	849.413	High	0.002546	0.09357
[R].DIAHPINSGTR.[S]			0.074743	0.00305894	1	1	1	BA_0047	BA_0047 [59-69]	0	1180.61	High	0.002546	0.06067
BA_4008	rpoZ DNA-directed RNA polymerase subunit omega 3687797:3688009 reverse MW:7752	0	2.20642	12.8571	1	1	1	1	70	7.747	5.38	0.778	1.93743	1
Annotated Sequence	Modifications	Modifications in Master Proteins	Qvality PEP	Qvality q-value	# Protein Groups	# Proteins	# PSMs	Master Protein Accessions	Positions in Master Proteins	# Missed Cleavages	Theo. MH+ [Da]	Confidence Sequest HT	Percolator q-Value Sequest HT	Percolator PEP Sequest HT
[K].YTLVTVAAK.[R]			0.00908296	0	1	1	1	BA_4008	BA_4008 [17-25]	0	965.567	High	0	0.006217
BA_5229	BA_5229 hypothetical protein 4742180:4742545 reverse MW:14168	0	1.66403	13.2231	2	2	2	1	121	14.159	6.57	0.778	0	2
Annotated Sequence	Modifications	Modifications in Master Proteins	Qvality PEP	Qvality q-value	# Protein Groups	# Proteins	# PSMs	Master Protein Accessions	Positions in Master Proteins	# Missed Cleavages	Theo. MH+ [Da]	Confidence Sequest HT	Percolator q-Value Sequest HT	Percolator PEP Sequest HT
[K].RPIVTDGTK.[V]			0.117226	0.00305894	1	1	1	BA_5229	BA_5229 [95-103]	0	986.563	High	0.002546	0.09911
[K].SELPLKK.[F]			0.240646	0.0084257	1	1	1	BA_5229	BA_5229 [50-56]	1	814.503	High	0.007067	0.2187
BA_4070	BA_4070 prophage LambdaBa02, repressor protein 3749120:3749326 forward MW:7974	0	1.53641	13.2353	1	1	1	1	68	7.969	8.73	0.778	1.77309	1
Annotated Sequence	Modifications	Modifications in Master Proteins	Qvality PEP	Qvality q-value	# Protein Groups	# Proteins	# PSMs	Master Protein Accessions	Positions in Master Proteins	# Missed Cleavages	Theo. MH+ [Da]	Confidence Sequest HT	Percolator q-Value Sequest HT	Percolator PEP Sequest HT
[R].IIFAEKEIR.[Q]			0.0379691	0	1	1	1	BA_4070	BA_4070 [9-17]	1	1118.66	High	0	0.02908
BA_1629	cspB-1 cold shock protein CspB 1544329:1544526 reverse MW:7196	0	1.45855	15.3846	1	1	1	1	65	7.191	4.65	0.778	2.11833	1
Annotated Sequence	Modifications	Modifications in Master Proteins	Qvality PEP	Qvality q-value	# Protein Groups	# Proteins	# PSMs	Master Protein Accessions	Positions in Master Proteins	# Missed Cleavages	Theo. MH+ [Da]	Confidence Sequest HT	Percolator q-Value Sequest HT	Percolator PEP Sequest HT
[R].GPQAANVVKL.[-]			0.0448692	0	1	2	1	BA_1629	BA_1629 [56-65]	1	996.584	High	0	0.03479
BA_1329	BA_1329 phaR protein 1272736:1273218 forward MW:18523	0	5.54633	22.5	3	3	3	1	160	18.512	4.98	0.701	2.78142	3
Annotated Sequence	Modifications	Modifications in Master Proteins	Qvality PEP	Qvality q-value	# Protein Groups	# Proteins	# PSMs	Master Protein Accessions	Positions in Master Proteins	# Missed Cleavages	Theo. MH+ [Da]	Confidence Sequest HT	Percolator q-Value Sequest HT	Percolator PEP Sequest HT
[K].VESVGQAPTLK.[R]			0.00261095	0	1	1	1	BA_1329	BA_1329 [98-108]	0	1128.63	High	0	0.001631
[K].QNTVLAK.[L]			0.0402424	0	1	1	1	BA_1329	BA_1329 [135-141]	0	773.452	High	0	0.03097
[K].LQEPVKEEVKPTNKPENK.[K]			0.0698487	0.00305894	1	1	1	BA_1329	BA_1329 [142-159]	1	2107.14	High	0.002546	0.05627
BA_0138	rplQ 50S ribosomal protein L17 135291:135653 forward MW:13449	0	4.66105	18.3333	2	2	2	1	120	13.441	10.48	0.668	2.16897	2
Annotated Sequence	Modifications	Modifications in Master Proteins	Qvality PEP	Qvality q-value	# Protein Groups	# Proteins	# PSMs	Master Protein Accessions	Positions in Master Proteins	# Missed Cleavages	Theo. MH+ [Da]	Confidence Sequest HT	Percolator q-Value Sequest HT	Percolator PEP Sequest HT
[R].NEVANAETGQDALQK.[L]			0.00241624	0	1	1	1	BA_0138	BA_0138 [68-82]	0	1587.76	High	0	0.001501
[R].IQTTETR.[A]			0.0199555	0	1	1	1	BA_0138	BA_0138 [30-36]	0	848.447	High	0	0.01454
BA_0105	rpsL 30S ribosomal protein S12 116050:116472 forward MW:15446	0	3.48679	14.2857	2	2	2	1	140	15.437	11.14	0.668	4.70968	2
Annotated Sequence	Modifications	Modifications in Master Proteins	Qvality PEP	Qvality q-value	# Protein Groups	# Proteins	# PSMs	Master Protein Accessions	Positions in Master Proteins	# Missed Cleavages	Theo. MH+ [Da]	Confidence Sequest HT	Percolator q-Value Sequest HT	Percolator PEP Sequest HT
[R].GALDTAGVDKR.[M]			0.00393265	0	1	1	1	BA_0105	BA_0105 [113-123]	1	1102.59	High	0	0.002531
[K].STDISAPQK.[R]			0.14899	0.00305894	1	1	1	BA_0105	BA_0105 [35-43]	0	946.484	High	0.002546	0.1288
BA_4411	spoIIIAG stage III sporulation protein AG 4024927:4025589 reverse MW:24832	0	4.50138	11.3636	3	3	3	1	220	24.817	8.82	0.54	3.73857	3
Annotated Sequence	Modifications	Modifications in Master Proteins	Qvality PEP	Qvality q-value	# Protein Groups	# Proteins	# PSMs	Master Protein Accessions	Positions in Master Proteins	# Missed Cleavages	Theo. MH+ [Da]	Confidence Sequest HT	Percolator q-Value Sequest HT	Percolator PEP Sequest HT
[K].GVDNIQVK.[A]			0.0142326	0	1	1	1	BA_4411	BA_4411 [189-196]	0	872.484	High	0	0.01011
[K].AALEEIAGVK.[D]			0.0275455	0	1	1	1	BA_4411	BA_4411 [102-111]	0	1000.57	High	0	0.02054
[K].AYEQELK.[A]			0.173238	0.00305894	1	1	1	BA_4411	BA_4411 [95-101]	0	880.441	High	0.002546	0.1518
BA_1331	phaC poly(R)-hydroxyalkanoic acid synthase subunit PhaC 1274194:1275279 forward MW:41681	0	6.06195	8.03324	4	4	4	1	361	41.654	7.47	0.52	6.31479	4
Annotated Sequence	Modifications	Modifications in Master Proteins	Qvality PEP	Qvality q-value	# Protein Groups	# Proteins	# PSMs	Master Protein Accessions	Positions in Master Proteins	# Missed Cleavages	Theo. MH+ [Da]	Confidence Sequest HT	Percolator q-Value Sequest HT	Percolator PEP Sequest HT
[K].ANVLNISGK.[R]			0.00476433	0	1	1	1	BA_1331	BA_1331 [296-304]	0	915.526	High	0	0.003112
[K].VDLANIK.[A]			0.092436	0.00305894	1	1	1	BA_1331	BA_1331 [289-295]	0	772.456	High	0.002546	0.07635
[R].FVESWR.[L]			0.0691045	0.00305894	1	1	1	BA_1331	BA_1331 [242-247]	0	823.41	High	0.002546	0.05562
[R].ASEILLR.[E]			0.0805335	0.00305894	1	1	1	BA_1331	BA_1331 [29-35]	0	801.483	High	0.002546	0.06561
BA_4061	BA_4061 DNA-binding protein 3744171:3744677 reverse MW:19823	0	3.8043	9.52381	2	2	2	1	168	19.811	6.81	0.52	5.10928	2
Annotated Sequence	Modifications	Modifications in Master Proteins	Qvality PEP	Qvality q-value	# Protein Groups	# Proteins	# PSMs	Master Protein Accessions	Positions in Master Proteins	# Missed Cleavages	Theo. MH+ [Da]	Confidence Sequest HT	Percolator q-Value Sequest HT	Percolator PEP Sequest HT
[R].KVEHYEVK.[E]			0.00372091	0	1	1	1	BA_4061	BA_4061 [73-80]	1	1031.55	High	0	0.002386
[R].TPAACGFR.[W]	1xCarbamidomethyl [C5]		0.0805335	0.00305894	1	1	1	BA_4061	BA_4061 [45-52]	0	879.414	High	0.002546	0.06577
BA_3805	BA_3805 prophage LambdaBa01, acyltransferase 3489827:3492457 reverse MW:101260	0	17.0269	8.21918	10	11	10	1	876	101.196	6.16	0.498	14.8556	10
Annotated Sequence	Modifications	Modifications in Master Proteins	Qvality PEP	Qvality q-value	# Protein Groups	# Proteins	# PSMs	Master Protein Accessions	Positions in Master Proteins	# Missed Cleavages	Theo. MH+ [Da]	Confidence Sequest HT	Percolator q-Value Sequest HT	Percolator PEP Sequest HT
[K].IDEIDQHVFK.[F]			0.00190088	0	1	1	1	BA_3805	BA_3805 [775-784]	0	1243.63	High	0	0.001156
[K].QTDDFLVYKK.[F]			0.00289517	0	1	1	1	BA_3805	BA_3805 [338-347]	1	1256.65	High	0	0.001819
[K].KVNVDELK.[L]			0.017104	0	1	1	1	BA_3805	BA_3805 [501-508]	1	944.541	High	0	0.0123
[K].QTDDFLVYK.[K]			0.0081925	0	1	1	1	BA_3805	BA_3805 [338-346]	0	1128.56	High	0	0.00558
[K].GTYCSFK.[R]	1xCarbamidomethyl [C4]		0.0825568	0.00305894	1	1	1	BA_3805	BA_3805 [271-277]	0	862.376	High	0.002546	0.0674
[K].ISIQSNK.[Q]			0.0607478	0.00305894	1	1	1	BA_3805	BA_3805 [514-520]	0	789.446	High	0.002546	0.04835
[K].CIVHGEDPK.[Q]	1xCarbamidomethyl [C1]		0.059667	0.00305894	1	1	1	BA_3805	BA_3805 [329-337]	0	1054.5	High	0.002546	0.04753
[K].LKLNEGK.[N]			0.074743	0.00305894	1	1	1	BA_3805	BA_3805 [574-580]	1	801.483	High	0.002546	0.06068
[R].VQPITIR.[-]			0.114415	0.00305894	1	1	1	BA_3805	BA_3805 [870-876]	0	826.515	High	0.002546	0.09624
[R].EFNLHEK.[L]			0.0876735	0.00305894	1	1	2	BA_3805	BA_3805 [44-50]	0	916.452	High	0.002546	0.072
BA_2546	BA_2546 hypothetical protein 2369189:2370157 forward MW:37583	0	5.73246	9.31677	4	5	4	1	322	37.559	9	0.492	3.79243	4
Annotated Sequence	Modifications	Modifications in Master Proteins	Qvality PEP	Qvality q-value	# Protein Groups	# Proteins	# PSMs	Master Protein Accessions	Positions in Master Proteins	# Missed Cleavages	Theo. MH+ [Da]	Confidence Sequest HT	Percolator q-Value Sequest HT	Percolator PEP Sequest HT
[K].LVQPSTR.[E]			0.0156602	0	1	1	2	BA_2546	BA_2546 [70-76]	0	800.462	High	0	0.03542
[K].DLVSFQSDNK.[Y]			0.0165477	0	1	1	1	BA_2546	BA_2546 [182-191]	0	1152.55	High	0	0.01189
[K].IYSGFEK.[A]			0.0954095	0.00305894	1	1	1	BA_2546	BA_2546 [116-122]	0	843.425	High	0.002546	0.07916
[R].EHFFTR.[L]			0.197545	0.00578174	1	1	1	BA_2546	BA_2546 [159-164]	0	836.405	High	0.004827	0.1758
BA_4303	BA_4303 MarR family transcriptional regulator 3930605:3931057 reverse MW:17733	0	2.40616	6	1	1	1	1	150	17.722	9.38	0.468	1.70633	1
Annotated Sequence	Modifications	Modifications in Master Proteins	Qvality PEP	Qvality q-value	# Protein Groups	# Proteins	# PSMs	Master Protein Accessions	Positions in Master Proteins	# Missed Cleavages	Theo. MH+ [Da]	Confidence Sequest HT	Percolator q-Value Sequest HT	Percolator PEP Sequest HT
[R].LLQNDINTR.[F]			0.00592261	0	1	1	1	BA_4303	BA_4303 [33-41]	0	1086.59	High	0	0.003925
BA_5592	uvsE UV damage endonuclease 5077047:5078024 forward MW:37735	0	4.84245	6.76923	3	4	3	1	325	37.71	8.1	0.413	6.03308	3
Annotated Sequence	Modifications	Modifications in Master Proteins	Qvality PEP	Qvality q-value	# Protein Groups	# Proteins	# PSMs	Master Protein Accessions	Positions in Master Proteins	# Missed Cleavages	Theo. MH+ [Da]	Confidence Sequest HT	Percolator q-Value Sequest HT	Percolator PEP Sequest HT
[R].EDKLYDVTK.[Q]			0.00387503	0	1	1	1	BA_5592	BA_5592 [45-53]	1	1110.57	High	0	0.002492
[K].VHISSPK.[S]			0.0448692	0	1	1	2	BA_5592	BA_5592 [252-258]	0	767.441	High	0	0.04152
[R].FHENIK.[K]			0.186888	0.00578174	1	1	1	BA_5592	BA_5592 [176-181]	0	787.41	High	0.004827	0.1655
BA_4674	rpmA 50S ribosomal protein L27 4250996:4251286 reverse MW:10491	0	1.59193	14.5833	1	1	1	1	96	10.485	10.42	0.389	2.26985	1
Annotated Sequence	Modifications	Modifications in Master Proteins	Qvality PEP	Qvality q-value	# Protein Groups	# Proteins	# PSMs	Master Protein Accessions	Positions in Master Proteins	# Missed Cleavages	Theo. MH+ [Da]	Confidence Sequest HT	Percolator q-Value Sequest HT	Percolator PEP Sequest HT
[R].ADGQTVSGGSILYR.[Q]			0.0336706	0	1	1	1	BA_4674	BA_4674 [34-47]	0	1423.72	High	0	0.02559
BA_4182	pdhC branched-chain alpha-keto acid dehydrogenase subunit E2 3828814:3830073 reverse MW:44869	0	7.04079	8.83055	4	4	4	1	419	44.842	5.76	0.374	8.2336	4
Annotated Sequence	Modifications	Modifications in Master Proteins	Qvality PEP	Qvality q-value	# Protein Groups	# Proteins	# PSMs	Master Protein Accessions	Positions in Master Proteins	# Missed Cleavages	Theo. MH+ [Da]	Confidence Sequest HT	Percolator q-Value Sequest HT	Percolator PEP Sequest HT
[R].LAPAEMK.[G]			0.0157758	0	1	1	1	BA_4182	BA_4182 [325-331]	0	759.407	High	0	0.01129
[K].AQPIPAGEYPETR.[E]			0.0161869	0	1	1	1	BA_4182	BA_4182 [179-191]	0	1428.71	High	0	0.01158
[R].LIDGATAQK.[A]			0.00795446	0	1	1	1	BA_4182	BA_4182 [392-400]	0	916.51	High	0	0.005402
[R].IAEKPVVK.[N]			0.14899	0.00305894	1	1	1	BA_4182	BA_4182 [365-372]	0	883.561	High	0.002546	0.1289
BA_3672	BA_3672 DNA polymerase III subunit epsilon 3376139:3377086 reverse MW:36227	0	3.48585	7.93651	3	3	3	1	315	36.204	6.65	0.369	2.04531	3
Annotated Sequence	Modifications	Modifications in Master Proteins	Qvality PEP	Qvality q-value	# Protein Groups	# Proteins	# PSMs	Master Protein Accessions	Positions in Master Proteins	# Missed Cleavages	Theo. MH+ [Da]	Confidence Sequest HT	Percolator q-Value Sequest HT	Percolator PEP Sequest HT
[K].CASIEEEAKR.[K]	1xCarbamidomethyl [C1]		0.0164266	0	1	1	1	BA_3672	BA_3672 [168-177]	1	1192.56	High	0	0.01177
[K].QSEMNADEK.[L]			0.164252	0.00305894	1	1	1	BA_3672	BA_3672 [298-306]	0	1051.44	High	0.002546	0.1433
[K].LETLKR.[M]			0.215489	0.00578174	1	1	1	BA_3672	BA_3672 [138-143]	1	759.472	High	0.004827	0.1937
BA_4043	sigE sporulation sigma factor SigE 3721533:3722252 reverse MW:27636	0	4.03384	7.94979	2	2	2	1	239	27.619	8.03	0.334	4.18066	2
Annotated Sequence	Modifications	Modifications in Master Proteins	Qvality PEP	Qvality q-value	# Protein Groups	# Proteins	# PSMs	Master Protein Accessions	Positions in Master Proteins	# Missed Cleavages	Theo. MH+ [Da]	Confidence Sequest HT	Percolator q-Value Sequest HT	Percolator PEP Sequest HT
[R].FGLAGGEEK.[T]			0.0022196	0	1	1	1	BA_4043	BA_4043 [196-204]	0	907.452	High	0	0.001369
[K].AVNTFNPEKK.[I]			0.0825568	0.00305894	1	1	1	BA_4043	BA_4043 [98-107]	1	1147.61	High	0.002546	0.06757
BA_4483	BA_4483 ArsR family transcriptional regulator 4077603:4078121 forward MW:19973	0.015873	0.930702	4.06977	1	1	1	1	172	19.96	9.16	0.334	2.30567	1
Annotated Sequence	Modifications	Modifications in Master Proteins	Qvality PEP	Qvality q-value	# Protein Groups	# Proteins	# PSMs	Master Protein Accessions	Positions in Master Proteins	# Missed Cleavages	Theo. MH+ [Da]	Confidence Sequest HT	Percolator q-Value Sequest HT	Percolator PEP Sequest HT
[K].VLAHPVR.[L]			0.136852	0.00305894	1	2	1	BA_4483	BA_4483 [97-103]	0	791.489	High	0.002546	0.1173
BA_4566	sigK sporulation sigma factor SigK 4149835:4150548 reverse MW:27118	0	4.03877	8.01688	2	2	2	1	237	27.101	6.44	0.311	2.69794	2
Annotated Sequence	Modifications	Modifications in Master Proteins	Qvality PEP	Qvality q-value	# Protein Groups	# Proteins	# PSMs	Master Protein Accessions	Positions in Master Proteins	# Missed Cleavages	Theo. MH+ [Da]	Confidence Sequest HT	Percolator q-Value Sequest HT	Percolator PEP Sequest HT
[K].DVSLHDPIGQDK.[E]			0.000730748	0	1	1	1	BA_4566	BA_4566 [126-137]	0	1323.65	High	0	0.0004146
[R].EKEVIVK.[R]			0.242149	0.0084257	1	1	1	BA_4566	BA_4566 [179-185]	1	844.514	High	0.007067	0.2206
BA_4831	polA DNA polymerase I 4392304:4394937 reverse MW:99400	0	10.7895	6.04333	6	6	6	1	877	99.337	5.01	0.269	4.50592	6
Annotated Sequence	Modifications	Modifications in Master Proteins	Qvality PEP	Qvality q-value	# Protein Groups	# Proteins	# PSMs	Master Protein Accessions	Positions in Master Proteins	# Missed Cleavages	Theo. MH+ [Da]	Confidence Sequest HT	Percolator q-Value Sequest HT	Percolator PEP Sequest HT
[R].FNQVLTQTGR.[L]			0.000240558	0	1	1	1	BA_4831	BA_4831 [607-616]	0	1163.62	High	0	0.0001255
[R].VLADMEVK.[G]			0.0257905	0	1	1	1	BA_4831	BA_4831 [485-492]	0	904.481	High	0	0.01914
[K].AAAEFIEK.[Y]			0.00967003	0	1	1	1	BA_4831	BA_4831 [732-739]	0	878.462	High	0	0.006656
[K].EWLADGEMR.[K]			0.14208	0.00305894	1	1	1	BA_4831	BA_4831 [360-368]	0	1106.49	High	0.002546	0.1224
[R].YIPEITSR.[N]			0.0782789	0.00305894	1	1	1	BA_4831	BA_4831 [773-780]	0	978.525	High	0.002546	0.06362
[R].LKEMEQEIYK.[L]			0.150509	0.00305894	1	1	1	BA_4831	BA_4831 [512-521]	1	1310.67	High	0.002546	0.1304
BA_4817	rplT 50S ribosomal protein L20 4380019:4380375 reverse MW:13612	0	2.07915	6.77966	1	1	1	1	118	13.603	11.25	0.259	1.67147	1
Annotated Sequence	Modifications	Modifications in Master Proteins	Qvality PEP	Qvality q-value	# Protein Groups	# Proteins	# PSMs	Master Protein Accessions	Positions in Master Proteins	# Missed Cleavages	Theo. MH+ [Da]	Confidence Sequest HT	Percolator q-Value Sequest HT	Percolator PEP Sequest HT
[K].VANQQVMK.[S]			0.0119285	0	1	1	1	BA_4817	BA_4817 [34-41]	0	917.487	High	0	0.008334
BA_3565	BA_3565 ArsR family transcriptional regulator 3270674:3271009 forward MW:12916	0.015873	1.19579	7.20721	1	1	1	1	111	12.908	9.31	0.259	0	1
Annotated Sequence	Modifications	Modifications in Master Proteins	Qvality PEP	Qvality q-value	# Protein Groups	# Proteins	# PSMs	Master Protein Accessions	Positions in Master Proteins	# Missed Cleavages	Theo. MH+ [Da]	Confidence Sequest HT	Percolator q-Value Sequest HT	Percolator PEP Sequest HT
[R].EAGIILMR.[K]			0.0782789	0.00305894	1	1	1	BA_3565	BA_3565 [70-77]	0	902.513	High	0.002546	0.06371
BA_0257	BA_0257 hypothetical protein 244436:244894 forward MW:18391	0.015873	0.828859	5.26316	1	1	1	1	152	18.379	9.42	0.259	0	1
Annotated Sequence	Modifications	Modifications in Master Proteins	Qvality PEP	Qvality q-value	# Protein Groups	# Proteins	# PSMs	Master Protein Accessions	Positions in Master Proteins	# Missed Cleavages	Theo. MH+ [Da]	Confidence Sequest HT	Percolator q-Value Sequest HT	Percolator PEP Sequest HT
[-].MDEQEIQR.[L]			0.169256	0.00305894	1	1	1	BA_0257	BA_0257 [1-8]	0	1048.47	High	0.002546	0.1483
GBAA_pXO2_0054	GBAA_pXO2_0054 hypothetical protein 43138:43602 forward MW:16532	0.0447761	0.69037	9.09091	1	1	1	1	154	16.522	5.34	0.259	0	1
Annotated Sequence	Modifications	Modifications in Master Proteins	Qvality PEP	Qvality q-value	# Protein Groups	# Proteins	# PSMs	Master Protein Accessions	Positions in Master Proteins	# Missed Cleavages	Theo. MH+ [Da]	Confidence Sequest HT	Percolator q-Value Sequest HT	Percolator PEP Sequest HT
[-].MILVSSCLAGKPVR.[Y]	1xOxidation [M1]; 1xCarbamidomethyl [C7]		0.226006	0.00578174	1	1	1	GBAA_pXO2_0054	GBAA_pXO2_0054 [1-14]	0	1546.84	High	0.004827	0.204
BA_2818	recQ-2 ATP-dependent DNA helicase RecQ 2612435:2614552 reverse MW:80352	0	8.85194	5.39007	4	4	4	1	705	80.3	5.44	0.233	4.20194	4
Annotated Sequence	Modifications	Modifications in Master Proteins	Qvality PEP	Qvality q-value	# Protein Groups	# Proteins	# PSMs	Master Protein Accessions	Positions in Master Proteins	# Missed Cleavages	Theo. MH+ [Da]	Confidence Sequest HT	Percolator q-Value Sequest HT	Percolator PEP Sequest HT
[R].ESIDVTR.[E]			0.0163063	0	1	1	1	BA_2818	BA_2818 [401-407]	0	819.421	High	0	0.01169
[K].NMESYYQEAGR.[A]			0.00281095	0	1	1	1	BA_2818	BA_2818 [309-319]	0	1347.56	High	0	0.001764
[R].QTIENHLIR.[C]			0.00103004	0	1	1	1	BA_2818	BA_2818 [640-648]	0	1123.62	High	0	0.0006003
[K].QMIAQVLTGSK.[N]			0.132704	0.00305894	1	1	1	BA_2818	BA_2818 [426-436]	0	1175.65	High	0.002546	0.1136
BA_1552	BA_1552 uracil-DNA glycosylase 1463272:1463913 forward MW:24704	0.015873	1.00864	3.28638	1	1	1	1	213	24.689	9.36	0.212	0	1
Annotated Sequence	Modifications	Modifications in Master Proteins	Qvality PEP	Qvality q-value	# Protein Groups	# Proteins	# PSMs	Master Protein Accessions	Positions in Master Proteins	# Missed Cleavages	Theo. MH+ [Da]	Confidence Sequest HT	Percolator q-Value Sequest HT	Percolator PEP Sequest HT
[R].SGSIIQK.[K]			0.116013	0.00305894	1	1	1	BA_1552	BA_1552 [94-100]	0	732.425	High	0.002546	0.09803
BA_0110	rplC 50S ribosomal protein L3 121305:121937 forward MW:22692	0.057971	0.656788	4.7619	1	1	1	1	210	22.678	10.02	0.194	0	1
Annotated Sequence	Modifications	Modifications in Master Proteins	Qvality PEP	Qvality q-value	# Protein Groups	# Proteins	# PSMs	Master Protein Accessions	Positions in Master Proteins	# Missed Cleavages	Theo. MH+ [Da]	Confidence Sequest HT	Percolator q-Value Sequest HT	Percolator PEP Sequest HT
[K].SLVVVQGAVK.[V]			0.242149	0.0084257	1	1	1	BA_0110	BA_0110 [198-207]	0	999.62	High	0.007067	0.2204
BA_0113	rplB 50S ribosomal protein L2 122905:123735 forward MW:30253	0	1.73755	3.98551	1	1	1	1	276	30.234	10.73	0.145	1.82919	1
Annotated Sequence	Modifications	Modifications in Master Proteins	Qvality PEP	Qvality q-value	# Protein Groups	# Proteins	# PSMs	Master Protein Accessions	Positions in Master Proteins	# Missed Cleavages	Theo. MH+ [Da]	Confidence Sequest HT	Percolator q-Value Sequest HT	Percolator PEP Sequest HT
[R].SAGTSAQVLGK.[E]			0.0246823	0	1	1	1	BA_0113	BA_0113 [157-167]	0	1018.55	High	0	0.0183
BA_4508	nfo endonuclease IV 4101017:4101913 reverse MW:32909	0	4.18277	4.02685	1	2	1	1	298	32.888	6.68	0.136	6.37944	1
Annotated Sequence	Modifications	Modifications in Master Proteins	Qvality PEP	Qvality q-value	# Protein Groups	# Proteins	# PSMs	Master Protein Accessions	Positions in Master Proteins	# Missed Cleavages	Theo. MH+ [Da]	Confidence Sequest HT	Percolator q-Value Sequest HT	Percolator PEP Sequest HT
[K].ILETPYVGEDKK.[D]			0.000131796	0	1	1	2	BA_4508	BA_4508 [258-269]	1	1391.74	High	0	0.0002036
BA_4326	BA_4326 LacI family transcriptional regulator 3950643:3951506 reverse MW:32366	0	2.98255	3.13589	1	1	1	1	287	32.346	5.74	0.129	2.57602	1
Annotated Sequence	Modifications	Modifications in Master Proteins	Qvality PEP	Qvality q-value	# Protein Groups	# Proteins	# PSMs	Master Protein Accessions	Positions in Master Proteins	# Missed Cleavages	Theo. MH+ [Da]	Confidence Sequest HT	Percolator q-Value Sequest HT	Percolator PEP Sequest HT
[K].GYVHEDTVK.[Q]			0.00172058	0	1	1	1	BA_4326	BA_4326 [26-34]	0	1047.51	High	0	0.001041
BA_4157	pyc pyruvate carboxylase 3808980:3812426 reverse MW:128575	0	6.08863	2.78746	4	5	4	1	1148	128.493	5.96	0.127	2.67744	4
Annotated Sequence	Modifications	Modifications in Master Proteins	Qvality PEP	Qvality q-value	# Protein Groups	# Proteins	# PSMs	Master Protein Accessions	Positions in Master Proteins	# Missed Cleavages	Theo. MH+ [Da]	Confidence Sequest HT	Percolator q-Value Sequest HT	Percolator PEP Sequest HT
[K].QILDER.[G]			0.0281564	0	1	1	1	BA_4157	BA_4157 [515-520]	0	773.415	High	0	0.02104
[K].DLHQIAEPTAR.[M]			0.00445823	0	1	1	1	BA_4157	BA_4157 [558-568]	0	1250.65	High	0	0.002891
[R].VLLTDTTFR.[D]			0.145498	0.00305894	1	1	1	BA_4157	BA_4157 [535-543]	0	1065.59	High	0.002546	0.1254
[K].WVQDQK.[R]			0.125609	0.00305894	1	1	2	BA_4157	BA_4157 [528-533]	0	803.405	High	0.002546	0.1069
BA_5147	glyS glycyl-tRNA synthetase 4672795:4674171 forward MW:53018	0.0447761	0.774174	4.14847	1	1	1	1	458	52.984	5.2	0.093	0	1
Annotated Sequence	Modifications	Modifications in Master Proteins	Qvality PEP	Qvality q-value	# Protein Groups	# Proteins	# PSMs	Master Protein Accessions	Positions in Master Proteins	# Missed Cleavages	Theo. MH+ [Da]	Confidence Sequest HT	Percolator q-Value Sequest HT	Percolator PEP Sequest HT
[R].HMEHSNEDFNYIDPQTNER.[Y]	1xOxidation [M2]; 2xDeamidated [N10; N17]		0.189972	0.00578174	1	1	1	BA_5147	BA_5147 [302-320]	0	2393.96	High	0.004827	0.1682
BA_2107	fhs formate--tetrahydrofolate ligase 1965220:1966908 forward MW:60489	0	2.63004	1.9573	1	1	1	1	562	60.451	5.63	0.08	1.8643	1
Annotated Sequence	Modifications	Modifications in Master Proteins	Qvality PEP	Qvality q-value	# Protein Groups	# Proteins	# PSMs	Master Protein Accessions	Positions in Master Proteins	# Missed Cleavages	Theo. MH+ [Da]	Confidence Sequest HT	Percolator q-Value Sequest HT	Percolator PEP Sequest HT
[K].GGQGGVDLAEK.[V]			0.00366639	0	1	1	1	BA_2107	BA_2107 [418-428]	0	1030.52	High	0	0.002344
BA_5441	celF 6-phospho-beta-glucosidase 4930148:4931473 reverse MW:49286	0.015873	0.945004	4.30839	1	1	1	1	441	49.255	5.52	0.077	0	1
Annotated Sequence	Modifications	Modifications in Master Proteins	Qvality PEP	Qvality q-value	# Protein Groups	# Proteins	# PSMs	Master Protein Accessions	Positions in Master Proteins	# Missed Cleavages	Theo. MH+ [Da]	Confidence Sequest HT	Percolator q-Value Sequest HT	Percolator PEP Sequest HT
[K].QILDEMLEAHKEYLPQFFK.[K]	1xOxidation [M6]		0.132704	0.00305894	1	1	1	BA_5441	BA_5441 [419-437]	1	2395.2	High	0.002546	0.1135
GBAA_pXO2_0100	GBAA_pXO2_0100 hypothetical protein 81837:83462 forward MW:63379	0.057971	0.670399	1.66359	1	1	1	1	541	63.339	6.11	0.064	0	1
Annotated Sequence	Modifications	Modifications in Master Proteins	Qvality PEP	Qvality q-value	# Protein Groups	# Proteins	# PSMs	Master Protein Accessions	Positions in Master Proteins	# Missed Cleavages	Theo. MH+ [Da]	Confidence Sequest HT	Percolator q-Value Sequest HT	Percolator PEP Sequest HT
[K].NTPERTGIR.[R]			0.235442	0.0084257	1	1	1	GBAA_pXO2_0100	GBAA_pXO2_0100 [510-518]	1	1043.56	High	0.007067	0.2136
BA_3955	polC DNA polymerase III PolC 3629390:3633691 reverse MW:161660	0	3.45108	1.32589	2	2	2	1	1433	161.556	5.41	0.052	1.8288	2
Annotated Sequence	Modifications	Modifications in Master Proteins	Qvality PEP	Qvality q-value	# Protein Groups	# Proteins	# PSMs	Master Protein Accessions	Positions in Master Proteins	# Missed Cleavages	Theo. MH+ [Da]	Confidence Sequest HT	Percolator q-Value Sequest HT	Percolator PEP Sequest HT
[R].GSVQNDTFVR.[D]			0.00512911	0	1	1	1	BA_3955	BA_3955 [295-304]	0	1122.55	High	0	0.003374
[R].LVAGCTGVK.[R]	1xCarbamidomethyl [C5]		0.123463	0.00305894	1	1	1	BA_3955	BA_3955 [1025-1033]	0	904.492	High	0.002546	0.1049
BA_5421	secA preprotein translocase subunit SecA 4908354:4910861 reverse MW:95077	0.0447761	0.676542	0.958084	1	1	1	1	835	95.015	5.69	0.044	0	1
Annotated Sequence	Modifications	Modifications in Master Proteins	Qvality PEP	Qvality q-value	# Protein Groups	# Proteins	# PSMs	Master Protein Accessions	Positions in Master Proteins	# Missed Cleavages	Theo. MH+ [Da]	Confidence Sequest HT	Percolator q-Value Sequest HT	Percolator PEP Sequest HT
[R].QQREVIYK.[Q]			0.232507	0.00578174	1	1	1	BA_5421	BA_5421 [604-611]	1	1063.59	High	0.004827	0.2106

## Sheet: control
In vitro promoter pull-down proteins list of control group
Master	Accession	Description	Exp. q-value	Sum PEP Score	Coverage	# Peptides	# PSMs	# Unique Peptides	# Protein Groups	# AAs	MW [kDa]	calc. pI	Found in Sample: [S4] F4: Sample	Modifications	emPAI	Score Sequest HT	# Peptides Sequest HT
Master Protein	BA_4409	accB acetyl-CoA carboxylase biotin carboxyl carrier protein subunit 4022988:4023482 reverse MW:18024		5.14724	14.0244	3	4	3	1	164	18.013	4.91	High		2.162	10.0927	3
Confidence	Annotated Sequence	Modifications	Modifications in Master Proteins	Qvality PEP	Qvality q-value	# Protein Groups	# Proteins	# PSMs	Master Protein Accessions	Positions in Master Proteins	# Missed Cleavages	Theo. MH+ [Da]	Found in Sample: [S4] F4: Sample	XCorr Sequest HT	Confidence Sequest HT	Percolator q-Value Sequest HT	Percolator PEP Sequest HT
High	[K].RGNEVVAVQAPVAK.[Q]			0.0910922	0	1	1	2	BA_4409	BA_4409 [36-49]	1	1437.82	High	2.99086	High	0	0.07899
High	[R].GNEVVAVQAPVAK.[Q]			0.0102562	0	1	1	1	BA_4409	BA_4409 [37-49]	0	1281.72	High	2.71707	High	0	0.007986
High	[K].AVQNENLHK.[I]			0.114126	0	1	1	1	BA_4409	BA_4409 [79-87]	0	1052.55	High	1.93002	High	0	0.09986
Master Protein	BA_0134	rpmJ 50S ribosomal protein L36 133216:133329 forward MW:4333		1.33942	24.3243	1	1	1	1	37	4.33	10.46	High		2.162	2.04876	1
Confidence	Annotated Sequence	Modifications	Modifications in Master Proteins	Qvality PEP	Qvality q-value	# Protein Groups	# Proteins	# PSMs	Master Protein Accessions	Positions in Master Proteins	# Missed Cleavages	Theo. MH+ [Da]	Found in Sample: [S4] F4: Sample	XCorr Sequest HT	Confidence Sequest HT	Percolator q-Value Sequest HT	Percolator PEP Sequest HT
High	[K].VMVICENPK.[H]	1xCarbamidomethyl [C5]		0.0541875	0	1	1	1	BA_0134	BA_0134 [23-31]	0	1089.54	High	2.04876	High	0	0.04577
Master Protein	BA_4620	BA_4620 hypothetical protein 4197516:4197644 reverse MW:4816		0.729088	16.6667	1	1	1	1	42	4.814	10.8	High		2.162	1.98575	1
Confidence	Annotated Sequence	Modifications	Modifications in Master Proteins	Qvality PEP	Qvality q-value	# Protein Groups	# Proteins	# PSMs	Master Protein Accessions	Positions in Master Proteins	# Missed Cleavages	Theo. MH+ [Da]	Found in Sample: [S4] F4: Sample	XCorr Sequest HT	Confidence Sequest HT	Percolator q-Value Sequest HT	Percolator PEP Sequest HT
High	[R].KQDVFSK.[R]			0.20691	0	1	1	1	BA_4620	BA_4620 [22-28]	1	851.462	High	1.98575	High	0	0.1866
Master Protein	BA_1531	hup-1 DNA-binding protein HU 1447107:1447379 forward MW:9642		4.21898	24.4444	2	2	2	1	90	9.636	9.31	High		1.512	4.83601	2
Confidence	Annotated Sequence	Modifications	Modifications in Master Proteins	Qvality PEP	Qvality q-value	# Protein Groups	# Proteins	# PSMs	Master Protein Accessions	Positions in Master Proteins	# Missed Cleavages	Theo. MH+ [Da]	Found in Sample: [S4] F4: Sample	XCorr Sequest HT	Confidence Sequest HT	Percolator q-Value Sequest HT	Percolator PEP Sequest HT
High	[R].NPQTGEEIEIAASK.[V]			0.000482858	0	1	1	1	BA_1531	BA_1531 [62-75]	0	1486.74	High	2.84582	High	0	0.000325949
High	[K].VPAFKPGK.[A]			0.205731	0	1	1	1	BA_1531	BA_1531 [76-83]	0	843.509	High	1.99019	High	0	0.1853
Master Protein	BA_4534	rpsU 30S ribosomal protein S21 4122482:4122655 reverse MW:6772		1.32827	14.0351	1	1	1	1	57	6.769	11.09	High		1.154	2.23604	1
Confidence	Annotated Sequence	Modifications	Modifications in Master Proteins	Qvality PEP	Qvality q-value	# Protein Groups	# Proteins	# PSMs	Master Protein Accessions	Positions in Master Proteins	# Missed Cleavages	Theo. MH+ [Da]	Found in Sample: [S4] F4: Sample	XCorr Sequest HT	Confidence Sequest HT	Percolator q-Value Sequest HT	Percolator PEP Sequest HT
High	[K].TGTLAEAR.[K]			0.0555006	0	1	1	1	BA_4534	BA_4534 [26-33]	0	818.437	High	2.23604	High	0	0.04696
Master Protein	BA_3996	rpmB 50S ribosomal protein L28 3674419:3674607 forward MW:6953		0.92336	11.2903	1	1	1	1	62	6.949	12.02	High		0.778	0	1
Confidence	Annotated Sequence	Modifications	Modifications in Master Proteins	Qvality PEP	Qvality q-value	# Protein Groups	# Proteins	# PSMs	Master Protein Accessions	Positions in Master Proteins	# Missed Cleavages	Theo. MH+ [Da]	Found in Sample: [S4] F4: Sample	XCorr Sequest HT	Confidence Sequest HT	Percolator q-Value Sequest HT	Percolator PEP Sequest HT
High	[K].WGANLQK.[V]			0.135016	0	1	1	1	BA_3996	BA_3996 [29-35]	0	816.436	High	1.53296	High	0	0.1193
Master Protein	BA_0138	rplQ 50S ribosomal protein L17 135291:135653 forward MW:13449		2.15247	18.3333	2	2	2	1	120	13.441	10.48	High		0.668	2.26329	2
Confidence	Annotated Sequence	Modifications	Modifications in Master Proteins	Qvality PEP	Qvality q-value	# Protein Groups	# Proteins	# PSMs	Master Protein Accessions	Positions in Master Proteins	# Missed Cleavages	Theo. MH+ [Da]	Found in Sample: [S4] F4: Sample	XCorr Sequest HT	Confidence Sequest HT	Percolator q-Value Sequest HT	Percolator PEP Sequest HT
High	[R].NEVANAETGQDALQK.[L]			0.0704968	0	1	1	1	BA_0138	BA_0138 [68-82]	0	1587.76	High	2.26329	High	0	0.06032
High	[R].IQTTETR.[A]			0.132265	0	1	1	1	BA_0138	BA_0138 [30-36]	0	848.447	High	1.47449	High	0	0.1167
Master Protein	BA_4817	rplT 50S ribosomal protein L20 4380019:4380375 reverse MW:13612		2.16124	14.4068	2	2	2	1	118	13.603	11.25	High		0.585	3.8387	2
Confidence	Annotated Sequence	Modifications	Modifications in Master Proteins	Qvality PEP	Qvality q-value	# Protein Groups	# Proteins	# PSMs	Master Protein Accessions	Positions in Master Proteins	# Missed Cleavages	Theo. MH+ [Da]	Found in Sample: [S4] F4: Sample	XCorr Sequest HT	Confidence Sequest HT	Percolator q-Value Sequest HT	Percolator PEP Sequest HT
High	[K].NAGIEVNRK.[M]			0.20691	0	1	1	1	BA_4817	BA_4817 [85-93]	1	1000.55	High	1.83672	High	0	0.1866
High	[K].VANQQVMK.[S]			0.0442032	0	1	1	1	BA_4817	BA_4817 [34-41]	0	917.487	High	2.00198	High	0	0.03697
Master Protein	BA_5723	rpsF 30S ribosomal protein S6 5214417:5214707 reverse MW:11269		0.729088	7.29167	1	1	1	1	96	11.262	5.29	High		0.585	1.72737	1
Confidence	Annotated Sequence	Modifications	Modifications in Master Proteins	Qvality PEP	Qvality q-value	# Protein Groups	# Proteins	# PSMs	Master Protein Accessions	Positions in Master Proteins	# Missed Cleavages	Theo. MH+ [Da]	Found in Sample: [S4] F4: Sample	XCorr Sequest HT	Confidence Sequest HT	Percolator q-Value Sequest HT	Percolator PEP Sequest HT
High	[K].INEDILR.[H]			0.20691	0	1	1	1	BA_5723	BA_5723 [81-87]	0	872.484	High	1.72737	High	0	0.1866
Master Protein	BA_5722	ssb-1 single-stranded DNA-binding protein 5213869:5214399 reverse MW:19160		2.06855	10.7955	2	2	2	1	176	19.148	5.66	High		0.52	4.16357	2
Confidence	Annotated Sequence	Modifications	Modifications in Master Proteins	Qvality PEP	Qvality q-value	# Protein Groups	# Proteins	# PSMs	Master Protein Accessions	Positions in Master Proteins	# Missed Cleavages	Theo. MH+ [Da]	Found in Sample: [S4] F4: Sample	XCorr Sequest HT	Confidence Sequest HT	Percolator q-Value Sequest HT	Percolator PEP Sequest HT
High	[R].AFANQQGER.[E]			0.15586	0	1	1	1	BA_5722	BA_5722 [39-47]	0	1020.49	High	2.01278	High	0	0.1387
High	[K].KGSLAGVDGR.[L]			0.0719856	0	1	1	1	BA_5722	BA_5722 [70-79]	1	959.527	High	2.15079	High	0	0.06157
Master Protein	BA_0128	rpmD 50S ribosomal protein L30 129483:129665 forward MW:6555		1.48004	13.3333	1	1	1	1	60	6.552	9.88	High		0.468	2.39187	1
Confidence	Annotated Sequence	Modifications	Modifications in Master Proteins	Qvality PEP	Qvality q-value	# Protein Groups	# Proteins	# PSMs	Master Protein Accessions	Positions in Master Proteins	# Missed Cleavages	Theo. MH+ [Da]	Found in Sample: [S4] F4: Sample	XCorr Sequest HT	Confidence Sequest HT	Percolator q-Value Sequest HT	Percolator PEP Sequest HT
High	[K].VSHLVTVK.[E]			0.0398013	0	1	1	1	BA_0128	BA_0128 [51-58]	0	882.541	High	2.39187	High	0	0.03311
Master Protein	BA_4674	rpmA 50S ribosomal protein L27 4250996:4251286 reverse MW:10491		0.972243	9.375	1	1	1	1	96	10.485	10.42	High		0.389	0	1
Confidence	Annotated Sequence	Modifications	Modifications in Master Proteins	Qvality PEP	Qvality q-value	# Protein Groups	# Proteins	# PSMs	Master Protein Accessions	Positions in Master Proteins	# Missed Cleavages	Theo. MH+ [Da]	Found in Sample: [S4] F4: Sample	XCorr Sequest HT	Confidence Sequest HT	Percolator q-Value Sequest HT	Percolator PEP Sequest HT
High	[R].GGDDTLYAK.[V]			0.121431	0	1	1	1	BA_4674	BA_4674 [62-70]	0	939.442	High	1.4894	High	0	0.1066
Master Protein	BA_0135	rpsM 30S ribosomal protein S13 133351:133716 forward MW:13819		0.796423	7.43802	1	1	1	1	121	13.811	11.17	High		0.389	1.94105	1
Confidence	Annotated Sequence	Modifications	Modifications in Master Proteins	Qvality PEP	Qvality q-value	# Protein Groups	# Proteins	# PSMs	Master Protein Accessions	Positions in Master Proteins	# Missed Cleavages	Theo. MH+ [Da]	Found in Sample: [S4] F4: Sample	XCorr Sequest HT	Confidence Sequest HT	Percolator q-Value Sequest HT	Percolator PEP Sequest HT
High	[R].DLTEDELGR.[I]			0.17868	0	1	1	1	BA_0135	BA_0135 [47-55]	0	1047.5	High	1.94105	High	0	0.1598
Master Protein	BA_0267	groEL chaperonin GroEL 258866:260500 forward MW:57432		4.4933	6.98529	4	4	4	1	544	57.396	4.84	High		0.334	7.48981	4
Confidence	Annotated Sequence	Modifications	Modifications in Master Proteins	Qvality PEP	Qvality q-value	# Protein Groups	# Proteins	# PSMs	Master Protein Accessions	Positions in Master Proteins	# Missed Cleavages	Theo. MH+ [Da]	Found in Sample: [S4] F4: Sample	XCorr Sequest HT	Confidence Sequest HT	Percolator q-Value Sequest HT	Percolator PEP Sequest HT
High	[R].IEDALNSTR.[A]			0.160942	0	1	1	1	BA_0267	BA_0267 [394-402]	0	1018.52	High	2.00063	High	0	0.1432
High	[R].GVDTLANAVK.[V]			0.189301	0	1	1	1	BA_0267	BA_0267 [18-27]	0	987.547	High	1.90809	High	0	0.1701
High	[K].VGAATETELK.[E]			0.0482153	0	1	1	1	BA_0267	BA_0267 [379-388]	0	1018.54	High	1.90159	High	0	0.04043
High	[K].TISKPIEGK.[S]			0.0392091	0	1	1	1	BA_0267	BA_0267 [132-140]	0	972.572	High	1.6795	High	0	0.03261
Master Protein	BA_0112	rplW 50S ribosomal protein L23 122586:122876 forward MW:11114		0.736364	8.33333	1	1	1	1	96	11.107	9.99	High		0.334	0	1
Confidence	Annotated Sequence	Modifications	Modifications in Master Proteins	Qvality PEP	Qvality q-value	# Protein Groups	# Proteins	# PSMs	Master Protein Accessions	Positions in Master Proteins	# Missed Cleavages	Theo. MH+ [Da]	Found in Sample: [S4] F4: Sample	XCorr Sequest HT	Confidence Sequest HT	Percolator q-Value Sequest HT	Percolator PEP Sequest HT
High	[R].SMEMMAEK.[K]			0.20339	0	1	1	1	BA_0112	BA_0112 [17-24]	0	956.389	High	1.27462	High	0	0.1835
Master Protein	BA_0105	rpsL 30S ribosomal protein S12 116050:116472 forward MW:15446		0.890421	6.42857	1	1	1	1	140	15.437	11.14	High		0.292	2.23975	1
Confidence	Annotated Sequence	Modifications	Modifications in Master Proteins	Qvality PEP	Qvality q-value	# Protein Groups	# Proteins	# PSMs	Master Protein Accessions	Positions in Master Proteins	# Missed Cleavages	Theo. MH+ [Da]	Found in Sample: [S4] F4: Sample	XCorr Sequest HT	Confidence Sequest HT	Percolator q-Value Sequest HT	Percolator PEP Sequest HT
High	[K].STDISAPQK.[R]			0.145295	0	1	1	1	BA_0105	BA_0105 [35-43]	0	946.484	High	2.23975	High	0	0.1287
Master Protein	BA_0111	rplD 50S ribosomal protein L4 121963:122586 forward MW:22530		0.851706	5.31401	1	1	1	1	207	22.516	9.95	High		0.292	2.1065	1
Confidence	Annotated Sequence	Modifications	Modifications in Master Proteins	Qvality PEP	Qvality q-value	# Protein Groups	# Proteins	# PSMs	Master Protein Accessions	Positions in Master Proteins	# Missed Cleavages	Theo. MH+ [Da]	Found in Sample: [S4] F4: Sample	XCorr Sequest HT	Confidence Sequest HT	Percolator q-Value Sequest HT	Percolator PEP Sequest HT
High	[R].GGGTVFGPTPR.[S]			0.158151	0	1	1	1	BA_0111	BA_0111 [85-95]	0	1045.54	High	2.1065	High	0	0.1407
Master Protein	BA_4387	BA_4387 leucine dehydrogenase 4001313:4002413 reverse MW:39851		1.54454	5.19126	2	2	2	1	366	39.826	5.27	High		0.274	0	2
Confidence	Annotated Sequence	Modifications	Modifications in Master Proteins	Qvality PEP	Qvality q-value	# Protein Groups	# Proteins	# PSMs	Master Protein Accessions	Positions in Master Proteins	# Missed Cleavages	Theo. MH+ [Da]	Found in Sample: [S4] F4: Sample	XCorr Sequest HT	Confidence Sequest HT	Percolator q-Value Sequest HT	Percolator PEP Sequest HT
High	[K].EAFGTDNLEGK.[V]			0.179717	0	1	1	1	BA_4387	BA_4387 [166-176]	0	1180.55	High	1.5231	High	0	0.1607
High	[R].NGHDIISR.[R]			0.197644	0	1	1	1	BA_4387	BA_4387 [358-365]	0	911.469	High	1.38735	High	0	0.1776
Master Protein	BA_4182	pdhC branched-chain alpha-keto acid dehydrogenase subunit E2 3828814:3830073 reverse MW:44869		2.95659	6.92124	3	3	3	1	419	44.842	5.76	High		0.269	3.95302	3
Confidence	Annotated Sequence	Modifications	Modifications in Master Proteins	Qvality PEP	Qvality q-value	# Protein Groups	# Proteins	# PSMs	Master Protein Accessions	Positions in Master Proteins	# Missed Cleavages	Theo. MH+ [Da]	Found in Sample: [S4] F4: Sample	XCorr Sequest HT	Confidence Sequest HT	Percolator q-Value Sequest HT	Percolator PEP Sequest HT
High	[K].AQPIPAGEYPETR.[E]			0.0913635	0	1	1	1	BA_4182	BA_4182 [179-191]	0	1428.71	High	2.21975	High	0	0.0792
High	[R].LIDGATAQK.[A]			0.150489	0	1	1	1	BA_4182	BA_4182 [392-400]	0	916.51	High	1.55894	High	0	0.1334
High	[R].LAPAEMK.[G]			0.119299	0	1	1	1	BA_4182	BA_4182 [325-331]	0	759.407	High	1.73327	High	0	0.1046
Master Protein	BA_0097	rplK 50S ribosomal protein L11 104969:105394 forward MW:14943		0.888401	9.21986	1	1	1	1	141	14.934	9.5	High		0.259	2.09767	1
Confidence	Annotated Sequence	Modifications	Modifications in Master Proteins	Qvality PEP	Qvality q-value	# Protein Groups	# Proteins	# PSMs	Master Protein Accessions	Positions in Master Proteins	# Missed Cleavages	Theo. MH+ [Da]	Found in Sample: [S4] F4: Sample	XCorr Sequest HT	Confidence Sequest HT	Percolator q-Value Sequest HT	Percolator PEP Sequest HT
High	[K].VAGIESGSGEPNR.[N]			0.145721	0	1	1	1	BA_0097	BA_0097 [82-94]	0	1272.62	High	2.09767	High	0	0.1293
Master Protein	BA_2267	BA_2267 alcohol dehydrogenase 2112163:2113200 forward MW:36737		3.56456	5.50725	2	2	2	1	345	36.714	5.2	High		0.233	4.28267	2
Confidence	Annotated Sequence	Modifications	Modifications in Master Proteins	Qvality PEP	Qvality q-value	# Protein Groups	# Proteins	# PSMs	Master Protein Accessions	Positions in Master Proteins	# Missed Cleavages	Theo. MH+ [Da]	Found in Sample: [S4] F4: Sample	XCorr Sequest HT	Confidence Sequest HT	Percolator q-Value Sequest HT	Percolator PEP Sequest HT
High	[K].ANIEVVEK.[E]			0.0454114	0	1	1	1	BA_2267	BA_2267 [12-19]	0	901.499	High	1.9497	High	0	0.03798
High	[K].VAFNSAVDAVR.[A]			0.0092338	0	1	1	1	BA_2267	BA_2267 [243-253]	0	1148.61	High	2.33297	High	0	0.007176
Master Protein	BA_0124	rpsH 30S ribosomal protein S8 127583:127981 forward MW:14882		1.15015	6.81818	1	1	1	1	132	14.873	9.66	High		0.212	2.28849	1
Confidence	Annotated Sequence	Modifications	Modifications in Master Proteins	Qvality PEP	Qvality q-value	# Protein Groups	# Proteins	# PSMs	Master Protein Accessions	Positions in Master Proteins	# Missed Cleavages	Theo. MH+ [Da]	Found in Sample: [S4] F4: Sample	XCorr Sequest HT	Confidence Sequest HT	Percolator q-Value Sequest HT	Percolator PEP Sequest HT
High	[K].GVMTDKDAR.[Q]			0.0820795	0	1	1	1	BA_0124	BA_0124 [111-119]	1	992.483	High	2.28849	High	0	0.07077
Master Protein	BA_0110	rplC 50S ribosomal protein L3 121305:121937 forward MW:22692		3.15646	5.71429	1	1	1	1	210	22.678	10.02	High		0.194	2.70363	1
Confidence	Annotated Sequence	Modifications	Modifications in Master Proteins	Qvality PEP	Qvality q-value	# Protein Groups	# Proteins	# PSMs	Master Protein Accessions	Positions in Master Proteins	# Missed Cleavages	Theo. MH+ [Da]	Found in Sample: [S4] F4: Sample	XCorr Sequest HT	Confidence Sequest HT	Percolator q-Value Sequest HT	Percolator PEP Sequest HT
High	[K].LTNKPEQGHTAK.[A]			0.000999616	0	1	1	1	BA_0110	BA_0110 [60-71]	0	1323.7	High	2.70363	High	0	0.0006975
Master Protein	BA_0122	rplE 50S ribosomal protein L5 126795:127334 forward MW:20177		1.09985	5.02793	1	1	1	1	179	20.165	9.7	High		0.194	1.62214	1
Confidence	Annotated Sequence	Modifications	Modifications in Master Proteins	Qvality PEP	Qvality q-value	# Protein Groups	# Proteins	# PSMs	Master Protein Accessions	Positions in Master Proteins	# Missed Cleavages	Theo. MH+ [Da]	Found in Sample: [S4] F4: Sample	XCorr Sequest HT	Confidence Sequest HT	Percolator q-Value Sequest HT	Percolator PEP Sequest HT
High	[K].EITPALVSK.[F]			0.0916356	0	1	1	1	BA_0122	BA_0122 [11-19]	0	957.562	High	1.62214	High	0	0.07946
Master Protein	BA_0099	rplJ 50S ribosomal protein L10 106497:106997 forward MW:18036		0.880414	4.81928	1	1	1	1	166	18.026	5.44	High		0.194	0	1
Confidence	Annotated Sequence	Modifications	Modifications in Master Proteins	Qvality PEP	Qvality q-value	# Protein Groups	# Proteins	# PSMs	Master Protein Accessions	Positions in Master Proteins	# Missed Cleavages	Theo. MH+ [Da]	Found in Sample: [S4] F4: Sample	XCorr Sequest HT	Confidence Sequest HT	Percolator q-Value Sequest HT	Percolator PEP Sequest HT
High	[K].STIVVDYR.[G]			0.148304	0	1	1	1	BA_0099	BA_0099 [24-31]	0	952.51	High	1.40635	High	0	0.1317
Master Protein	BA_0116	rpsC 30S ribosomal protein S3 124437:125096 forward MW:24294		1.0837	3.65297	1	1	1	1	219	24.279	9.99	High		0.155	0	1
Confidence	Annotated Sequence	Modifications	Modifications in Master Proteins	Qvality PEP	Qvality q-value	# Protein Groups	# Proteins	# PSMs	Master Protein Accessions	Positions in Master Proteins	# Missed Cleavages	Theo. MH+ [Da]	Found in Sample: [S4] F4: Sample	XCorr Sequest HT	Confidence Sequest HT	Percolator q-Value Sequest HT	Percolator PEP Sequest HT
High	[K].LVGENIAR.[Q]			0.0949633	0	1	1	1	BA_0116	BA_0116 [114-121]	0	871.5	High	1.30854	High	0	0.08247
Master Protein	BA_3965	rpsB 30S ribosomal protein S2 3642076:3642777 reverse MW:26517		0.895172	3.86266	1	1	1	1	233	26.5	9.11	High		0.145	1.79741	1
Confidence	Annotated Sequence	Modifications	Modifications in Master Proteins	Qvality PEP	Qvality q-value	# Protein Groups	# Proteins	# PSMs	Master Protein Accessions	Positions in Master Proteins	# Missed Cleavages	Theo. MH+ [Da]	Found in Sample: [S4] F4: Sample	XCorr Sequest HT	Confidence Sequest HT	Percolator q-Value Sequest HT	Percolator PEP Sequest HT
High	[K].MADAILEAK.[Q]			0.143601	0	1	1	1	BA_3965	BA_3965 [217-225]	0	961.502	High	1.79741	High	0	0.1273
Master Protein	BA_5580	fba-2 fructose-bisphosphate aldolase 5063434:5064291 reverse MW:30673		1.27043	2.80702	1	1	1	1	285	30.654	5.15	High		0.136	1.91837	1
Confidence	Annotated Sequence	Modifications	Modifications in Master Proteins	Qvality PEP	Qvality q-value	# Protein Groups	# Proteins	# PSMs	Master Protein Accessions	Positions in Master Proteins	# Missed Cleavages	Theo. MH+ [Da]	Found in Sample: [S4] F4: Sample	XCorr Sequest HT	Confidence Sequest HT	Percolator q-Value Sequest HT	Percolator PEP Sequest HT
High	[K].VVEYAHAR.[N]			0.0631188	0	1	1	1	BA_5580	BA_5580 [123-130]	0	944.495	High	1.91837	High	0	0.05365
Master Protein	BA_4183	pdhB pyruvate dehydrogenase complex E1 component subunit beta 3830166:3831143 reverse MW:35229		1.1736	2.76923	1	1	1	1	325	35.207	4.86	High		0.136	1.74197	1
Confidence	Annotated Sequence	Modifications	Modifications in Master Proteins	Qvality PEP	Qvality q-value	# Protein Groups	# Proteins	# PSMs	Master Protein Accessions	Positions in Master Proteins	# Missed Cleavages	Theo. MH+ [Da]	Found in Sample: [S4] F4: Sample	XCorr Sequest HT	Confidence Sequest HT	Percolator q-Value Sequest HT	Percolator PEP Sequest HT
High	[R].VVVVQEAQK.[Q]			0.0780242	0	1	1	1	BA_4183	BA_4183 [257-265]	0	999.583	High	1.74197	High	0	0.06705
Master Protein	BA_0098	rplA 50S ribosomal protein L1 105572:106264 forward MW:24481		1.39469	5.65217	1	1	1	1	230	24.466	9.52	High		0.129	2.12833	1
Confidence	Annotated Sequence	Modifications	Modifications in Master Proteins	Qvality PEP	Qvality q-value	# Protein Groups	# Proteins	# PSMs	Master Protein Accessions	Positions in Master Proteins	# Missed Cleavages	Theo. MH+ [Da]	Found in Sample: [S4] F4: Sample	XCorr Sequest HT	Confidence Sequest HT	Percolator q-Value Sequest HT	Percolator PEP Sequest HT
High	[K].NVTVASTMGPGVR.[V]			0.0480711	0	1	1	1	BA_0098	BA_0098 [211-223]	0	1288.67	High	2.12833	High	0	0.0403
Master Protein	BA_4157	pyc pyruvate carboxylase 3808980:3812426 reverse MW:128575		3.27344	2.43902	3	3	3	1	1148	128.493	5.96	High		0.094	7.18272	3
Confidence	Annotated Sequence	Modifications	Modifications in Master Proteins	Qvality PEP	Qvality q-value	# Protein Groups	# Proteins	# PSMs	Master Protein Accessions	Positions in Master Proteins	# Missed Cleavages	Theo. MH+ [Da]	Found in Sample: [S4] F4: Sample	XCorr Sequest HT	Confidence Sequest HT	Percolator q-Value Sequest HT	Percolator PEP Sequest HT
High	[R].DAHQSLLATR.[I]			0.0398013	0	1	1	1	BA_4157	BA_4157 [544-553]	0	1111.59	High	2.56648	High	0	0.03311
High	[R].SGGGFGVR.[L]			0.195949	0	1	1	1	BA_4157	BA_4157 [371-378]	0	736.374	High	2.38122	High	0	0.176
High	[R].EIVVKDESVK.[A]			0.104735	0	1	1	1	BA_4157	BA_4157 [1055-1064]	1	1145.64	High	2.23502	High	0	0.09143
Master Protein	BA_5547	atpD F0F1 ATP synthase subunit beta 5037806:5039215 reverse MW:51194		1.43938	1.70576	1	1	1	1	469	51.162	5.05	High		0.083	1.71979	1
Confidence	Annotated Sequence	Modifications	Modifications in Master Proteins	Qvality PEP	Qvality q-value	# Protein Groups	# Proteins	# PSMs	Master Protein Accessions	Positions in Master Proteins	# Missed Cleavages	Theo. MH+ [Da]	Found in Sample: [S4] F4: Sample	XCorr Sequest HT	Confidence Sequest HT	Percolator q-Value Sequest HT	Percolator PEP Sequest HT
High	[R].QVQQTLQR.[Y]			0.0435459	0	1	1	1	BA_5547	BA_5547 [367-374]	0	1000.55	High	1.71979	High	0	0.03636
Master Protein	BA_3971	topA DNA topoisomerase I 3648303:3650381 reverse MW:79064		0.756962	1.44509	1	1	1	1	692	79.014	8.27	High		0.058	1.77491	1
Confidence	Annotated Sequence	Modifications	Modifications in Master Proteins	Qvality PEP	Qvality q-value	# Protein Groups	# Proteins	# PSMs	Master Protein Accessions	Positions in Master Proteins	# Missed Cleavages	Theo. MH+ [Da]	Found in Sample: [S4] F4: Sample	XCorr Sequest HT	Confidence Sequest HT	Percolator q-Value Sequest HT	Percolator PEP Sequest HT
High	[R].ISETAQTEAR.[T]			0.194827	0	1	1	1	BA_3971	BA_3971 [306-315]	0	1105.55	High	1.77491	High	0	0.175
Master Protein	BA_0103	rpoC DNA-directed RNA polymerase subunit beta' 111962:115573 forward MW:134433		2.08829	1.33001	2	2	2	1	1203	134.347	8.57	High		0.055	3.85697	2
Confidence	Annotated Sequence	Modifications	Modifications in Master Proteins	Qvality PEP	Qvality q-value	# Protein Groups	# Proteins	# PSMs	Master Protein Accessions	Positions in Master Proteins	# Missed Cleavages	Theo. MH+ [Da]	Found in Sample: [S4] F4: Sample	XCorr Sequest HT	Confidence Sequest HT	Percolator q-Value Sequest HT	Percolator PEP Sequest HT
High	[K].TADSGYLTR.[R]			0.108848	0	1	1	1	BA_0103	BA_0103 [794-802]	0	983.479	High	1.87715	High	0	0.09501
High	[R].CGVEVTR.[A]	1xCarbamidomethyl [C1]		0.0987017	0	1	1	1	BA_0103	BA_0103 [78-84]	0	820.398	High	1.97982	High	0	0.08589
Master Protein	BA_0509	pfl formate acetyltransferase 503601:505850 forward MW:84539		0.980884	1.2016	1	1	1	1	749	84.484	5.96	High		0.049	1.8379	1
Confidence	Annotated Sequence	Modifications	Modifications in Master Proteins	Qvality PEP	Qvality q-value	# Protein Groups	# Proteins	# PSMs	Master Protein Accessions	Positions in Master Proteins	# Missed Cleavages	Theo. MH+ [Da]	Found in Sample: [S4] F4: Sample	XCorr Sequest HT	Confidence Sequest HT	Percolator q-Value Sequest HT	Percolator PEP Sequest HT
High	[R].EQQIDVINR.[T]			0.118947	0	1	1	1	BA_0509	BA_0509 [735-743]	0	1114.59	High	1.8379	High	0	0.1045
Master Protein	BA_0102	rpoB DNA-directed RNA polymerase subunit beta 108391:111924 forward MW:131875		1.6968	0.849618	1	1	1	1	1177	131.791	5.1	High		0.031	1.708	1
Confidence	Annotated Sequence	Modifications	Modifications in Master Proteins	Qvality PEP	Qvality q-value	# Protein Groups	# Proteins	# PSMs	Master Protein Accessions	Positions in Master Proteins	# Missed Cleavages	Theo. MH+ [Da]	Found in Sample: [S4] F4: Sample	XCorr Sequest HT	Confidence Sequest HT	Percolator q-Value Sequest HT	Percolator PEP Sequest HT
High	[K].GVTELTAEER.[L]			0.0247045	0	1	1	1	BA_0102	BA_0102 [849-858]	0	1104.55	High	1.708	High	0	0.0201
