# Supplementary material for: Disruption of Protein BA_3317 Affects Asymmetric Division as an Exporter of Sporulation Signal Molecules in Bacillus anthracis
Source: Research Square preprint supplement (doi:10.21203/rs.3.rs-8551494/v1), 2026-01-28
Supplement: Supplementary file 3 [file 72e651c2d2cff5f334031fc9.xlsx]

## Sheet: AgrABCD
			Table S4 QS systems in B. anthracis homologous
gene	Query_name	Score	E_value	Positive	Identity	Query_length	Query_start	Query_end	Query_percent	Subject_length	Subject_start	Subject_end	Subject_percent	Subject_name	Subject_discription	...
AgrA	gi|520998350|gb|AGP28990.1| AgrA	115	3e-27	127/241 (52%)	71/241 (29%)	238	1	238	1	244	1	236	0.9672	BA_3008	BA_3008 response regulator 2775167:2775901 reverse MW:28835
AgrA	gi|520998350|gb|AGP28990.1| AgrA	47.4	8e-07	101/231 (43%)	60/231 (25%)	238	1	213	0.895	246	2	212	0.8577	BA_5691	BA_5691 sensory transduction protein LytT 5178502:5179242 reverse MW:28357
AgrC	gi|161511620|gb|ABX60402.2| AgrC	144	8e-36	216/440 (49%)	102/440 (23%)	430	7	423	0.9698	438	4	430	0.9749	BA_3007	BA_3007 hypothetical protein 2773851:2775167 reverse MW:50736
AgrC	gi|161511620|gb|ABX60402.2| AgrC	58.5	8e-10	94/203 (46%)	51/203 (25%)	430	212	405	0.4512	529	309	499	0.3611	BA_0923	BA_0923 sensor histidine kinase 932706:934295 forward MW:59226
AgrC	gi|161511620|gb|ABX60402.2| AgrC	57	2e-09	97/219 (44%)	52/219 (23%)	430	188	402	0.5	534	290	500	0.3951	BA_0576	BA_0576 sensor histidine kinase 584647:586251 forward MW:59849
AgrC	gi|161511620|gb|ABX60402.2| AgrC	50.4	2e-07	108/256 (42%)	61/256 (23%)	430	177	418	0.5628	498	237	484	0.498	BA_1351	BA_1351 sporulation kinase D 1292464:1293960 reverse MW:56454
AgrC	gi|161511620|gb|ABX60402.2| AgrC	41.2	0.0001	119/274 (43%)	56/274 (20%)	430	144	403	0.6047	406	124	379	0.6305	BA_5028	BA_5028 sensor histidine kinase 4560078:4561298 reverse MW:46240
AgrC	gi|161511620|gb|ABX60402.2| AgrC	40	0.0003	97/219 (44%)	48/219 (21%)	430	196	406	0.4907	536	306	508	0.3787	BA_0559	BA_0559 sensor histidine kinase 566037:567647 forward MW:59925
AgrC	gi|161511620|gb|ABX60402.2| AgrC	39.3	0.0005	145/338 (42%)	73/338 (21%)	430	105	405	0.7	458	127	434	0.6725	BA_2861	BA_2861 sensor histidine kinase SrrB 2651861:2653237 reverse MW:52668
AgrD	gi|2506165|gb|AAB80783.1| AgrD	25.8	0.61	14/19 (73%)	9/19 (47%)	46	22	40	0.413	381	205	223	0.0499	BA_2547	BA_2547 acyl-CoA dehydrogenase 2370374:2371519 forward MW:41632
