# Supplementary material for: Disruption of Protein BA_3317 Affects Asymmetric Division as an Exporter of Sporulation Signal Molecules in Bacillus anthracis
Source: Research Square preprint supplement (doi:10.21203/rs.3.rs-8551494/v1), 2026-01-28
Supplement: Supplementary file 4 [file f79ced939374e8f034bfd4bb.xlsx]

## Sheet: Sheet1
Table S1 amino acid component medium
Components	Concentration(g/L)	Components	Concentration(g/L)
K2HPO4	5.23	CaCl2·2H2O	0.055
KH2PO4	4.08	(NH4)2SO4	1
MgSO4·7H2O	0.049	Guanine	0.03
MnSO4·H2O	0.015	D-ribose	0.12
FeSO4·7H2O	0.014	Glucose	3.6
Thiamin HCl	0.02
1×MEM Non-Essential Amino Acids Solution		1×MEM Amino Acids Solution
11140050, MEM Non-Essential Amino Acids Solution, 100× (Thermo Fisher Scientific,USA)
Components	Concentration(g/L)	Components	Concentration(g/L)
Glycine	0.75	L-Glutamic Acid	1.47
L-Alanine	0.89	L-Proline	1.15
L-Asparagine	1.32	L-Serine	1.05
L-Aspartic acid	1.33
11130051, MEM Amino Acids Solution, 50× (Thermo Fisher Scientific,USA)
Components	Concentration(g/L)	Components	Concentration(g/L)
L-Isoleucine	0.131	L-Threonine	0.119
L-Cystine	0.24	L-Tryptophan	0.204
L-Leucine	0.131	L-Tyrosine	0.181
L-Methionine	0.149	L-Valine	0.117
L-Phenylalanine	0.165
L-Arginine hydrochloride	0.211	L-Lysine hydrochloride	0.183
L-Histidine hydrochloride-H2O	0.21
